# Supplementary material for: Palladium(ii) complexes of bis(diphosphene) with different coordination behaviors
Source: Royal Society of Chemistry journal article supplement (doi:10.1039/d1dt03806k), 2022-01-01
Supplement: d1dt03806k1.pdf [file d1dt03806k1.pdf]

## Supporting Information

### **Palladium(II) Complexes of Bis(diphosphene) with the Different Coordination Behavior**

Rikako Ura, Akihiro Tsurusaki\* and Ken Kamikawa\*

Department of Chemistry, Graduate School of Science, Osaka Prefecture University, 1-1 Gakuen-cho, Naka-ku, Sakai, Osaka 599-8531, Japan.

*E-mail: tsurusaki@c.s.osakafu-u.ac.jp; kamikawa@c.s.osakafu-u.ac.jp*

#### **Table of Contents**

|                                      |      |
|--------------------------------------|------|
| 1. Experimental Details              | S2   |
| 2. Spectral Data                     | S7   |
| 3. Temperature dependent NMR spectra | S17  |
| 4. X-Ray Crystallographic Analysis   | S20  |
| 5. Theoretical Calculations          | S21  |
| 6. References                        | S143 |

## 1. Experimental Details

**General.** All anaerobic and/or moisture-sensitive manipulations were carried out with standard Schlenk techniques under nitrogen atmosphere or with glovebox techniques under argon atmosphere. Analytical thin-layer chromatography (TLC) was performed using Silicagel 70 F<sub>254</sub> TLC Plate-*Wako*. The developed chromatogram was analyzed by UV lamp (254 nm). The silica gel column chromatography was performed with Wako-gel® 60N (Wako, 150-425 μm, irregular) or Silica Gel 60 (nacalai, spherical, neutral under nitrogen or argon atmosphere). The <sup>1</sup>H (400 or 500 MHz), <sup>13</sup>C (100 or 125 MHz), and <sup>31</sup>P NMR (162 MHz) spectra were measured in CDCl<sub>3</sub> or CD<sub>2</sub>Cl<sub>2</sub> with a JEOL JNM-ECS400 or JEOL JNM-ECZ500R spectrometers. Signals due to tetramethylsilane (0.0 ppm) for CDCl<sub>3</sub> and CHDCl<sub>2</sub> (5.32 ppm) for CD<sub>2</sub>Cl<sub>2</sub> in <sup>1</sup>H NMR and CDCl<sub>3</sub> (77.16 ppm) and CD<sub>2</sub>Cl<sub>2</sub> (53.84 ppm) in <sup>13</sup>C NMR were used as internal references, and chemical shifts are reported in ppm downfield. <sup>31</sup>P NMR chemical shifts are externally referenced to 85% H<sub>3</sub>PO<sub>4</sub> (0 ppm). Low- and high-resolution mass spectra were recorded on a JEOL JMS-700 spectrometer at FAB (3-nitrobenzyl alcohol) mode or Bruker MicroTOF-II time-of-flight mass spectrometer (ESI). All melting points were determined on a Yanaco micro melting point apparatus (MP-J3) and were uncorrected.

### Reagents.

THF, Et<sub>2</sub>O, dichloromethane, acetonitrile (Wako, Super dehydrated grade), and *n*-pentane (Kanto, dehydrated grade) were purchased and used as received. CDCl<sub>3</sub> and CD<sub>2</sub>Cl<sub>2</sub> used in a glovebox was dried over calcium hydride, degassed by freeze-pump-thaw cycles, distilled in a vacuum line, and stored in a glovebox. Azobis(isobutyronitrile) (Wako), *N*-bromosuccinimide (NBS, Oakwood), CCl<sub>4</sub> (Wako), dimethylzinc (Kanto, 1.0 M, *n*-hexane), lithium aluminum hydride, (Aldrich), chlorotrimethylsilane (Aldrich), *n*-BuLi (Mitsuwa or Kanto), allylpalladium(II) chloride dimer (TCI), and sodium tetrakis[3,5-bis(trifluoromethyl)phenyl]borate (NaBAR<sup>F</sup><sub>4</sub>, Ark Pharm) were purchased and used as received. and 1,8-diazabicyclo[5.4.0]undec-7-ene (DBU) was distilled from potassium hydroxide prior to use. (*S*)-Diethyl 3-methyl-(1,1'-binaphthylen)-2-ylphosphonate [(*S*)-**3**],<sup>S1</sup> chlorotris(triphenylphosphine)-rhodium(I) (Wilkinson's catalyst),<sup>S2</sup> Mes\*PCL<sub>2</sub>,<sup>S3</sup> [Pd(allyl)(cod)](SbF<sub>6</sub>),<sup>S4</sup> and [PdCl<sub>2</sub>(cod)]<sup>S5</sup> were synthesized according to the reported procedures.

### Synthesis of (*S*)-Diethyl 3-bromomethyl-(1,1'-binaphthylen)-2-ylphosphonate [(*S*)-**4**]

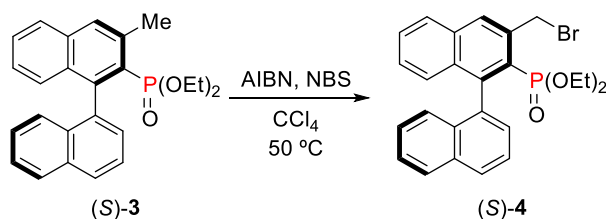

A solution of (*S*)-**3** (404 mg, 1.00 mmol), AIBN (49.3 mg, 0.300 mmol), and NBS (196 mg, 1.10 mmol) in CCl<sub>4</sub> (10 mL) was stirred at 45 °C for 2 h. Saturated aqueous sodium thiosulfate solution and CHCl<sub>3</sub> were added. The organic layer was separated, and then the aqueous layer was extracted with CHCl<sub>3</sub>. The combined organic layer was washed with brine, dried over MgSO<sub>4</sub>, filtered through a pad of Celite, and

then evaporated under reduced pressure. The residue was chromatographed on silica gel with hexane/AcOEt = 2/1 ( $R_f$  = 0.35) to give (*S*)-**4** as colorless solid (406 mg, 0.872 mmol, 87%).

Mp. 93 °C (decomp.);  $[\alpha]_D^{24} = +32.2$  ( $c = 0.05$  in  $\text{CHCl}_3$ );  $^1\text{H NMR}$  (400 MHz,  $\text{CDCl}_3$ )  $\delta = 0.60$  (t,  $J = 6.9$  Hz, 3H), 1.12 (t,  $J = 6.9$  Hz, 3H), 3.32 (ddq,  $J = 9.7, 6.9, 6.9$  Hz, 1H), 3.57 (ddq,  $J = 9.7, 6.9, 6.9$  Hz, 1H), 3.80 (ddq,  $J = 10.1, 8.2, 6.9$  Hz, 1H), 3.93 (ddq,  $J = 10.1, 6.9, 6.9$  Hz, 1H), 5.23 (d,  $J = 10.1$  Hz, 1H), 5.70 (d,  $J = 10.1$  Hz, 1H), 7.01 (d,  $J = 8.7$  Hz, 1H), 7.11 (d,  $J = 8.3$  Hz, 1H), 7.20-7.26 (m, 2H), 7.40 (dd,  $J = 7.2, 1.2$  Hz, 1H), 7.44 (ddd,  $J = 8.3, 6.9, 1.4$  Hz, 1H), 7.52 (ddd,  $J = 7.8, 6.9, 0.9$  Hz, 1H), 7.56 (dd,  $J = 8.3, 6.9$  Hz, 1H), 7.88 (d,  $J = 8.2$  Hz, 1H), 7.93 (d,  $J = 9.2$  Hz, 1H), 7.95 (d,  $J = 9.6$  Hz, 1H), 8.16 (d,  $J = 4.6$  Hz, 1H);  $^{13}\text{C NMR}$  (100 MHz,  $\text{CDCl}_3$ )  $\delta = 15.4$  (d,  $J = 6.7$  Hz,  $\text{CH}_3$ ), 16.2 (d,  $J = 6.7$  Hz,  $\text{CH}_3$ ), 34.6 ( $\text{CH}_2$ ), 61.86 (d,  $J = 5.7$  Hz,  $\text{CH}_2$ ), 61.91 (d,  $J = 5.8$  Hz,  $\text{CH}_2$ ), 124.96 (CH), 125.02 (d,  $J = 185$  Hz), 125.7 (CH), 125.9 (CH), 126.7 (CH), 127.4 (CH), 127.7 (CH), 128.07 (CH), 128.14 (CH), 128.23 (CH), 128.27 (CH), 128.5 (CH), 132.5 (d,  $J = 14.5$  Hz, CH), 133.06 (d,  $J = 6.8$  Hz), 133.14 (d,  $J = 8.6$  Hz), 133.6, 134.4 (d,  $J = 2.0$  Hz), 137.3 (d,  $J = 4.8$  Hz), 137.6 (d,  $J = 11.6$  Hz), 145.5 (d,  $J = 9.6$  Hz);  $^{31}\text{P}$   $\{^1\text{H}\}$  NMR (162 MHz,  $\text{CDCl}_3$ )  $\delta = 16.9$ ; HRMS (FAB, NBA):  $m/z$  found: 483.0717  $[M+H]^+$ ; calcd for  $\text{C}_{25}\text{H}_{25}\text{BrO}_3\text{P}$ : 483.0725.

#### Synthesis of (*S,S*)-Tetraethyl (ethane-1,2-diylbis([1,1'-binaphthylen]-3,2-diyl))bis(phosphonate) [(*S,S*)-**5**]

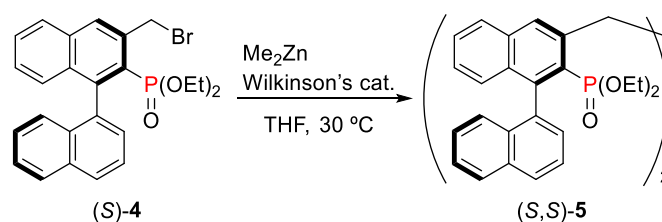

This compound was prepared according to the synthetic procedures reported by Ando and co-worker.<sup>S6</sup> A solution of (*S*)-**4** (233 mg, 0.482 mmol), Wilkinson's catalyst (23 mg, 0.025 mmol), and  $\text{ZnMe}_2$  in *n*-hexane (1.0 M; 500  $\mu\text{L}$ , 0.500 mmol) in THF (10 mL) was stirred at 30 °C for 12 h. Water and ethyl acetate were added. The organic layer was separated, and then the aqueous layer was extracted with ethyl acetate. The combined organic layer was washed with brine, dried over  $\text{MgSO}_4$ , filtered through a pad of Celite, and then evaporated under reduced pressure. The residue was chromatographed on silica gel with hexane/AcOEt = 1/1 ( $R_f$  = 0.35) to give (*S,S*)-**5** as colorless solid (148 mg, 0.183 mmol, 76%).

Mp. 105 °C (decomp.);  $[\alpha]_D^{24} = +77.0$  ( $c = 0.05$  in  $\text{CHCl}_3$ );  $^1\text{H NMR}$  (400 MHz,  $\text{CDCl}_3$ )  $\delta = 0.77$  (t,  $J = 6.9$  Hz, 6H), 1.01 (t,  $J = 6.9$  Hz, 6H), 3.35 (ddq,  $J = 10.1, 6.9, 6.9$  Hz, 2H), 3.61 (ddq,  $J = 10.1, 8.2, 6.9$  Hz, 2H), 3.71 (ddq,  $J = 10.1, 7.4, 6.9$  Hz, 2H), 3.84-3.94 (m, 2H), 3.91 (s, 4H), 6.99 (d,  $J = 8.7$  Hz, 2H), 7.13 (ddd,  $J = 8.2, 6.4, 1.4$  Hz, 2H), 7.26-7.28 (m, 4H), 7.41-7.48 (m, 6H), 7.59 (dd,  $J = 8.2, 6.9$  Hz, 2H), 7.85 (d,  $J = 8.2$  Hz, 2H), 7.94 (d,  $J = 7.8$  Hz, 2H), 7.96 (d,  $J = 7.3$  Hz, 2H), 8.20 (d,  $J = 5.0$  Hz, 2H);  $^{13}\text{C NMR}$  (100 MHz,  $\text{CDCl}_3$ )  $\delta = 15.7$  (d,  $J = 6.7$  Hz,  $\text{CH}_3$ ), 16.1 (d,  $J = 5.8$  Hz,  $\text{CH}_3$ ), 38.1 ( $\text{CH}_2$ ), 61.3 (d,  $J = 6.7$  Hz,  $\text{CH}_2$ ), 61.7 (d,  $J = 5.8$  Hz,  $\text{CH}_2$ ), 125.1 (CH), 125.7 (CH), 125.89 (CH), 125.93 (CH), 126.1 (d,  $J = 184$  Hz), 126.9 (CH), 127.5 (CH), 127.65 (CH), 127.74 (CH), 127.9 (CH), 128.0 (CH), 128.1 (CH), 130.3 (d,  $J = 14.5$  Hz, CH), 131.9 (d,  $J = 16.3$  Hz), 133.2, 133.8, 134.7 (d,  $J = 2.9$  Hz), 138.6 (d,  $J = 4.9$  Hz), 142.0 (d,  $J = 12.5$  Hz), 144.2 (d,  $J = 10.6$  Hz);  $^{31}\text{P}$   $\{^1\text{H}\}$  NMR (162 MHz,  $\text{CDCl}_3$ )  $\delta = 18.7$ ; HRMS (FAB, NBA):  $m/z$

found: 807.3004  $[M+H]^+$ ; calcd for  $C_{50}H_{49}O_6P_2$ : 807.3004.

### Synthesis of 1,2-bis(2-phosphino-[1,1'-binaphthalen]-3-yl)ethane [(*S,S*)-6]

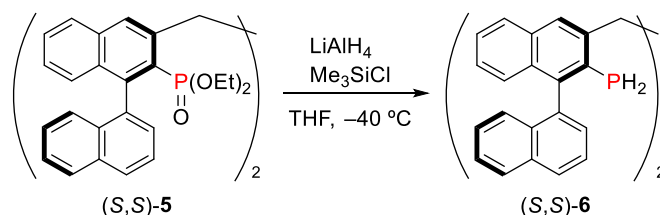

To a suspension of lithium aluminum hydride (41.7 mg, 1.10 mmol) in THF (2 mL) was added chlorotrimethylsilane (162  $\mu\text{L}$ , 1.28 mmol) at  $-40\text{ }^\circ\text{C}$ . After the mixture was stirred at  $-40\text{ }^\circ\text{C}$  for 5 min and at room temperature for 30 min, (*S,S*)-5 (148 mg, 0.183 mmol) in THF (3 mL) was added. The mixture was stirred at  $-40\text{ }^\circ\text{C}$  for 1 h, and then quenched with degassed water (20  $\mu\text{L}$ , 1.1 mmol) at  $0\text{ }^\circ\text{C}$  and dried over  $\text{MgSO}_4$ . After THF was evaporated under reduced pressure, the residue was chromatographed on silica gel under nitrogen atmosphere with hexane/ $\text{CH}_2\text{Cl}_2 = 3/1$  ( $R_f = 0.88$ ) to give (*S,S*)-6 as colorless solid (77.4 mg, 0.129 mmol, 70%).

Mp.  $151\text{ }^\circ\text{C}$  (decomp.);  $[\alpha]_D^{24} = +67.7$  ( $c = 0.05$  in  $\text{CHCl}_3$ );  $^1\text{H NMR}$  (400 MHz,  $\text{CDCl}_3$ )  $\delta = 3.40\text{-}3.55$  (m, 4H), 3.44 (dd,  $J = 214, 12.0$  Hz, 2H), 3.67 (dd,  $J = 209, 12.0$  Hz, 2H), 7.05 (d,  $J = 8.2$  Hz, 2H), 7.17-7.22 (m, 4H), 7.27 (ddd,  $J = 7.8, 6.9, 1.4$  Hz, 2H), 7.37 (dd,  $J = 6.9, 0.9$  Hz, 2H), 7.42 (ddd,  $J = 8.3, 6.9, 0.9$  Hz, 2H), 7.49 (ddd,  $J = 8.3, 6.9, 1.4$  Hz, 2H), 7.62 (dd,  $J = 8.3, 6.9$  Hz, 2H), 7.84 (d,  $J = 8.3$  Hz, 2H), 7.86 (d,  $J = 1.7$  Hz, 2H), 7.97 (d,  $J = 8.7$  Hz, 2H), 7.99 (d,  $J = 8.7$  Hz, 2H);  $^{13}\text{C}$   $\{^1\text{H}\}$  NMR (100 MHz,  $\text{CDCl}_3$ )  $\delta = 37.5\text{-}37.6$  (m,  $\text{CH}_2$ ), 125.9 ( $\text{CH} \times 2$ ), 126.0 (CH), 126.23 (CH), 126.26 (CH), 126.63 (CH), 126.66 (CH), 127.4 (CH), 127.6 (CH), 128.1 (CH), 128.3 (CH), 128.5 (CH), 129.5 (d,  $J = 12.5$  Hz), 132.2, 132.3, 133.2, 134.0, 138.9, 140.8-140.9 (m), 142.6-142.7 (m).  $^{31}\text{P NMR}$  (162 MHz,  $\text{CDCl}_3$ )  $\delta = -142.8$  (t,  $^1J_{\text{PH}} = 212$  Hz); HRMS (FAB, NBA):  $m/z$  found: 599.2054  $[M+H]^+$ ; calcd for  $\text{C}_{42}\text{H}_{33}\text{P}_2$ : 599.2057.

### Synthesis of 1,2-bis(2-(2,4,6-tri-*tert*-butylphenyl)diphosphenyl)-[1,1'-binaphthalen]-3-yl)ethane [(*S,S*)-2]

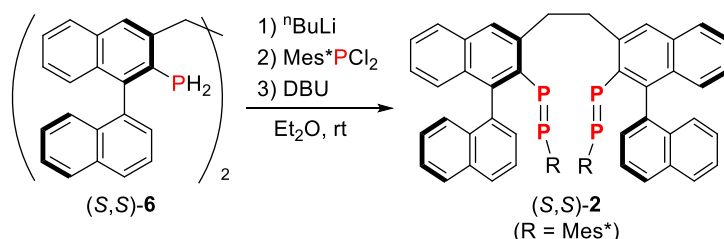

To a solution of phosphine (*S,S*)-6 (45 mg, 75  $\mu\text{mol}$ ) in  $\text{Et}_2\text{O}$  (2 mL) was added *n*-BuLi (1.58 M in hexane; 97  $\mu\text{L}$ , 154  $\mu\text{mol}$ ) dropwise at room temperature in a glovebox filled with an argon. After the mixture was stirred at room temperature for 10 min,  $\text{Mes}^*\text{PCl}_2$  (104 mg, 299  $\mu\text{mol}$ ) was added in one portion. The mixture was stirred for 30 min. DBU (46 mg, 302  $\mu\text{mol}$ ) in  $\text{Et}_2\text{O}$  (2 mL) was added. The reaction mixture was stirred for 30 min, and then the solvent was removed under reduced pressure. The residue was chromatographed on silica gel with hexane/toluene = 3/1 ( $R_f = 0.15$ ) to give (*S,S*)-2 as yellow solid (24 mg,

21  $\mu\text{mol}$ , 28%).

Mp. 153  $^{\circ}\text{C}$  (decomp.);  $[\alpha]_{\text{D}}^{24} = +250$  ( $c = 0.01$  in  $\text{CH}_2\text{Cl}_2$ );  $^1\text{H}$  NMR (400 MHz,  $\text{CDCl}_3$ )  $\delta = 0.90$  (br s, 36H), 1.23 (s, 18H), 3.57 (s, 4H), 6.89 (d,  $J = 8.9$  Hz, 2H), 7.13-7.18 (m, 2H), 7.22 (s, 4H), 7.24-7.28 (m, 2H), 7.40-7.47 (m, 8H), 7.50 (dd,  $J = 8.0, 6.8$  Hz, 2H), 7.82 (d,  $J = 8.0$  Hz, 2H), 7.89 (d,  $J = 7.5$  Hz, 2H), 7.905 (s, 2H), 7.906 (d,  $J = 7.7$  Hz, 2H).  $^{13}\text{C}$   $\{^1\text{H}\}$  NMR (126 MHz,  $\text{CDCl}_3$ )  $\delta = 31.4$  ( $\text{CH}_3$ ), 33.7 ( $\text{CH}_3$ ), 34.8, 37.8 ( $\text{CH}_2$ ), 38.2, 122.3 (CH), 125.8 (CH), 126.0 (CH), 126.3 (CH), 126.5 (CH  $\times 2$ ), 126.7 (CH), 126.9 (CH), 127.2 (CH), 127.5 (CH), 128.3 (CH), 128.4 (CH), 128.6 (CH), 132.5, 133.2, 133.7, 134.3, 137.4 (dd,  $J = 48$  Hz), 138.3, 140.8, 141.6, 141.9 (d,  $J = 48$  Hz), 149.5, 153.5;  $^{31}\text{P}$   $\{^1\text{H}\}$  NMR (162 MHz,  $\text{CDCl}_3$ )  $\delta = 451.1, 528.8$  (d,  $^1J_{\text{PP}} = 570$  Hz); HRMS (ESI, positive):  $m/z$  found: 1169.5574 [ $M+\text{Na}$ ] $^+$ , calcd for  $\text{C}_{78}\text{H}_{86}\text{P}_4+\text{Na}$ : 1169.5578.

### Reaction of (*S,S*)-**2** with $[\text{Pd}(\pi\text{-allyl})(\text{cod})](\text{SbF}_6)$

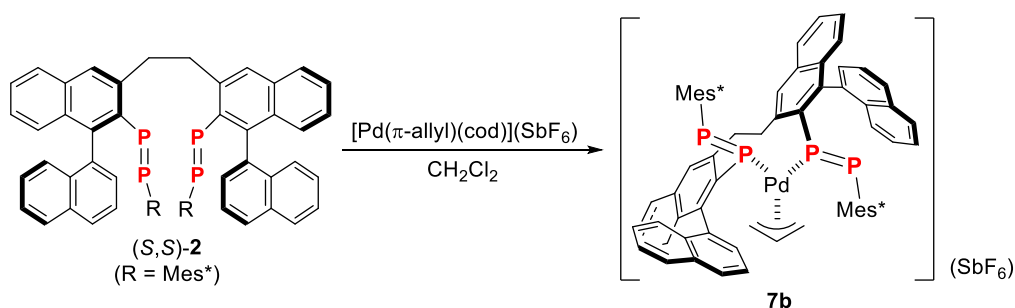

To a mixture of (*S,S*)-**2** (8.6 mg, 7.5  $\mu\text{mol}$ ) and  $[\text{Pd}(\pi\text{-allyl})(\text{cod})](\text{SbF}_6)$  (3.6 mg, 7.3  $\mu\text{mol}$ ) was added  $\text{CH}_2\text{Cl}_2$  (1 mL) in a glovebox filled with an argon. After the reaction mixture was stirred at room temperature for 10 min, the volatiles were removed under reduced pressure. The residue was washed with pentane and diethyl ether to give palladium complex **7b** as orange solid (10.5 mg, 6.9  $\mu\text{mol}$ , 91%).

Mp. 193  $^{\circ}\text{C}$  (decomp.).  $^1\text{H}$  NMR (500 MHz,  $\text{CD}_2\text{Cl}_2$ )  $\delta = 0.44$  (s, 9H), 0.45 (s, 9H), 0.78 (s, 9H), 0.84 (s, 9H), 1.24 (s, 9H), 1.32 (s, 9H), 1.65-1.71 (m, 1H), 2.29-2.34 (m, 1H), 3.38-3.44 (m, 1H), 3.48-3.54 (m, 1H), 3.66-3.85 (m, 4H), 4.48 (tt,  $J = 13.6, 7.3$  Hz, 1H), 6.77 (d,  $J = 8.6$  Hz, 1H), 6.81 (d,  $J = 8.5$  Hz, 1H), 7.04-7.06 (m, 2H), 7.17-7.19 (m, 2H), 7.21-7.31 (m, 8H), 7.36-7.39 (m, 2H), 7.56-7.62 (m, 4H), 7.96 (d,  $J = 7.4$  Hz, 1H), 7.98 (d,  $J = 8.2$  Hz, 1H), 8.00-8.06 (m, 4H), 8.17 (s, 1H), 8.20 (s, 1H);  $^{13}\text{C}$   $\{^1\text{H}\}$  NMR (125 MHz,  $\text{CD}_2\text{Cl}_2$ )  $\delta = 31.5$  ( $\text{CH}_3$ ), 31.6 ( $\text{CH}_3$ ), 33.0 ( $\text{CH}_3$ ), 33.1 ( $\text{CH}_3$ ), 34.5 ( $\text{CH}_3$ ), 34.6 ( $\text{CH}_3$ ), 35.1, 35.2, 37.7 ( $\times 2$ ), 39.0 ( $\times 2$ ), 39.3 ( $\text{CH}_2$ ), 75.0 (d,  $J = 22$  Hz,  $\text{CH}_2$ ), 78.0 (d,  $J = 24$  Hz,  $\text{CH}_2$ ), 118.8 (CH), 121.9 (CH), 122.1 (CH), 123.4 (CH), 123.6 (CH), 124.3 (CH), 124.9 (CH), 126.0 ( $\times 2$ ), 126.5 (CH  $\times 2$ ), 127.0 (CH), 127.1 (CH), 127.22 (CH), 127.25 (CH), 127.4 (CH), 127.5 (CH), 127.77 (CH  $\times 3$ ), 127.85 (CH), 128.1 (CH  $\times 2$ ), 128.7 (CH  $\times 2$ ), 128.8 (CH), 129.0 (CH), 129.1 (CH), 129.2 (CH), 130.60 (CH), 130.65 (CH), 132.8, 132.9, 134.10, 134.14, 135.06, 135.10, 135.21, 135.27, 138.0, 138.4, 141.3 ( $\times 2$ ), 144.3 ( $\times 2$ ), 152.3, 152.4, 158.3, 158.4; Four quaternary carbon signals bound to a phosphorus atom could not be observed due to their low intensity.  $^{31}\text{P}$  NMR (162 MHz,  $\text{CDCl}_3$ )  $\delta = 334.2$  ( $J_{\text{PP}} = 532, 36$  Hz), 339.0 ( $J_{\text{PP}} = 530, 36$  Hz), 470.0 ( $J_{\text{PP}} = 532$  Hz), 479.4 ( $J_{\text{PP}} = 530$  Hz); HRMS (ESI, positive)  $m/z$  found: 1293.5107. ( $M^+$ ), calcd for  $\text{C}_{81}\text{H}_{91}\text{P}_4^{106}\text{Pd}$  1293.5106. HRMS (ESI, negative)  $m/z$  found: 234.8940 ( $[\text{SbF}_6]^-$ ), calcd for  $\text{SbF}_6$  234.8942.

## Reaction of (*S,S*)-2 with [PdCl<sub>2</sub>(cod)]<sub>2</sub>

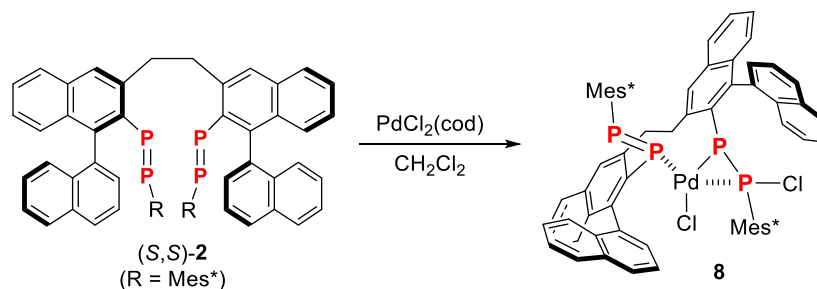

To a mixture of (*S,S*)-2 (19.1 mg, 16.7  $\mu\text{mol}$ ) and PdCl<sub>2</sub>(cod) (4.8 mg, 16.7  $\mu\text{mol}$ ) was added CH<sub>2</sub>Cl<sub>2</sub> (1 mL) in a glovebox filled with an argon. After the reaction mixture was stirred at room temperature for 10 min, the volatiles were removed under reduced pressure. Pentane and acetonitrile were added to the residue, and then the pentane layer was collected. The solvent was removed under reduced pressure to give palladium complex **8** as orange solid (12.3 mg, 9.28  $\mu\text{mol}$ , 55%).

Mp. 158 °C (decomp.); <sup>1</sup>H NMR (500 MHz, CD<sub>2</sub>Cl<sub>2</sub>)  $\delta$  = 0.41 (s, 9H), 0.8 (br s, 9H), \*1) 1.31 (s, 9H), 1.39 (s, 9H), 1.4 (br s, 9H), \*1) 1.62 (s, 9H), 3.27-3.36 (m, 2H), 3.90-3.95 (m, 1H), 5.48-5.53 (m, 1H), 5.63 (ddd,  $J$  = 8.1, 6.8, 1.2 Hz, 1H), 5.68 (d,  $J$  = 8.1 Hz, 1H), 6.28 (d,  $J$  = 8.6 Hz, 1H), 6.55 (dd,  $J$  = 6.9, 1.2 Hz, 1H), 6.70 (d,  $J$  = 9.1 Hz, 1H), 6.90 (dd,  $J$  = 8.6, 6.9 Hz, 1H), 6.94 (ddd,  $J$  = 8.6, 6.8, 1.2 Hz, 1H), 7.02 (ddd,  $J$  = 8.6, 6.8, 1.7 Hz, 1H), 7.16 (d,  $J$  = 1.2 Hz, 1H), 7.17 (d,  $J$  = 8.0 Hz, 1H), 7.19-7.28 (m, 3H), 7.31 (s, 1H), 7.33-7.39 (m, 3H), 7.38 (d,  $J$  = 1.8 Hz, 1H), 7.40-7.43 (m, 1H), 7.45-7.50 (m, 2H), 7.60 (d,  $J$  = 8.1 Hz, 1H), 7.67 (d,  $J$  = 8.6 Hz, 1H), 7.72 (d,  $J$  = 8.6 Hz, 1H), 7.85 (d,  $J$  = 8.0 Hz, 1H), 7.92 (d,  $J$  = 8.0 Hz, 1H), 7.93 (d,  $J$  = 8.1 Hz, 1H), 7.98 (s, 1H); \*1) These signals could not be observed at room temperature likely due to the coalescence, and became sharpened at low temperature (Figures S21 and S22). <sup>13</sup>C {<sup>1</sup>H} NMR (125 MHz, CD<sub>2</sub>Cl<sub>2</sub>)  $\delta$  = 31.3 (CH<sub>3</sub>), 31.5 (CH<sub>3</sub>), 32.6 (br, CH<sub>3</sub>), 33.60, 33.65, 34.3 (br, CH<sub>3</sub>), 34.9, 35.2, 35.7 (CH<sub>2</sub>), 37.5, 39.0, 40.0 (CH<sub>2</sub>), 122.9 (CH), 123.1 (CH), 124.9 (CH), 125.73 (CH), 125.78 (CH), 126.1 (CH), 126.2 (CH), 126.32 (CH), 126.36 (CH), 126.5 (CH), 126.64 (CH), 126.67 (CH), 127.0 (CH), 127.1 (CH), 127.2 (CH), 127.49 (CH), 127.52 (CH), 127.6 (CH), 127.8 (CH), 127.9 (CH), 128.0 (CH), 128.18 (CH), 128.21 (CH), 128.6 (CH), 128.9 (CH), 129.0 (d,  $J$  = 101 Hz), 129.7 (CH), 131.19 (CH), 131.25, 132.3, 132.6, 134.0 ( $\times$ 2), 134.1, 134.2, 134.5, 137.9 (d,  $J$  = 6.7 Hz), 138.9 ( $\times$ 2), 139.1, 139.7 (d,  $J$  = 4.8 Hz), 140.5 (br), 141.8, 145.2 (dd,  $J$  = 28.9, 9.6 Hz), 151.7 (d,  $J$  = 2.9 Hz), 152.3, 152.5 (d,  $J$  = 10.6 Hz), 153.7 (d,  $J$  = 8.7 Hz); Several carbon signals could not be observed due to their low intensity and/or superimposition. <sup>31</sup>P {<sup>1</sup>H} NMR (162 MHz, CDCl<sub>3</sub>)  $\delta$  = -39.6 (d,  $J$  = 591 Hz), 97.4 (ddd,  $J$  = 591, 385, 16 Hz), 338.9 (dd,  $J$  = 540, 385 Hz), 463.2 (dd,  $J$  = 540, 16 Hz); HRMS (ESI, positive):  $m/z$  found: 1287.4396 [M-Cl]<sup>+</sup>; calcd for C<sub>78</sub>H<sub>86</sub>ClP<sub>4</sub>Pd: 1287.4403.

## 2. Spectral Data

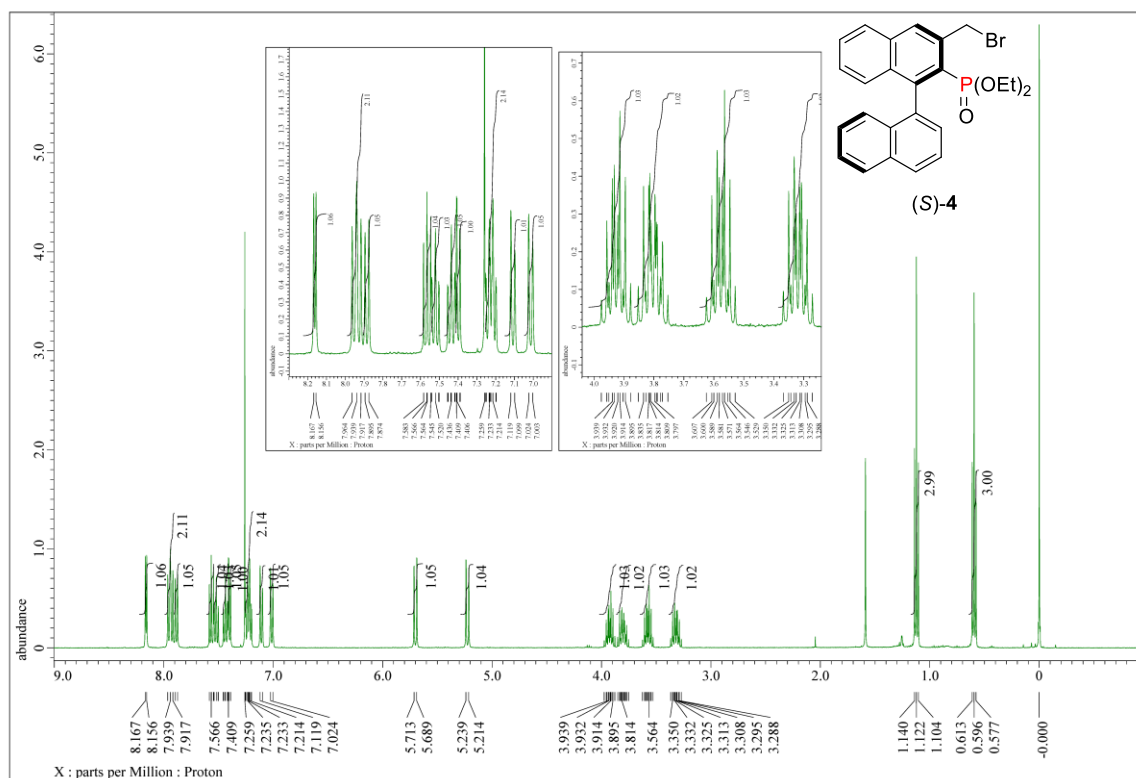

Figure S1. <sup>1</sup>H NMR Spectrum of (S)-4.

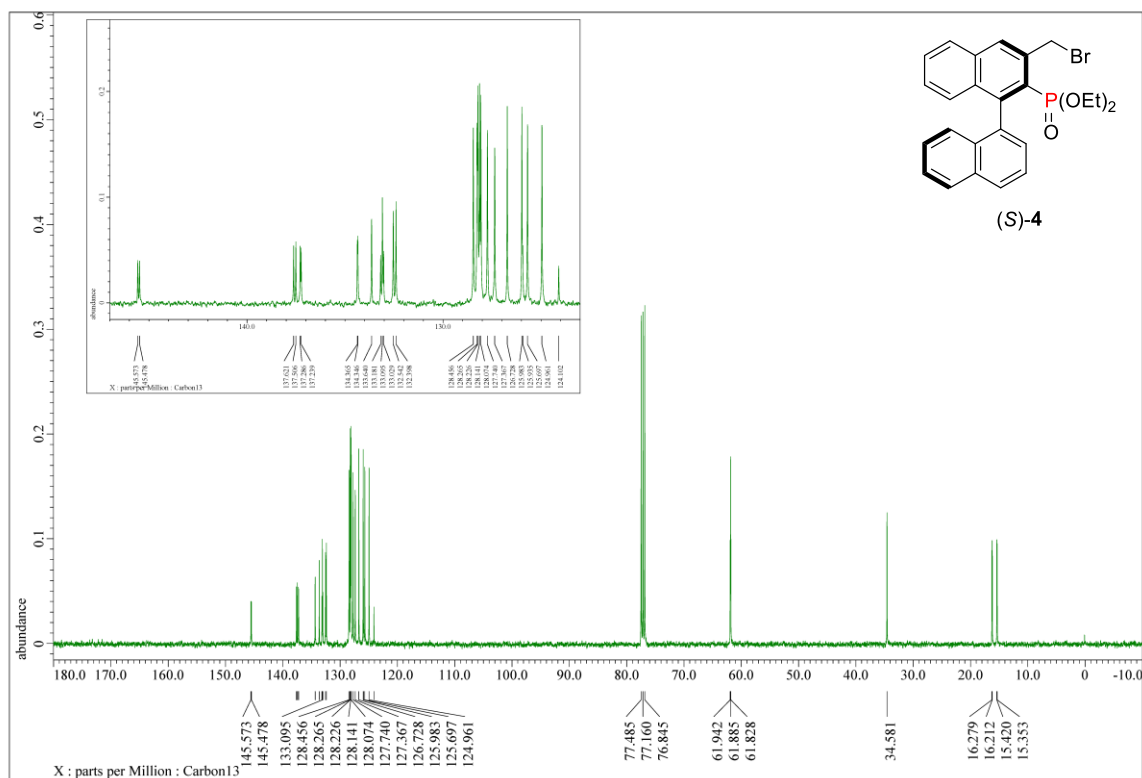

Figure S2. <sup>13</sup>C NMR Spectrum of (S)-4.

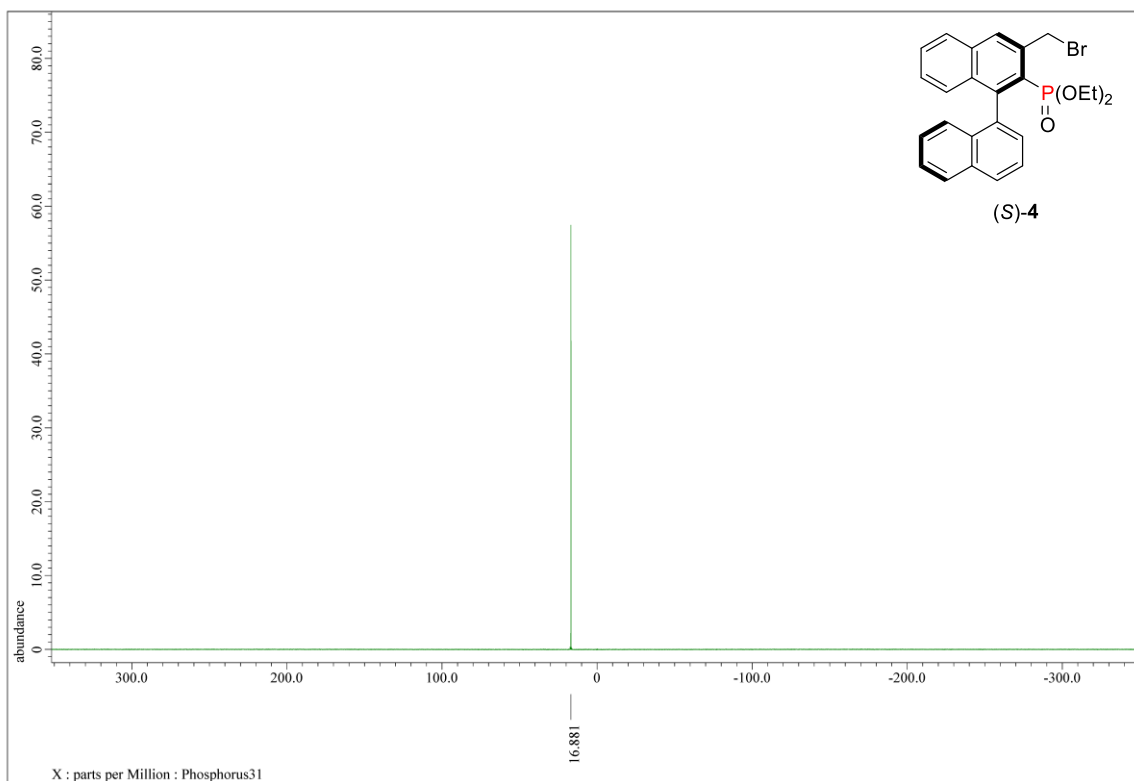

Figure S3.  $^{31}\text{P}$  NMR Spectrum of (S)-4.

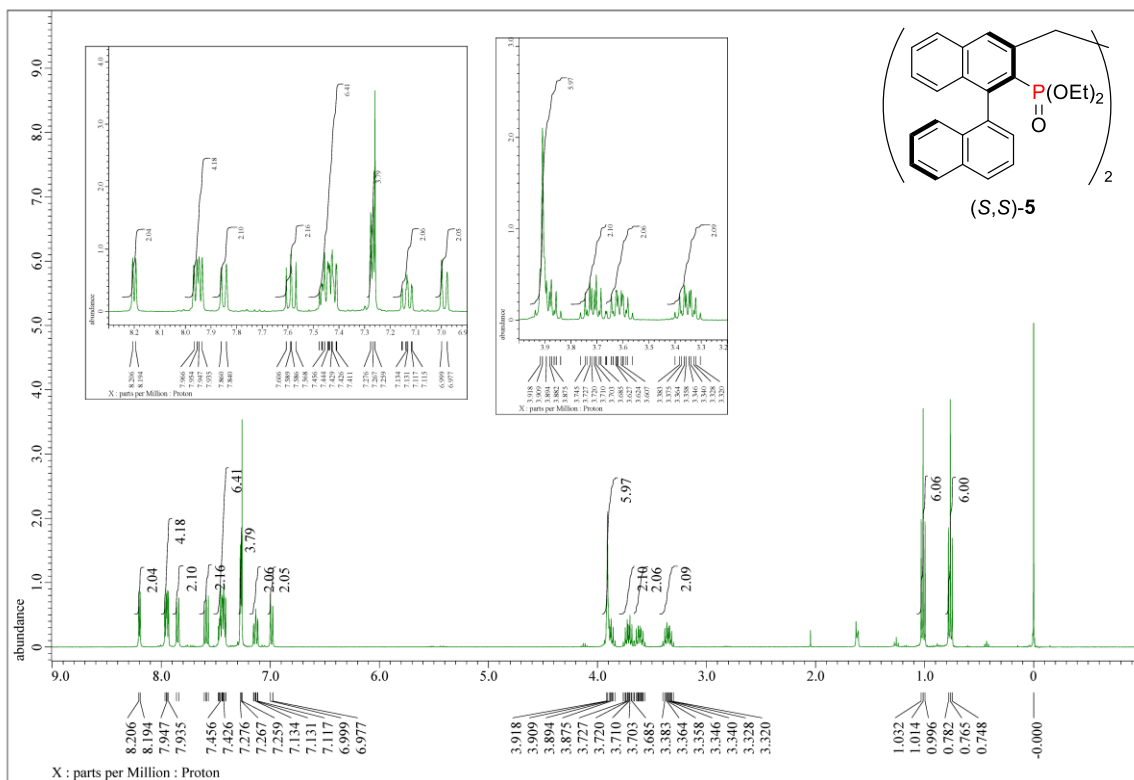

Figure S4.  $^1\text{H}$  NMR Spectrum of (S,S)-5.



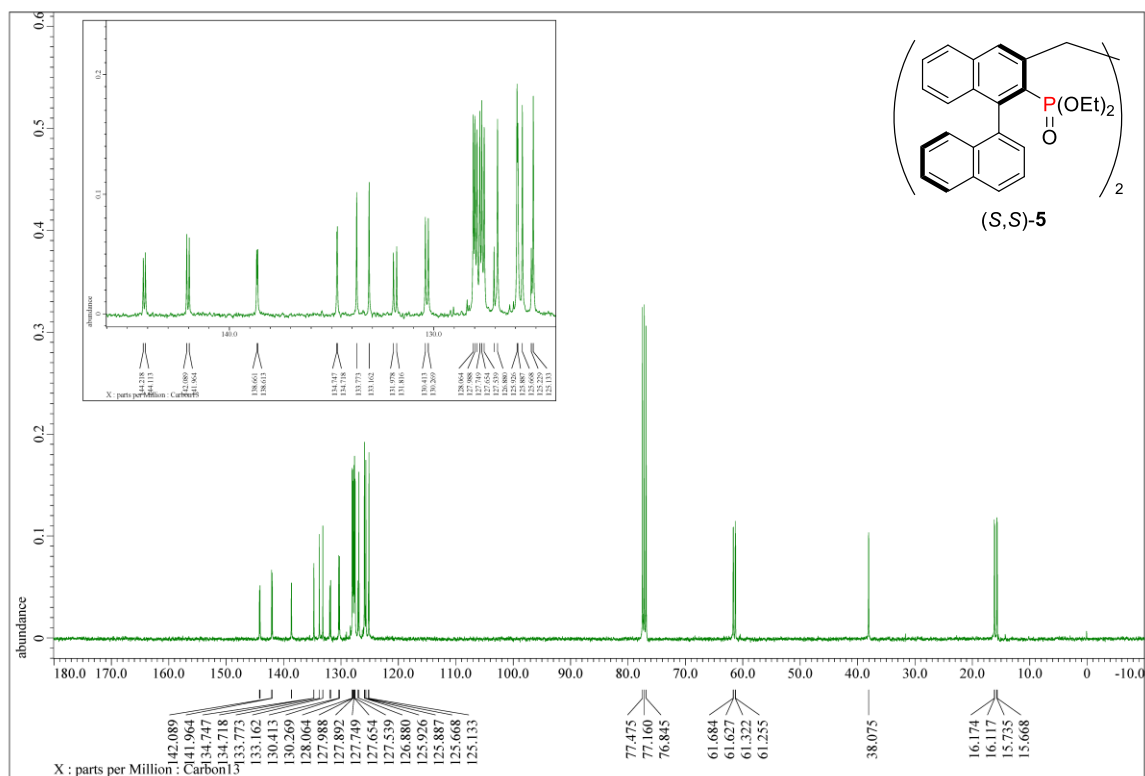

Figure S5. <sup>13</sup>C NMR Spectrum of (S,S)-5.

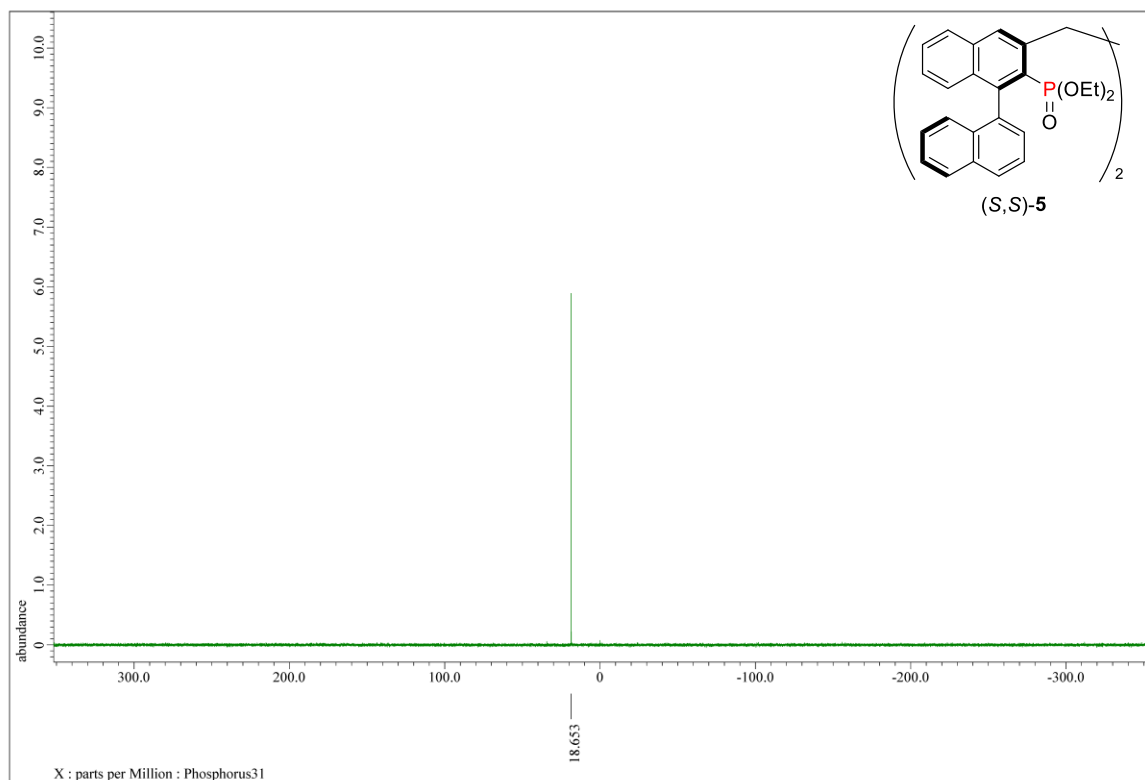

Figure S6. <sup>31</sup>P NMR Spectrum of (S,S)-5.

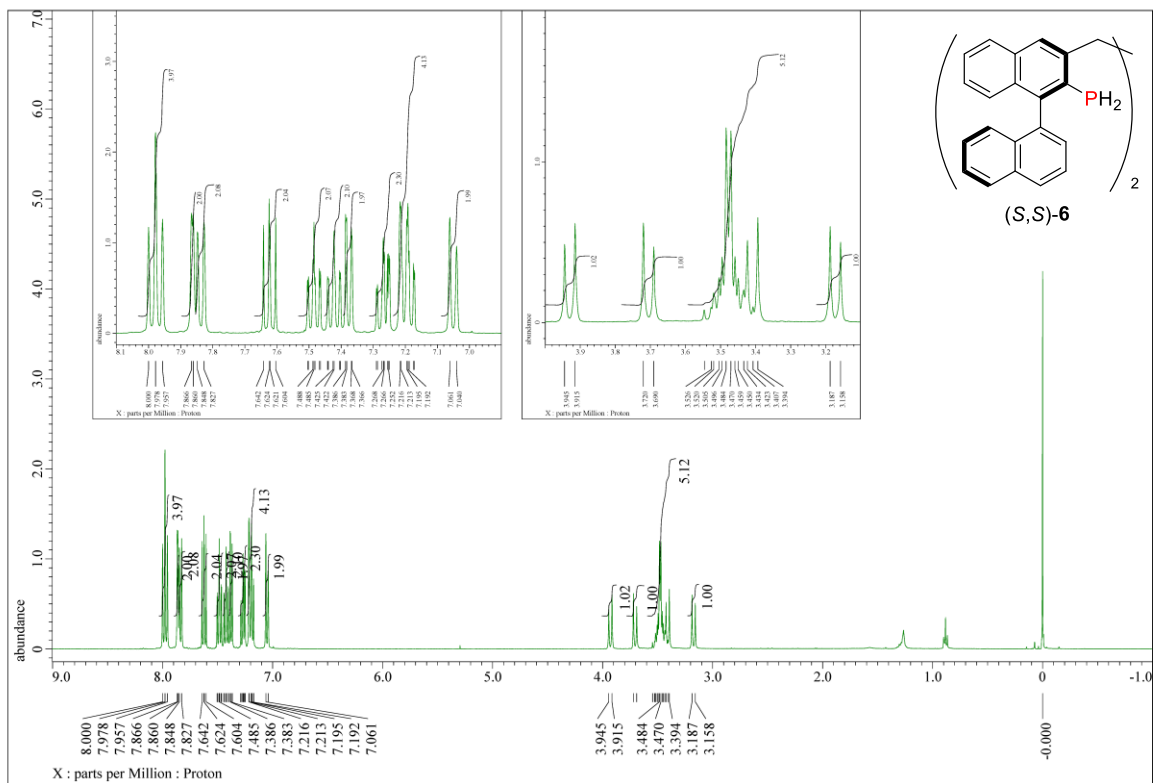

Figure S7. <sup>1</sup>H NMR Spectrum of (S,S)-6.

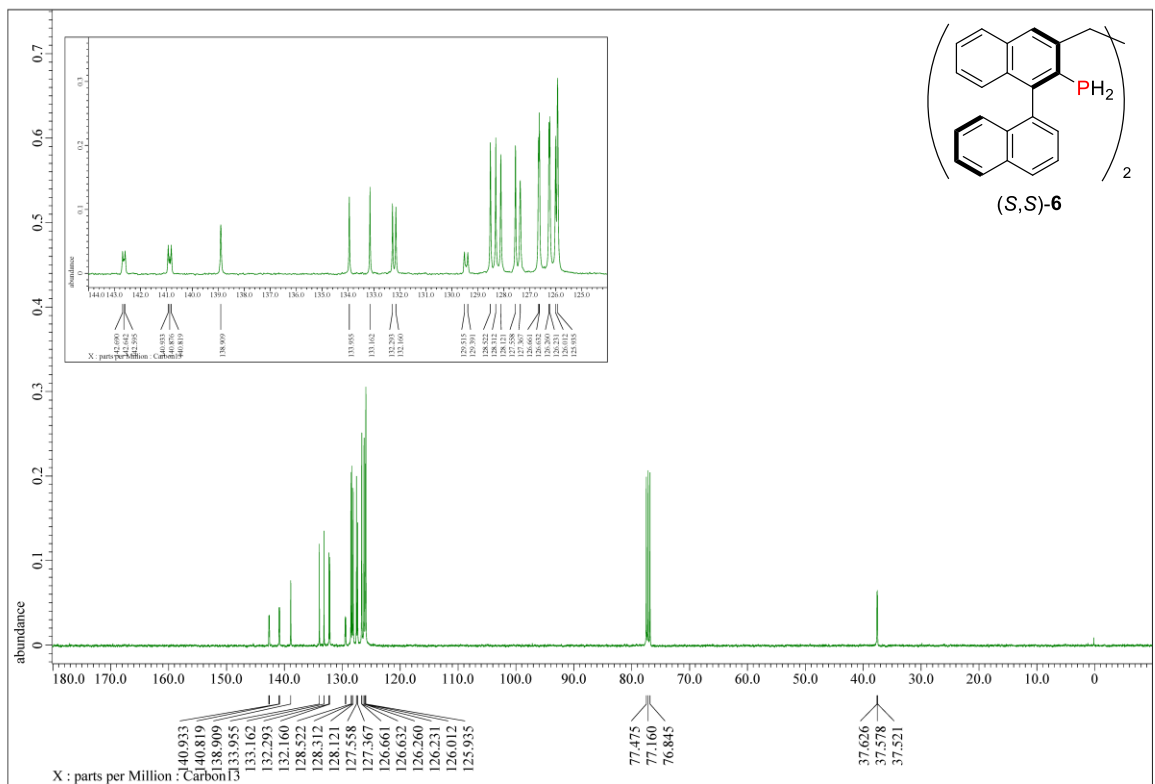

Figure S8. <sup>13</sup>C NMR Spectrum of (S,S)-6.

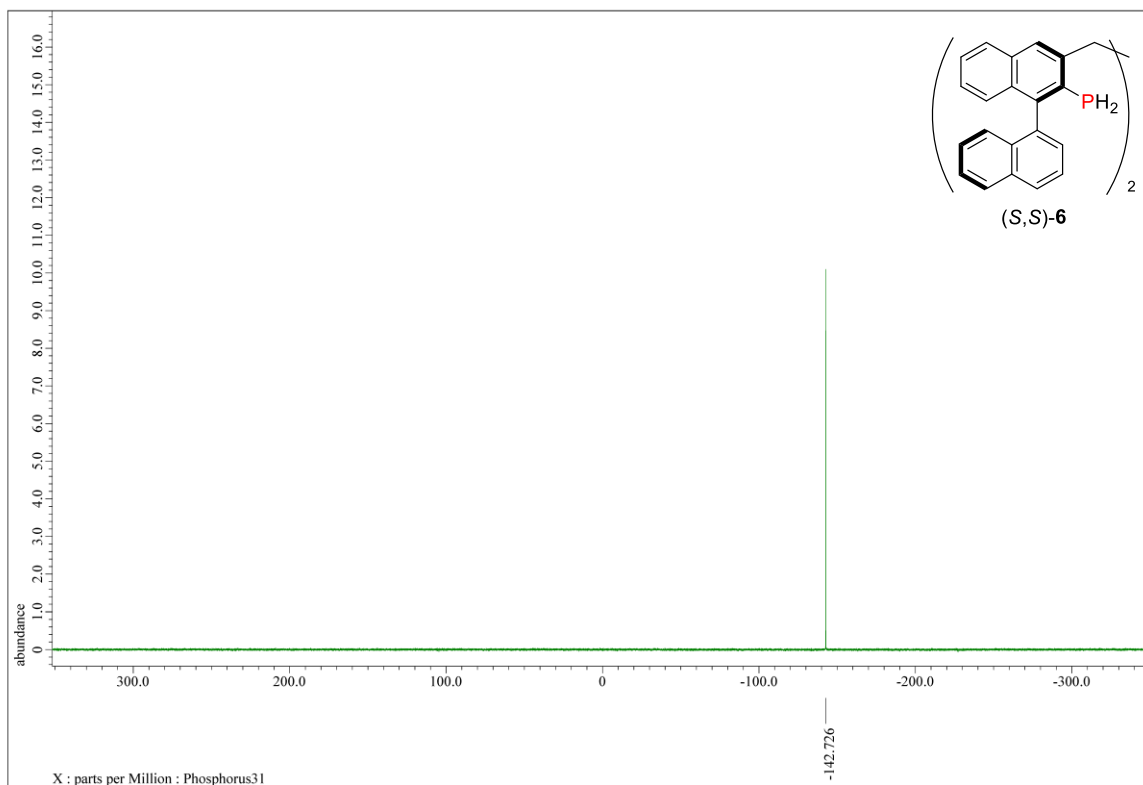

Figure S9.  $^{31}\text{P}$  NMR Spectrum of (S,S)-6.

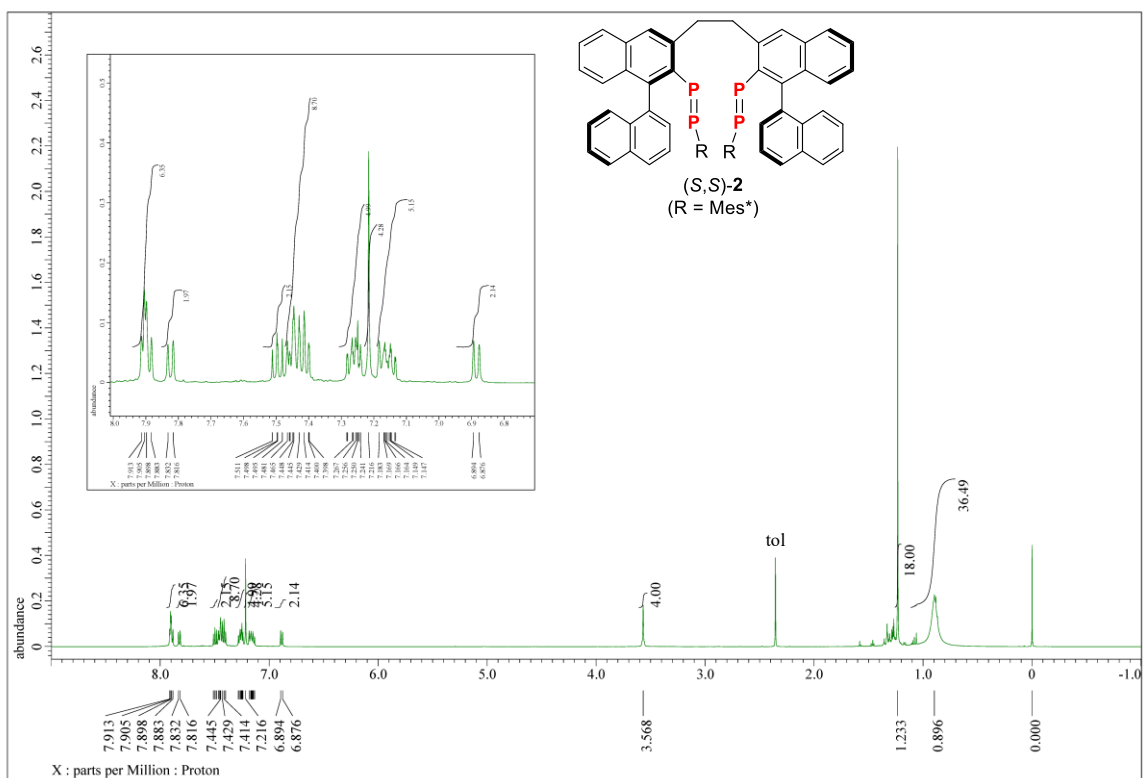

Figure S10.  $^1\text{H}$  NMR Spectrum of (S,S)-2.

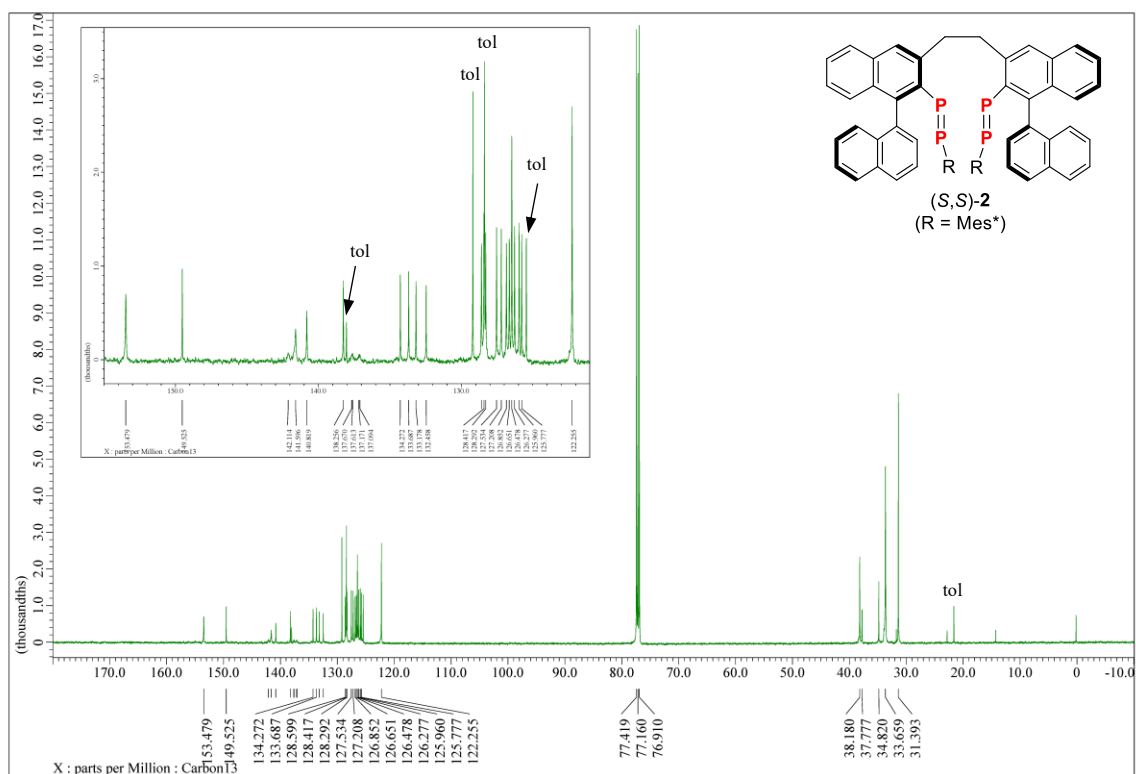

Figure S11. <sup>13</sup>C NMR Spectrum of (S,S)-2.

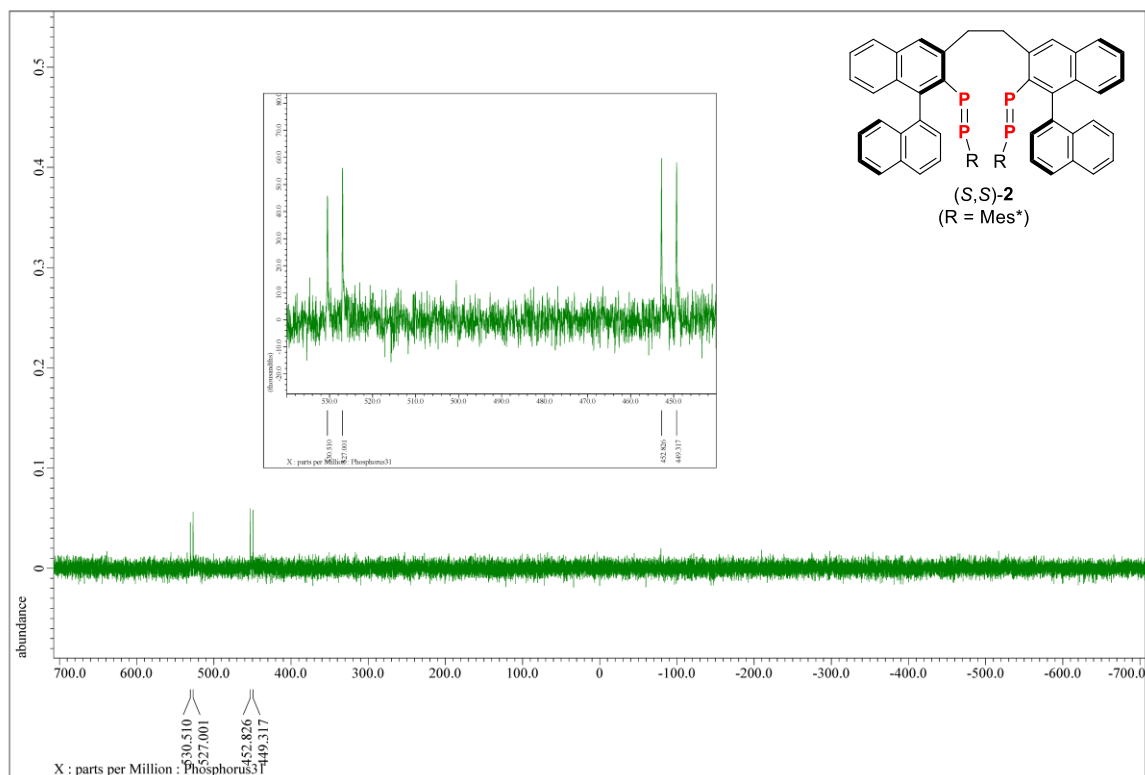

Figure S12. <sup>31</sup>P NMR Spectrum of (S,S)-2.

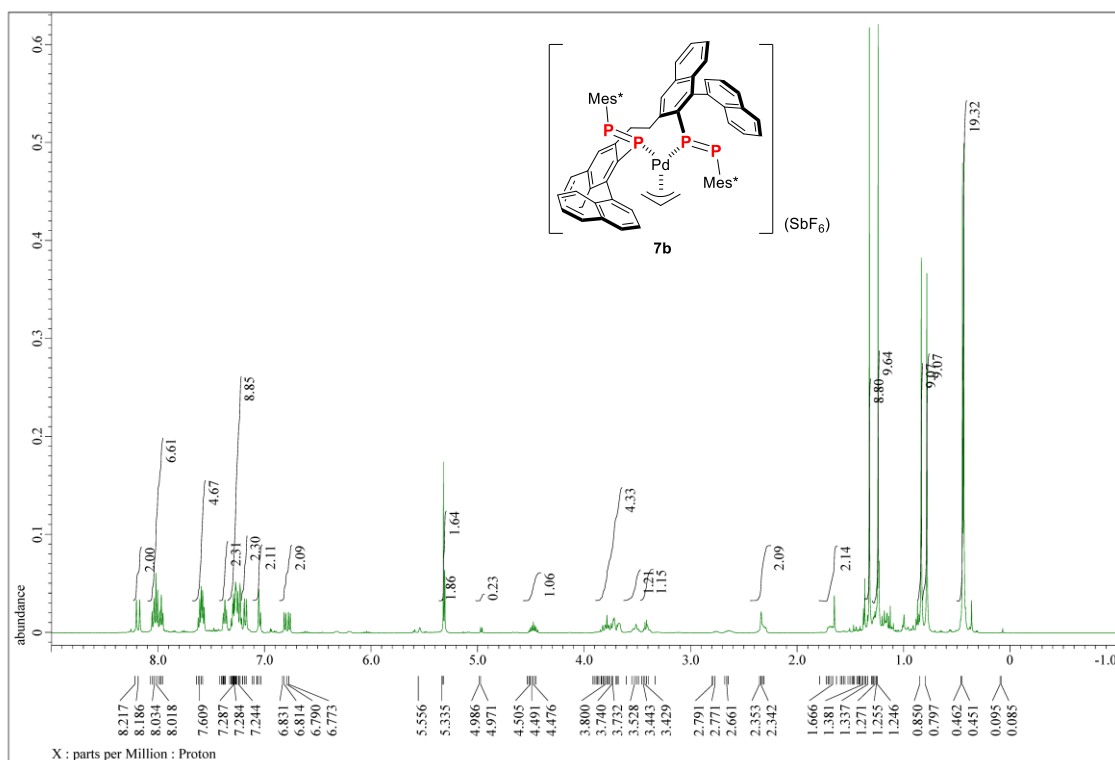

Figure S13.  $^1H$  NMR Spectrum of Palladium complex 7b (allyl).

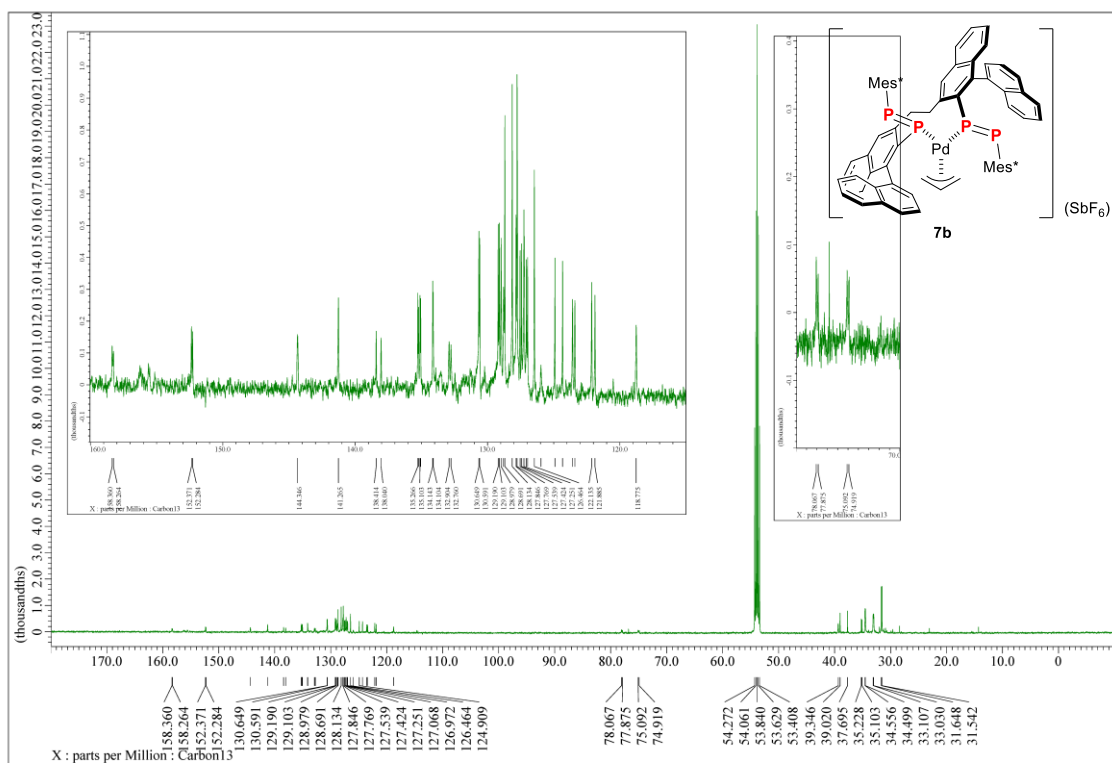

Figure S14.  $^{13}C$  NMR Spectrum of Palladium Complex 7b.

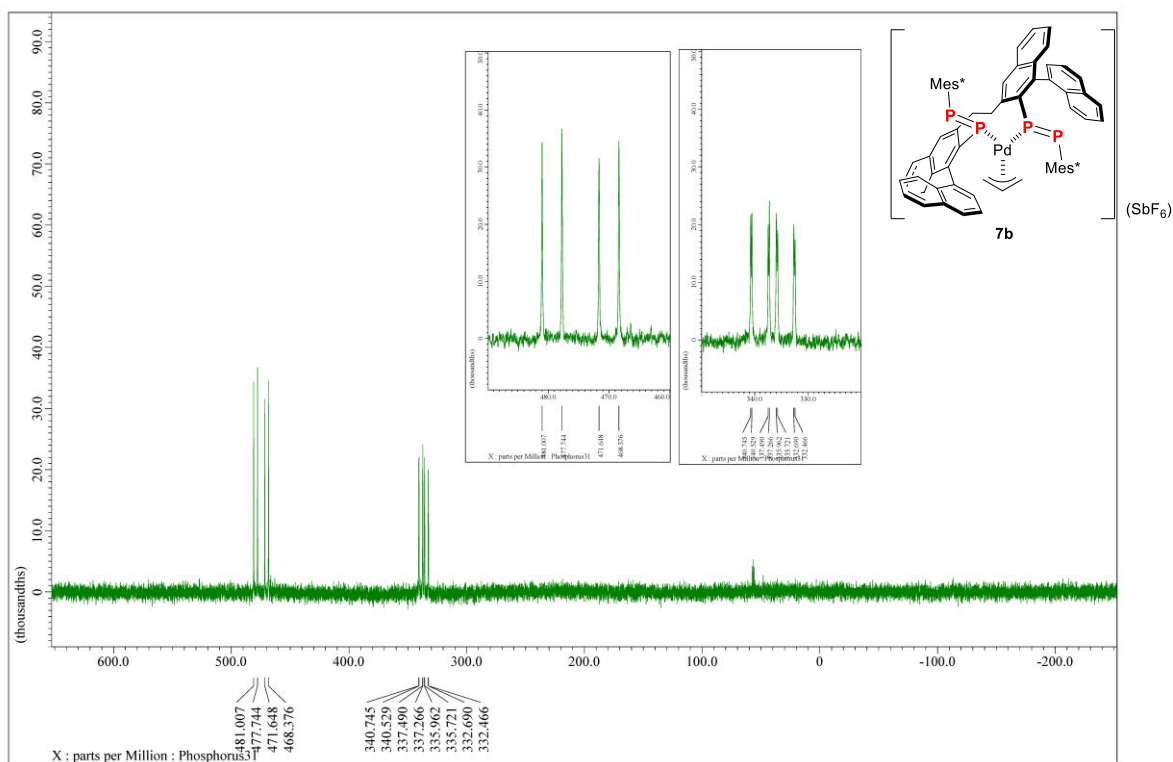

Figure S15.  $^{31}\text{P}$  NMR Spectrum of Palladium Complex 7b.

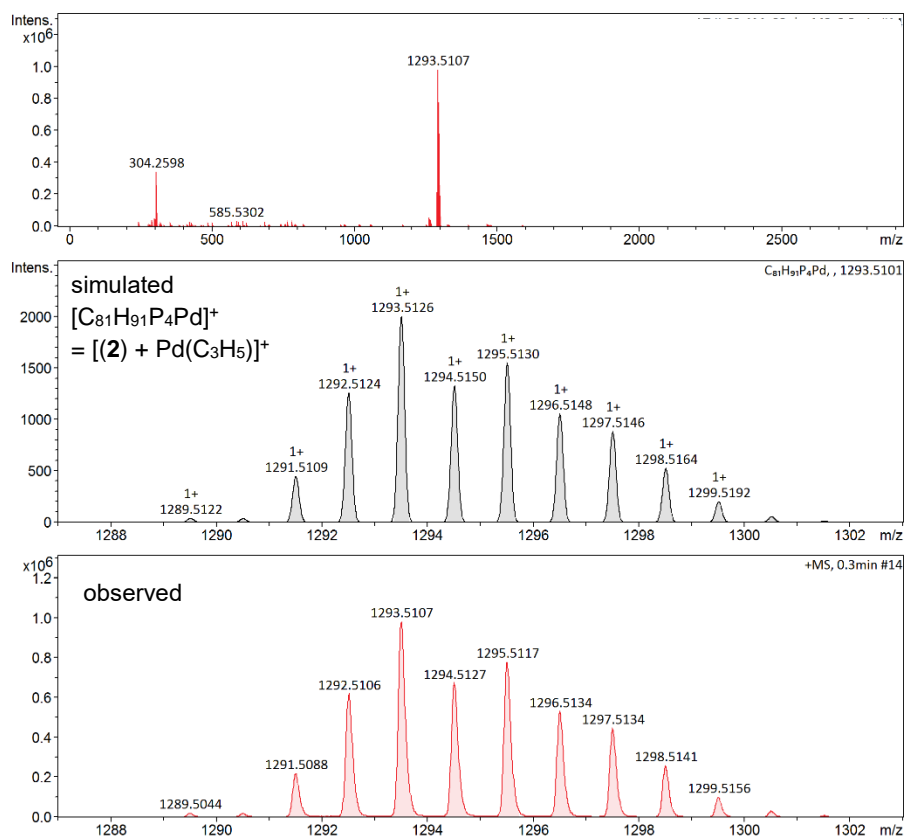

Figure S16. ESI-MS spectra (positive mode) of palladium complex of 7b in THF solution.

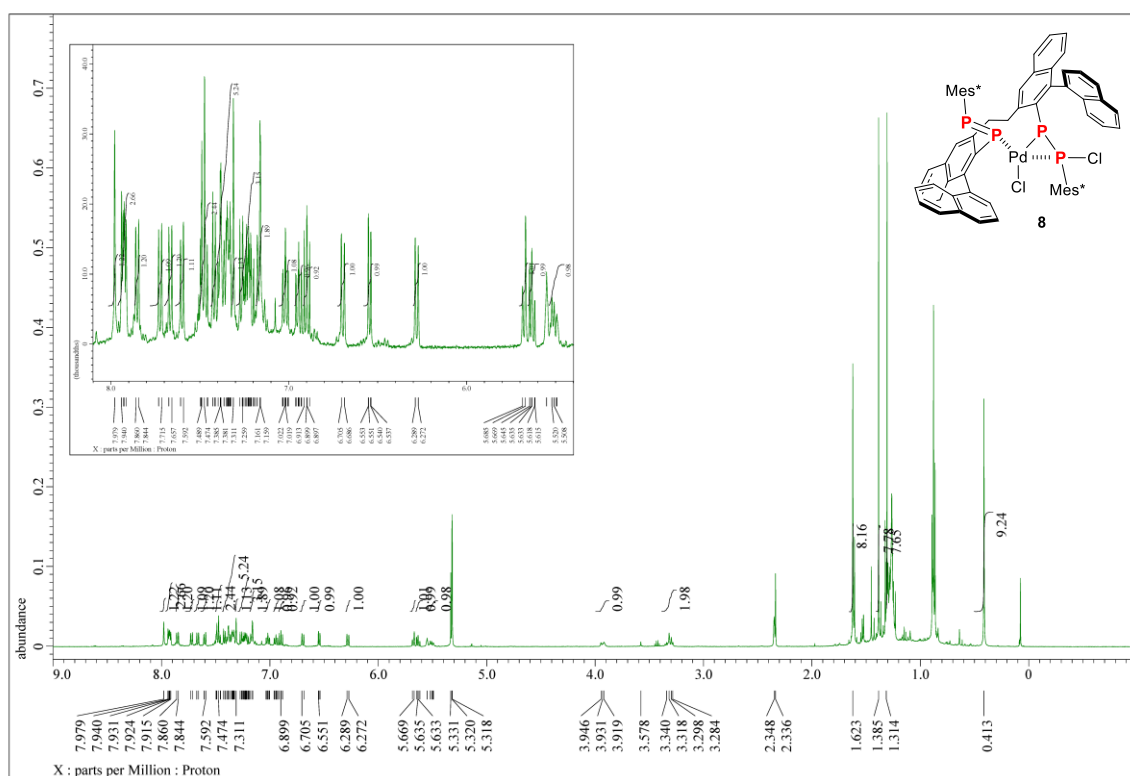

Figure S17. <sup>1</sup>H NMR Spectrum of Palladium Complex 8.

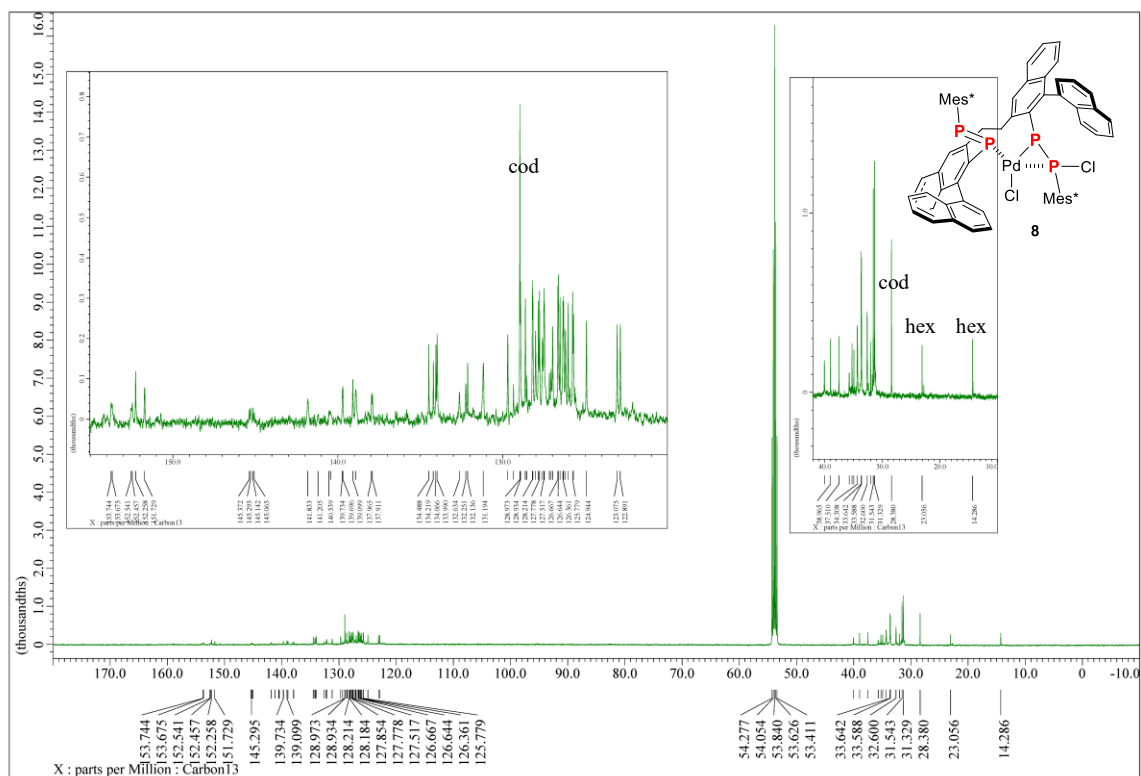

Figure S18. <sup>13</sup>C NMR Spectrum of Palladium Complex 8.

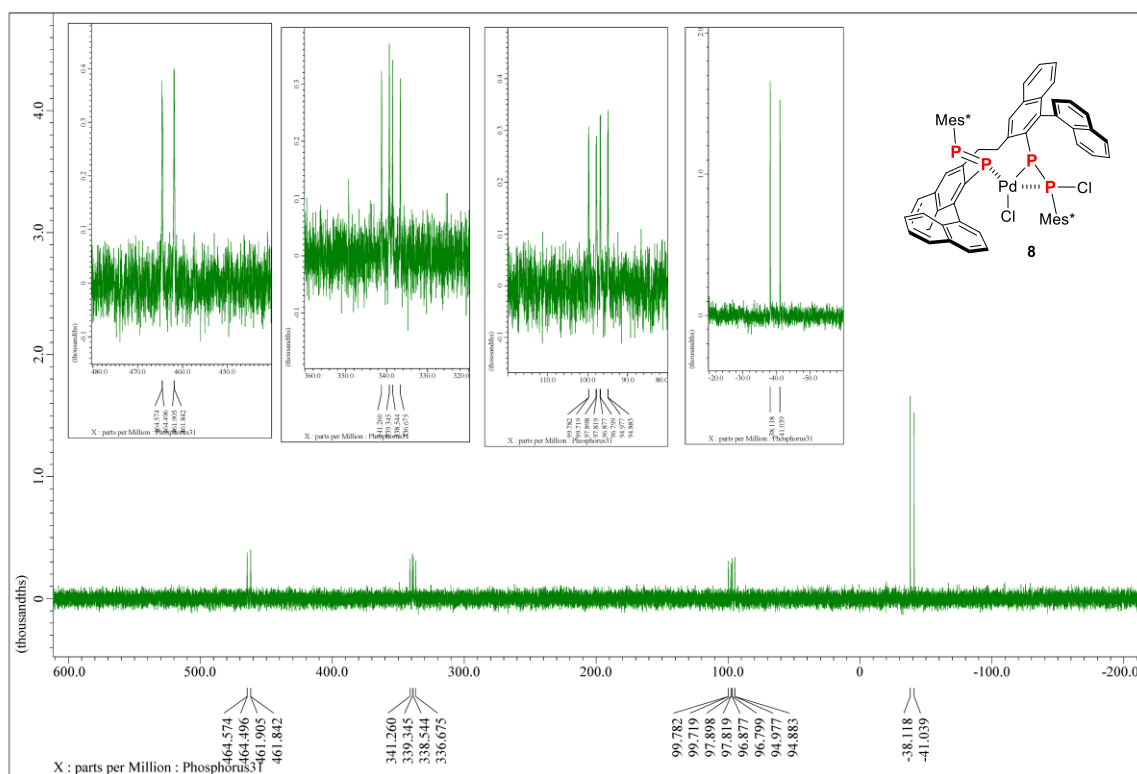

Figure S19.  $^{31}\text{P}$  NMR Spectrum of Pd complex 8.

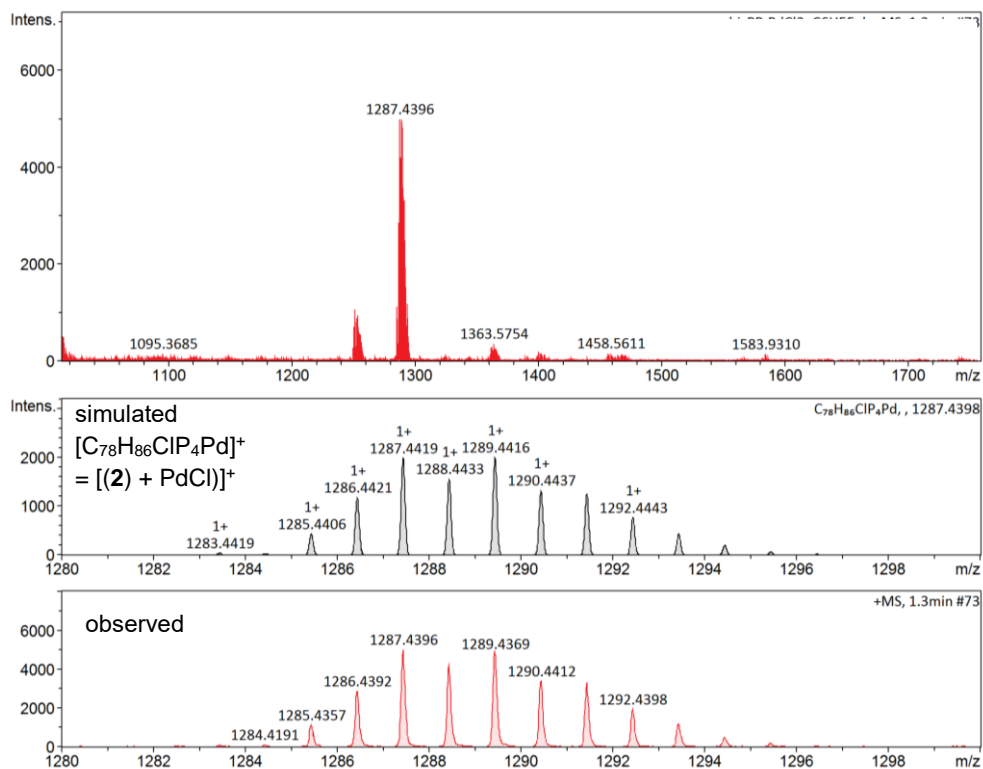

Figure S20. ESI-MS Spectra (positive mode) of Palladium complex of 8 in  $\text{C}_6\text{H}_5\text{F}$  solution.



### 3. Temperature dependent NMR spectra

#### 3-1. Temperature dependent $^1\text{H}$ NMR spectra of **8**.

In the  $^1\text{H}$  NMR spectrum of complex **8** in a  $\text{CD}_2\text{Cl}_2$  solution at room temperature, four of six *t*-butyl signals were observed as the sharp singlet signals whereas two signals assignable to *ortho* position of one of Mes\* groups were not observed. We have already confirmed that two *tert*-butyl groups at *ortho*-position of Mes\* group were observed as the non-equivalent signals in diphosphene complexes **2** and **7b** whereas those of free diphosphenes **1** and **2** were observed as broad equivalent signals. These results indicate the restricted rotation around P–C(Mes\*) bond in both cases. One of P–C(Mes\*) bonds in complex **8** should be rotated at a NMR time scale. To confirm the possibility to the frozen rotation at low temperature, the valuable  $^1\text{H}$  NMR spectra were measured in a  $\text{CD}_2\text{Cl}_2$  solution. The result was shown in Figure S21. After cooling a  $\text{CD}_2\text{Cl}_2$  solution, two *tert*-butyl signals (red squares) were additionally observed along with the others observed initially (blue circles).

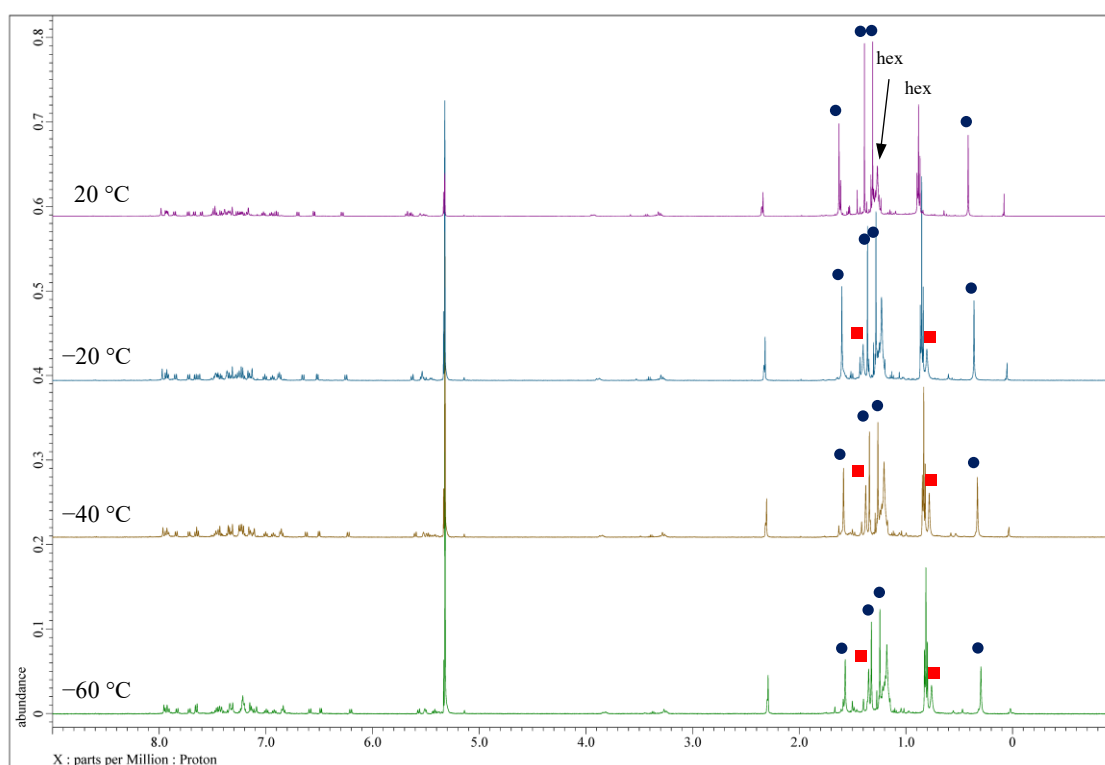

**Figure S21.** Temperature dependent  $^1\text{H}$  NMR spectra (500 MHz) of **8** in  $\text{CD}_2\text{Cl}_2$ .

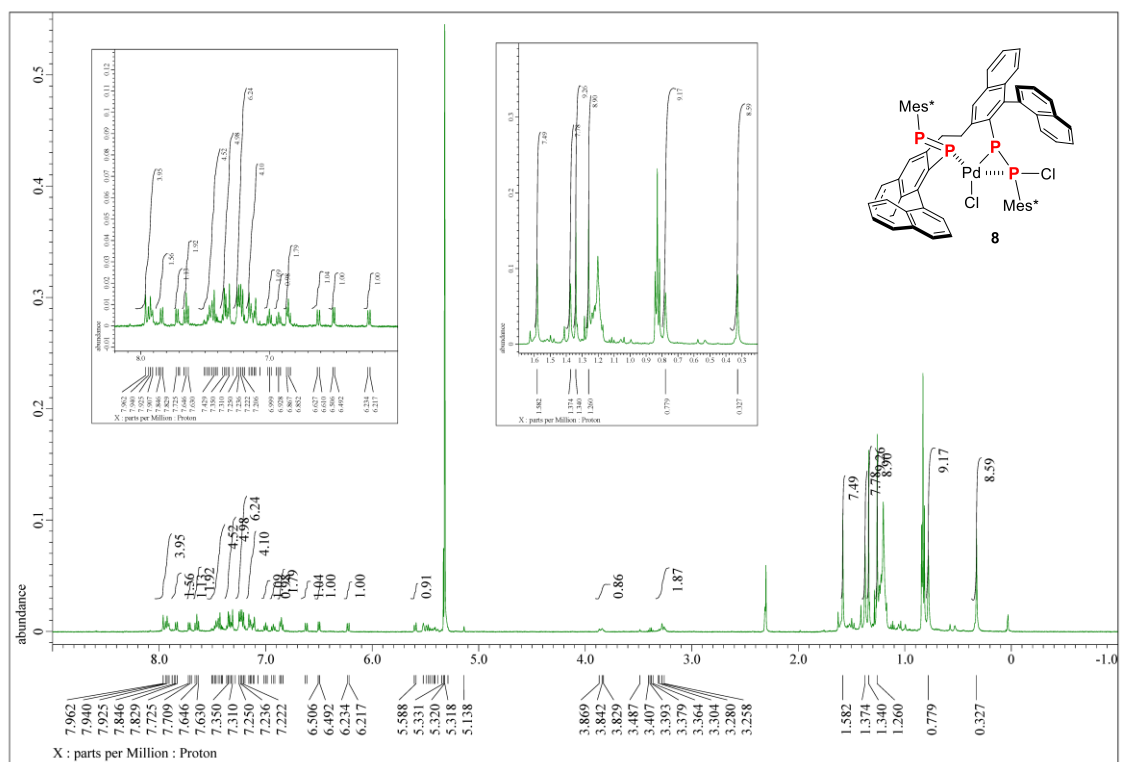

Figure S22.  $^1\text{H}$  NMR spectrum (500 MHz) of **8** in  $\text{CD}_2\text{Cl}_2$  at  $-40\text{ }^\circ\text{C}$ .

### 3-2. The monitoring of the reaction of (*S,S*)-**2** and PdCl<sub>2</sub>(cod) to form **8** in the <sup>31</sup>P NMR spectra.

Bis(diphosphene) (*S,S*)-**2** (3.0 mg, 2.6 μmol) and PdCl<sub>2</sub>(cod) (0.7 mg, 2.5 μmol) was added to an NMR tube equipped with a J-Young valve in a glovebox filled with an argon, and then CD<sub>2</sub>Cl<sub>2</sub> (0.3 mL) dried over CaH<sub>2</sub> was charged via the vacuum transfer at -196 °C. The NMR tube was directly injected to the precooled (-80 °C) JEOL JNM-ECZ500R spectrometer. The measurements were carried out in order at -60 °C, -40 °C, -20 °C, 0 °C, and 20 °C with 1600 scan times (ca. 57 min). The results were shown in Figure S23. The intensity of the signals derived from (*S,S*)-**2** decreased at -20 °C, indicating that the reaction of (*S,S*)-**2** and PdCl<sub>2</sub>(cod) occurs around -20 °C. The signals derived from complex **8** became major at 0 °C.

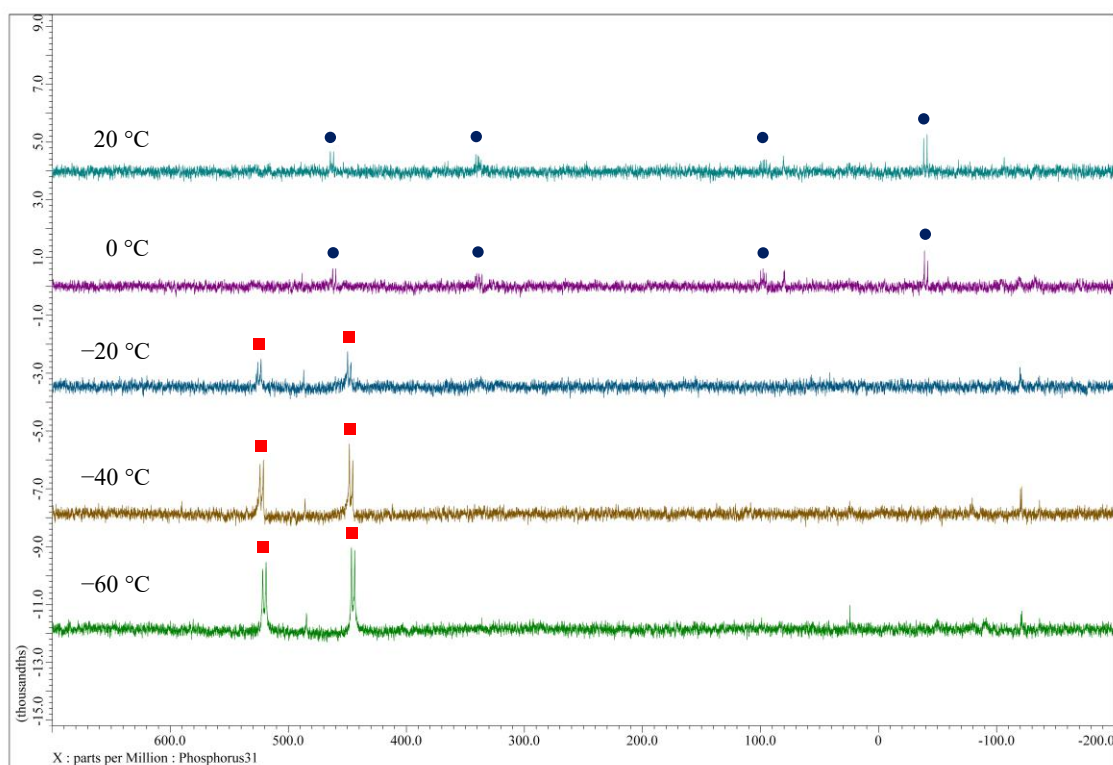

**Figure S23.** Temperature dependent <sup>31</sup>P NMR spectra (500 MHz) of the reaction of (*S,S*)-**2** and PdCl<sub>2</sub>(cod) in CD<sub>2</sub>Cl<sub>2</sub>.

#### 4. X-ray Crystallographic Analysis

Single crystals of (*S,S*)-**2** were grown by recrystallization from a toluene/hexane solution at room temperature. X-ray data were collected on a Rigaku Saturn diffractometer with VariMax multi-layer mirror monochromated Mo-K $\alpha$  radiation ( $\lambda = 0.71073$  Å) at  $-170$  °C (for (*S,S*)-**2**). The data were corrected for Lorentz and polarization effects. An empirical absorption correction based on the multiple measurement of equivalent reflections was applied using the REQABS program in CrystalClear software. The structures were solved by direct methods (SIR2014<sup>S7</sup>) and refined by full-matrix least squares against  $F^2$  using all data. Non-hydrogen atoms were refined anisotropically, while all hydrogen atoms were generated by AFIX instructions. All calculations were performed using Yadokari-XG 2009<sup>S8</sup> software package except for refinement, which was performed using SHELXL-2013.<sup>S9</sup>

Crystal data for (*S,S*)-**2** (CCDC-2121271): Crystal Size,  $0.27 \times 0.21 \times 0.17$  mm; Molecular formula;  $C_{78}H_{86}P_4 \cdot 2(C_8H_7)$ ; Molecular weight,  $M = 1331.61$ ;  $T = -750$  °C; triclinic;  $P1$  (#1);  $a = 10.603(4)$  Å,  $b = 13.870(5)$  Å,  $c = 13.974(5)$  Å,  $\alpha = 101.884(4)^\circ$ ,  $\beta = 96.491(2)^\circ$ ,  $\gamma = 105.675(2)^\circ$ ,  $V = 1904.9(11)$  Å<sup>3</sup>,  $Z = 1$ ,  $D_{\text{calc}} = 1.161$  g cm<sup>-3</sup>,  $\mu = 0.145$  cm<sup>-1</sup>,  $2\theta_{\text{max}} = 55.0^\circ$ , 19605 measured reflections, 14949 independent reflections [ $R_{\text{int}} = 0.0241$ ], 885 refined parameters, Completeness to  $\theta = 98.1\%$ ,  $R_1 = 0.0373$  [ $I > 2\sigma(I)$ ],  $wR_2 = 0.0966$  (all data), GOF = 1.018, largest diff. peak/hole 0.256/ $-0.215$  e.Å<sup>-3</sup>. Absolute Structural Parameter 0.01(3).

**Table S1.** Selected Bond Lengths (Å) and Bond Angles (deg) of diphosphenes **1** and **2**.

| structural parameter                                   | ( <i>S,S</i> )- <b>2</b> | <i>rac</i> - <b>1</b> <sup>a</sup> | ( <i>S</i> )- <b>1</b> <sup>a</sup> |
|--------------------------------------------------------|--------------------------|------------------------------------|-------------------------------------|
| $d(\text{P-P}) / \text{Å}$                             | 2.0388(12), 2.0355(13)   | 2.0323(6)                          | 2.0351(7)                           |
| $d(\text{P-C}_{\text{Np}}) / \text{Å}$                 | 1.855(3), 1.850(3)       | 1.8523(13)                         | 1.853(2)                            |
| $d(\text{P-C}_{\text{Mes}^*}) / \text{Å}$              | 1.858(3), 1.863(3)       | 1.8565(13)                         | 1.8643(19)                          |
| $\text{deg}(\text{C}_{\text{Np}}\text{-P-P}) / ^\circ$ | 99.33(9), 104.66(9)      | 98.59(4)                           | 102.64(6)                           |
| $\text{deg}(\text{P-P-C}_{\text{Mes}^*}) / ^\circ$     | 98.21(9), 97.03(9)       | 103.07(4)                          | 97.72(6)                            |
| (Naph)-(Naph) / $^\circ$ <sup>b</sup>                  | 79.15(5), 89.93(6)       | 79.41(3)                           | 82.56(3)                            |
| (CPP)-(Naph) / $^\circ$ <sup>c</sup>                   | 75.73(5), 61.46(6)       | 76.96(3)                           | 86.64(5)                            |
| (CPP)-(Mes*) / $^\circ$ <sup>d</sup>                   | 85.79(7), 88.72(8)       | 89.13(4)                           | 81.39(5)                            |

a) Ref S1. b) Dihedral angles between the two naphthyl rings. c) Dihedral angles between the CPP plane containing the C<sub>Np</sub> atom and the naphthyl ring. d) Dihedral angles between the CPP plane containing the C<sub>Mes\*</sub> atom and the benzene ring of the Mes\* groups.

## 5. Theoretical Calculations

All theoretical calculations were performed using the Gaussian 09<sup>S10</sup> and GRRM14<sup>S11</sup> programs on a NEC LX 110Rh-1 system of the Research Center for Computational Science, Japan. All structures were optimized without any symmetry assumptions, and zero-point energy, enthalpy, and Gibbs free energy at 298.15 K and 1 atm were estimated. Harmonic vibration frequency calculations at the same level were performed to verify all stationary points as local minima (with no imaginary frequency) or transition states (with one imaginary). The local minima of palladium complexes **7<sup>+</sup>**, **7b**, and **8** were optimized at an M06 functional<sup>S12</sup> with the basis set of SDD<sup>S13</sup> (Pd,Sb) and 6-31G(d) (other atoms) level of theory in conjunction with PCM model (dichloromethane)<sup>S14</sup> with or without Grimme's D3 dispersion correction.<sup>S15</sup> NBO calculations<sup>S16</sup> were carried out at a PBE0 functional<sup>S17</sup> with the basis set of SDD<sup>S13</sup> (Pd) and 6-311+G(d) level (other atoms) in conjunction with PCM model (dichloromethane).<sup>S14</sup>

### 5-1. Optimization of Local Minima of Palladium Complexes of **7<sup>+</sup>** and **7b**.

The possible structures of palladium complexes **7<sup>+</sup>** are shown in Figures S24 and S25. The anions, NaBAr<sup>F</sup><sub>4</sub> (Ar<sup>F</sup> = 3,5-(CF<sub>3</sub>)<sub>2</sub>C<sub>6</sub>H<sub>3</sub>) or SbF<sub>6</sub><sup>-</sup>, were not included for the optimization of **7<sup>+</sup>**. Other conformations except for the  $\eta^1$  coordination of both the P=P moieties were not considered on the basis of the observed <sup>31</sup>P chemical shifts of **7a** and **7b**. P<sub>BNp</sub> and P<sub>Mes\*</sub> represent the phosphorus atom of binaphthyl and Mes\* groups coordinates to a palladium atom, respectively. The *syn* or *anti* configuration represents the orientation of P atom (pink circle with a white character) and benzene ring **R** (red) in the naphthyl group at 1-position in binaphthyldiphosphene. The *anti* or *gauche* conformation represents the orientation of two binaphthyl groups tethered by the ethylene (C<sub>2</sub>H<sub>4</sub>) moiety. The optimization of complex **7b** was carried out in the combination of the conformer **7A<sup>+</sup>** and SbF<sub>6</sub><sup>-</sup>, which was located at the proximity of the  $\pi$ -allyl group (**X**), ethylene tether (**Y**), and the P=P moiety (**Z**). The optimized structures of **7b<sub>X</sub>** to **7b<sub>Z</sub>** were shown in Figure S26.

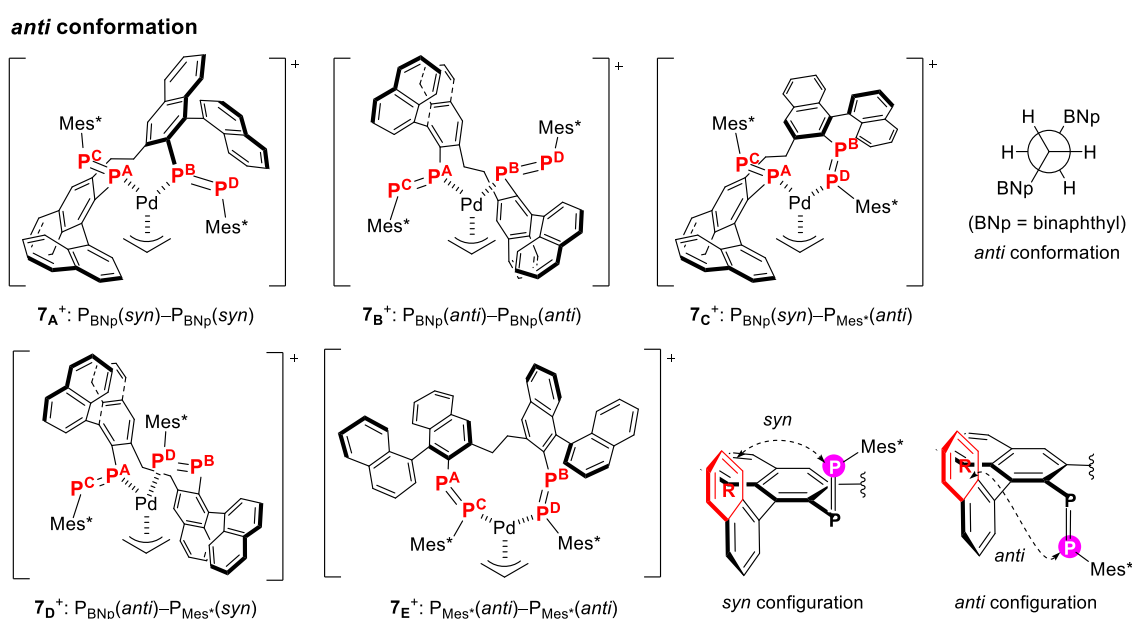

Figure S24. Optimized Structure of **7<sub>A</sub><sup>+</sup>** to **7<sub>E</sub><sup>+</sup>** with the *anti* conformation.

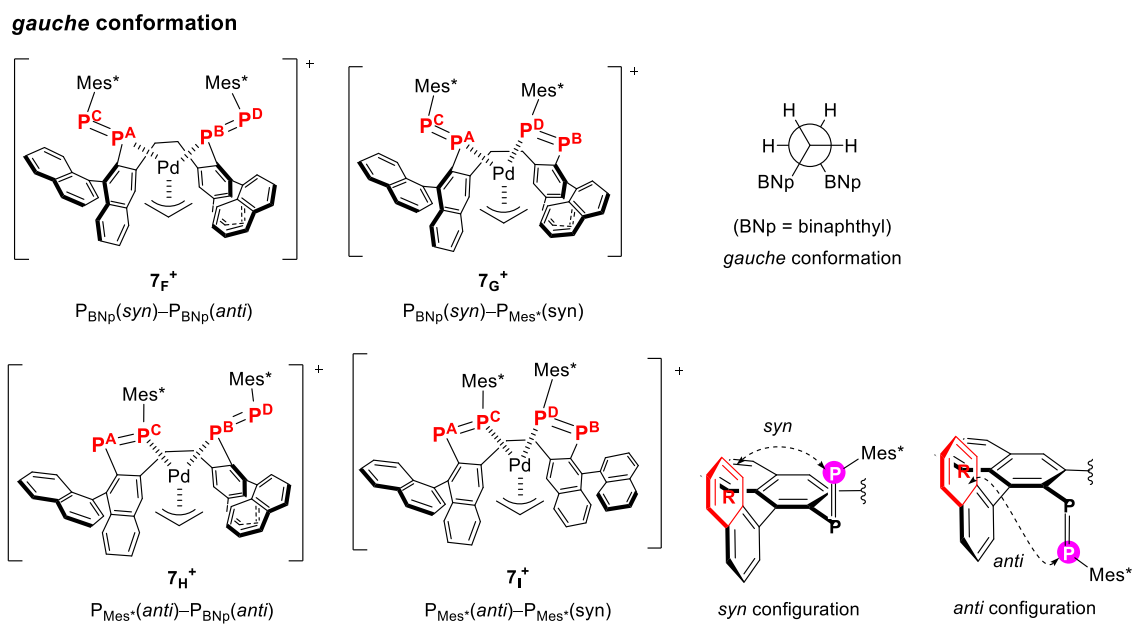

**Figure S25.** Optimized Structure of  $7_F^+$  to  $7_I^+$  with the *gauche* conformation.

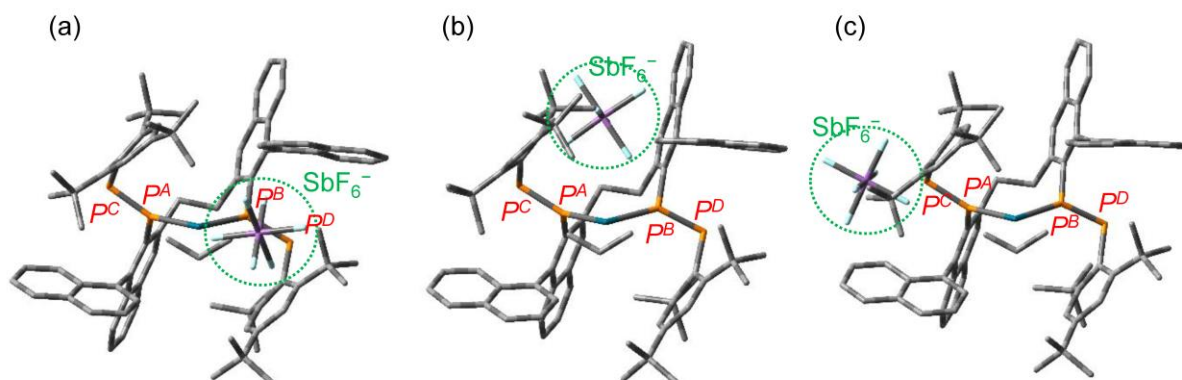

**Figure S26.** Optimized Structures of (a)  $7b_X$ , (b)  $7b_Y$ , and (c)  $7b_Z$ . Color code: Pd, blue; Sb, purple; P, orange; F, light-blue; and C, gray. Hydrogen atoms were omitted for clarity.

**Table S2.** Uncorrected and thermal-corrected (298 K) energies of stationary points (Hartree).<sup>a</sup>

| Structure                                                                  | $E$            | $E + ZPE$    | $H$          | $G$          | $\Delta G^b$ |
|----------------------------------------------------------------------------|----------------|--------------|--------------|--------------|--------------|
| Local minimum optimized at M06/SDD (Pd) and 6-31G(d) (P, C, H) level       |                |              |              |              |              |
| <i>anti</i> conformer                                                      |                |              |              |              |              |
| $7A^+$                                                                     | -4632.07070813 | -4630.567789 | -4630.483032 | -4630.680611 | 0.0          |
| $7B^+$                                                                     | -4632.06569516 | -4630.562908 | -4630.478063 | -4630.675721 | 3.1          |
| $7C^+$                                                                     | -4632.05002565 | -4630.547100 | -4630.462043 | -4630.661358 | 12.1         |
| $7D^+$                                                                     | -4632.04652534 | -4630.542771 | -4630.458118 | -4630.654531 | 16.4         |
| $7E^+$                                                                     | -4632.03286472 | -4630.529023 | -4630.443972 | -4630.645626 | 22.0         |
| <i>gauche</i> conformer                                                    |                |              |              |              |              |
| $7F^+$                                                                     | -4632.06042039 | -4630.558128 | -4630.473350 | -4630.672219 | 5.3          |
| $7G^+$                                                                     | -4632.05114601 | -4630.547100 | -4630.462807 | -4630.658913 | 13.6         |
| $7H^+$                                                                     | -4632.04395729 | -4630.540015 | -4630.455541 | -4630.652569 | 17.6         |
| $7I^+$                                                                     | -4632.02393872 | -4630.520175 | -4630.435100 | -4630.635863 | 28.1         |
| Local minimum optimized at M06/SDD (Pd,Sb) and 6-31G(d) (P, F, C, H) level |                |              |              |              |              |
| $7b_X$                                                                     | -5236.65958598 | -5235.144362 | -5235.048664 | -5235.271945 | 0.0          |
| $7b_Y$                                                                     | -5236.65305197 | -5235.137258 | -5235.041571 | -5235.265403 | 4.1          |
| $7b_Z$                                                                     | -5236.64982625 | -5235.131297 | -5235.036534 | -5235.255643 | 10.2         |
| Local minimum optimized at M06-D3/SDD (Pd) and 6-31G(d) (P, C, H) level    |                |              |              |              |              |
| <i>anti</i> conformer                                                      |                |              |              |              |              |
| $7A^+$                                                                     | -4632.15110266 | -4630.648152 | -4630.563208 | -4630.761476 | 0.0          |
| $7B^+$                                                                     | -4632.14622479 | -4630.642984 | -4630.558233 | -4630.755231 | 3.9          |
| $7C^+$                                                                     | -4632.12463178 | -4630.621283 | -4630.536340 | -4630.735296 | 16.4         |
| $7D^+$                                                                     | -4632.12757574 | -4630.623333 | -4630.538679 | -4630.735229 | 16.5         |
| $7E^+$                                                                     | -4632.10730671 | -4630.603756 | -4630.518670 | -4630.719825 | 26.1         |
| <i>gauche</i> conformer                                                    |                |              |              |              |              |
| $7F^+$                                                                     | -4632.14106127 | -4630.637921 | -4630.553446 | -4630.749734 | 7.4          |
| $7G^+$                                                                     | -4632.12974973 | -4630.625879 | -4630.541373 | -4630.738620 | 14.3         |
| $7H^+$                                                                     | -4632.12132904 | -4630.617823 | -4630.533198 | -4630.731393 | 18.9         |
| $7I^+$                                                                     | -4632.09712449 | -4630.592730 | -4630.507847 | -4630.707661 | 33.8         |

a)  $E$ : electronic energy;  $ZPE$ : zero-point energy;  $H (= E + ZPE + E_{vib} + E_{rot} + E_{trans} + RT)$ : sum of electronic and thermal enthalpies;  $G (= H - TS)$ : sum of electronic and thermal free energies. b) kcal mol<sup>-1</sup>

## 5-2. Optimization of Local Minima of Palladium Complexes of **8** and Investigation on the Reaction Pathway of the Formation of Palladium complex **8<sub>A</sub>** and **8<sub>B</sub>**.

The possible structures of palladium complexes **8** are shown in Figure S27. The P=P and the [P–P(Cl)]<sup>−</sup> moieties coordinate to a palladium atom in  $\eta^1$  and  $\eta^2$  fashions, respectively, in **8<sub>A</sub>** to **8<sub>D</sub>** and **8<sub>F</sub>** to **8<sub>I</sub>**, whereas both the P=P moieties coordinate to a palladium atom in  $\eta^1$  fashions in **8<sub>E</sub>** and **8<sub>J</sub>**. The transition states were initially searched at B3LYP<sup>S18</sup> or M06<sup>S12</sup> functionals with the basis set of LanL2DZ<sup>S19</sup> (Pd), 6-31G(d) (P, Cl), and 3-21G (C, H) levels. The transition states were verified by IRC calculations at the same level. The obtained structures were reoptimized at M06/SDD (Pd) and 6-31G(d) (P, Cl, C, H) in conjunction with PCM model (dichloromethane). Harmonic vibration frequency calculations at the same level were performed to verify all stationary points as local minima (with no imaginary frequency) or transition states (with one imaginary). Single point calculations were carried out at M06/SDD (Pd) and 6-311G(d,p) (P, Cl, C, H) in conjunction with PCM model (dichloromethane).

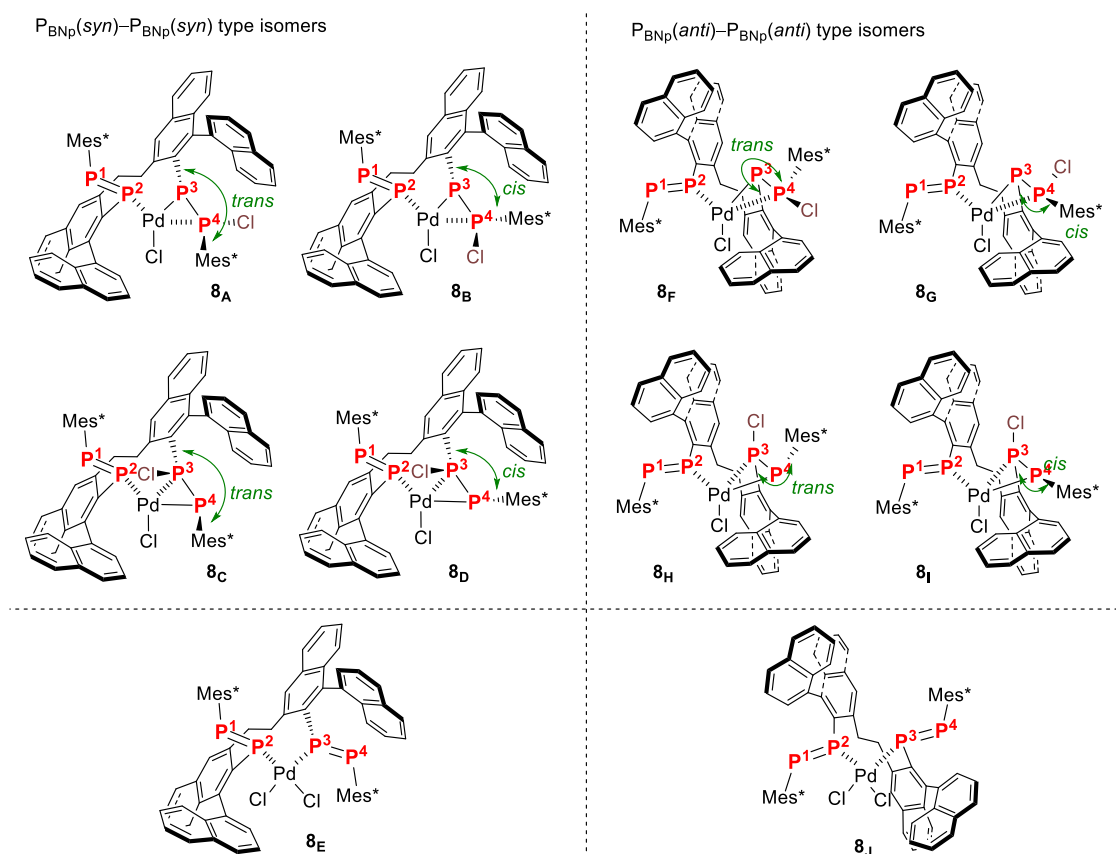

Figure S27. Optimized Structures of **8<sub>A</sub>** to **8<sub>J</sub>**.



**Table S3.** Uncorrected and thermal-corrected (298 K) energies of stationary points (Hartree).<sup>a</sup>

| M06/SDD (Pd) and 6-31G(d) (P, Cl, C, H) level of theory    |                |                |                |              |              |
|------------------------------------------------------------|----------------|----------------|----------------|--------------|--------------|
| Structure                                                  | $E$            | $E + ZPE$      | $H$            | $G$          | $\Delta G^b$ |
| Local minimum                                              |                |                |                |              |              |
| <b>8<sub>A</sub></b>                                       | -5435.40021436 | -5433.970478   | -5433.884494   | -5434.087955 | 0.0          |
| <b>8<sub>B</sub></b>                                       | -5435.39912071 | -5433.968891   | -5433.883141   | -5434.085570 | 1.5          |
| <b>8<sub>C</sub></b>                                       | -5435.39297301 | -5433.962795   | -5433.876845   | -5434.081827 | 3.9          |
| <b>8<sub>D</sub></b>                                       | -5435.38268692 | -5433.953120   | -5433.866971   | -5434.072452 | 9.7          |
| <b>8<sub>E</sub></b>                                       | -5435.39875730 | -5433.967041   | -5433.881671   | -5434.082189 | 3.6          |
| <b>8<sub>F</sub></b>                                       | -5435.37895628 | -5433.948575   | -5433.862618   | -5434.066358 | 13.6         |
| <b>8<sub>G</sub></b>                                       | -5435.38366336 | -5433.954664   | -5433.868150   | -5434.074870 | 8.2          |
| <b>8<sub>H</sub></b>                                       | -5435.38976265 | -5433.959249   | -5433.873649   | -5434.075825 | 7.6          |
| <b>8<sub>I</sub></b>                                       | -5435.37912346 | -5433.948484   | -5433.862671   | -5434.065761 | 13.9         |
| <b>8<sub>J</sub></b>                                       | -5435.39303731 | -5433.962727   | -5433.876677   | -5434.079572 | 5.3          |
| -----                                                      |                |                |                |              |              |
| <b>Int-1</b>                                               | -5435.39169337 | -5433.962034   | -5433.876483   | -5434.077020 | 6.9          |
| <b>Int-2</b>                                               | -5435.37952664 | -5433.949774   | -5433.863615   | -5434.067587 | 12.9         |
| <b>Int-3<sub>A</sub></b>                                   | -5435.39175510 | -5433.961107   | -5433.875217   | -5434.078038 | 6.2          |
| <b>Int-3<sub>B</sub></b>                                   | -5435.39066077 | -5433.960451   | -5433.874253   | -5434.078595 | 5.9          |
| <b>Int-4<sub>B</sub></b>                                   | -5435.39088502 | -5433.960106   | -5433.874339   | -5434.078205 | 6.1          |
| -----                                                      |                |                |                |              |              |
| Transition state                                           |                |                |                |              |              |
| <b>TS-1</b>                                                | -5435.37549706 | -5433.94708604 | -5433.86150530 | -5434.064174 | 14.9         |
| <b>TS-2</b>                                                | -5435.38086927 | -5433.95166919 | -5433.86627347 | -5434.067484 | 12.9         |
| <b>TS-3<sub>A</sub></b>                                    | -5435.37909868 | -5433.95030089 | -5433.86472663 | -5434.067358 | 12.9         |
| <b>TS-3<sub>B</sub></b>                                    | -5435.37609310 | -5433.94530249 | -5433.86027236 | -5434.061091 | 16.9         |
| <b>TS-4<sub>B</sub></b>                                    | -5435.38254770 | -5433.95304266 | -5433.86739215 | -5434.070760 | 10.8         |
| -----                                                      |                |                |                |              |              |
| M06-D3/SDD (Pd) and 6-31G(d) (P, Cl, C, H) level of theory |                |                |                |              |              |
| Local minimum                                              |                |                |                |              |              |
| <b>8<sub>A</sub></b>                                       | -5435.47534053 | -5434.044537   | -5433.958910   | -5434.160600 | 0.0          |
| <b>8<sub>B</sub></b>                                       | -5435.47874826 | -5434.047562   | -5433.962202   | -5434.162690 | -1.3         |
| <b>8<sub>C</sub></b>                                       | -5435.46520695 | -5434.034789   | -5433.948925   | -5434.153345 | 4.6          |
| <b>8<sub>D</sub></b>                                       | -5435.45518477 | -5434.025304   | -5433.939333   | -5434.144212 | 10.3         |
| <b>8<sub>E</sub></b>                                       | -5435.47569606 | -5434.044414   | -5433.959005   | -5434.159285 | 0.8          |
| <b>8<sub>F</sub></b>                                       | -5435.45297083 | -5434.021772   | -5433.936057   | -5434.138285 | 14.0         |
| <b>8<sub>G</sub></b>                                       | -5435.46050505 | -5434.030518   | -5433.944439   | -5434.148203 | 7.8          |
| <b>8<sub>H</sub></b>                                       | -5435.46368701 | -5434.032939   | -5433.947281   | -5434.150653 | 6.2          |
| <b>8<sub>I</sub></b>                                       | -5435.45405456 | -5434.022645   | -5433.937173   | -5434.138703 | 13.7         |
| <b>8<sub>J</sub></b>                                       | -5435.47035097 | -5434.039934   | -5433.953950   | -5434.157224 | 2.1          |
| -----                                                      |                |                |                |              |              |
| <b>Int-1</b>                                               | -5435.47069548 | -5434.040341   | -5433.954990   | -5434.154652 | 3.7          |

|                  |                |              |              |              |      |
|------------------|----------------|--------------|--------------|--------------|------|
| <b>Int-2</b>     | -5435.46327202 | -5434.033084 | -5433.947071 | -5434.150504 | 6.3  |
| <b>Int-3A</b>    | -5435.47049090 | -5434.039087 | -5433.953480 | -5434.155071 | 3.5  |
| <b>Int-3B</b>    | -5435.47119185 | -5434.040458 | -5433.954427 | -5434.158166 | 1.5  |
| <b>Int-4B</b>    | -5435.47189015 | -5434.039969 | -5433.954632 | -5434.154901 | 3.6  |
| Transition state |                |              |              |              |      |
| <b>TS-1</b>      | -5435.45421214 | -5434.025718 | -5433.940204 | -5434.141797 | 11.8 |
| <b>TS-2</b>      | -5435.46036171 | -5434.030515 | -5433.945267 | -5434.146041 | 9.1  |
| <b>TS-3A</b>     | -5435.45527520 | -5434.025226 | -5433.940092 | -5434.140414 | 12.7 |
| <b>TS-3B</b>     | -5435.45696341 | -5434.026573 | -5433.941284 | -5434.144415 | 10.2 |
| <b>TS-4B</b>     | -5435.46255978 | -5434.032909 | -5433.947254 | -5434.150143 | 6.6  |

a)  $E$ : electronic energy;  $ZPE$ : zero-point energy;  $H (= E + ZPE + E_{\text{vib}} + E_{\text{rot}} + E_{\text{trans}} + RT)$ : sum of electronic and thermal enthalpies;  $G (= H - TS)$ : sum of electronic and thermal free energies. b) kcal mol<sup>-1</sup>.

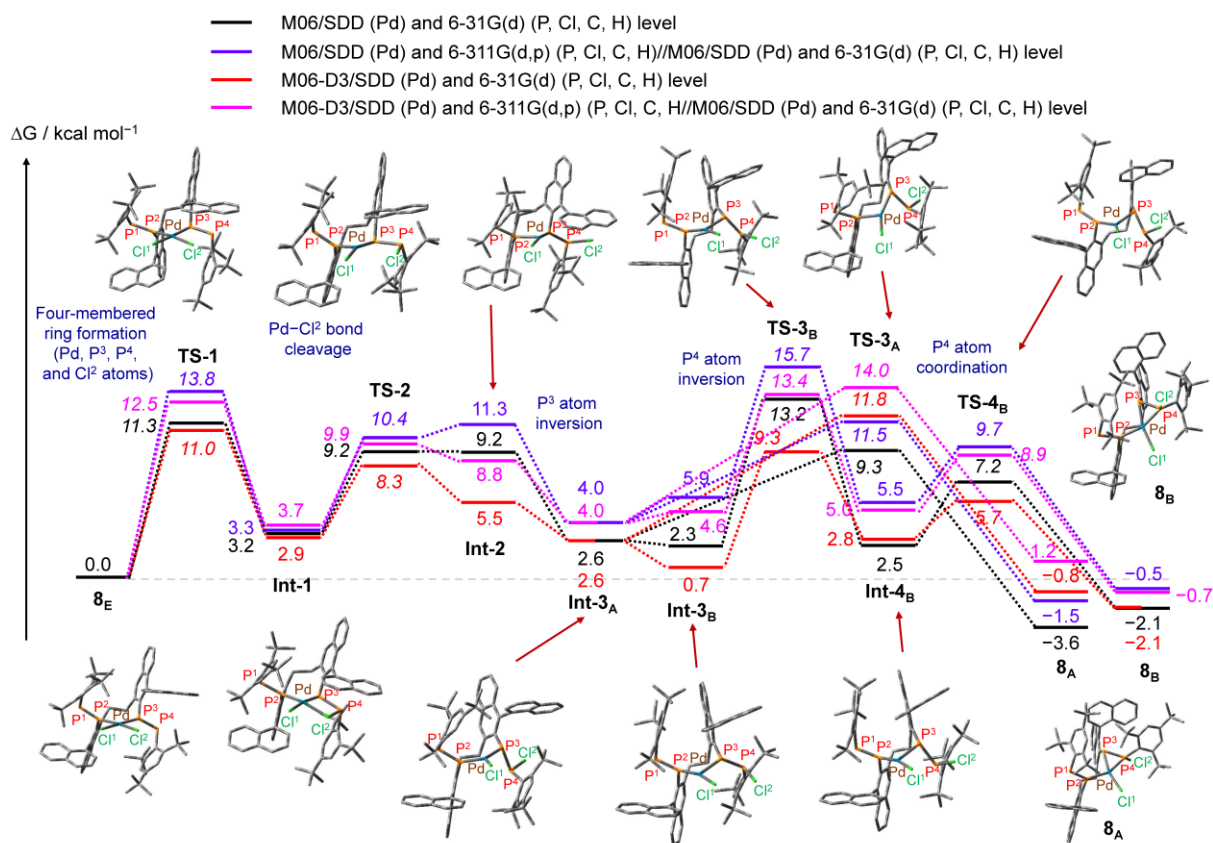

**Figure S28.** Energy profiles for the formation of palladium complexes  $8_A$  and  $8_B$  from  $8_E$  with  $\eta^1$  coordination of both P=P moieties. Color code: Pd, blue; Cl, yellow-green; P, orange; and C, gray. Hydrogen atoms were omitted for clarity.

**Table S4.** Selected Structural Parameters of Palladium Complexes **8<sub>A</sub>**, **8<sub>B</sub>**, **8<sub>E</sub>**, **INT-1** to **Int-4<sub>B</sub>**, and **TS-1** to **TS-4<sub>B</sub>**.

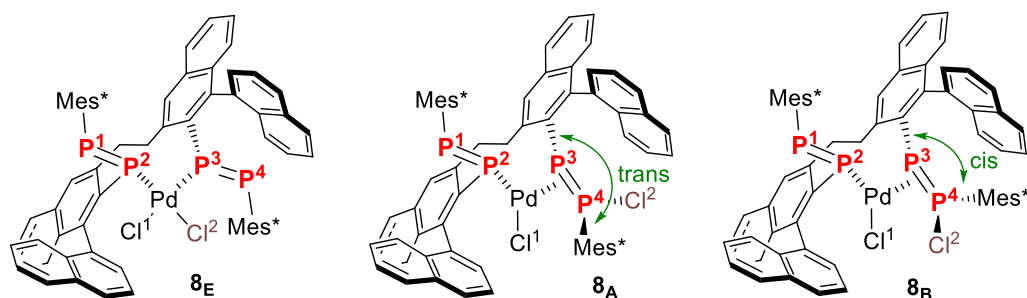

<Bond Lengths>

| Structure                | $d(\text{P}^1\text{-P}^2)$<br>/Å | $d(\text{P}^3\text{-P}^4)$<br>/Å | $d(\text{Pd-P}^2)$<br>/Å | $d(\text{Pd-P}^3)$<br>/Å | $d(\text{Pd-P}^4)$<br>/Å | $d(\text{Pd-Cl}^1)$<br>/Å | $d(\text{Pd-Cl}^2)$<br>/Å | $d(\text{P}^4\text{-Cl}^2)$<br>/Å |
|--------------------------|----------------------------------|----------------------------------|--------------------------|--------------------------|--------------------------|---------------------------|---------------------------|-----------------------------------|
|                          | (WBI) <sup>a</sup>               | (WBI) <sup>a</sup>               | (WBI) <sup>a</sup>       | (WBI) <sup>a</sup>       | (WBI) <sup>a</sup>       | (WBI) <sup>a</sup>        | (WBI) <sup>a</sup>        | (WBI) <sup>a</sup>                |
| <b>8<sub>E</sub></b>     | 2.050<br>(1.71)                  | 2.050<br>(1.71)                  | 2.339<br>(0.42)          | 2.339<br>(0.42)          | — <sup>b</sup>           | 2.376<br>(0.39)           | 2.376<br>(0.39)           | — <sup>b</sup>                    |
| <b>TS-1</b>              | 2.045<br>(1.70)                  | 2.132<br>(1.34)                  | 2.302<br>(0.45)          | 2.351<br>(0.41)          | — <sup>b</sup>           | 2.408<br>(0.36)           | 2.409<br>(0.33)           | 2.998<br>(0.21)                   |
| <b>Int-1</b>             | 2.044<br>(1.69)                  | 2.290<br>(0.93)                  | 2.284<br>(0.46)          | 2.350<br>(0.52)          | — <sup>b</sup>           | 2.452<br>(0.29)           | 2.508<br>(0.19)           | 2.206<br>(0.76)                   |
| <b>TS-2</b>              | 2.052<br>(1.67)                  | 2.292<br>(0.90)                  | 2.300<br>(0.45)          | 2.340<br>(0.55)          | — <sup>b</sup>           | 2.433<br>(0.30)           | 3.414<br>(0.04)           | 2.129<br>(0.87)                   |
| <b>Int-2</b>             | 2.051<br>(1.69)                  | 2.157<br>(1.21)                  | 2.334<br>(0.42)          | 2.342<br>(0.48)          | — <sup>b</sup>           | 2.464<br>(0.26)           | 5.522<br>(0.02)           | 2.174<br>(0.74)                   |
| <b>Int-3<sub>A</sub></b> | 2.050<br>(1.66)                  | 2.243<br>(0.95)                  | 2.270<br>(0.48)          | 2.277<br>(0.65)          | 3.512<br>(0.06)          | 2.435<br>(0.29)           | — <sup>b</sup>            | 2.143<br>(0.82)                   |
| <b>TS-3<sub>A</sub></b>  | 2.049<br>(1.70)                  | 2.188<br>(1.09)                  | 2.343<br>(0.37)          | 2.321<br>(0.59)          | 2.732<br>(0.20)          | 2.430<br>(0.27)           | — <sup>b</sup>            | 2.126<br>(0.81)                   |
| <b>8<sub>A</sub></b>     | 2.040<br>(1.72)                  | 2.216<br>(1.08)                  | 2.359<br>(0.33)          | 2.402<br>(0.45)          | 2.338<br>(0.37)          | 2.437<br>(0.30)           | — <sup>b</sup>            | 2.085<br>(0.87)                   |
| <b>Int-3<sub>B</sub></b> | 2.051<br>(1.70)                  | 2.191<br>(1.12)                  | 2.277<br>(0.43)          | 2.336<br>(0.58)          | 4.086<br>(0.12)          | 2.409<br>(0.33)           | — <sup>b</sup>            | 2.104<br>(0.88)                   |
| <b>TS-3<sub>B</sub></b>  | 2.052<br>(1.68)                  | 2.118<br>(1.23)                  | 2.286<br>(0.43)          | 2.346<br>(0.52)          | 3.629<br>(0.16)          | 2.441<br>(0.30)           | — <sup>b</sup>            | 2.065<br>(0.90)                   |
| <b>Int-4<sub>B</sub></b> | 2.050<br>(1.70)                  | 2.298<br>(0.97)                  | 2.295<br>(0.42)          | 2.346<br>(0.63)          | 3.418<br>(0.04)          | 2.389<br>(0.34)           | — <sup>b</sup>            | 2.143<br>(0.84)                   |
| <b>TS-4<sub>B</sub></b>  | 2.054<br>(1.67)                  | 2.212<br>(1.09)                  | 2.306<br>(0.41)          | 2.304<br>(0.59)          | 2.790<br>(0.15)          | 2.476<br>(0.29)           | — <sup>b</sup>            | 2.119<br>(0.84)                   |
| <b>8<sub>B</sub></b>     | 2.038<br>(1.72)                  | 2.198<br>(1.09)                  | 2.356<br>(0.35)          | 2.434<br>(0.47)          | 2.325<br>(0.37)          | 2.448<br>(0.28)           | — <sup>b</sup>            | 2.104<br>(0.84)                   |

Structures calculated at M06/SDD (Pd) and 6-31G(d) (P, Cl, C, H) level of theory were used. a) Wiberg's bond index. b) Not analyzed

**<Bond Angles>**

| Structure                | Angle<br>(P <sup>2</sup> -Pd-Cl <sup>1</sup> )<br>/deg | Angle<br>(P <sup>2</sup> -Pd-P <sup>3</sup> )<br>/deg | Angle<br>(Pd-P <sup>3</sup> -P <sup>4</sup> )<br>/deg | Σ Angle<br>(Pd)/deg <sup>a</sup> | Σ Angle<br>(P <sup>3</sup> )/deg <sup>b</sup> | Σ Angle<br>(P <sup>4</sup> )/deg <sup>c</sup> |
|--------------------------|--------------------------------------------------------|-------------------------------------------------------|-------------------------------------------------------|----------------------------------|-----------------------------------------------|-----------------------------------------------|
| <b>8<sub>E</sub></b>     | 85.5                                                   | 101.6                                                 | 138.0                                                 | 359.7                            | 359.9                                         | –                                             |
| <b>TS-1</b>              | 91.0                                                   | 90.2                                                  | 107.6                                                 | 358.0                            | 322.9                                         | 267.5                                         |
| <b>Int-1</b>             | 101.0                                                  | 86.6                                                  | 95.6                                                  | 358.9                            | 304.7                                         | 286.2                                         |
| <b>TS-2</b>              | 111.3                                                  | 84.8                                                  | 103.9                                                 | 357.4                            | 310.0                                         | 309.3                                         |
| <b>Int-2</b>             | 98.0                                                   | 85.3                                                  | 132.9                                                 | 354.8                            | 341.5                                         | 341.1                                         |
| <b>Int-3<sub>A</sub></b> | 126.1                                                  | 105.0                                                 | 102.0                                                 | 360.0                            | 330.0                                         | 319.6                                         |
| <b>TS-3<sub>A</sub></b>  | 103.7                                                  | 111.1                                                 | 74.5                                                  | 355.7                            | 307.0                                         | 337.2                                         |
| <b>8<sub>A</sub></b>     | 99.3                                                   | 97.0                                                  | 60.7                                                  | 358.8                            | 274.0                                         | 334.1                                         |
| <b>Int-3<sub>B</sub></b> | 162.5                                                  | 101.6                                                 | 129.0                                                 | 359.9                            | 340.8                                         | 339.4                                         |
| <b>TS-3<sub>B</sub></b>  | 156.4                                                  | 105.8                                                 | 108.7                                                 | 359.8                            | 324.4                                         | 358.2                                         |
| <b>Int-4<sub>B</sub></b> | 164.7                                                  | 103.6                                                 | 94.8                                                  | 359.7                            | 319.6                                         | 320.3                                         |
| <b>TS-4<sub>B</sub></b>  | 136.9                                                  | 102.0                                                 | 76.3                                                  | 357.0                            | 311.1                                         | 332.0                                         |
| <b>8<sub>B</sub></b>     | 93.0                                                   | 103.5                                                 | 60.0                                                  | 359.4                            | 273.6                                         | 340.9                                         |

Structures calculated at M06/SDD (Pd) and 6-31G(d) (P, Cl, C, H) level of theory were used. a) Sum of the bond angles of P<sup>2</sup>-Pd-P<sup>3</sup>, P<sup>2</sup>-Pd-Cl<sup>1</sup>, P<sup>3</sup>-Pd-Cl<sup>1</sup>. b) Sum of the bond angles of Pd-P<sup>3</sup>-P<sup>4</sup>, Pd-P<sup>3</sup>-C<sub>Np</sub>, and P<sup>4</sup>-P<sup>3</sup>-C<sub>Np</sub>. c) Sum of the bond angles of P<sup>3</sup>-P<sup>4</sup>-Cl<sup>2</sup>, P<sup>3</sup>-P<sup>4</sup>-C(Mes\*), and Cl<sup>2</sup>-P<sup>4</sup>-C<sub>Mes\*</sub>.

**<NPA charges>**

| Structure                | Pd     | P <sup>1</sup> | P <sup>2</sup> | P <sup>3</sup> | P <sup>4</sup> | Cl <sup>1</sup> | Cl <sup>2</sup> |
|--------------------------|--------|----------------|----------------|----------------|----------------|-----------------|-----------------|
| <b>8<sub>E</sub></b>     | +0.379 | +0.407         | +0.414         | +0.409         | +0.404         | -0.512          | -0.512          |
| <b>TS-1</b>              | +0.390 | +0.403         | +0.440         | +0.170         | +0.686         | -0.562          | -0.485          |
| <b>Int-1</b>             | +0.356 | +0.398         | +0.434         | +0.182         | +0.616         | -0.659          | -0.244          |
| <b>TS-2</b>              | +0.391 | +0.381         | +0.425         | +0.232         | +0.562         | -0.675          | -0.278          |
| <b>Int-2</b>             | +0.369 | +0.407         | +0.408         | +0.237         | +0.550         | -0.680          | -0.335          |
| <b>Int-3<sub>A</sub></b> | +0.310 | +0.374         | +0.414         | +0.385         | +0.505         | -0.703          | -0.321          |
| <b>TS-3<sub>A</sub></b>  | +0.316 | +0.358         | +0.357         | +0.370         | +0.517         | -0.688          | -0.284          |
| <b>8<sub>A</sub></b>     | +0.239 | +0.358         | +0.388         | +0.277         | +0.642         | -0.659          | -0.249          |
| <b>Int-3<sub>B</sub></b> | +0.255 | +0.369         | +0.347         | +0.429         | +0.518         | -0.629          | -0.253          |
| <b>TS-3<sub>B</sub></b>  | +0.217 | +0.354         | +0.329         | +0.505         | +0.494         | -0.675          | -0.203          |
| <b>Int-4<sub>B</sub></b> | +0.282 | +0.378         | +0.347         | +0.455         | +0.499         | -0.586          | -0.290          |
| <b>TS-4<sub>B</sub></b>  | +0.294 | +0.361         | +0.349         | +0.481         | +0.517         | -0.708          | -0.262          |
| <b>8<sub>B</sub></b>     | +0.235 | +0.384         | +0.390         | +0.279         | +0.610         | -0.650          | -0.245          |

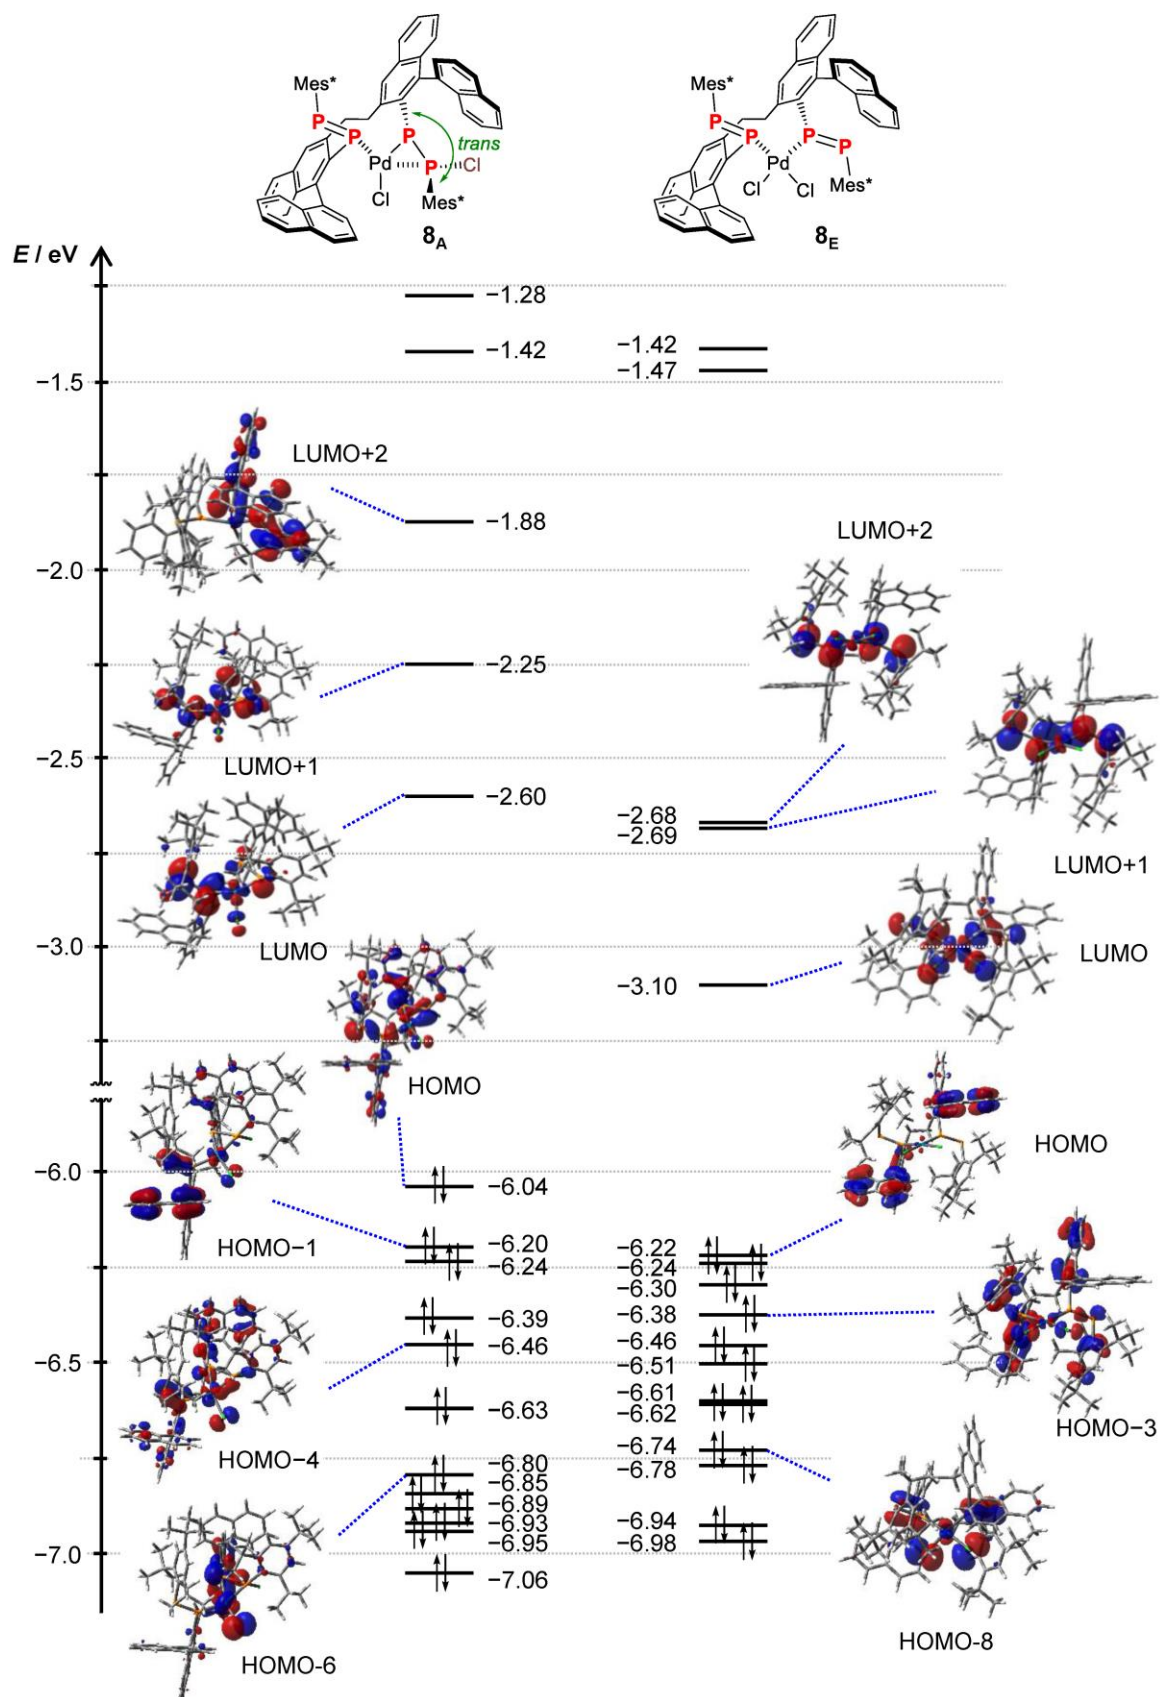

**Figure S29.** Energy diagram and the selected molecular orbitals of  $\mathbf{8}_A$  and  $\mathbf{8}_E$  mainly including the central  $\text{PdP}_m\text{Cl}_n$  moieties ( $m = 2$  or  $3$ ,  $n = 1$  or  $2$ ; isovalue = 0.03).

### 5-3. GIAO Calculations of Palladium Complexes of 7<sup>+</sup>, 7b, and 8.

#### 5-3-1. Initial Survey of Functionals.

Prior to the GIAO calculations of palladium complexes of 7<sup>+</sup>, 7b, and 8, the suitable functionals were surveyed by the use of binaphthyldiphosphene gold complex [1(AuCl)],<sup>S20</sup> which was structurally characterized as a *syn* isomer with the  $\eta^1$ -coordination to a gold atom by the X-ray crystallographic analysis. The GIAO calculations of [1(AuCl)] were carried out at the basis sets of SDD<sup>S13</sup> (Au) and 6-311G(2d,2p) (P, Cl, C, H) levels in conjunction with PCM model<sup>S14</sup> (chloroform) after the optimization at an M06 functional<sup>S12</sup> with the basis set of SDD<sup>S13</sup> (Au) and 6-31G(d) (P, Cl, C, H) level of theory. The chemical shift of PMe<sub>3</sub> in CDCl<sub>3</sub> (−61.6 ppm)<sup>S21</sup> was used as the reference for the estimation of chemical shifts. The results were summarized in Table S5. Based on these results, an OLYP functional was selected for the calculations of palladium complexes of 7<sup>+</sup>, 7b, and 8.

**Table S5.** The calculated <sup>31</sup>P chemical shifts of gold complex of binaphthyldiphosphene, [1(AuCl)]. The deviation from the experimental values was shown in a bracket with an italic font.

| Functional                                 | <i>syn</i> -[1(AuCl)]   |                           | <i>anti</i> -[1(AuCl)]  |                           |
|--------------------------------------------|-------------------------|---------------------------|-------------------------|---------------------------|
|                                            | <i>P</i> <sub>BNP</sub> | <i>P</i> <sub>Mes</sub> * | <i>P</i> <sub>BNP</sub> | <i>P</i> <sub>Mes</sub> * |
| BP86 <sup>S18b,22</sup>                    | 308.1 (−7.6)            | 444.0 (+38.0)             | 311.8 (−3.9)            | 471.7 (+65.7)             |
| BLYP <sup>S18a,b</sup>                     | 314.9 (−0.8)            | 449.8 (+43.8)             | 319.0 (+3.3)            | 477.0 (+71.0)             |
| B3LYP <sup>S18</sup>                       | 352.0 (+36.3)           | 496.0 (+90.0)             | 355.4 (+39.7)           | 522.3 (+116.3)            |
| PBE0 <sup>S17</sup>                        | 349.7 (+34.0)           | 495.2 (+89.2)             | 352.3 (+36.6)           | 521.6 (+115.6)            |
| OLYP <sup>S23</sup>                        | 296.8 (−18.9)           | 427.9 (+21.9)             | 300.1 (−15.6)           | 450.2 (+44.2)             |
| OPBE <sup>S24</sup>                        | 290.8 (−24.9)           | 423.6 (+17.6)             | 293.3 (−22.4)           | 445.1 (+39.1)             |
| BMK <sup>S25</sup>                         | 454.0 (+138.3)          | 613.3 (+207.3)            | 454.8 (+139.1)          | 641.4 (+235.4)            |
| B3PW91 <sup>S18c</sup>                     | 346.3 (+30.6)           | 491.8 (+85.8)             | 349.2 (+33.5)           | 517.9 (+111.9)            |
| M06 <sup>S12</sup>                         | 398.6 (+82.9)           | 560.9 (+154.9)            | 401.4 (+85.7)           | 584.0 (+178.0)            |
| CAM-B3LYP <sup>S26</sup>                   | 390.4 (+74.9)           | 553.5 (+147.5)            | 391.9 (+76.2)           | 577.8 (+171.8)            |
| ωB97XD <sup>S27</sup>                      | 385.4 (+69.7)           | 546.3 (+140.3)            | 386.9 (+71.2)           | 569.4 (+163.4)            |
| LC-BLYP <sup>S28</sup>                     | 446.0 (+130.3)          | 639.1 (+233.1)            | 445.6 (+129.9)          | 663.2 (+257.2)            |
| <b>[1(AuCl)]</b>                           | 315.7                   | 405.9                     |                         |                           |
| (observed) <sup>a,b</sup>                  |                         |                           |                         |                           |
| <b>Diphosphene</b>                         |                         |                           |                         |                           |
| ( <i>syn,anti</i> )- <b>2</b> <sup>c</sup> | 473.4 (+22.3)           | 547.8 (+19.0)             | 452.4 (+1.3)            | 556.9 (+28.1)             |
| <b>2</b> (observed) <sup>a</sup>           | 451.1                   | 528.8                     |                         |                           |
| <i>syn</i> - <b>1</b> <sup>c</sup>         | 459.8 (+8.3)            | 534.2 (+8.5)              |                         |                           |
| <b>1</b> (observed) <sup>a,d</sup>         | 451.5                   | 525.7                     |                         |                           |

a) In CDCl<sub>3</sub>. b) Ref. S20. c) Calculated at GIAO-OLYP/6-311G(2d,2p)//M06/6-31G(d) level of theory with PCM model (chloroform). d) Ref. 1.

### 5-3-2. GIAO Calculations of Palladium Complexes 7.

The GIAO calculations of the cation moiety of palladium complexes  $7_A^+$  to  $7_I^+$  and the real molecules  $7b_X$  to  $7b_Z$  were carried out at an OLYP functional<sup>S24</sup> with the basis set of SDD<sup>S13</sup> (Pd,Sb) and 6-311G(2d,2p) (P,F,C,H) level of theory in conjunction with PCM model<sup>S14</sup> (dichloromethane). The optimized structures  $7_A^+$  to  $7_I^+$  and  $7b_X$  to  $7b_Z$  calculated at M06/SDD (Pd,Sb) and 6-31G(d) (P,F,C,H) level were used for calculations. The results are shown in Tables S6 and Figure S30. The chemical shift of  $PMe_3$  in  $CDCl_3$  ( $-61.6$  ppm)<sup>S21</sup> was used as the reference for the estimation of chemical shifts.

**Table S6.** The calculated  $^{31}P$  chemical shifts of palladium complexes  $7_A^+$  to  $7_I^+$  and  $7b_X$  to  $7b_Z$ . The phosphorus atoms coordinated to a palladium atom are shown in brown.

| Structure                    | $P^A$               | $P^B$ | $P^C$         | $P^D$ |
|------------------------------|---------------------|-------|---------------|-------|
|                              | (binaphthyl groups) |       | (Mes* groups) |       |
| $7_A^+$                      | 375.4               | 375.9 | 469.1         | 485.8 |
| $7_B^+$                      | 344.9               | 373.4 | 471.8         | 549.5 |
| $7_C^+$                      | 386.3               | 426.9 | 504.9         | 407.9 |
| $7_D^+$                      | 350.6               | 466.3 | 525.0         | 499.2 |
| $7_E^+$                      | 394.7               | 496.6 | 402.9         | 456.9 |
| $7_F^+$                      | 370.4               | 369.6 | 506.0         | 512.6 |
| $7_G^+$                      | 359.6               | 426.7 | 460.7         | 380.1 |
| $7_H^+$                      | 465.8               | 380.5 | 461.2         | 534.5 |
| $7_I^+$                      | 497.9               | 527.1 | 449.5         | 419.4 |
| $7b_X$ (= $[7_A(SbF_6)]$ )   | 371.7               | 374.1 | 480.7         | 479.1 |
| $7b_Y$ (= $[7_A(SbF_6)]$ )   | 369.1               | 381.4 | 464.2         | 480.9 |
| $7b_Z$ (= $[7_A(SbF_6)]$ )   | 351.1               | 383.0 | 493.9         | 480.4 |
| $7a$ (observed) <sup>a</sup> | 333.8               | 338.5 | 469.9         | 479.3 |
| $7b$ (observed) <sup>a</sup> | 334.2               | 339.0 | 470.0         | 479.4 |

a) In  $CD_2Cl_2$ .

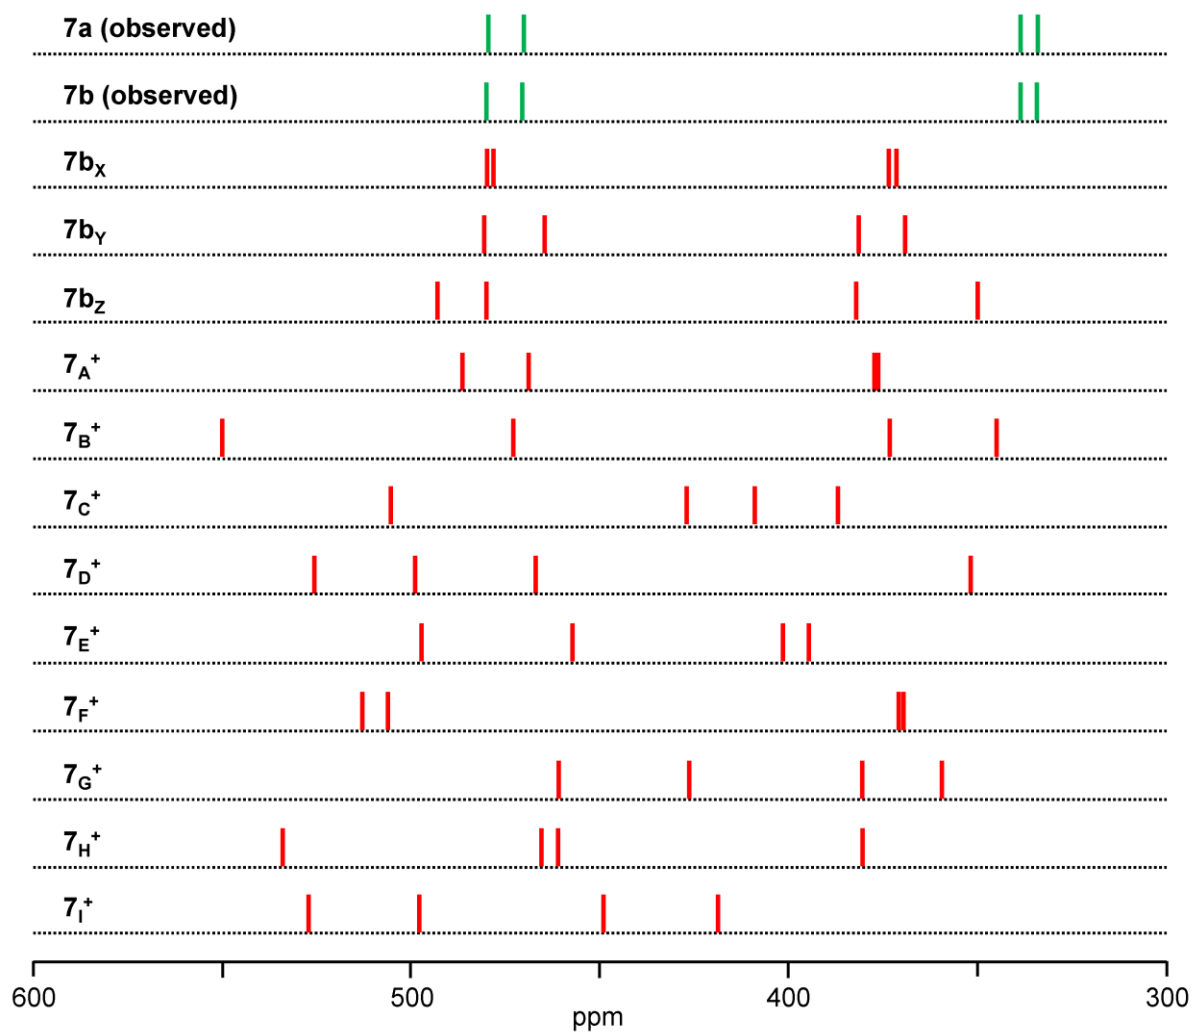

**Figure S30.** Schematic representation of calculated  $^{31}\text{P}$  NMR spectra for the conformationally different palladium complexes .



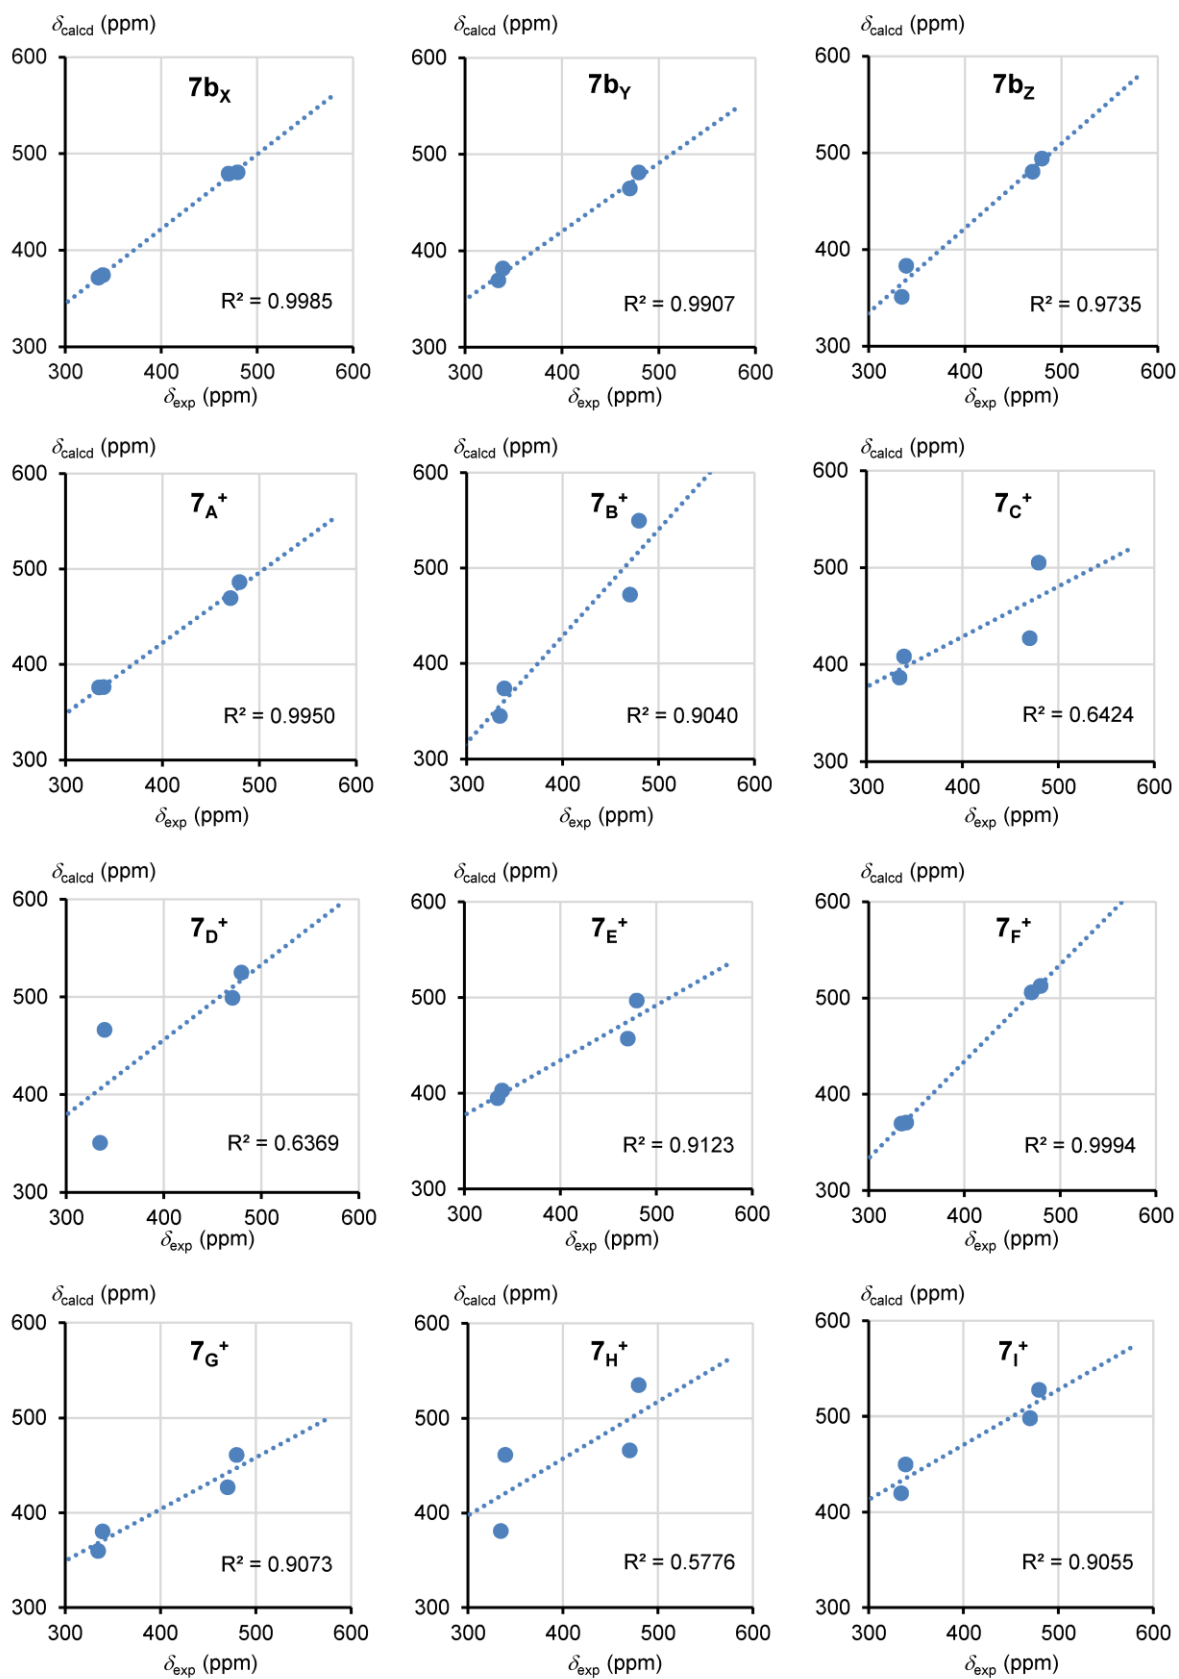

**Figure S31.** Plots of calculated  $^{31}\text{P}$  chemical shifts versus observed  $^{31}\text{P}$  chemical shift of **7b**.

### 5-3-3. GIAO Calculations of Palladium Complexes **8**.

The GIAO calculations of palladium complexes **8** were carried out at an OLYP<sup>S24</sup> functional with the basis set of SDD<sup>S13</sup> (Pd) and 6-311G(2d,2p) (P,Cl,C,H) level in conjunction with PCM model<sup>S14</sup> (dichloromethane). The optimized structures calculated at M06/SDD (Pd) and 6-31G(d) (P,Cl,C,H) level (for **8<sub>A</sub>** to **8<sub>D</sub>** and **8<sub>F</sub>** to **8<sub>I</sub>**) and M06-D3/SDD (Pd) and 6-31G(d) (P,Cl,C,H) level (for **8<sub>A</sub>** to **8<sub>D</sub>**) were used for calculations. An OPBE<sup>S25</sup> functional instead of OLYP was also used for calculations (for **8<sub>A</sub>** to **8<sub>D</sub>**). The results were shown in Table S7 and Figure S32. The chemical shift of PMe<sub>3</sub> in CDCl<sub>3</sub> (−61.6 ppm)<sup>S20</sup> was used as the reference for the estimation of chemical shifts.

**Table S7.** The calculated <sup>31</sup>P chemical shifts of palladium complexes **8**. Calculated at GIAO-F1/SDD (Pd) and 6-311G(2d,2p) (P,Cl,C,H) (PCM = CH<sub>2</sub>Cl<sub>2</sub>)/F2/SDD (Pd) and 6-31G(d) (P,Cl,C,H), (PCM = CH<sub>2</sub>Cl<sub>2</sub>) level of theory. The deviation from the experimental values was shown in a bracket with an italic font.

| Structure                | <i>P<sup>A</sup></i> (P <sup>1</sup> ) | <i>P<sup>B</sup></i> (P <sup>2</sup> ) | <i>P<sup>C</sup></i> (P <sup>4</sup> ) | <i>P<sup>D</sup></i> (P <sup>3</sup> ) |
|--------------------------|----------------------------------------|----------------------------------------|----------------------------------------|----------------------------------------|
| <b>8</b> (observed)      | 463.2                                  | 338.9                                  | 97.4                                   | −39.6                                  |
| [F1 = OLYP, F2 = M06]    |                                        |                                        |                                        |                                        |
| <b>8<sub>A</sub></b>     | 457.5 (−5.7)                           | 395.6 (+56.7)                          | 139.2 (+41.8)                          | 15.6 (+55.2)                           |
| <b>8<sub>B</sub></b>     | 475.1 (+11.9)                          | 396.0 (+57.1)                          | 100.6 (+3.2)                           | 39.2 (+78.8)                           |
| <b>8<sub>C</sub></b>     | 482.8 (+19.6)                          | 381.9 (+43.0)                          | 143.0 (+45.6)                          | 92.2 (+131.8)                          |
| <b>8<sub>D</sub></b>     | 485.5 (+22.3)                          | 384.3 (+45.4)                          | 130.7 (+33.3)                          | 93.4 (+133.0)                          |
| <b>8<sub>F</sub></b>     | 516.5 (+53.3)                          | 373.8 (+34.9)                          | 115.7 (+18.3)                          | 67.5 (+107.1)                          |
| <b>8<sub>G</sub></b>     | 509.0 (+45.8)                          | 363.0 (+24.1)                          | 97.7 (+0.3)                            | 56.3 (+95.9)                           |
| <b>8<sub>H</sub></b>     | 512.3 (+49.1)                          | 375.0 (+36.1)                          | 54.3 (−43.1)                           | 133.0 (+172.6)                         |
| <b>8<sub>I</sub></b>     | 483.3 (+20.1)                          | 387.6 (+48.7)                          | 70.2 (−27.2)                           | 76.6 (+116.2)                          |
| [F1 = OLYP, F2 = M06-D3] |                                        |                                        |                                        |                                        |
| <b>8<sub>A</sub></b>     | 453.8 (−9.4)                           | 395.6 (+56.7)                          | 137.2 (+39.8)                          | 11.0 (+50.6)                           |
| <b>8<sub>B</sub></b>     | 453.9 (−9.3)                           | 396.8 (+57.9)                          | 101.6 (+4.2)                           | 40.9 (+80.5)                           |
| <b>8<sub>C</sub></b>     | 477.9 (+14.7)                          | 381.8 (+42.9)                          | 121.5 (+24.1)                          | 89.2 (+128.8)                          |
| <b>8<sub>D</sub></b>     | 482.7 (+19.5)                          | 382.3 (+43.4)                          | 128.0 (+30.6)                          | 90.2 (+129.8)                          |
| [F1 = OPBE, F2 = M06]    |                                        |                                        |                                        |                                        |
| <b>8<sub>A</sub></b>     | 450.0 (−13.2)                          | 384.8 (+45.9)                          | 133.4 (+36.0)                          | 12.5 (+52.1)                           |
| <b>8<sub>B</sub></b>     | 468.4 (+5.2)                           | 385.0 (+46.1)                          | 95.8 (−1.6)                            | 34.5 (+74.1)                           |
| <b>8<sub>C</sub></b>     | 474.2 (+11.0)                          | 370.0 (+31.1)                          | 136.0 (+38.6)                          | 89.5 (+129.1)                          |
| <b>8<sub>D</sub></b>     | 478.2 (+15.0)                          | 373.0 (+34.1)                          | 126.5 (+29.1)                          | 89.9 (+129.5)                          |
| [F1 = OPBE, F2 = M06-D3] |                                        |                                        |                                        |                                        |
| <b>8<sub>A</sub></b>     | 445.1 (−18.1)                          | 384.4 (+45.5)                          | 131.5 (+34.1)                          | 8.8 (+48.4)                            |
| <b>8<sub>B</sub></b>     | 446.0 (−17.2)                          | 385.5 (+46.6)                          | 96.8 (−0.6)                            | 38.1 (+77.7)                           |
| <b>8<sub>C</sub></b>     | 468.6 (+5.4)                           | 370.6 (+31.7)                          | 113.3 (+15.9)                          | 86.8 (+126.4)                          |
| <b>8<sub>D</sub></b>     | 474.2 (+11.0)                          | 371.1 (+32.2)                          | 123.4 (+26.0)                          | 87.2 (+126.8)                          |

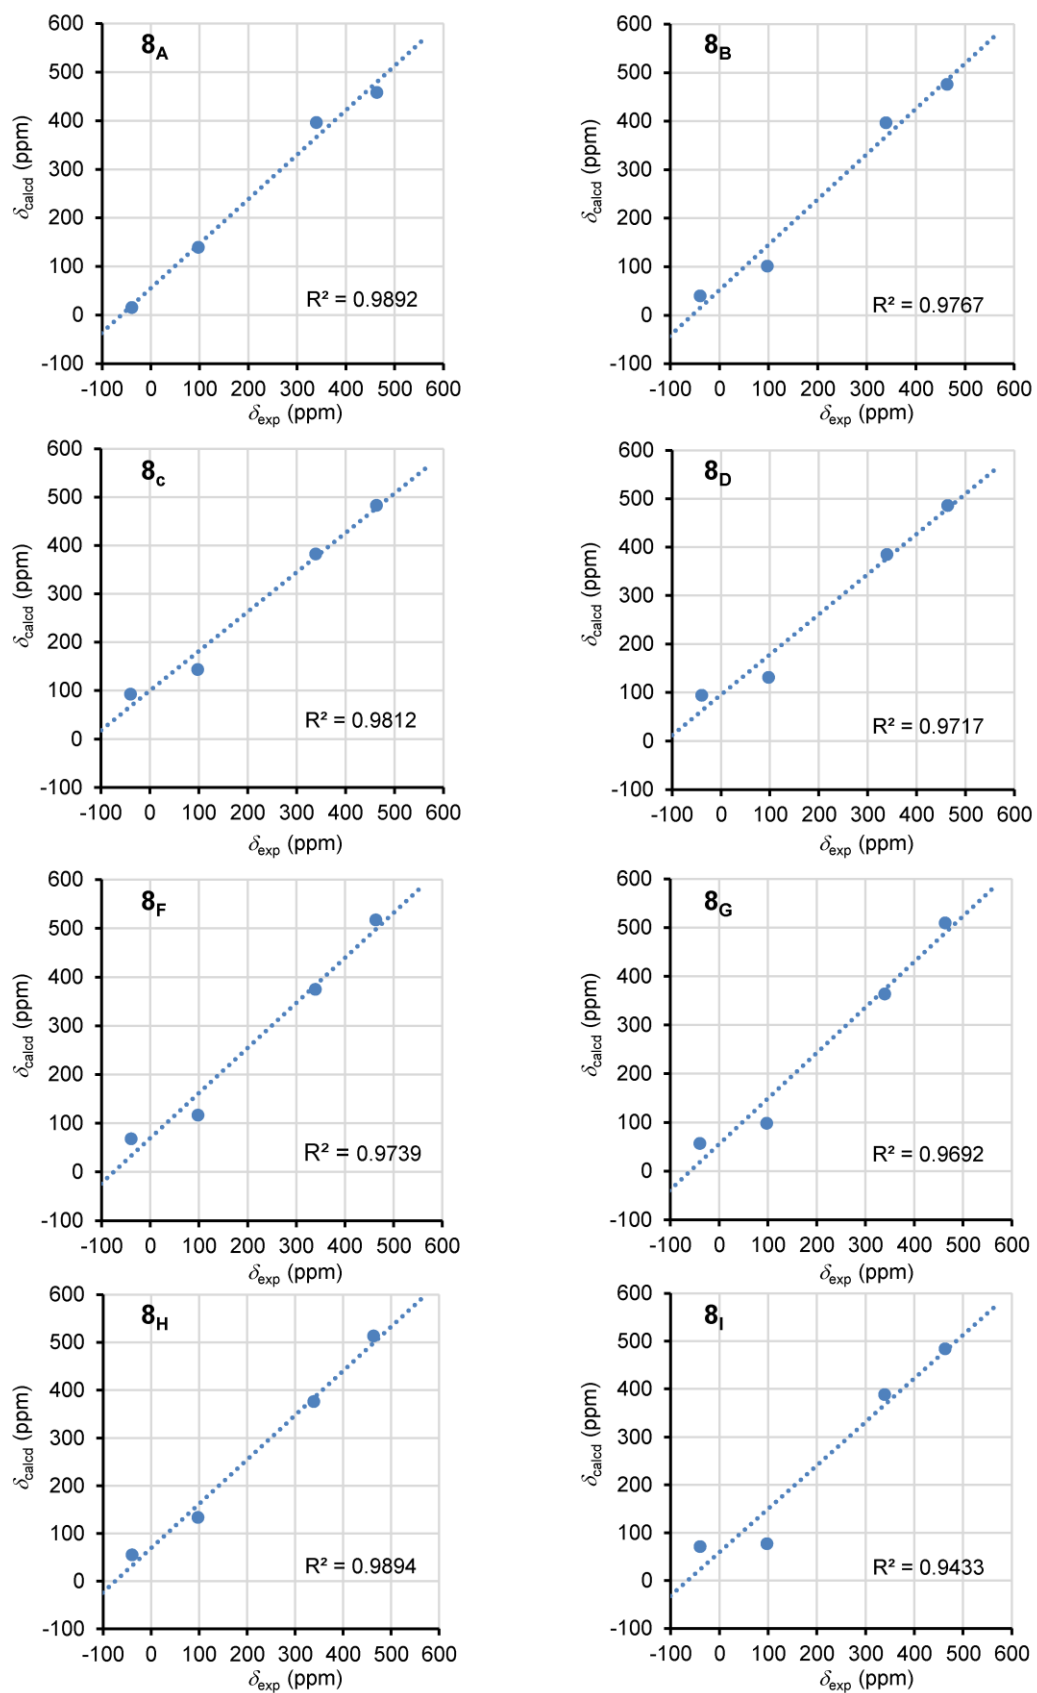

**Figure S32.** Plots of calculated  $^{31}\text{P}$  chemical shifts *versus* observed  $^{31}\text{P}$  chemical shift of **8**.

**Table S8.** Magnet shielding tensors of  $^{31}\text{P}$  nuclei of  $7_{\text{A}}^+-7_{\text{I}}^+$ ,  $7_{\text{bX}}-7_{\text{bZ}}$ ,  $8_{\text{A}}-8_{\text{D}}$ ,  $8_{\text{F}}-8_{\text{I}}$ , and **2** calculated by the GIAO Method [OLYP/SDD (Pd,Sb) and 6-311G(2d,2p) (P,Cl,F,C,H)/M06/SDD (Pd,Sb) and 6-31G(d) (P,Cl,F,C,H) (PCM =  $\text{CH}_2\text{Cl}_2$ )].

SCF GIAO Magnetic shielding tensor (ppm) of  $7_{\text{A}}^+$ :

1 P Isotropic = -60.9116 Anisotropy = 549.9543  
 XX= 58.6383 YX= 97.2111 ZX= 303.3392  
 XY= 172.3060 YY= -135.5596 ZY= -347.7857  
 XZ= 313.4686 YZ= -186.4348 ZZ= -105.8133  
 Eigenvalues: -552.0355 63.5762 305.7247

2 P Isotropic = -61.4167 Anisotropy = 542.8649  
 XX= 40.3138 YX= 114.8215 ZX= -299.7772  
 XY= 216.4369 YY= -161.5917 ZY= 342.8095  
 XZ= -306.1988 YZ= 166.0703 ZZ= -62.9720  
 Eigenvalues: -552.1031 67.3598 300.4933

3 P Isotropic = -154.6053 Anisotropy = 703.0446  
 XX= 11.1063 YX= 182.9026 ZX= 360.6863  
 XY= 98.8153 YY= -391.6371 ZY= -332.8134  
 XZ= 280.8519 YZ= -350.1097 ZZ= -83.2853  
 Eigenvalues: -733.8278 -44.0793 314.0911

4 P Isotropic = -171.3119 Anisotropy = 737.7960  
 XX= -13.8327 YX= 218.2050 ZX= -371.6080  
 XY= 136.6107 YY= -474.4831 ZY= 335.0383  
 XZ= -277.8647 YZ= 303.4237 ZZ= -25.6198  
 Eigenvalues: -772.7117 -61.7760 320.5521

SCF GIAO Magnetic shielding tensor (ppm) of  $7_{\text{B}}^+$ :

1 P Isotropic = -30.4115 Anisotropy = 473.3705  
 XX= -232.4560 YX= 87.6880 ZX= -389.9696  
 XY= -36.7276 YY= 170.3559 ZY= 87.8189  
 XZ= -240.6413 YZ= 178.8604 ZZ= -29.1345  
 Eigenvalues: -477.5434 101.1399 285.1688

2 P Isotropic = -58.7058 Anisotropy = 577.6078  
 XX= -169.2806 YX= 218.0152 ZX= 450.2741  
 XY= 78.7150 YY= 60.6744 ZY= -264.0796  
 XZ= 248.6724 YZ= -306.4271 ZZ= -67.5114  
 Eigenvalues: -608.4265 105.9430 326.3660

3 P Isotropic = -157.3319 Anisotropy = 725.1071  
 XX= -551.5277 YX= -191.8395 ZX= -367.8226  
 XY= -26.4547 YY= 79.8055 ZY= 206.8452  
 XZ= -367.4109 YZ= 102.2433 ZZ= -0.2736  
 Eigenvalues: -736.4138 -61.6548 326.0728

4 P Isotropic = -234.9827 Anisotropy = 803.3033  
 XX= -561.0428 YX= 14.2978 ZX= 385.1932  
 XY= 176.7267 YY= -29.7553 ZY= -311.7798  
 XZ= 557.7084 YZ= -240.4538 ZZ= -114.1501  
 Eigenvalues: -919.9402 -85.5609 300.5528

SCF GIAO Magnetic shielding tensor (ppm) of  $7_{\text{C}}^+$ :

1 P Isotropic = -71.8657 Anisotropy = 528.7322  
 XX= 190.3373 YX= 3.7972 ZX= 139.5132  
 XY= -42.1848 YY= -136.6141 ZY= 395.6657  
 XZ= 209.4436 YZ= 271.4864 ZZ= -269.3203  
 Eigenvalues: -571.9365 75.7170 280.6224

2 P Isotropic = -112.4206 Anisotropy = 639.9216  
 XX= -0.6641 YX= 222.3675 ZX= 28.0973  
 XY= 101.3470 YY= -306.4842 ZY= -494.7246  
 XZ= -86.6052 YZ= -332.1583 ZZ= -30.1135  
 Eigenvalues: -625.6441 -25.8115 314.1939

3 P Isotropic = -190.4042 Anisotropy = 786.9472  
 XX= 172.5460 YX= 75.6742 ZX= 205.0567  
 XY= 102.2010 YY= -408.6670 ZY= 524.3906  
 XZ= 146.0962 YZ= 435.1337 ZZ= -335.0915  
 Eigenvalues: -855.9978 -49.4421 334.2273

4 P Isotropic = -93.4529 Anisotropy = 643.0132  
 XX= 25.6882 YX= 148.7091 ZX= -19.6931  
 XY= 355.2112 YY= -325.2381 ZY= -423.2453  
 XZ= 184.9171 YZ= -443.0109 ZZ= 19.1913  
 Eigenvalues: -708.2784 92.6972 335.2226

SCF GIAO Magnetic shielding tensor (ppm) of  $7\text{D}^+$ :

1 P Isotropic = -36.1244 Anisotropy = 484.0351  
 XX= -89.5731 YX= -23.2473 ZX= 410.7023  
 XY= -166.5299 YY= 151.1542 ZY= 78.8114  
 XZ= 329.8205 YZ= -94.5881 ZZ= -169.9544  
 Eigenvalues: -507.2809 112.3420 286.5657

2 P Isotropic = -151.7879 Anisotropy = 659.3069  
 XX= -385.7166 YX= -454.5741 ZX= -300.7946  
 XY= -251.8844 YY= -133.3391 ZY= 1.9425  
 XZ= -389.2220 YZ= -152.5905 ZZ= 63.6920  
 Eigenvalues: -765.6729 22.5592 287.7500

3 P Isotropic = -210.5769 Anisotropy = 802.8665  
 XX= -316.2050 YX= -403.6355 ZX= 544.5730  
 XY= -248.7623 YY= -96.3595 ZY= -9.0058  
 XZ= 439.9759 YZ= 99.0222 ZZ= -219.1661  
 Eigenvalues: -862.9575 -93.4405 324.6675

4 P Isotropic = -184.7203 Anisotropy = 806.8616  
 XX= -500.2899 YX= -445.5676 ZX= -479.2600  
 XY= -322.4589 YY= -79.8458 ZY= -55.3905  
 XZ= -457.2225 YZ= -95.4042 ZZ= 25.9748  
 Eigenvalues: -936.2505 28.9021 353.1874

SCF GIAO Magnetic shielding tensor (ppm) of  $7\text{E}^+$ :

1 P Isotropic = -80.2003 Anisotropy = 606.0633  
 XX= -25.3906 YX= -242.1198 ZX= -69.8293  
 XY= -126.5619 YY= -173.9630 ZY= -475.9059  
 XZ= 57.2869 YZ= -295.3677 ZZ= -41.2472  
 Eigenvalues: -540.9789 -23.4638 323.8419

2 P Isotropic = -182.1497 Anisotropy = 776.9079  
 XX= 145.6285 YX= -226.9465 ZX= -72.5542  
 XY= -355.5210 YY= -650.3520 ZY= 341.0003  
 XZ= -61.0468 YZ= 328.9747 ZZ= -41.7257  
 Eigenvalues: -857.6357 -24.6023 335.7889

3 P Isotropic = -88.4345 Anisotropy = 650.7189  
 XX= -30.1416 YX= -199.5084 ZX= -34.3101  
 XY= -383.6880 YY= -197.6437 ZY= -418.4580  
 XZ= -215.2670 YZ= -432.8927 ZZ= -37.5182  
 Eigenvalues: -692.1415 81.4598 345.3781

4 P Isotropic = -142.4778 Anisotropy = 658.5336  
 XX= 62.2466 YX= -251.4026 ZX= -95.4906  
 XY= -421.6444 YY= -529.6233 ZY= 170.8382  
 XZ= 24.0396 YZ= 313.3921 ZZ= 39.9432  
 Eigenvalues: -737.6540 13.6759 296.5446

SCF GIAO Magnetic shielding tensor (ppm) of  $7\text{F}^+$ :

1 P Isotropic = -55.6516 Anisotropy = 562.6102  
 XX= -329.3833 YX= -456.8629 ZX= 33.2737  
 XY= -280.0465 YY= -108.3294 ZY= 107.6712  
 XZ= -98.8850 YZ= 57.7599 ZZ= 270.7578  
 Eigenvalues: -604.1460 117.7693 319.4218

2 P Isotropic = -54.8142 Anisotropy = 506.3571  
 XX= -149.9062 YX= -210.5249 ZX= 320.8096  
 XY= -322.9074 YY= -38.6509 ZY= 168.4620  
 XZ= 272.8193 YZ= 11.5991 ZZ= 24.1144  
 Eigenvalues: -523.0039 75.8040 282.7571

3 P Isotropic = -191.2727 Anisotropy = 751.4839  
 XX= -607.3765 YX= -214.3289 ZX= -143.9985  
 XY= -438.9967 YY= -167.2385 ZY= 120.3650  
 XZ= -157.7632 YZ= 120.4321 ZZ= 200.7969  
 Eigenvalues: -787.3770 -96.1576 309.7166

4 P Isotropic = -197.8465 Anisotropy = 789.0973  
 XX= -207.6073 YX= -455.3086 ZX= 389.3730  
 XY= -372.5440 YY= -429.0214 ZY= 113.9977  
 XZ= 309.4119 YZ= 109.1509 ZZ= 43.0892  
 Eigenvalues: -853.4273 -68.3306 328.2184

SCF GIAO Magnetic shielding tensor (ppm) of  $7\text{G}^+$ :

1 P Isotropic = -44.7875 Anisotropy = 508.7776  
 XX= -153.4197 YX= -370.3788 ZX= 13.8680  
 XY= -256.5603 YY= -215.9519 ZY= 139.3120  
 XZ= -78.4287 YZ= 73.1819 ZZ= 235.0090  
 Eigenvalues: -504.2091 75.4489 294.3976

2 P Isotropic = -111.9779 Anisotropy = 591.9847  
 XX= -3.4962 YX= 55.8229 ZX= 105.4829  
 XY= -134.7511 YY= -476.2492 ZY= 336.3103  
 XZ= 130.8044 YZ= 217.3636 ZZ= 143.8118  
 Eigenvalues: -592.6502 -25.9620 282.6786

3 P Isotropic = -145.9445 Anisotropy = 695.5087  
 XX= -423.7509 YX= -342.5856 ZX= -128.1437  
 XY= -420.4979 YY= -261.4519 ZY= 72.1407  
 XZ= -151.9681 YZ= 43.0192 ZZ= 247.3691  
 Eigenvalues: -738.1529 -17.4087 317.7280

4 P Isotropic = -65.3744 Anisotropy = 595.9141  
 XX= 116.5146 YX= -116.7600 ZX= 120.5129  
 XY= 223.1172 YY= -526.7791 ZY= 254.6035  
 XZ= -33.7491 YZ= 331.2116 ZZ= 214.1413  
 Eigenvalues: -630.3279 102.3031 331.9017

SCF GIAO Magnetic shielding tensor (ppm) of  $7\text{H}^+$ :

1 P Isotropic = -151.0655 Anisotropy = 719.1117  
 XX= -195.3708 YX= 450.3989 ZX= -249.1794  
 XY= 402.5750 YY= -329.4874 ZY= 12.1693  
 XZ= -283.4709 YZ= 33.5286 ZZ= 71.6618  
 Eigenvalues: -741.0133 -40.5253 328.3423

2 P Isotropic = -65.7873 Anisotropy = 572.7067  
 XX= -382.0819 YX= 292.1648 ZX= -417.7608  
 XY= 135.7412 YY= 111.4521 ZY= 224.0884  
 XZ= -175.1339 YZ= 212.5187 ZZ= 73.2678  
 Eigenvalues: -640.5888 127.2096 316.0171

3 P Isotropic = -146.3960 Anisotropy = 640.2008  
 XX= -141.3223 YX= 495.2018 ZX= -188.8805  
 XY= 317.2593 YY= -432.7406 ZY= -5.4014  
 XZ= -184.9325 YZ= 81.3836 ZZ= 134.8749  
 Eigenvalues: -741.0413 21.4487 280.4045

4 P Isotropic = -219.7323 Anisotropy = 758.1170  
 XX= -728.4497 YX= 45.7956 ZX= -102.3688  
 XY= 219.5452 YY= 9.1863 ZY= 239.2779  
 XZ= -355.3997 YZ= 245.2396 ZZ= 60.0666  
 Eigenvalues: -835.5365 -109.3395 285.6791

SCF GIAO Magnetic shielding tensor (ppm) of  $7\text{I}^+$ :

1 P Isotropic = -183.1363 Anisotropy = 784.0616  
 XX= -85.7860 YX= -241.2365 ZX= -135.6361  
 XY= -277.4510 YY= -735.4109 ZY= 96.7555  
 XZ= -66.9967 YZ= 179.8051 ZZ= 271.7881  
 Eigenvalues: -834.9365 -54.0438 339.5715

2 P Isotropic = -212.3188 Anisotropy = 773.1862  
 XX= 24.9543 YX= 245.5929 ZX= 77.7605  
 XY= 214.8701 YY= -708.9421 ZY= 353.1323  
 XZ= 46.5667 YZ= 436.1358 ZZ= 47.0315  
 Eigenvalues: -915.5051 -24.5898 303.1387

3 P Isotropic = -134.6952 Anisotropy = 617.3087  
 XX= -77.7569 YX= -250.1546 ZX= -114.9827  
 XY= -363.2379 YY= -546.5741 ZY= -15.0007  
 XZ= -76.1705 YZ= 112.0614 ZZ= 220.2453  
 Eigenvalues: -698.1850 17.2555 276.8439

4 P Isotropic = -104.6072 Anisotropy = 586.0903  
 XX= 59.5345 YX= 164.7779 ZX= 56.7650  
 XY= 386.6812 YY= -532.9208 ZY= 175.6460  
 XZ= -74.9578 YZ= 340.5117 ZZ= 159.5647  
 Eigenvalues: -710.2200 110.2787 286.1197

SCF GIAO Magnetic shielding tensor (ppm) of  $7\text{b}_x$ :

1 P Isotropic = -56.9576 Anisotropy = 553.6938  
 XX= -169.2200 YX= 72.7193 ZX= -278.6511  
 XY= 37.8253 YY= 271.8161 ZY= -107.0691  
 XZ= -382.6654 YZ= -37.8432 ZZ= -273.4688  
 Eigenvalues: -556.5358 73.4915 312.1716

2 P Isotropic = -59.3571 Anisotropy = 537.9462  
 XX= 261.1880 YX= -5.0230 ZX= 71.6712  
 XY= -37.3757 YY= -533.1554 ZY= 13.5461  
 XZ= 95.0540 YZ= -194.9893 ZZ= 93.8963  
 Eigenvalues: -546.1255 68.7806 299.2738

3 P Isotropic = -165.9426 Anisotropy = 727.9035  
 XX= -215.9652 YX= 48.3759 ZX= -393.1666  
 XY= 19.8532 YY= 268.1032 ZY= -176.6162  
 XZ= -307.3517 YZ= -133.1207 ZZ= -549.9659  
 Eigenvalues: -783.2783 -33.8759 319.3264

4 P Isotropic = -164.3508 Anisotropy = 742.3270  
 XX= 222.0589 YX= -81.9208 ZX= 168.5057  
 XY= 33.6222 YY= -666.7996 ZY= -235.9003  
 XZ= 190.6468 YZ= -253.0289 ZZ= -48.3118  
 Eigenvalues: -753.1533 -70.4330 330.5338

SCF GIAO Magnetic shielding tensor (ppm) of  $7\text{b}_y$ :

1 P Isotropic = -54.3283 Anisotropy = 547.5532  
 XX= 153.3808 YX= -162.8847 ZX= 8.9018  
 XY= -196.9677 YY= 50.8778 ZY= -235.0906  
 XZ= -157.6023 YZ= -307.7900 ZZ= -367.2434  
 Eigenvalues: -532.9991 59.3071 310.7072

2 P Isotropic = -66.6305 Anisotropy = 552.9113  
 XX= -365.7631 YX= 341.2340 ZX= 69.6214  
 XY= 276.7384 YY= 66.4901 ZY= 85.5821  
 XZ= 247.8341 YZ= 14.5133 ZZ= 99.3816  
 Eigenvalues: -548.6737 46.8052 301.9771

3 P Isotropic = -149.8562 Anisotropy = 695.1049  
 XX= 162.5490 YX= -173.7356 ZX= 18.3891  
 XY= -184.5090 YY= -3.7143 ZY= -329.5972  
 XZ= 36.4363 YZ= -225.2934 ZZ= -608.4032  
 Eigenvalues: -718.2551 -44.8605 313.5471

4 P Isotropic = -166.1315 Anisotropy = 735.7482  
 XX= -491.2208 YX= 274.6574 ZX= 322.2726  
 XY= 383.0901 YY= 14.7270 ZY= 46.0202  
 XZ= 361.5477 YZ= 57.3149 ZZ= -21.9008  
 Eigenvalues: -767.5914 -55.1705 324.3673

SCF GIAO Magnetic shielding tensor (ppm) of **7bz**:

1 P Isotropic = -36.3576 Anisotropy = 506.2136  
 XX= 16.1262 YX= -40.3198 ZX= 170.2991  
 XY= -146.1773 YY= -27.5708 ZY= 375.8873  
 XZ= 269.8003 YZ= 290.5492 ZZ= -97.6281  
 Eigenvalues: -498.3992 88.2083 301.1181

2 P Isotropic = -68.2751 Anisotropy = 558.6646  
 XX= 194.9444 YX= 119.5987 ZX= -53.6200  
 XY= 58.7126 YY= -383.8356 ZY= -406.8744  
 XZ= -127.2793 YZ= -222.2611 ZZ= -15.9340  
 Eigenvalues: -565.7017 56.7085 304.1680

3 P Isotropic = -179.1225 Anisotropy = 748.8653  
 XX= -41.7746 YX= -72.9893 ZX= 220.2221  
 XY= -7.7399 YY= -305.4607 ZY= 565.0425  
 XZ= 123.4316 YZ= 505.2535 ZZ= -190.1324  
 Eigenvalues: -813.5528 -43.9358 320.1210

4 P Isotropic = -165.6694 Anisotropy = 737.9023  
 XX= 109.7705 YX= 130.7039 ZX= -161.6482  
 XY= 227.8496 YY= -632.4053 ZY= -327.5653  
 XZ= -113.8824 YZ= -275.0622 ZZ= 25.6265  
 Eigenvalues: -765.9832 -57.2905 326.2654

SCF GIAO Magnetic shielding tensor (ppm) of **8A**:

1 P Isotropic = -143.0670 Anisotropy = 747.1206  
 XX= -165.7632 YX= 369.7507 ZX= -107.6036  
 XY= 398.1725 YY= -499.1895 ZY= -142.1719  
 XZ= -160.5733 YZ= -100.0789 ZZ= 235.7518  
 Eigenvalues: -751.8787 -32.3356 355.0134

2 P Isotropic = -81.1037 Anisotropy = 575.5504  
 XX= -145.7642 YX= 285.9960 ZX= -143.3326  
 XY= 436.0517 YY= -335.5349 ZY= 8.0215  
 XZ= -66.2681 YZ= -75.3537 ZZ= 237.9880  
 Eigenvalues: -615.5954 69.6876 302.5965

3 P Isotropic = 298.8445 Anisotropy = 281.1025  
 XX= 260.6029 YX= -47.3733 ZX= 55.8776  
 XY= -78.0330 YY= 436.7583 ZY= -155.0248  
 XZ= 37.1921 YZ= -7.7590 ZZ= 199.1722  
 Eigenvalues: 165.2578 245.0295 486.2461

4 P Isotropic = 175.3038 Anisotropy = 99.0679  
 XX= 150.4942 YX= 28.1040 ZX= -7.5564  
 XY= -75.3849 YY= 234.5519 ZY= -4.8795  
 XZ= 9.7930 YZ= 21.5729 ZZ= 140.8653  
 Eigenvalues: 138.5078 146.0546 241.3491

SCF GIAO Magnetic shielding tensor (ppm) of **8B**:

1 P Isotropic = -160.5968 Anisotropy = 763.8506  
 XX= 45.4868 YX= 204.4706 ZX= -211.9865  
 XY= 250.7422 YY= -695.9931 ZY= 116.3428  
 XZ= -251.2812 YZ= 130.2527 ZZ= 168.7159  
 Eigenvalues: -795.9435 -34.4837 348.6369

2 P Isotropic = -81.5221 Anisotropy = 542.1071  
 XX= 47.2141 YX= 173.4693 ZX= -188.6233  
 XY= 245.6704 YY= -437.3876 ZY= 196.5533  
 XZ= -164.8757 YZ= 125.2631 ZZ= 145.6071  
 Eigenvalues: -579.2289 54.7799 279.8826

3 P Isotropic = 275.3131 Anisotropy = 289.9077  
 XX= 218.3535 YX= -26.0364 ZX= 49.9453  
 XY= 14.2335 YY= 419.3805 ZY= -208.7540  
 XZ= 66.4876 YZ= -17.3435 ZZ= 188.2051  
 Eigenvalues: 115.5715 241.7828 468.5849

4 P Isotropic = 213.9008 Anisotropy = 180.5778  
 XX= 126.4778 YX= -51.3031 ZX= -20.3274  
 XY= -139.3626 YY= 196.2368 ZY= -64.5876  
 XZ= 127.2039 YZ= 89.3862 ZZ= 318.9879  
 Eigenvalues: 50.1354 257.2811 334.2860

SCF GIAO Magnetic shielding tensor (ppm) of **8C**:

1 P Isotropic = -168.3042 Anisotropy = 761.9712  
 XX= -72.2827 YX= 243.2343 ZX= 284.8402  
 XY= 279.2342 YY= 172.3864 ZY= -232.9140  
 XZ= 234.5289 YZ= -167.8956 ZZ= -605.0161  
 Eigenvalues: -796.8768 -47.7124 339.6767

2 P Isotropic = -67.4131 Anisotropy = 615.6858  
 XX= -17.4022 YX= 237.7966 ZX= 188.7043  
 XY= 226.5999 YY= 189.0787 ZY= -149.7593  
 XZ= 329.9070 YZ= -280.7730 ZZ= -373.9157  
 Eigenvalues: -622.2916 77.0083 343.0441

3 P Isotropic = 222.2816 Anisotropy = 138.1731  
 XX= 235.2599 YX= 16.4129 ZX= -6.0571  
 XY= -26.6657 YY= 149.4195 ZY= -109.2715  
 XZ= -27.3279 YZ= -30.3988 ZZ= 282.1652  
 Eigenvalues: 118.3480 234.0998 314.3969

4 P Isotropic = 171.4495 Anisotropy = 199.9409  
 XX= 92.4747 YX= 83.5393 ZX= -62.2379  
 XY= 104.2631 YY= 166.2264 ZY= -8.0075  
 XZ= -116.6774 YZ= 153.6400 ZZ= 255.6475  
 Eigenvalues: -19.5906 229.1958 304.7435

SCF GIAO Magnetic shielding tensor (ppm) of  $\delta_D$ :

1 P Isotropic = -171.0692 Anisotropy = 754.4179  
 XX= -27.8555 YX= -12.6498 ZX= 339.6181  
 XY= -17.4482 YY= -15.8474 ZY= -396.1723  
 XZ= 348.9727 YZ= -384.4146 ZZ= -469.5048  
 Eigenvalues: -807.5266 -37.5571 331.8760

2 P Isotropic = -69.8524 Anisotropy = 607.1623  
 XX= 18.6267 YX= -59.8306 ZX= 274.5838  
 XY= 43.0140 YY= 134.5027 ZY= -330.7850  
 XZ= 375.5551 YZ= -191.4718 ZZ= -362.6868  
 Eigenvalues: -616.7942 72.3144 334.9224

3 P Isotropic = 221.0956 Anisotropy = 71.9994  
 XX= 200.2721 YX= -28.6634 ZX= -72.2734  
 XY= -22.7864 YY= 259.3148 ZY= -116.6293  
 XZ= 0.3443 YZ= 84.2002 ZZ= 203.6999  
 Eigenvalues: 157.2382 236.9534 269.0952

4 P Isotropic = 183.7899 Anisotropy = 267.0243  
 XX= 86.3936 YX= -81.0954 ZX= 34.2066  
 XY= -50.0788 YY= 241.9601 ZY= 20.1087  
 XZ= 121.5793 YZ= 237.6219 ZZ= 223.0161  
 Eigenvalues: -7.2582 196.8218 361.8061

SCF GIAO Magnetic shielding tensor (ppm) of  $\delta_F$ :

1 P Isotropic = -201.9815 Anisotropy = 771.3722  
 XX= -402.4096 YX= -116.9259 ZX= 426.0680  
 XY= 45.9956 YY= -63.2532 ZY= -222.7321  
 XZ= 592.4922 YZ= -92.7916 ZZ= -140.2817  
 Eigenvalues: -803.7596 -114.4516 312.2666

2 P Isotropic = -59.3690 Anisotropy = 533.8178  
 XX= -174.3099 YX= 155.5170 ZX= 458.4052  
 XY= 31.5297 YY= 108.8254 ZY= -160.0280  
 XZ= 311.3146 YZ= -245.7478 ZZ= -112.6225  
 Eigenvalues: -591.1564 116.5398 296.5095

3 P Isotropic = 246.9993 Anisotropy = 187.8381  
 XX= 367.1235 YX= 2.2961 ZX= 70.9275  
 XY= 17.8327 YY= 226.8782 ZY= 22.0074  
 XZ= -16.0218 YZ= 66.8816 ZZ= 146.9960  
 Eigenvalues: 125.3367 243.4364 372.2246

4 P Isotropic = 198.7662 Anisotropy = 153.2161  
 XX= 72.0511 YX= -48.3251 ZX= -55.5549  
 XY= -0.8711 YY= 279.6321 ZY= 52.1939  
 XZ= -75.3281 YZ= -13.3344 ZZ= 244.6152  
 Eigenvalues: 48.7538 246.6345 300.9102

SCF GIAO Magnetic shielding tensor (ppm) of  $\delta_G$ :

1 P Isotropic = -194.5743 Anisotropy = 725.7792  
 XX= 3.2119 YX= -30.6732 ZX= 169.9870  
 XY= 237.1601 YY= -631.9848 ZY= 347.4984  
 XZ= 26.9588 YZ= 443.8217 ZZ= 45.0500  
 Eigenvalues: -817.6193 -55.3821 289.2785

2 P Isotropic = -48.5092 Anisotropy = 543.2884  
 XX= 181.1420 YX= 78.1120 ZX= 43.2829  
 XY= -58.9144 YY= -370.5980 ZY= 450.4711  
 XZ= 149.3096 YZ= 274.7016 ZZ= 43.9285  
 Eigenvalues: -583.1012 123.8906 313.6831

3 P Isotropic = 258.2090 Anisotropy = 280.3469  
 XX= 213.9466 YX= 52.5432 ZX= 33.1040  
 XY= -13.7775 YY= 437.0310 ZY= 23.7008  
 XZ= 9.4634 YZ= -118.0666 ZZ= 123.6495  
 Eigenvalues: 111.1118 218.4083 445.1070

4 P Isotropic = 216.7314 Anisotropy = 88.6366  
 XX= 121.8989 YX= 60.2986 ZX= -0.7586  
 XY= -108.6366 YY= 264.7216 ZY= 57.7394  
 XZ= -47.7671 YZ= -81.0491 ZZ= 263.5737  
 Eigenvalues: 113.4629 260.9089 275.8225

SCF GIAO Magnetic shielding tensor (ppm) of  $\delta_H$ :

1 P Isotropic = -197.8781 Anisotropy = 769.5475  
 XX= -200.4592 YX= 63.6139 ZX= 125.4961  
 XY= 207.9783 YY= -171.6208 ZY= -521.1423  
 XZ= 284.3087 YZ= -493.0677 ZZ= -221.5544  
 Eigenvalues: -801.9689 -106.8191 315.1535

2 P Isotropic = -60.5065 Anisotropy = 579.3606  
 XX= 94.9106 YX= 139.6322 ZX= 182.6550  
 XY= 23.8675 YY= -79.4746 ZY= -494.1445  
 XZ= -25.7842 YZ= -425.4426 ZZ= -196.9556  
 Eigenvalues: -619.5849 112.3314 325.7338

3 P Isotropic = 181.4274 Anisotropy = 94.1671  
 XX= 179.2632 YX= 57.0595 ZX= -35.9818  
 XY= 58.7406 YY= 158.6242 ZY= 28.1513  
 XZ= -25.6838 YZ= 82.9317 ZZ= 206.3947  
 Eigenvalues: 79.2843 220.7924 244.2055

4 P Isotropic = 260.1761 Anisotropy = 313.9210  
 XX= 218.0328 YX= -9.1466 ZX= -29.3512  
 XY= -119.2502 YY= 438.1163 ZY= -143.5998  
 XZ= -81.1534 YZ= -25.7085 ZZ= 124.3792  
 Eigenvalues: 69.3293 241.7423 469.4568



SCF GIAO Magnetic shielding tensor (ppm) of **8<sub>1</sub>**:

1 P Isotropic = -168.8547 Anisotropy = 736.8264  
 XX= -11.8217 YX= -303.8990 ZX= 143.9955  
 XY= -138.2512 YY= -655.5614 ZY= -194.6958  
 XZ= 141.1813 YZ= -195.4543 ZZ= 160.8191  
 Eigenvalues: -748.2338 -80.6931 322.3630  
 2 P Isotropic = -73.1320 Anisotropy = 606.6993  
 XX= 56.6854 YX= -218.2304 ZX= 129.0635  
 XY= -383.2621 YY= -501.3761 ZY= 16.3705  
 XZ= 74.5014 YZ= -164.3604 ZZ= 225.2948  
 Eigenvalues: -633.4720 82.7419 331.3343

3 P Isotropic = 237.8458 Anisotropy = 82.5189  
 XX= 195.8515 YX= 45.1910 ZX= -103.0502  
 XY= 14.3433 YY= 261.4139 ZY= -41.6967  
 XZ= 9.8029 YZ= 105.8807 ZZ= 256.2721  
 Eigenvalues: 154.2217 266.4573 292.8585  
 4 P Isotropic = 244.2787 Anisotropy = 331.7821  
 XX= 170.1971 YX= -35.6105 ZX= 9.9586  
 XY= -23.9621 YY= 232.6443 ZY= 83.9367  
 XZ= 164.5087 YZ= 251.2228 ZZ= 329.9946  
 Eigenvalues: 53.8591 213.5102 465.4668

SCF GIAO Magnetic shielding tensor (ppm) of *syn*-[**1**(AuCl)]:

1 P Isotropic = 17.6210 Anisotropy = 421.3286  
 XX= -315.3101 YX= 140.9516 ZX= -138.9675  
 XY= 167.4091 YY= 228.7602 ZY= -22.8288  
 XZ= -93.1153 YZ= -49.3283 ZZ= 139.4128  
 Eigenvalues: -376.7792 131.1354 298.5067

2 P Isotropic = -113.4495 Anisotropy = 692.9322  
 XX= -525.8946 YX= 324.7324 ZX= -2.1870  
 XY= 244.2542 YY= 143.1606 ZY= -180.9703  
 XZ= -65.7643 YZ= -167.7368 ZZ= 42.3857  
 Eigenvalues: -631.7602 -57.0936 348.5054

SCF GIAO Magnetic shielding tensor (ppm) of *anti*-[**1**(AuCl)]:

1 P Isotropic = 14.3982 Anisotropy = 413.7721  
 XX= -303.5011 YX= -230.4804 ZX= -44.2684  
 XY= -179.9422 YY= 204.0588 ZY= -62.7342  
 XZ= -12.1002 YZ= -51.2450 ZZ= 142.6369  
 Eigenvalues: -380.0855 133.0338 290.2463

2 P Isotropic = -135.7075 Anisotropy = 723.1981  
 XX= -611.3188 YX= -195.0824 ZX= 168.7439  
 XY= -264.3457 YY= 221.2657 ZY= -114.1681  
 XZ= 121.0099 YZ= -125.7324 ZZ= -17.0694  
 Eigenvalues: -689.2842 -64.2629 346.4246

SCF GIAO Magnetic shielding tensor (ppm) of **2**:

1 P Isotropic = -158.9408 Anisotropy = 787.5404  
 XX= -226.0544 YX= -595.6506 ZX= -12.4108  
 XY= -597.3358 YY= -271.6427 ZY= -120.4618  
 XZ= 68.5706 YZ= -48.1085 ZZ= 20.8748  
 Eigenvalues: -847.7481 4.8397 366.0862  
 2 P Isotropic = -137.8821 Anisotropy = 752.7701  
 XX= -120.7784 YX= -520.1573 ZX= 1.1854  
 XY= -557.4170 YY= -332.0914 ZY= -168.4450  
 XZ= 53.5660 YZ= -125.1812 ZZ= 39.2234  
 Eigenvalues: -786.7949 9.1839 363.9646

3 P Isotropic = -233.3531 Anisotropy = 860.2944  
 XX= -315.8077 YX= -664.8014 ZX= 60.5062  
 XY= -668.7644 YY= -365.6881 ZY= -32.6611  
 XZ= 62.5236 YZ= -41.4850 ZZ= -18.5636  
 Eigenvalues: -1008.2559 -31.9799 340.1765  
 4 P Isotropic = -242.4649 Anisotropy = 871.0814  
 XX= -243.8035 YX= -679.3387 ZX= 52.4307  
 XY= -632.6067 YY= -491.4750 ZY= -108.5773  
 XZ= 60.6357 YZ= -106.8599 ZZ= 7.8838  
 Eigenvalues: -1037.3182 -28.3325 338.2560

SCF GIAO Magnetic shielding tensor (ppm) of PMe<sub>3</sub>:

1 P Isotropic = 376.0647 Anisotropy = 15.8424  
 XX= 386.4302 YX= 0.0000 ZX= 0.0000  
 XY= 0.0000 YY= 386.6234 ZY= -0.2031  
 XZ= 0.0000 YZ= -0.4020 ZZ= 355.1404  
 Eigenvalues: 355.1375 386.4302 386.6263

#### 5-4. Estimation of the Dissociation Energies of the Pd–Cl bond in **8<sub>E</sub>** and P–Cl bond in **8<sub>A</sub>**.

The bond dissociation energies of the Pd–Cl bond in **8<sub>E</sub>** and the P<sup>4</sup>–Cl bond in **8<sub>A</sub>** were estimated by changing the Pd–Cl bond and P<sup>4</sup>–Cl bond distances from the values of the optimized structure to 5.0 Å (M06/SDD (Pd) and 6-31G(d) (P,Cl,C,H) level). The molecular structures were optimized with the fixation of the Pd–Cl bond (for **8<sub>E</sub>**) and the P<sup>4</sup>–Cl bond (for **8<sub>A</sub>**). The results were shown in Figure S33 and Table S9.

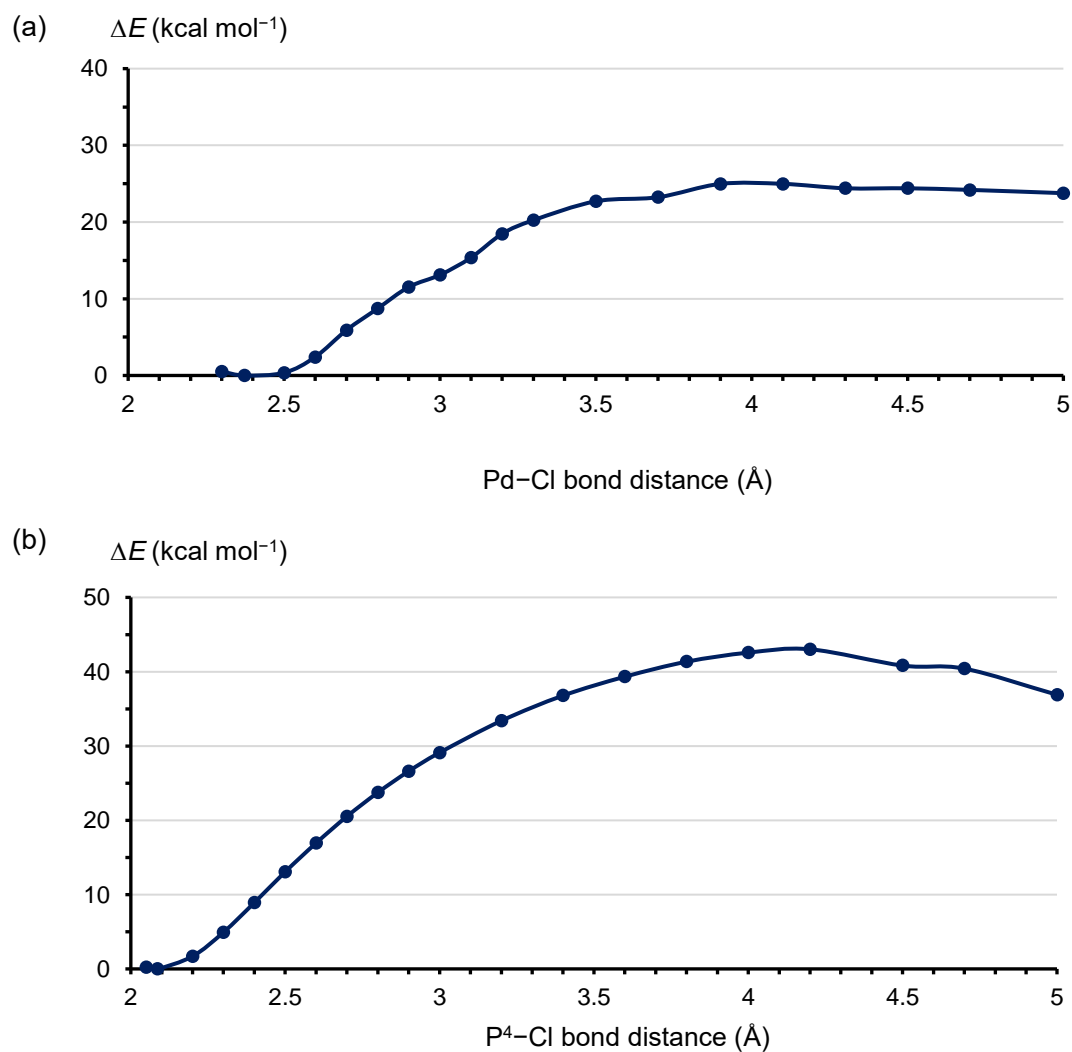

**Figure S33.** The bond dissociation energies of (a) the Pd–Cl bond in **8<sub>E</sub>** and (b) the P<sup>4</sup>–Cl bond in **8<sub>A</sub>**.

**Table S9.** Uncorrected energies of stationary points (Hartree).<sup>a</sup>

| Compound <b>8E</b>  |                |            | Compound <b>8A</b>               |                |            |
|---------------------|----------------|------------|----------------------------------|----------------|------------|
| Pd–Cl bond distance | <i>E</i>       | $\Delta E$ | P <sup>4</sup> –Cl bond distance | <i>E</i>       | $\Delta E$ |
| 2.3                 | -5435.39783889 | 0.5        | 2.05                             | -5435.39995068 | 0.2        |
| 2.373 <sup>*a</sup> | -5435.39866264 | 0.0        | 2.086 <sup>*a</sup>              | -5435.40029569 | 0.0        |
| 2.5                 | -5435.39809834 | 0.4        | 2.2                              | -5435.39758780 | 1.7        |
| 2.6                 | -5435.39482384 | 2.4        | 2.3                              | -5435.39244067 | 4.9        |
| 2.7                 | -5435.38925810 | 5.9        | 2.4                              | -5435.38609185 | 8.9        |
| 2.8                 | -5435.38476805 | 8.7        | 2.5                              | -5435.37947070 | 13.1       |
| 2.9                 | -5435.38028529 | 11.5       | 2.6                              | -5435.37330307 | 16.9       |
| 3.0                 | -5435.37777747 | 13.1       | 2.7                              | -5435.36758281 | 20.5       |
| 3.1                 | -5435.37416942 | 15.4       | 2.8                              | -5435.36246777 | 23.7       |
| 3.2                 | -5435.36922050 | 18.5       | 2.9                              | -5435.35790445 | 26.6       |
| 3.3                 | -5435.36640794 | 20.2       | 3.0                              | -5435.35391562 | 29.1       |
| 3.5                 | -5435.36247805 | 22.7       | 3.2                              | -5435.34708321 | 33.4       |
| 3.7                 | -5435.36162834 | 23.2       | 3.4                              | -5435.34167404 | 36.8       |
| 3.9                 | -5435.35885944 | 25.0       | 3.6                              | -5435.33762978 | 39.3       |
| 4.1                 | -5435.35885283 | 25.0       | 3.8                              | -5435.33441002 | 41.3       |
| 4.3                 | -5435.35977248 | 24.4       | 4.0                              | -5435.33246260 | 42.6       |
| 4.5                 | -5435.35977260 | 24.4       | 4.2                              | -5435.33173764 | 43.0       |
| 4.7                 | -5435.36010915 | 24.2       | 4.5                              | -5435.33523778 | 40.8       |
| 5.0                 | -5435.36079031 | 23.8       | 4.7                              | -5435.33589309 | 40.4       |
|                     |                |            | 5.0                              | -5435.34149062 | 36.9       |

a) Optimized structure.

**Table S10.** Uncorrected and thermal-corrected (298 K) energies of stationary points (Hartree).<sup>a</sup>

| Structure                                     | <i>E</i>       | <i>E</i> + ZPE | <i>H</i>     | <i>G</i>     | $\Delta G^b$ |
|-----------------------------------------------|----------------|----------------|--------------|--------------|--------------|
| $\eta^1/\eta^1$ -[ <b>8</b> -Cl] <sup>+</sup> | -4975.02875099 | -4973.599356   | -4973.515317 | -4973.714562 | 0.0          |
| $\eta^1/\eta^2$ -[ <b>8</b> -Cl] <sup>+</sup> | -4975.00061517 | -4973.574223   | -4973.489490 | -4973.692544 | 13.8         |

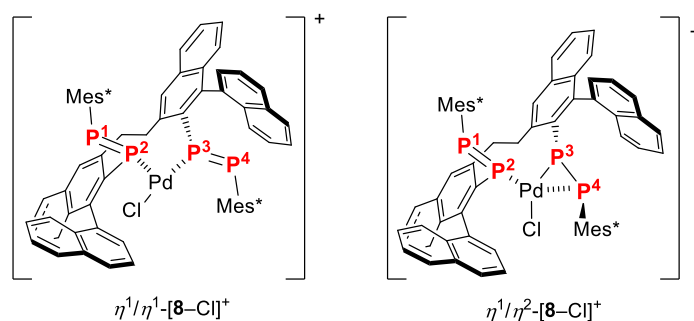

### 5-5. Optimization of Local Minima of Model Palladium Complexes.

The model palladium complexes **8<sub>A-R</sub>**, **8<sub>E-R</sub>**, **10<sub>A-R</sub>**, **10<sub>E-R</sub>**, **11<sub>A-R</sub>**, and **11<sub>E-R</sub>** were optimized at M06/SDD (Pd) and 6-31G(d) (P,Cl,C,H) level of theory. The symbol R represents the substituent on the phosphorus atom instead of the Mes\* group for **8** and **10** and both substituents on phosphorus atoms for **11**. Compounds **10<sub>R</sub>** were derivatives of **8** replaced the ethylene linker with the two hydrogens without ethylene linker.

**Table S11.** Relative energies (kcal mol<sup>-1</sup>) of palladium complexes **8**, **10**, and **11**.

|                                                             | (R = H) | (R = Me) | (R = Ph) | (R = Mes) | (R = Mes*)     |
|-------------------------------------------------------------|---------|----------|----------|-----------|----------------|
| <b>8<sub>A-R</sub></b>                                      | 0.0     | 0.0      | 0.0      | 0.0       | 0.0            |
| <b>8<sub>E-R</sub></b>                                      | 4.5     | 11.4     | 11.7     | 4.0       | 3.6            |
| <b>Compounds without ethylene linker</b>                    |         |          |          |           |                |
| <b>10<sub>A-R</sub></b>                                     | 0.0     | 0.0      | 0.0      | 0.0       | 0.0            |
| <b>10<sub>E-R</sub></b>                                     | 0.6     | 2.1      | 7.1      | 4.6       | 1.8            |
| <b>Compounds with same substituents on phosphorus atoms</b> |         |          |          |           |                |
| <b>11<sub>A-R</sub></b>                                     | 0.0     | 0.0      | 0.0      | 0.0       | — <sup>a</sup> |
| <b>11<sub>E-R</sub></b>                                     | 11.0    | 9.4      | 11.5     | 1.9       | — <sup>a</sup> |

a) Not calculated.

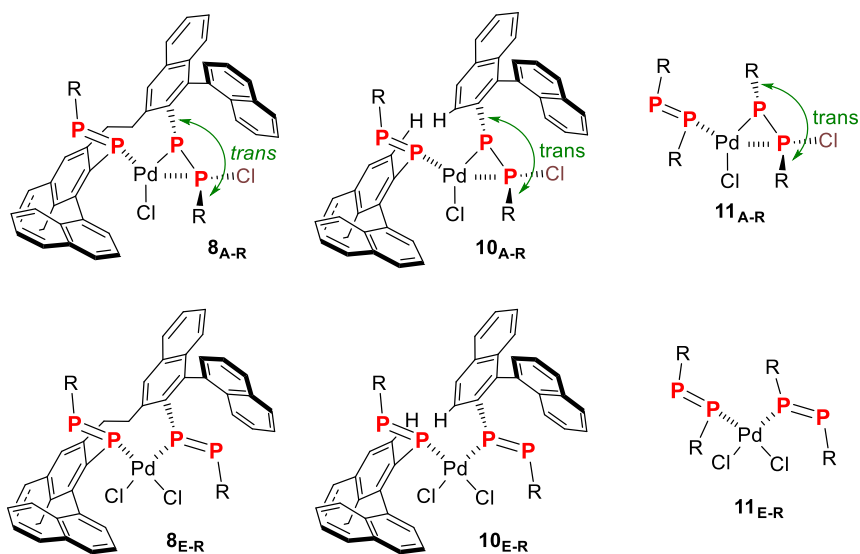

R = H, Me, Ph, Mes, Mes\*

**Table S12.** Uncorrected and thermal-corrected (298 K) energies of stationary points (Hartree).<sup>a</sup>

| Structure                  | $E$            | $E + ZPE$    | $H$          | $G$          |
|----------------------------|----------------|--------------|--------------|--------------|
| <b>Compound 8</b>          |                |              |              |              |
| <b>8<sub>A-H</sub></b>     | -4030.94958315 | -4030.357114 | -4030.312966 | -4030.436720 |
| <b>8<sub>E-H</sub></b>     | -4030.94357170 | -4030.351667 | -4030.307382 | -4030.429504 |
| <b>8<sub>A-Me</sub></b>    | -4109.53449380 | -4108.884750 | -4108.836887 | -4108.968538 |
| <b>8<sub>E-Me</sub></b>    | -4109.51785073 | -4108.867873 | -4108.820022 | -4108.950451 |
| <b>8<sub>A-Ph</sub></b>    | -4492.70809157 | -4491.950017 | -4491.896621 | -4492.038977 |
| <b>8<sub>E-Ph</sub></b>    | -4492.68691300 | -4491.929518 | -4491.875499 | -4492.020316 |
| <b>8<sub>A-Mes</sub></b>   | -4728.41486929 | -4727.489690 | -4727.427527 | -4727.585365 |
| <b>8<sub>E-Mes</sub></b>   | -4728.40825335 | -4727.483596 | -4727.420825 | -4727.578980 |
| <b>Compound 10</b>         |                |              |              |              |
| <b>10<sub>A-H</sub></b>    | -3953.58215459 | -3953.026309 | -3952.982956 | -3953.107866 |
| <b>10<sub>E-H</sub></b>    | -3953.58726742 | -3953.030606 | -3952.987796 | -3953.106939 |
| <b>10<sub>A-Me</sub></b>   | -4032.16439481 | -4031.549905 | -4031.503367 | -4031.632767 |
| <b>10<sub>E-Me</sub></b>   | -4032.15984624 | -4031.546343 | -4031.499543 | -4031.629360 |
| <b>10<sub>A-Ph</sub></b>   | -4415.34048159 | -4414.619760 | -4414.567080 | -4414.709088 |
| <b>10<sub>E-Ph</sub></b>   | -4415.32586660 | -4414.605762 | -4414.552433 | -4414.697704 |
| <b>10<sub>A-Mes</sub></b>  | -4651.05356080 | -4650.163318 | -4650.102404 | -4650.258373 |
| <b>10<sub>E-Mes</sub></b>  | -4651.04211587 | -4650.154173 | -4650.092365 | -4650.251049 |
| <b>10<sub>A-Mes*</sub></b> | -5358.03327652 | -5356.640456 | -5356.554932 | -5356.760573 |
| <b>10<sub>E-Mes*</sub></b> | -5358.03399372 | -5356.640102 | -5356.555240 | -5356.757641 |
| <b>Compound 11</b>         |                |              |              |              |
| <b>11<sub>A-H</sub></b>    | -2416.00350452 | -2415.960571 | -2415.947145 | -2416.003314 |
| <b>11<sub>E-H</sub></b>    | -2415.98617348 | -2415.943421 | -2415.929853 | -2415.985835 |
| <b>11<sub>A-Me</sub></b>   | -2573.16332906 | -2573.004786 | -2572.984109 | -2573.056349 |
| <b>11<sub>E-Me</sub></b>   | -2573.14866026 | -2572.989943 | -2572.969286 | -2573.041433 |
| <b>11<sub>A-Ph</sub></b>   | -3339.50484278 | -3339.132039 | -3339.099335 | -3339.199596 |
| <b>11<sub>E-Ph</sub></b>   | -3339.48583628 | -3339.112840 | -3339.079882 | -3339.181238 |
| <b>11<sub>A-Mes</sub></b>  | -3810.91848547 | -3810.211473 | -3810.160726 | -3810.294704 |
| <b>11<sub>E-Mes</sub></b>  | -3810.90529616 | -3810.202376 | -3810.149733 | -3810.291674 |

a)  $E$ : electronic energy;  $ZPE$ : zero-point energy;  $H$  ( $= E + ZPE + E_{\text{vib}} + E_{\text{rot}} + E_{\text{trans}} + RT$ ): sum of electronic and thermal enthalpies;  $G$  ( $= H - TS$ ): sum of electronic and thermal free energies. b) kcal mol<sup>-1</sup>.

**Table S13.** Atomic coordinates of the optimized structures.

2

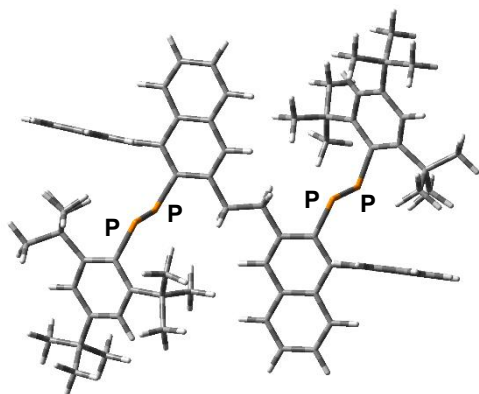

|   |             |             |             |   |             |             |             |
|---|-------------|-------------|-------------|---|-------------|-------------|-------------|
| P | -3.72687400 | 0.43860700  | -0.74887500 | C | 6.98820200  | 1.09081400  | -0.31560900 |
| P | -4.53422100 | 0.18586600  | 1.11893800  | C | -7.01552000 | -0.97279300 | 0.24158900  |
| P | 3.79958500  | -0.56783400 | 0.16669900  | C | 2.60117800  | -5.71624900 | -0.76571800 |
| P | 4.84552600  | -0.35115700 | -1.57957600 | H | 3.64499500  | -5.97805800 | -0.60635800 |
| C | -5.71977500 | -1.22120500 | 0.76806800  | C | -7.24499600 | -3.34626900 | -0.32530900 |
| C | -2.48938500 | 1.76784100  | -0.31607900 | C | 5.72560700  | 3.54686600  | -0.62505100 |
| C | 2.68120600  | -1.98377400 | -0.30007700 | H | 5.25065600  | 4.51608200  | -0.76034700 |
| C | 5.80375800  | 1.18093900  | -1.09284200 | C | 0.80749400  | -0.26406800 | -0.26134700 |
| C | -1.91248400 | 4.12349900  | 0.02433200  | H | 1.22242000  | 0.36050100  | -1.07177800 |
| C | -2.86315200 | 3.10380300  | -0.29955100 | H | 1.26396700  | 0.13098800  | 0.66075700  |
| C | 2.20812700  | -4.35527200 | -0.68737500 | C | 0.01550700  | 6.05459600  | 0.72903400  |
| C | 5.23509900  | 2.46009800  | -1.34805400 | H | 0.74938500  | 6.80859300  | 1.00854500  |
| C | -0.23035900 | 2.37276300  | 0.29083100  | C | 0.35805300  | 4.72672600  | 0.71883400  |
| H | 0.80565900  | 2.12157200  | 0.51622200  | H | 1.36543600  | 4.40671000  | 0.98872300  |
| C | -4.88654700 | 3.98651200  | 1.68155300  | C | 1.28092000  | -1.68588400 | -0.43770700 |
| H | -3.93328500 | 3.58241800  | 2.01968300  | C | -5.16490800 | 4.01270000  | 0.29190200  |
| C | -2.23046400 | 5.50554700  | 0.02473500  | C | 1.68494300  | -6.70259900 | -1.03438900 |
| H | -3.23452300 | 5.82069000  | -0.25249300 | H | 2.00923900  | -7.74052900 | -1.08719600 |
| C | 3.13027400  | -3.29240000 | -0.42079800 | C | -4.23568700 | 3.53885900  | -0.68277400 |
| C | 0.83368800  | -4.04265400 | -0.86852800 | C | -7.03913900 | 4.97432700  | 2.16017800  |
| C | -1.12620200 | 1.39445500  | -0.06212200 | H | -7.75518100 | 5.34483500  | 2.89175200  |
| C | -6.41928200 | 4.53467700  | -0.14346400 | C | -5.80075400 | 4.45452800  | 2.59250000  |
| C | -0.58721400 | 3.73769700  | 0.35757600  | H | -5.57019200 | 4.42358700  | 3.65580100  |
| C | -7.71862800 | -2.04450200 | -0.31998700 | C | -0.08605300 | -5.07797600 | -1.15699100 |
| H | -8.68136500 | -1.84366100 | -0.77700500 | H | -1.13329300 | -4.81308900 | -1.30678100 |
| C | 6.77805800  | 3.45844200  | 0.27835500  | C | -7.74710300 | 0.38822500  | 0.23844100  |
| C | -0.69766000 | -0.04855800 | -0.19778000 | C | 7.41867500  | 2.23204200  | 0.36922600  |
| H | -1.11608600 | -0.64480100 | 0.63152500  | H | 8.28853900  | 2.14747300  | 1.01237300  |
| H | -1.16513600 | -0.45928300 | -1.10845700 | C | 7.87029900  | -0.16677100 | -0.15743600 |
| C | -6.05158800 | -3.57822100 | 0.34901600  | C | 8.35572700  | 4.39260600  | 2.03123900  |
| H | -5.70133800 | -4.60438100 | 0.41943100  | H | 8.09213100  | 3.61128200  | 2.75741900  |
| C | -1.29077600 | 6.44535400  | 0.36861800  | H | 8.60857900  | 5.29978200  | 2.59676800  |
| H | -1.55626500 | 7.50113800  | 0.36388600  | H | 9.26186900  | 4.07506600  | 1.49698200  |
| C | -4.57771200 | 3.57651800  | -2.01799100 | C | -5.82202700 | 4.08524500  | -2.44490800 |
| H | -3.85633000 | 3.22313500  | -2.75495000 | H | -6.05716300 | 4.10483000  | -3.50743100 |
| C | 0.40957600  | -2.70147200 | -0.73707400 | C | -7.33937600 | 5.01002800  | 0.82175500  |
| H | -0.65235200 | -2.49733300 | -0.87030800 | H | -8.29434500 | 5.40786900  | 0.47655900  |
| C | -5.28288400 | -2.56947400 | 0.92713200  | C | -6.71911700 | 4.56449000  | -1.52684200 |
| C | 0.32769300  | -6.38275700 | -1.24195600 | H | -7.67995900 | 4.97099900  | -1.84425300 |
| H | -0.38857100 | -7.17232700 | -1.46271500 | C | 5.30179500  | -4.00186500 | -1.38182900 |

|   |             |             |             |   |             |             |             |
|---|-------------|-------------|-------------|---|-------------|-------------|-------------|
| H | 4.83667000  | -3.91197600 | -2.36392200 | C | -2.85166300 | -3.15173500 | 0.68017900  |
| C | 4.56327400  | -3.67047900 | -0.26572400 | H | -2.66334900 | -2.19497300 | 0.17615000  |
| C | 5.15300300  | -3.79911600 | 1.02670000  | H | -3.08142700 | -3.89589500 | -0.09628600 |
| C | 7.20359700  | 4.68881600  | 1.07382900  | H | -1.92725800 | -3.46337700 | 1.19113500  |
| C | -7.99308600 | -4.50693100 | -0.97403600 | C | 9.35615300  | 0.23223200  | -0.08139400 |
| C | 7.52004700  | -0.91032800 | 1.13644600  | H | 9.61967700  | 0.75372600  | 0.84631800  |
| H | 6.49106900  | -1.29382300 | 1.12971800  | H | 9.64581000  | 0.87041000  | -0.92746900 |
| H | 7.62630500  | -0.24957200 | 2.00790600  | H | 9.97413800  | -0.67498300 | -0.11313600 |
| H | 8.19326800  | -1.76992800 | 1.27556700  | C | -9.26585400 | -4.05342500 | -1.68569500 |
| C | 6.50163100  | -4.25602700 | 1.13081000  | H | -9.98871800 | -3.60648300 | -0.98921700 |
| C | 6.01595200  | 5.19018900  | 1.90363700  | H | -9.75386300 | -4.91798300 | -2.15590800 |
| H | 5.16004200  | 5.46743800  | 1.27434200  | H | -9.05216900 | -3.32171500 | -2.47706400 |
| H | 6.30396800  | 6.07867200  | 2.48396500  | C | -8.38704100 | -5.52693000 | 0.10047600  |
| H | 5.67700400  | 4.41765200  | 2.60730900  | H | -7.51168600 | -5.93652300 | 0.62125400  |
| C | 4.09918000  | 2.79382700  | -2.34418600 | H | -8.93000500 | -6.36887900 | -0.35298100 |
| C | -4.01103900 | -3.03634600 | 1.67425400  | H | -9.03992300 | -5.06670800 | 0.85488700  |
| C | -4.22269200 | -4.42269500 | 2.30981600  | C | 2.80303400  | 3.03591700  | -1.56421200 |
| H | -3.35218300 | -4.66983900 | 2.93137600  | H | 1.96200900  | 3.23238500  | -2.24627900 |
| H | -4.31330100 | -5.23077300 | 1.57470900  | H | 2.89366800  | 3.89743400  | -0.88820200 |
| H | -5.11432700 | -4.44014500 | 2.95139500  | H | 2.54959100  | 2.15806100  | -0.95310900 |
| C | 7.77864000  | -1.12118600 | -1.34991000 | C | -3.60579500 | -2.12902200 | 2.84184400  |
| H | 8.54744400  | -1.90117000 | -1.25572100 | H | -3.17591000 | -1.16987500 | 2.53069300  |
| H | 7.94165300  | -0.59274300 | -2.30009300 | H | -2.83291000 | -2.62918800 | 3.44129900  |
| H | 6.82476300  | -1.65952300 | -1.41419900 | H | -4.45927500 | -1.91535500 | 3.50046800  |
| C | 3.83232000  | 1.73971700  | -3.42365200 | C | -9.26905200 | 0.18856000  | 0.36654500  |
| H | 3.19191300  | 2.18027900  | -4.20068800 | H | -9.52431700 | -0.44616500 | 1.22620900  |
| H | 3.29572500  | 0.85763500  | -3.05456600 | H | -9.72836300 | -0.24550900 | -0.52980200 |
| H | 4.75787000  | 1.40214100  | -3.91030400 | H | -9.74539100 | 1.16667600  | 0.51456400  |
| C | 7.65688100  | 5.79196900  | 0.11083900  | C | -7.36714800 | 1.27584900  | 1.42612500  |
| H | 8.51038700  | 5.45589000  | -0.49391100 | H | -7.46607900 | 0.73385800  | 2.37754100  |
| H | 7.96692500  | 6.68548400  | 0.67191100  | H | -8.03039000 | 2.15151800  | 1.46101900  |
| H | 6.85700500  | 6.09234800  | -0.57870000 | H | -6.35005600 | 1.68278800  | 1.37294400  |
| C | -7.49215200 | 1.12726000  | -1.07924300 | C | 5.05996500  | -3.59247100 | 3.44385700  |
| H | -8.05787800 | 2.07103400  | -1.10004900 | H | 4.50674900  | -3.34050300 | 4.34680400  |
| H | -7.81350600 | 0.51644100  | -1.93463400 | C | 7.21831200  | -4.58575900 | -0.04338900 |
| H | -6.43215400 | 1.37272800  | -1.22143200 | H | 8.24637800  | -4.93689400 | 0.05282300  |
| C | 4.45864300  | 4.06982300  | -3.12867300 | C | -7.08637100 | -5.18069700 | -2.01018400 |
| H | 5.39736500  | 3.93668300  | -3.68386500 | H | -6.79456100 | -4.47028100 | -2.79568100 |
| H | 4.56340100  | 4.96112600  | -2.50083400 | H | -7.61133900 | -6.02086300 | -2.48727400 |
| H | 3.66320900  | 4.28757900  | -3.85418200 | H | -6.16708200 | -5.57640000 | -1.55947200 |
| C | 4.45140500  | -3.48679800 | 2.21856600  | C | 7.09592200  | -4.36326800 | 2.41105100  |
| H | 3.41567500  | -3.15793400 | 2.14778100  | H | 8.12781800  | -4.71042800 | 2.47600300  |
| C | 6.63073300  | -4.46013500 | -1.27553700 | C | 6.39730200  | -4.03140500 | 3.54327000  |
| H | 7.18605500  | -4.70762200 | -2.17875600 | H | 6.86901600  | -4.11131200 | 4.52109100  |

7A<sup>+</sup>

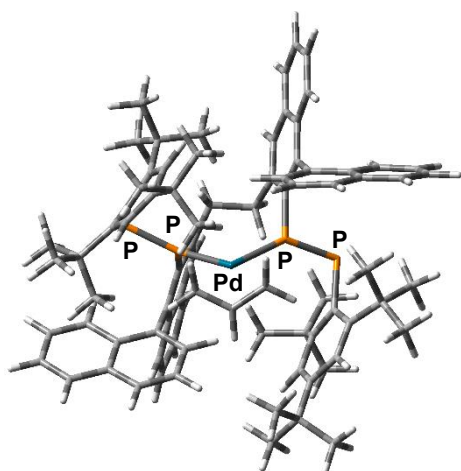

|   |             |             |             |   |             |             |             |
|---|-------------|-------------|-------------|---|-------------|-------------|-------------|
| C | 5.99250300  | -3.27054600 | 3.10549800  | C | 1.93020200  | -0.24531700 | 3.30168400  |
| C | 6.93462800  | 1.66502000  | 0.59195100  | H | 3.64887900  | -2.12319300 | -2.89909200 |
| C | 4.25342800  | -1.67880900 | 2.52709700  | C | -1.19389800 | 5.08956300  | -3.33558700 |
| C | 5.26977600  | 0.02771100  | -0.07402100 | H | 2.65938300  | -2.11839000 | -0.61206300 |
| C | 4.11286200  | -0.76645400 | 0.19671400  | C | -1.84560300 | -0.04610300 | 3.36652300  |
| C | 3.57740400  | -0.84466900 | 1.58451700  | C | -2.48228600 | 0.69517000  | 4.33199300  |
| C | 4.11100900  | -1.52478600 | -2.11432400 | C | -2.39830100 | -0.07190700 | 2.04735800  |
| C | 5.24943500  | -0.80804700 | -2.38143400 | C | -3.63008100 | 1.46819000  | 4.04660600  |
| C | 5.85267800  | -0.01522000 | -1.37570700 | H | -2.07659900 | 0.71857800  | 5.34597400  |
| C | 6.99807400  | 0.77192800  | -1.64745200 | C | -3.51706800 | 0.68103000  | 1.72128800  |
| C | 7.52566500  | 1.60092700  | -0.68882400 | C | -4.14984100 | 1.48208000  | 2.71923600  |
| H | 8.39769400  | 2.21216000  | -0.91343000 | C | -4.24101100 | 2.27330600  | 5.03896800  |
| H | 7.43912900  | 0.72011400  | -2.64314200 | C | -4.03241100 | 0.72325300  | 0.32422000  |
| H | 5.69982200  | -0.82836100 | -3.37374500 | P | -2.46877700 | -2.92034500 | 1.00363600  |
| C | 5.51338400  | -3.32636100 | 4.43285500  | C | -5.25761500 | 2.32091300  | 2.43286500  |
| C | 4.42371400  | -2.57909600 | 4.80280200  | C | -5.31067300 | 3.07514600  | 4.72992800  |
| C | 3.76515900  | -1.74737500 | 3.86426000  | H | -3.83378200 | 2.25161300  | 6.04962900  |
| H | 6.00880500  | -3.96792900 | 5.15903700  | C | -5.21194200 | 0.01056300  | -0.04998800 |
| H | 4.03892200  | -2.62049100 | 5.82159900  | C | -3.38348700 | 1.50241600  | -0.61324500 |
| C | 2.60745900  | -1.01693200 | 4.21394100  | C | -1.52979100 | -3.89564200 | -0.26511700 |
| H | 2.22964700  | -1.09424800 | 5.23593500  | C | -5.82030200 | 3.10062600  | 3.41256700  |
| C | 5.84228300  | 0.88837000  | 0.89652000  | H | -5.65333900 | 2.35037500  | 1.41894800  |
| H | 5.40046700  | 0.93712000  | 1.89122500  | H | -5.76768800 | 3.69717400  | 5.49718500  |
| C | 5.38097200  | -2.46595200 | 2.17657500  | C | -5.71829900 | 0.15757300  | -1.37675100 |
| H | 5.75608100  | -2.43549500 | 1.15509000  | C | -5.88047900 | -0.86892100 | 0.83857200  |
| H | 7.35191800  | 2.33154000  | 1.34455100  | C | -3.87326800 | 1.62110600  | -1.93163700 |
| H | 6.85308000  | -3.87177400 | 2.81834700  | H | -2.47684800 | 2.04071300  | -0.32852200 |
| C | 2.44592500  | -0.14136400 | 1.97095400  | C | -2.06876700 | -4.07322400 | -1.57322300 |
| C | 3.54776100  | -1.51444200 | -0.81792900 | C | -0.19630700 | -4.29060800 | 0.00010300  |
| P | 2.41525600  | 2.75872600  | 1.06857200  | H | -6.66538300 | 3.74357700  | 3.17411400  |
| C | 1.44862200  | 3.79275100  | -0.13221900 | C | -5.02494500 | 0.97550900  | -2.30246400 |
| C | 1.97132000  | 4.04213200  | -1.43896900 | C | -6.88770900 | -0.54803300 | -1.75135200 |
| C | 0.13459500  | 4.21360700  | 0.18902000  | C | -6.99605400 | -1.56258500 | 0.43486600  |
| C | 1.07188200  | 4.43046900  | -2.42746700 | H | -5.49158200 | -0.99711300 | 1.84852700  |
| C | -0.71164800 | 4.58171600  | -0.86922400 | H | -3.33897200 | 2.24693500  | -2.64722600 |
| C | -0.28786400 | 4.65328100  | -2.18775100 | C | -1.17245600 | -4.32957900 | -2.60898500 |
| H | 1.44517400  | 4.58957100  | -3.43545000 | C | -3.57753900 | -4.05172200 | -1.90256300 |
| H | -1.73649900 | 4.85683600  | -0.63192000 | C | 0.64464800  | -4.52791300 | -1.09540800 |
| C | -0.43100000 | 4.49496600  | 1.60174500  | C | 0.40619300  | -4.63231700 | 1.38073700  |
| C | 3.47400300  | 3.99737300  | -1.80175600 | H | -5.42113800 | 1.07583900  | -3.31281400 |



|   |             |             |             |    |             |             |             |
|---|-------------|-------------|-------------|----|-------------|-------------|-------------|
| C | -7.51216600 | -1.39385800 | -0.86856100 | H  | -1.19803400 | 6.25034000  | 2.62911900  |
| H | -7.27169200 | -0.41865700 | -2.76342700 | H  | -1.58570300 | 6.25095100  | 0.90306700  |
| H | -7.49030500 | -2.24263100 | 1.12619000  | H  | 0.06689700  | 6.61917400  | 1.43444000  |
| C | 0.20253100  | -4.48676900 | -2.41048600 | C  | 2.56461600  | -5.00121600 | -3.17845400 |
| H | -1.55919600 | -4.40827200 | -3.62197000 | H  | 2.59780800  | -5.96851100 | -2.65763500 |
| H | 1.68402200  | -4.77532900 | -0.89468500 | H  | 3.01151100  | -4.24512100 | -2.51672600 |
| H | -8.40364300 | -1.94039500 | -1.17033700 | H  | 3.20473800  | -5.07850400 | -4.06751800 |
| C | 1.14317600  | -4.63602500 | -3.60274400 | C  | 0.64464700  | -5.72806700 | -4.55537000 |
| C | -0.52151300 | -0.68596100 | 3.67835200  | H  | -0.33829100 | -5.49687200 | -4.98480800 |
| H | -0.55238800 | -1.19875600 | 4.65050200  | H  | 0.57103300  | -6.69520500 | -4.03929300 |
| H | -0.27603900 | -1.45928600 | 2.93625600  | H  | 1.34853200  | -5.84244400 | -5.39149500 |
| P | -1.59921200 | -1.08847000 | 0.74367100  | C  | 1.18818600  | -3.29353200 | -4.34429200 |
| P | 1.59149700  | 0.91758100  | 0.73527700  | H  | 1.52950400  | -2.49063600 | -3.67065000 |
| C | 0.61258000  | 0.36602000  | 3.68560200  | H  | 0.20136100  | -3.00858200 | -4.73556300 |
| H | 0.34578000  | 1.17282300  | 2.98891300  | H  | 1.88643800  | -3.34336100 | -5.19213200 |
| H | 0.67293800  | 0.83261400  | 4.67943800  | C  | -3.88101700 | -4.93958400 | -3.11931000 |
| C | 3.95215000  | 2.58195700  | -2.13526900 | H  | -3.49945100 | -5.96063900 | -2.98240800 |
| H | 3.45869900  | 2.19928300  | -3.04120200 | H  | -3.47207900 | -4.54014400 | -4.05552800 |
| H | 3.77366500  | 1.86776900  | -1.32188100 | H  | -4.96901400 | -4.99950200 | -3.25379400 |
| H | 5.03547400  | 2.58973600  | -2.32661200 | C  | -4.41989100 | -4.62195000 | -0.75354300 |
| C | 4.32799700  | 4.58123100  | -0.66754900 | H  | -5.45733600 | -4.75464100 | -1.08970800 |
| H | 5.36787600  | 4.68655500  | -1.00577100 | H  | -4.47064400 | -3.95908100 | 0.12049400  |
| H | 4.36108100  | 3.94386300  | 0.22586900  | H  | -4.03866500 | -5.59807300 | -0.42307600 |
| H | 3.96317200  | 5.57313300  | -0.36709200 | C  | -4.05607600 | -2.63714100 | -2.23366100 |
| C | 3.77167300  | 4.86771300  | -3.03233600 | H  | -3.57275800 | -2.26497700 | -3.14924900 |
| H | 3.40669600  | 5.89647100  | -2.90699100 | H  | -3.84893300 | -1.92983900 | -1.41903300 |
| H | 3.34682500  | 4.45766100  | -3.95729600 | H  | -5.14315700 | -2.63066300 | -2.40261800 |
| H | 4.85876700  | 4.91093000  | -3.17941200 | C  | -0.56293800 | -4.59710900 | 2.56437500  |
| C | -0.63530300 | 6.37880600  | -3.95501700 | H  | -0.07601400 | -5.06719600 | 3.43028700  |
| H | -1.30787100 | 6.73605600  | -4.74753800 | H  | -1.48244000 | -5.16545000 | 2.36347400  |
| H | 0.35584200  | 6.23058000  | -4.40333500 | H  | -0.83426200 | -3.58360500 | 2.88498100  |
| H | -0.54961900 | 7.17044300  | -3.19786100 | C  | 1.59472800  | -3.72371200 | 1.69910300  |
| C | -1.23973700 | 3.99670400  | -4.40924300 | H  | 1.29200000  | -2.66559100 | 1.72592400  |
| H | -1.75570300 | 3.09852200  | -4.03812600 | H  | 2.39900200  | -3.82451600 | 0.95672800  |
| H | -0.23696500 | 3.69500400  | -4.74132800 | H  | 2.01926600  | -3.97992800 | 2.68132300  |
| H | -1.79414200 | 4.35138000  | -5.28953400 | C  | 0.89330700  | -6.09389100 | 1.30953300  |
| C | -2.62185300 | 5.37458100  | -2.87505500 | H  | 1.32491000  | -6.38550800 | 2.27697000  |
| H | -2.66264400 | 6.21946500  | -2.17324900 | H  | 1.66260800  | -6.25443500 | 0.54595900  |
| H | -3.08212800 | 4.50431200  | -2.38495600 | H  | 0.05576300  | -6.77160200 | 1.09300400  |
| H | -3.24293300 | 5.63387700  | -3.74281800 | Pd | -0.05394900 | -0.00690900 | -0.69108000 |
| C | -1.67989600 | 3.65803500  | 1.88744000  | C  | 0.94007100  | 0.70611200  | -2.53802900 |
| H | -1.45334800 | 2.58106200  | 1.88608700  | C  | -1.04903000 | -0.69446000 | -2.54558700 |
| H | -2.47913400 | 3.83439700  | 1.15417800  | C  | -0.42821200 | 0.53820800  | -2.79639300 |
| H | -2.08633300 | 3.91032000  | 2.87861900  | H  | -0.50955100 | -1.63925400 | -2.66066300 |
| C | 0.54170100  | 4.31074000  | 2.76748700  | H  | -2.13572500 | -0.75488700 | -2.56539300 |
| H | 0.08575200  | 4.73304100  | 3.67414300  | H  | -1.05078900 | 1.42926700  | -2.90495800 |
| H | 1.48873600  | 4.84591300  | 2.60768900  | H  | 1.36190000  | 1.71031000  | -2.54877700 |
| H | 0.75891900  | 3.26068400  | 3.00062800  | H  | 1.64557400  | -0.12205400 | -2.64969100 |
| C | -0.81185500 | 5.99014100  | 1.63401300  |    |             |             |             |

7B<sup>+</sup>

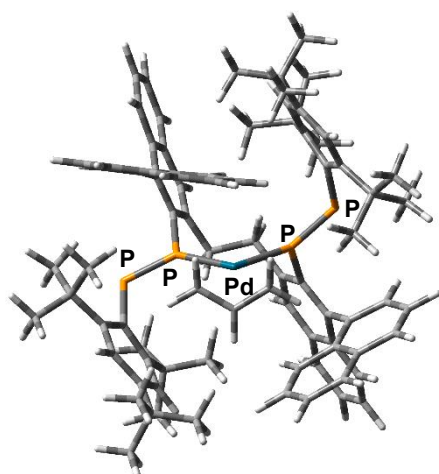

|    |             |             |             |   |             |             |             |
|----|-------------|-------------|-------------|---|-------------|-------------|-------------|
| C  | 2.93292000  | -3.15675000 | 2.72946100  | C | -3.00828900 | 4.28999500  | 4.75936200  |
| C  | 1.88109100  | -2.90701000 | 1.79362800  | C | -3.07631200 | 5.38289300  | 2.18595500  |
| C  | 2.86454600  | -2.56071700 | 4.02352900  | C | -3.90116400 | 5.86911300  | 3.16974800  |
| C  | 1.79838400  | -1.68609500 | 4.32819900  | C | -3.87008600 | 5.31706400  | 4.46986800  |
| C  | 0.85323600  | -2.03280200 | 2.13531100  | H | 3.82201300  | -2.35693400 | 5.94855100  |
| P  | -1.81346400 | -3.21122400 | 1.61416600  | H | 4.14640600  | -4.38993800 | 1.42092700  |
| C  | 0.82493400  | -1.38190600 | 3.40809700  | H | -2.96799100 | 3.86016500  | 5.76014200  |
| C  | -0.40623800 | 2.19716900  | 3.09162400  | H | -4.52965200 | 5.71262300  | 5.23992400  |
| C  | -1.24004600 | 2.72261600  | 4.04895200  | H | -4.58321100 | 6.68787100  | 2.94860900  |
| C  | -0.47001500 | 2.71598100  | 1.75605100  | H | -3.10422400 | 5.81833400  | 1.18858600  |
| P  | 2.21800900  | 3.10748100  | 0.54651800  | C | -1.36810900 | 4.37585100  | 0.08367700  |
| C  | 0.53641900  | 1.08939200  | 3.47640700  | C | -0.49975600 | 5.39325500  | -0.24936500 |
| H  | 1.08703500  | 1.36683700  | 4.38827800  | C | -2.36105300 | 3.97001400  | -0.85644600 |
| H  | 1.30392900  | 0.96018400  | 2.70167500  | C | -0.55024500 | 6.01633200  | -1.51467800 |
| P  | 0.56184700  | 1.90257500  | 0.45659400  | H | 0.23547800  | 5.72559400  | 0.48457800  |
| P  | -0.54041500 | -1.74829800 | 0.96638600  | C | -2.40707600 | 4.59539900  | -2.13909500 |
| Pd | -0.51704900 | 0.03718300  | -0.62504700 | C | -1.47927400 | 5.62081200  | -2.44374700 |
| C  | -0.15060600 | -0.27444400 | 3.70230200  | H | 0.15457500  | 6.81351500  | -1.74530100 |
| H  | -1.03607200 | -0.33984800 | 3.05444600  | C | -4.31222900 | 3.21385000  | -2.74330000 |
| H  | -0.52164300 | -0.34046700 | 4.73508900  | C | -3.39506100 | 4.18213400  | -3.06950400 |
| H  | 1.77586000  | -1.21125500 | 5.31167400  | C | -4.28192700 | 2.61636300  | -1.46277000 |
| C  | -2.14783500 | 3.76520300  | 3.76385800  | C | -3.32499400 | 2.97926800  | -0.54826000 |
| C  | -2.18108000 | 4.31353900  | 2.44937900  | H | -5.02205500 | 1.85938300  | -1.20101200 |
| C  | -1.32216000 | 3.76930400  | 1.44477100  | H | -5.07085600 | 2.90994000  | -3.46284000 |
| H  | -1.19219800 | 2.33784300  | 5.07029800  | H | -3.41827100 | 4.65974400  | -4.04905400 |
| C  | 4.97324100  | -3.59331900 | 4.62654100  | H | -1.52562200 | 6.09519800  | -3.42400400 |
| H  | 5.76535900  | -3.77187400 | 5.35124400  | H | -3.30159400 | 2.52093700  | 0.43936400  |
| C  | 5.06154200  | -4.15925700 | 3.33570900  | C | 2.23140600  | -1.51514900 | -0.82881800 |
| H  | 5.92716500  | -4.76314700 | 3.07006300  | C | 1.95323600  | -2.94837900 | -3.21143700 |
| C  | 4.06537100  | -3.95176500 | 2.41365400  | C | 2.25890800  | -0.86419100 | -2.04023400 |
| C  | 3.89609500  | -2.81222300 | 4.96102300  | C | 2.09982600  | -1.58247600 | -3.24562600 |
| C  | 1.88863000  | -3.61752200 | 0.48505400  | H | 1.86341600  | -3.52170700 | -4.13422400 |
| C  | 1.74012700  | -4.99066800 | 0.46783800  | H | 2.11640400  | -1.05096100 | -4.19739000 |
| C  | 2.02105700  | -2.91627700 | -0.75404000 | H | 2.42570300  | 0.21264500  | -2.06765200 |
| C  | 1.70199000  | -5.71613900 | -0.74054400 | H | 2.39082600  | -0.94755700 | 0.08740200  |
| H  | 1.63768900  | -5.52081600 | 1.41543100  | C | -3.28313300 | -3.02194700 | 0.50484300  |
| C  | 1.92028300  | -3.64811800 | -1.97740000 | C | -3.41829600 | -3.86842200 | -0.62830000 |
| C  | 1.78014300  | -5.05610700 | -1.94005300 | C | -4.20475400 | -1.95078600 | 0.69859800  |
| H  | 1.58279600  | -6.79771200 | -0.71196000 | C | -4.30325800 | -3.46825100 | -1.63708400 |
| H  | 1.71880300  | -5.60076000 | -2.88239200 | C | -5.03096400 | -1.60424300 | -0.37084500 |

|   |             |             |             |   |             |             |             |
|---|-------------|-------------|-------------|---|-------------|-------------|-------------|
| C | -5.06575400 | -2.31052300 | -1.57295800 | C | -3.87362100 | -1.82645400 | 3.26818500  |
| H | -4.36821700 | -4.08149000 | -2.53074100 | H | -4.26686200 | -1.30081300 | 4.14894000  |
| H | -5.69470600 | -0.74947400 | -0.25867300 | H | -4.20028900 | -2.87367800 | 3.33738400  |
| C | 3.52697400  | 2.33292500  | -0.51019400 | H | -2.78226400 | -1.79379500 | 3.36880200  |
| C | 3.62589700  | 2.60419900  | -1.90736600 | C | 1.48650200  | 3.38684700  | -3.00914000 |
| C | 4.43667300  | 1.41769200  | 0.09197700  | H | 1.49431700  | 2.48926500  | -3.64624900 |
| C | 4.43986200  | 1.77137400  | -2.67870500 | H | 0.86453600  | 3.18401500  | -2.12834400 |
| C | 5.18990900  | 0.60633900  | -0.76024500 | H | 1.00542600  | 4.20075700  | -3.57204900 |
| C | 5.17257700  | 0.71453000  | -2.14405900 | C | 3.64346400  | 4.14211000  | -3.93505300 |
| H | 4.48936000  | 1.94316700  | -3.74859100 | H | 3.19569900  | 5.05729600  | -4.34400700 |
| H | 5.83003100  | -0.15045600 | -0.31350400 | H | 4.71227800  | 4.33487500  | -3.77002300 |
| C | -4.40689300 | -1.14584100 | 2.00309800  | H | 3.54465000  | 3.37182300  | -4.71016400 |
| C | -2.68174400 | -5.19642000 | -0.91449000 | C | 2.92426700  | 5.05414500  | -1.78798600 |
| C | -5.98795100 | -1.87917600 | -2.70981300 | H | 3.94371300  | 5.31407100  | -1.47064600 |
| C | 2.91908800  | 3.77328500  | -2.63045700 | H | 2.52687000  | 5.88834600  | -2.38282700 |
| C | 6.01463900  | -0.22445500 | -3.00388100 | H | 2.29200000  | 5.00024500  | -0.89074400 |
| C | 4.76273300  | 1.24042400  | 1.59703800  | C | 4.27599100  | -0.12514700 | 2.08939400  |
| C | -1.69415900 | -4.98733700 | -2.06868600 | H | 3.17880300  | -0.20030300 | 2.04235900  |
| H | -2.19430600 | -4.63248400 | -2.98014400 | H | 4.69393200  | -0.95439000 | 1.50106700  |
| H | -0.91822500 | -4.25561300 | -1.79684400 | H | 4.57019700  | -0.28027700 | 3.13847700  |
| H | -1.18533800 | -5.93242800 | -2.30808000 | C | 4.21657800  | 2.31140700  | 2.54501800  |
| C | -1.91807300 | -5.80919300 | 0.26021100  | H | 4.67984400  | 2.17346000  | 3.53219100  |
| H | -2.53909800 | -5.89775600 | 1.16283500  | H | 4.46321000  | 3.32940100  | 2.21199200  |
| H | -1.60015100 | -6.82494800 | -0.01631300 | H | 3.13381100  | 2.24656600  | 2.71239500  |
| H | -0.99476200 | -5.26854700 | 0.50755400  | C | 6.29423700  | 1.31932600  | 1.76800800  |
| C | -3.72082200 | -6.26150200 | -1.31417200 | H | 6.54657700  | 1.23739100  | 2.83389800  |
| H | -4.45289300 | -6.41330100 | -0.50886200 | H | 6.83580700  | 0.52098300  | 1.24939400  |
| H | -4.27197700 | -6.01668200 | -2.22855700 | H | 6.67835300  | 2.28172500  | 1.40234600  |
| H | -3.21221200 | -7.21832500 | -1.49327900 | C | 5.88633800  | -1.67277800 | -2.51558400 |
| C | -5.87162900 | -0.37248300 | -2.95832700 | H | 6.23682900  | -1.80413900 | -1.48370400 |
| H | -6.18126400 | 0.22188300  | -2.08847200 | H | 4.84396000  | -2.02087600 | -2.56931000 |
| H | -4.83972200 | -0.09415500 | -3.22179100 | H | 6.49673100  | -2.32995200 | -3.15066400 |
| H | -6.52017300 | -0.08046700 | -3.79585000 | C | 7.48114000  | 0.21546700  | -2.90479300 |
| C | -5.64996800 | -2.58875300 | -4.02093400 | H | 8.11856200  | -0.43761800 | -3.51836900 |
| H | -5.83458400 | -3.66995300 | -3.97032900 | H | 7.60493200  | 1.24708900  | -3.26363300 |
| H | -6.28054200 | -2.19086300 | -4.82710600 | H | 7.84663500  | 0.17134900  | -1.86935400 |
| H | -4.59853800 | -2.42949500 | -4.30360000 | C | 5.59384200  | -0.19197900 | -4.47324000 |
| C | -7.43295000 | -2.21826600 | -2.32288100 | H | 4.52913100  | -0.44072800 | -4.59191500 |
| H | -8.12208500 | -1.92526500 | -3.12787400 | H | 5.77384600  | 0.78530100  | -4.94084900 |
| H | -7.54855200 | -3.29744900 | -2.15058100 | H | 6.17686300  | -0.93200900 | -5.03781300 |
| H | -7.73948300 | -1.69436900 | -1.40712600 | C | -1.52938300 | -1.21381700 | -2.15748000 |
| C | -5.91469800 | -0.96647100 | 2.26566000  | H | -0.62606300 | -1.58181100 | -2.65419200 |
| H | -6.05423000 | -0.43112900 | 3.21414700  | H | -2.24712700 | -1.96522100 | -1.83239200 |
| H | -6.42864300 | -0.38154100 | 1.49522300  | C | -0.95883000 | 1.10450300  | -2.53000600 |
| H | -6.41786200 | -1.93972300 | 2.34827300  | H | -1.22411100 | 2.16098500  | -2.48592000 |
| C | -3.77328700 | 0.24205000  | 1.85310700  | H | -0.05121500 | 0.85329600  | -3.08186100 |
| H | -3.83982800 | 0.81203200  | 2.79307900  | C | -1.93550400 | 0.12083200  | -2.30979200 |
| H | -2.71359700 | 0.17568200  | 1.56158300  | H | -2.93731800 | 0.41648500  | -1.98658900 |
| H | -4.29534100 | 0.81308800  | 1.07265400  |   |             |             |             |

7c<sup>+</sup>

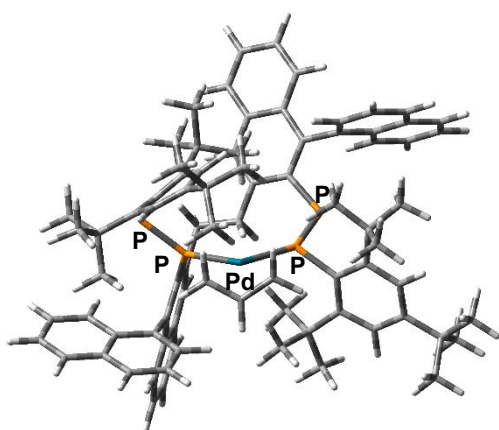

|   |            |             |             |   |             |             |             |
|---|------------|-------------|-------------|---|-------------|-------------|-------------|
| C | 4.50597400 | 5.03680200  | -3.74404000 | H | 4.37167000  | 3.50852800  | 2.34345800  |
| C | 7.41531600 | 0.41603300  | -1.97056200 | C | 1.83142900  | -3.49813000 | 4.73704700  |
| C | 3.53751900 | 2.96380900  | -2.93143600 | H | 2.83545200  | 3.10259600  | 0.42556600  |
| C | 5.62279200 | 1.57942400  | -0.81751600 | C | -1.48075700 | -1.22026200 | -2.89936100 |
| C | 4.27453100 | 2.04882500  | -0.73748200 | C | -1.35698200 | -2.29617900 | -3.73964400 |
| C | 3.39528000 | 1.94630100  | -1.93592400 | C | -2.58791800 | -1.17348300 | -1.98925600 |
| C | 4.73151500 | 2.96557700  | 1.47064800  | C | -2.29037900 | -3.36031700 | -3.74687600 |
| C | 6.03591100 | 2.54582100  | 1.40388100  | H | -0.51816100 | -2.35510100 | -4.43396000 |
| C | 6.51263000 | 1.85191100  | 0.26450500  | C | -3.53640100 | -2.18972700 | -1.98671500 |
| C | 7.85561600 | 1.40877600  | 0.18290700  | C | -3.40597000 | -3.30914600 | -2.86577300 |
| C | 8.29949800 | 0.70371200  | -0.90811000 | C | -2.13662800 | -4.46952200 | -4.61121500 |
| H | 9.33192700 | 0.36299100  | -0.95714700 | C | -4.69480100 | -2.17321500 | -1.04901200 |
| H | 8.52713600 | 1.63202400  | 1.01217200  | P | -1.47720600 | 0.81816900  | 0.31540200  |
| H | 6.72793100 | 2.74321200  | 2.22241800  | C | -4.34038600 | -4.37595300 | -2.89115800 |
| C | 3.74490100 | 4.93873900  | -4.92949300 | C | -3.05801500 | -5.48782800 | -4.61373000 |
| C | 2.89921100 | 3.87502800  | -5.11771900 | H | -1.27264200 | -4.49629400 | -5.27533200 |
| C | 2.77726300 | 2.86746200  | -4.13072200 | C | -5.94745800 | -1.61592700 | -1.44922800 |
| H | 3.83507600 | 5.70859400  | -5.69349800 | C | -4.58357200 | -2.79336700 | 0.17827300  |
| H | 2.30967100 | 3.78569300  | -6.02993700 | C | -2.36153400 | 2.22602000  | 1.12587800  |
| C | 1.93234400 | 1.75151500  | -4.31688900 | C | -4.17135400 | -5.43650100 | -3.74780100 |
| H | 1.38101700 | 1.66943100  | -5.25565900 | H | -5.19837600 | -4.34973200 | -2.22185200 |
| C | 6.11296400 | 0.85342000  | -1.93289300 | H | -2.93312100 | -6.33667800 | -5.28323900 |
| H | 5.44503100 | 0.64138000  | -2.76707900 | C | -7.05400200 | -1.69251500 | -0.55098300 |
| C | 4.40838600 | 4.07356700  | -2.77035500 | C | -6.13205000 | -0.99138800 | -2.70806200 |
| H | 4.99968200 | 4.15873000  | -1.86021800 | C | -5.68287400 | -2.87597400 | 1.05887500  |
| H | 7.77187100 | -0.14684900 | -2.83121800 | H | -3.63051600 | -3.24433400 | 0.45996600  |
| H | 5.17652000 | 5.88216200  | -3.60282200 | C | -2.14896600 | 3.56309600  | 0.64360000  |
| C | 2.51206500 | 0.89056700  | -2.13407300 | C | -3.34942200 | 1.96690700  | 2.11181800  |
| C | 3.85718800 | 2.72635000  | 0.38808900  | H | -4.89827200 | -6.24637500 | -3.75678600 |
| P | 3.28508700 | -1.95317600 | -1.01945700 | C | -6.89170200 | -2.33529300 | 0.70144000  |
| C | 2.93237900 | -2.84285800 | 0.57764600  | C | -8.29609100 | -1.13392300 | -0.94154300 |
| C | 3.94231700 | -2.86444900 | 1.59124000  | C | -7.35046000 | -0.46242000 | -3.05784500 |
| C | 1.64312500 | -3.34824300 | 0.88072600  | H | -5.29192300 | -0.93797700 | -3.40041000 |
| C | 3.53597100 | -3.10543600 | 2.90208600  | H | -5.56180300 | -3.36888800 | 2.02264400  |
| C | 1.30444400 | -3.52471100 | 2.23057000  | C | -3.01956900 | 4.55005200  | 1.09175200  |
| C | 2.20889800 | -3.35052800 | 3.26636500  | C | -0.96395800 | 4.03639800  | -0.23951800 |
| H | 4.28443700 | -3.08468900 | 3.68961700  | C | -4.15863900 | 3.04283400  | 2.51705000  |
| H | 0.28954800 | -3.83625000 | 2.46460400  | C | -3.68701900 | 0.65362700  | 2.87655100  |
| C | 0.59518500 | -3.87484000 | -0.12106900 | H | -7.74743900 | -2.39096300 | 1.37440100  |
| C | 5.45165800 | -2.64929000 | 1.34181600  | C | -8.44312900 | -0.53103200 | -2.16591600 |
| C | 1.78681000 | 0.77241700  | -3.36569300 | H | -9.13470400 | -1.19507200 | -0.24780900 |

|    |             |             |             |   |             |             |             |
|----|-------------|-------------|-------------|---|-------------|-------------|-------------|
| H  | -7.47740500 | 0.01171600  | -4.02941800 | H | -5.54313600 | 4.66700500  | 4.37659700  |
| C  | -4.04445900 | 4.32204400  | 2.01050500  | H | -6.63452300 | 5.89707600  | 3.71662300  |
| H  | -2.90807700 | 5.55887400  | 0.71107700  | C | -0.70796500 | -3.07960100 | -0.01578100 |
| H  | -4.92832700 | 2.85411700  | 3.25839700  | H | -1.13650500 | -3.11307700 | 0.99654500  |
| H  | -9.40283500 | -0.10705300 | -2.45533200 | H | -0.54706400 | -2.02311000 | -0.27535000 |
| C  | -4.96146000 | 5.46894200  | 2.42430600  | H | -1.45416200 | -3.48620900 | -0.71416100 |
| C  | -0.49000100 | -0.09504500 | -2.92368100 | C | 1.03476800  | -3.90754700 | -1.58465600 |
| H  | -0.95460200 | 0.80599100  | -3.36199300 | H | 2.00012900  | -4.41867100 | -1.71327300 |
| H  | -0.26039400 | 0.18664800  | -1.88803100 | H | 0.28886700  | -4.46360000 | -2.17095600 |
| P  | -3.02162300 | 0.27317300  | -0.93361500 | H | 1.09521900  | -2.91422800 | -2.04067700 |
| P  | 2.20948600  | -0.24172500 | -0.70951100 | C | 0.31439300  | -5.34692900 | 0.24476900  |
| Pd | 0.80084800  | 0.40527400  | 1.09739300  | H | -0.10350900 | -5.46879700 | 1.25025500  |
| C  | 0.83234700  | -0.35537600 | -3.63392100 | H | -0.41058200 | -5.76829100 | -0.46528800 |
| H  | 1.25786700  | -1.31335800 | -3.30123800 | H | 1.23456800  | -5.94456200 | 0.18567500  |
| H  | 0.67735500  | -0.44581900 | -4.71771700 | C | 0.33062800  | -3.70567900 | 4.93400600  |
| C  | -0.74892800 | 3.24633700  | -1.53833400 | H | -0.25802000 | -2.87902500 | 4.50808300  |
| H  | -1.68343200 | 3.12141200  | -2.10370700 | H | -0.01948900 | -4.64470700 | 4.48359000  |
| H  | -0.02991700 | 3.78060600  | -2.17677500 | H | 0.10627700  | -3.75342400 | 6.00799200  |
| C  | 0.31303200  | 3.96384600  | 0.60478900  | C | 2.23668400  | -2.23253100 | 5.50270600  |
| H  | 0.21515200  | 4.55190300  | 1.52889900  | H | 3.31025900  | -2.01840000 | 5.41972700  |
| H  | 0.55524800  | 2.92731600  | 0.88275200  | H | 1.68638400  | -1.35344500 | 5.13427700  |
| H  | 1.16053700  | 4.36591200  | 0.02848200  | H | 2.00160200  | -2.34806300 | 6.57017400  |
| C  | -1.11034300 | 5.50316900  | -0.67362200 | C | 2.56552300  | -4.70780500 | 5.32897000  |
| H  | -1.11882500 | 6.19907900  | 0.17473400  | H | 2.28742200  | -4.83938200 | 6.38422500  |
| H  | -0.24593500 | 5.77148600  | -1.29405400 | H | 2.30025800  | -5.62773700 | 4.78968000  |
| H  | -2.01472400 | 5.66997000  | -1.27460200 | H | 3.65609500  | -4.59091700 | 5.28353000  |
| C  | -2.90109400 | -0.62746300 | 2.56874000  | C | 5.78735300  | -1.15731600 | 1.32905300  |
| H  | -3.18253700 | -1.08118500 | 1.61416600  | H | 5.26815000  | -0.61330200 | 0.52834300  |
| H  | -1.81123900 | -0.49915600 | 2.57821900  | H | 5.52272800  | -0.68747800 | 2.28871000  |
| H  | -3.13886200 | -1.36382000 | 3.35090600  | H | 6.86593400  | -1.01317100 | 1.17117300  |
| C  | -5.16190800 | 0.29872600  | 2.62417300  | C | 5.92187800  | -3.30509800 | 0.03687300  |
| H  | -5.34438300 | 0.16294300  | 1.54788900  | H | 7.01660300  | -3.24286000 | -0.02997600 |
| H  | -5.40782300 | -0.64853300 | 3.12480100  | H | 5.63722700  | -4.36578500 | 0.00049200  |
| H  | -5.85930700 | 1.05883800  | 2.99537400  | H | 5.53392700  | -2.81652700 | -0.86553300 |
| C  | -3.46590200 | 0.91697500  | 4.37945800  | C | 6.29663700  | -3.29551100 | 2.45098700  |
| H  | -2.40160200 | 1.09288200  | 4.59478400  | H | 6.19862900  | -2.78642800 | 3.41783500  |
| H  | -4.02599200 | 1.77886500  | 4.75786500  | H | 6.04777600  | -4.35660900 | 2.58985800  |
| H  | -3.78202100 | 0.03867700  | 4.95888800  | H | 7.35612300  | -3.23233000 | 2.17095200  |
| C  | -5.69730700 | 5.99844500  | 1.18757800  | H | -0.31997400 | 2.25153900  | -1.37306500 |
| H  | -6.36807800 | 6.82122400  | 1.47297500  | C | 0.29036200  | 0.91033700  | 3.20171900  |
| H  | -5.00525400 | 6.38244900  | 0.42669500  | H | 0.03554400  | -0.09600300 | 3.54496200  |
| H  | -6.30522700 | 5.20877800  | 0.72462100  | C | 2.49838200  | 0.24599100  | 2.50122100  |
| C  | -4.12498300 | 6.59500200  | 3.04474000  | H | 2.34595900  | -0.79942900 | 2.78608100  |
| H  | -3.58491400 | 6.23818100  | 3.93292900  | H | 3.49465100  | 0.51103700  | 2.14802700  |
| H  | -3.38736300 | 7.00243300  | 2.34102000  | C | 1.63166200  | 1.24578100  | 2.97379200  |
| H  | -4.77834100 | 7.42280400  | 3.35500800  | H | 1.92367200  | 2.29482200  | 2.89755900  |
| C  | -6.00620300 | 5.03647900  | 3.45077400  | H | -0.44938600 | 1.69019800  | 3.38546000  |
| H  | -6.66868100 | 4.25210400  | 3.05844200  |   |             |             |             |

7d<sup>+</sup>

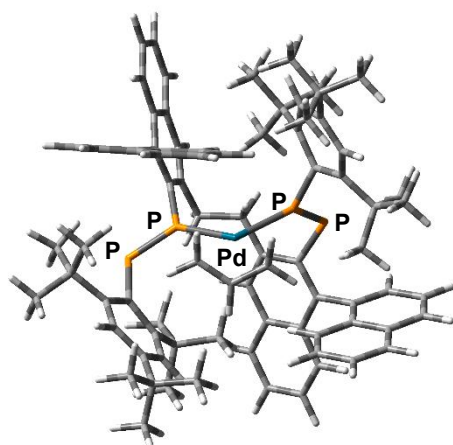

|    |             |             |             |   |             |             |             |
|----|-------------|-------------|-------------|---|-------------|-------------|-------------|
| C  | -3.94392400 | 1.83672700  | 2.98714800  | C | 5.70757700  | -2.35487700 | 2.30153200  |
| C  | -2.90776500 | 2.07805600  | 2.02943700  | C | 6.76351100  | -1.68771200 | 2.87311400  |
| C  | -3.59695800 | 1.31499700  | 4.26610600  | C | 6.53522000  | -0.63392100 | 3.78477900  |
| C  | -2.23950600 | 1.05900800  | 4.55796000  | H | -4.33186000 | 0.64836500  | 6.18456600  |
| C  | -1.59060000 | 1.73567500  | 2.32993300  | H | -5.59944400 | 2.45477300  | 1.72624200  |
| P  | 0.56539300  | 3.63740100  | 1.38448400  | H | 5.06459500  | 0.53849900  | 4.81752300  |
| C  | -1.24513600 | 1.23138500  | 3.62707800  | H | 7.38048500  | -0.11526700 | 4.23322500  |
| C  | 1.73295800  | -1.12273000 | 3.20961300  | H | 7.78398300  | -1.97299900 | 2.62465100  |
| C  | 2.81626700  | -0.52621100 | 3.80371500  | H | 5.89132700  | -3.17028900 | 1.60368100  |
| C  | 1.95791700  | -2.21118000 | 2.30202100  | C | 3.46410800  | -3.77003100 | 1.06489200  |
| P  | -0.40044600 | -2.15871000 | 0.30433600  | C | 3.37256400  | -5.07165500 | 1.51601600  |
| C  | 0.33218100  | -0.66063500 | 3.48400100  | C | 3.79081100  | -3.52154100 | -0.30296400 |
| H  | -0.16802600 | -1.34270400 | 4.19425200  | C | 3.58298900  | -6.16382900 | 0.64765900  |
| H  | -0.23777200 | -0.76328200 | 2.55667500  | H | 3.13401700  | -5.25450000 | 2.56409000  |
| P  | 0.58847300  | -3.29133300 | 1.69181000  | C | 4.03522500  | -4.62749400 | -1.16949700 |
| P  | -0.34146000 | 1.84252600  | 0.97287600  | C | 3.91519300  | -5.94582000 | -0.66566800 |
| Pd | 0.01613800  | 0.05716600  | -0.62484400 | H | 3.49230000  | -7.17763100 | 1.03231400  |
| C  | 0.14912600  | 0.77980600  | 3.96677700  | C | 4.45050300  | -3.10077800 | -3.01120100 |
| H  | 0.89835000  | 1.42662300  | 3.49388500  | C | 4.36969700  | -4.38174100 | -2.52449700 |
| H  | 0.31216400  | 0.85824900  | 5.05022200  | C | 4.20418800  | -2.00430800 | -2.15472600 |
| H  | -1.98234100 | 0.67770100  | 5.54857400  | C | 3.88262900  | -2.21051300 | -0.83440100 |
| C  | 4.14346000  | -0.92922500 | 3.52532100  | H | 4.28314300  | -0.98871100 | -2.54428900 |
| C  | 4.37084700  | -1.99186400 | 2.60486900  | H | 4.70728400  | -2.92508400 | -4.05409000 |
| C  | 3.24561200  | -2.63809900 | 2.01045400  | H | 4.55532700  | -5.23570900 | -3.17623600 |
| H  | 2.67022900  | 0.29514600  | 4.50742800  | H | 4.09262100  | -6.78207400 | -1.34200500 |
| C  | -5.93460000 | 1.27537100  | 4.90319200  | H | 3.69691800  | -1.36207500 | -0.17767800 |
| H  | -6.71228300 | 1.06273900  | 5.63429000  | C | -3.21205500 | 0.78672600  | -0.70986400 |
| C  | -6.28524900 | 1.78904900  | 3.63535900  | C | -3.92239500 | 2.37395800  | -2.89610900 |
| H  | -7.33245500 | 1.96339600  | 3.39565500  | C | -3.31712000 | 0.23506200  | -1.96628200 |
| C  | -5.31598400 | 2.06739800  | 2.70317700  | C | -3.65896100 | 1.03891800  | -3.07529100 |
| C  | -4.61710400 | 1.04561100  | 5.21053300  | H | -4.21348700 | 3.00050200  | -3.73925600 |
| C  | -3.28929600 | 2.80104600  | 0.77961900  | H | -3.73002600 | 0.59452600  | -4.06718500 |
| C  | -3.58313500 | 4.14546700  | 0.90382600  | H | -3.14282900 | -0.83283000 | -2.10300400 |
| C  | -3.43607700 | 2.17174800  | -0.49418100 | H | -2.96108000 | 0.15004400  | 0.13960700  |
| C  | -4.02022800 | 4.91659600  | -0.19117400 | C | 1.71065500  | 3.95973400  | -0.04175100 |
| H  | -3.48385900 | 4.61475400  | 1.88358000  | C | 1.28652300  | 4.83974700  | -1.07801500 |
| C  | -3.83589500 | 2.96921900  | -1.61249300 | C | 2.95280700  | 3.27347800  | -0.18255400 |
| C  | -4.14198900 | 4.33827700  | -1.42763500 | C | 1.98541100  | 4.80787900  | -2.29285600 |
| H  | -4.24417300 | 5.97225200  | -0.04805700 | C | 3.56210800  | 3.27250300  | -1.43634600 |
| H  | -4.45862300 | 4.92365900  | -2.29100300 | C | 3.08312000  | 3.99341200  | -2.52683300 |
| C  | 5.25144300  | -0.26971100 | 4.10969900  | H | 1.63314700  | 5.44164800  | -3.10064600 |

|   |             |             |             |   |             |             |             |
|---|-------------|-------------|-------------|---|-------------|-------------|-------------|
| H | 4.47330100  | 2.69149100  | -1.56463200 | H | -5.43115400 | -2.68697300 | -5.27783100 |
| C | -1.86943200 | -3.07268800 | -0.39799100 | H | -4.35203900 | -1.65708700 | -4.31047600 |
| C | -3.19199100 | -2.73572000 | 0.02434100  | H | -3.77071600 | -3.21188300 | -4.94595900 |
| C | -1.71026100 | -3.84140700 | -1.60541300 | C | -5.53968600 | -4.83029800 | -3.55212200 |
| C | -4.23232200 | -2.89410700 | -0.90264400 | H | -6.33388100 | -4.85450300 | -4.31176500 |
| C | -2.79358400 | -3.90455500 | -2.47725100 | H | -4.68981000 | -5.40966400 | -3.93710700 |
| C | -4.04683700 | -3.36519300 | -2.19049900 | H | -5.91391300 | -5.33579300 | -2.65102200 |
| H | -5.23263900 | -2.60704800 | -0.60116000 | C | -6.39823700 | -2.63004700 | -2.77599700 |
| H | -2.67155300 | -4.42017100 | -3.42423700 | H | -6.87803600 | -3.11313600 | -1.91362700 |
| C | 3.75379700  | 2.55631900  | 0.92344000  | H | -6.16599300 | -1.58935900 | -2.50472200 |
| C | 0.11651700  | 5.85081500  | -1.06081400 | H | -7.13620000 | -2.60806900 | -3.58901000 |
| C | 3.80568700  | 3.92357800  | -3.86880500 | C | 3.73470400  | 1.04680900  | 0.66828200  |
| C | -3.67262100 | -2.44287600 | 1.46933600  | H | 2.71184000  | 0.63642800  | 0.73179900  |
| C | -5.15093800 | -3.38046500 | -3.24030100 | H | 4.13603000  | 0.81244200  | -0.32888600 |
| C | -0.51061400 | -4.77156200 | -1.91236600 | H | 4.35706300  | 0.52291800  | 1.40857600  |
| C | 0.20481700  | 1.60077700  | -2.22610600 | C | 3.28967400  | 2.84133600  | 2.35127400  |
| H | -0.81847500 | 1.50689600  | -2.60186900 | H | 4.03913500  | 2.45650700  | 3.05751200  |
| H | 0.53943600  | 2.60330900  | -1.96555000 | H | 3.18609500  | 3.91944400  | 2.54177000  |
| C | 0.71538200  | -0.74349800 | -2.56962300 | H | 2.34924600  | 2.34254800  | 2.60766300  |
| H | 1.46007000  | -1.53775000 | -2.55449500 | C | 5.21392600  | 3.04994400  | 0.88192900  |
| H | -0.24961100 | -0.98021900 | -3.02593800 | H | 5.78216500  | 2.56390100  | 1.68721900  |
| C | 1.14632100  | 0.58779800  | -2.44556400 | H | 5.73077500  | 2.82038000  | -0.05644200 |
| H | 2.19898400  | 0.80162600  | -2.24307400 | H | 5.26327400  | 4.13633800  | 1.03869000  |
| C | -0.35101600 | -5.74145200 | -0.73073800 | C | -0.96560900 | 5.37014700  | -2.03445500 |
| H | 0.48438800  | -6.43035700 | -0.92549500 | H | -0.58029900 | 5.24989700  | -3.05555200 |
| H | -0.14567800 | -5.23358400 | 0.21721200  | H | -1.38044000 | 4.40442700  | -1.70876200 |
| H | -1.26455900 | -6.33830700 | -0.59783000 | H | -1.79494100 | 6.09110100  | -2.06859600 |
| C | -0.76290600 | -5.65972100 | -3.13935600 | C | -0.54566800 | 6.10929900  | 0.29236400  |
| H | -1.67106400 | -6.26870500 | -3.03846300 | H | 0.18002100  | 6.38520800  | 1.07028500  |
| H | -0.82628300 | -5.08412900 | -4.07283900 | H | -1.24444300 | 6.95222400  | 0.18673800  |
| H | 0.08406400  | -6.35045800 | -3.24447200 | H | -1.15574400 | 5.26675900  | 0.64329100  |
| C | 0.80650200  | -4.05661700 | -2.20174900 | C | 0.64555700  | 7.22539800  | -1.51355200 |
| H | 0.71882600  | -3.45202700 | -3.11489300 | H | -0.17417500 | 7.95595300  | -1.49055000 |
| H | 1.15742400  | -3.41883400 | -1.38298200 | H | 1.43477800  | 7.58112600  | -0.83686900 |
| H | 1.59243500  | -4.80463600 | -2.37595900 | H | 1.04793800  | 7.22838400  | -2.53217400 |
| C | -2.69694300 | -1.72308900 | 2.38902400  | C | 3.84966700  | 2.46942700  | -4.35247500 |
| H | -1.84158800 | -2.34819300 | 2.64947500  | H | 4.35752800  | 1.80600400  | -3.63855800 |
| H | -2.33111400 | -0.77489300 | 1.96929800  | H | 2.83410000  | 2.08154700  | -4.51875600 |
| H | -3.20589700 | -1.47554500 | 3.33086500  | H | 4.39364200  | 2.40684200  | -5.30539000 |
| C | -4.98663100 | -1.64187300 | 1.51804800  | C | 5.23608000  | 4.45046400  | -3.69827300 |
| H | -5.19412100 | -1.36223700 | 2.55992200  | H | 5.76430900  | 4.42225500  | -4.66176300 |
| H | -4.93050200 | -0.71454900 | 0.92965300  | H | 5.22945800  | 5.49033500  | -3.34347000 |
| H | -5.85611900 | -2.21342500 | 1.17205900  | H | 5.81615800  | 3.85251800  | -2.98285700 |
| C | -3.93434900 | -3.82889900 | 2.08669000  | C | 3.11428200  | 4.75770100  | -4.94517200 |
| H | -4.68964200 | -4.38648900 | 1.51679200  | H | 3.11207200  | 5.82846300  | -4.69849200 |
| H | -3.01173500 | -4.42781100 | 2.10958000  | H | 3.64829900  | 4.64142100  | -5.89769500 |
| H | -4.29741800 | -3.71687700 | 3.11893400  | H | 2.07489500  | 4.43764600  | -5.10560400 |
| C | -4.64017100 | -2.69892600 | -4.51500500 |   |             |             |             |

7E<sup>+</sup>

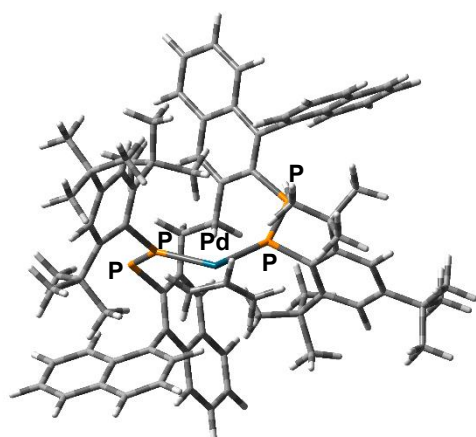

|   |            |             |             |   |             |             |             |
|---|------------|-------------|-------------|---|-------------|-------------|-------------|
| C | 2.63001200 | -6.35871400 | 2.33184700  | H | 4.07575700  | -3.56992600 | -2.62951300 |
| C | 7.20315800 | -2.01455300 | 2.39793800  | C | 3.65743500  | 5.76477100  | -3.19614300 |
| C | 2.56748700 | -3.92844900 | 2.31573200  | H | 2.46044700  | -3.17902800 | -0.77823800 |
| C | 5.34960100 | -2.54722000 | 0.92248000  | C | -1.36118000 | 1.03953300  | 2.91649700  |
| C | 3.95412500 | -2.69646500 | 0.66526400  | C | -1.11322000 | 2.02979600  | 3.82976500  |
| C | 2.96189100 | -2.66165700 | 1.77499400  | C | -2.44296700 | 1.20272600  | 1.99035600  |
| C | 4.44587300 | -3.27989700 | -1.64684000 | C | -1.88181200 | 3.21875500  | 3.87554800  |
| C | 5.79321600 | -3.16874500 | -1.41453500 | H | -0.29087800 | 1.93086200  | 4.53987900  |
| C | 6.27518600 | -2.78540100 | -0.13869800 | C | -3.22824400 | 2.34663200  | 2.01823300  |
| C | 7.66006400 | -2.61174400 | 0.10431200  | C | -2.95654200 | 3.38856700  | 2.95835800  |
| C | 8.11583100 | -2.22833100 | 1.34137700  | C | -1.58577400 | 4.25125400  | 4.79608300  |
| H | 9.18205100 | -2.09438700 | 1.51393500  | C | -4.31207800 | 2.56336700  | 1.01842600  |
| H | 8.35819600 | -2.78710900 | -0.71439200 | P | -1.53127500 | -0.70137700 | -0.44767200 |
| H | 6.51467800 | -3.35709200 | -2.20976400 | C | -3.70484400 | 4.59222200  | 3.00195600  |
| C | 1.63940900 | -6.39129800 | 3.33764000  | C | -2.32688400 | 5.40771200  | 4.81368200  |
| C | 1.13997700 | -5.21766300 | 3.84380600  | H | -0.75638100 | 4.11008800  | 5.48939500  |
| C | 1.59208000 | -3.96880300 | 3.35279700  | C | -5.66634900 | 2.21585100  | 1.30859900  |
| H | 1.28090500 | -7.34735700 | 3.71427800  | C | -4.00927000 | 3.20052700  | -0.16790400 |
| H | 0.38279100 | -5.22434700 | 4.62796800  | C | -2.54231500 | -1.97653400 | -1.33473500 |
| C | 1.06151300 | -2.75579200 | 3.83972500  | C | -3.39785300 | 5.57668100  | 3.91009800  |
| H | 0.29673800 | -2.79576800 | 4.61882500  | H | -4.52741200 | 4.73114200  | 2.30197300  |
| C | 5.85440300 | -2.17734700 | 2.19569300  | H | -2.09075400 | 6.19756700  | 5.52420300  |
| H | 5.15541300 | -2.02193900 | 3.01735400  | C | -6.67733100 | 2.52289200  | 0.34785900  |
| C | 3.08596100 | -5.16142200 | 1.83662800  | C | -6.04592600 | 1.58342400  | 2.51892600  |
| H | 3.84882800 | -5.15687900 | 1.06063300  | C | -5.01119400 | 3.50268200  | -1.11374700 |
| H | 7.57330300 | -1.72176600 | 3.37862600  | H | -2.97656300 | 3.49500200  | -0.36466600 |
| H | 3.03549500 | -7.29188900 | 1.94538800  | C | -2.51332800 | -3.33779600 | -0.88824400 |
| C | 2.40481000 | -1.48783600 | 2.27149100  | C | -3.44062300 | -1.58048300 | -2.36312000 |
| C | 3.52877000 | -3.04367100 | -0.60042500 | H | -3.98137900 | 6.49506700  | 3.93113300  |
| P | 2.30147500 | 0.76388600  | 0.08453400  | C | -6.31749300 | 3.17091000  | -0.85975900 |
| C | 2.99755300 | 2.40368800  | -0.48962200 | C | -8.02237400 | 2.18107900  | 0.63193200  |
| C | 2.12751300 | 3.54513300  | -0.46708500 | C | -7.36007300 | 1.26807900  | 2.76502200  |
| C | 4.22417600 | 2.48590600  | -1.22525000 | H | -5.27906400 | 1.35178500  | 3.25807500  |
| C | 2.39720800 | 4.59576300  | -1.34122500 | H | -4.73841200 | 4.00147300  | -2.04244600 |
| C | 4.39517200 | 3.58073800  | -2.08205400 | C | -3.45992800 | -4.21041400 | -1.41785900 |
| C | 3.48096100 | 4.61408300  | -2.21215700 | C | -1.56887900 | -3.95212400 | 0.17693500  |
| H | 1.72869400 | 5.44997800  | -1.34776900 | C | -4.33960400 | -2.54447600 | -2.84558500 |
| H | 5.29584200 | 3.62360300  | -2.67962800 | C | -3.61334300 | -0.20352900 | -3.06972200 |
| C | 5.44214400 | 1.53911100  | -1.09259000 | H | -7.10051700 | 3.39918400  | -1.58304400 |
| C | 0.95823800 | 3.75224200  | 0.51954900  | C | -8.35907700 | 1.56798200  | 1.81266500  |
| C | 1.44208600 | -1.53966700 | 3.33231400  | H | -8.78622800 | 2.41745700  | -0.10892400 |



|    |             |             |             |   |             |             |             |
|----|-------------|-------------|-------------|---|-------------|-------------|-------------|
| H  | -7.63565300 | 0.78389700  | 3.70010100  | H | 6.42653600  | 1.95231000  | -3.02551000 |
| C  | -4.39690500 | -3.84601500 | -2.38184100 | H | 6.99949500  | 2.98683500  | -1.68710100 |
| H  | -3.48112500 | -5.23365500 | -1.05620700 | H | 7.46660300  | 1.28452100  | -1.76300800 |
| H  | -5.04531000 | -2.24188900 | -3.61188800 | C | 5.15962800  | 0.10690400  | -1.53924400 |
| H  | -9.39646700 | 1.31250800  | 2.02050500  | H | 4.36040700  | -0.39443600 | -0.98379200 |
| C  | -5.41272100 | -4.86896200 | -2.88149100 | H | 4.91290900  | 0.07719600  | -2.61000300 |
| C  | -0.50794000 | -0.18657100 | 2.82359900  | H | 6.06422200  | -0.49750800 | -1.39562400 |
| H  | -1.13527600 | -1.08754600 | 2.94208200  | C | 5.95506900  | 1.58263200  | 0.35505600  |
| H  | -0.11658500 | -0.25684900 | 1.79543900  | H | 5.20699200  | 1.28664600  | 1.09599800  |
| P  | -3.02279400 | -0.11919000 | 0.84601000  | H | 6.81440500  | 0.90335200  | 0.46487900  |
| P  | 3.12196700  | 0.16427700  | 1.86027900  | H | 6.28761200  | 2.59911800  | 0.60860000  |
| C  | 0.68553700  | -0.31469300 | 3.76332800  | C | -2.66339500 | 0.94708800  | -2.71479300 |
| H  | 1.31401000  | 0.58961700  | 3.71612000  | H | -2.85717400 | 1.38305700  | -1.72951400 |
| H  | 0.35297100  | -0.41579300 | 4.80600600  | H | -1.60030900 | 0.67675800  | -2.77385000 |
| Pd | 0.72356700  | -0.28666800 | -1.41264100 | H | -2.82338500 | 1.75262400  | -3.44675700 |
| C  | 2.20339600  | -0.18208900 | -3.01056500 | C | -5.03324200 | 0.31212500  | -2.78022800 |
| C  | 0.18267400  | -1.46402200 | -3.24651800 | H | -5.19279600 | 0.42069800  | -1.69721700 |
| C  | 0.93776000  | -0.34825900 | -3.61211200 | H | -5.17583600 | 1.30136300  | -3.23874900 |
| H  | 0.68044600  | -2.38864900 | -2.94371700 | H | -5.81332200 | -0.35165700 | -3.17221400 |
| H  | -0.86107000 | -1.56214100 | -3.53927400 | C | -3.44564300 | -0.40594800 | -4.58921200 |
| H  | 0.46057800  | 0.48906100  | -4.12428000 | H | -2.41265600 | -0.68768900 | -4.84327700 |
| H  | 2.73493300  | 0.76294800  | -3.12391500 | H | -4.10841000 | -1.17119600 | -5.00656500 |
| H  | 2.81546300  | -1.05788800 | -2.77991600 | H | -3.66548000 | 0.53629700  | -5.10950200 |
| C  | 0.32328500  | 5.14740100  | 0.41594300  | C | -6.35844800 | -4.28806200 | -3.93049900 |
| H  | -0.45223600 | 5.22794500  | 1.19190800  | H | -6.94086300 | -3.44386700 | -3.53553700 |
| H  | 1.04675200  | 5.95525700  | 0.58885300  | H | -5.81920500 | -3.94729600 | -4.82562400 |
| H  | -0.17016400 | 5.31539700  | -0.55166100 | H | -7.07006200 | -5.06141700 | -4.24896400 |
| C  | 1.48117200  | 3.64571000  | 1.95921800  | C | -6.25668500 | -5.36054200 | -1.69908000 |
| H  | 0.66620900  | 3.84140600  | 2.67060300  | H | -6.99503500 | -6.09783200 | -2.04499700 |
| H  | 1.89479000  | 2.65990800  | 2.19661300  | H | -5.64575000 | -5.84114000 | -0.92391300 |
| H  | 2.27005400  | 4.39147400  | 2.13075800  | H | -6.80024300 | -4.52717500 | -1.23249800 |
| C  | -0.18875200 | 2.77737600  | 0.26434500  | C | -4.67409000 | -6.05601300 | -3.51220000 |
| H  | -0.48937700 | 2.79229400  | -0.79605900 | H | -4.06236000 | -5.72971600 | -4.36498200 |
| H  | 0.04748100  | 1.74223900  | 0.53028800  | H | -4.01340100 | -6.56200500 | -2.79630300 |
| H  | -1.05267100 | 3.06670500  | 0.87433200  | H | -5.39822000 | -6.79760600 | -3.87840100 |
| C  | 2.41298200  | 5.86372700  | -4.08699700 | C | -0.17798100 | -3.31693500 | 0.23004100  |
| H  | 1.50236500  | 6.06749800  | -3.50863400 | H | 0.25094100  | -3.18816600 | -0.77470500 |
| H  | 2.53418900  | 6.67968300  | -4.81343800 | H | -0.14330300 | -2.35103500 | 0.75045400  |
| H  | 2.25714200  | 4.93123500  | -4.64779100 | H | 0.49566700  | -3.97438000 | 0.79668600  |
| C  | 3.83767500  | 7.07619100  | -2.42121700 | C | -1.30546500 | -5.44410700 | -0.10655800 |
| H  | 3.96995600  | 7.91150800  | -3.12349700 | H | -2.18709400 | -6.07896300 | 0.03752400  |
| H  | 2.97012600  | 7.30707600  | -1.78932800 | H | -0.92845400 | -5.60238000 | -1.12666900 |
| H  | 4.72563100  | 7.03130300  | -1.77543000 | H | -0.54466900 | -5.80939700 | 0.59721500  |
| C  | 4.87404900  | 5.57513500  | -4.10054200 | C | -2.21656200 | -3.85735300 | 1.56522300  |
| H  | 5.81362600  | 5.56236600  | -3.53078600 | H | -1.54876600 | -4.30104100 | 2.32037400  |
| H  | 4.81033000  | 4.64476800  | -4.68218900 | H | -2.41519900 | -2.81681500 | 1.85581700  |
| H  | 4.93335900  | 6.40951200  | -4.81198700 | H | -3.17099100 | -4.40092500 | 1.59006200  |
| C  | 6.63999500  | 1.98298500  | -1.94838500 |   |             |             |             |

7F<sup>+</sup>

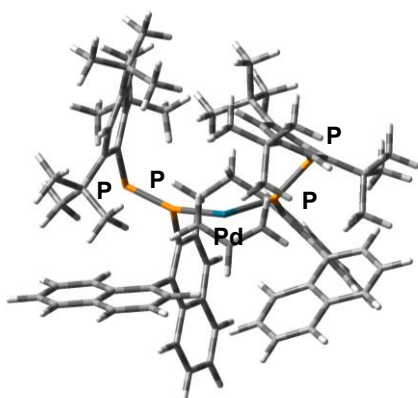

|   |             |             |             |    |             |             |             |
|---|-------------|-------------|-------------|----|-------------|-------------|-------------|
| C | -7.60497000 | -0.53127000 | 2.57953300  | P  | 2.28897200  | -2.70251900 | 1.30581800  |
| C | -3.67976600 | -1.37019600 | -2.52942700 | C  | -2.77173700 | -4.85925700 | -1.72563200 |
| C | -5.27243800 | -0.02009400 | 2.13466400  | C  | -4.88941400 | -5.25596200 | -0.62481400 |
| C | -4.40359700 | 0.53553800  | -1.20889200 | H  | -5.10694900 | -4.46957300 | 1.36038300  |
| C | -4.62404400 | 1.19018200  | 0.04115300  | C  | 0.74237700  | -4.67846300 | -1.86680900 |
| C | -4.23885000 | 0.53280000  | 1.31754100  | C  | -0.32099500 | -2.73318500 | -2.84962900 |
| C | -5.69287600 | 3.04165800  | -1.11932200 | C  | -4.03109100 | -5.40694200 | -1.73662600 |
| C | -5.44935300 | 2.45420600  | -2.33511100 | H  | -2.11906000 | -4.97157400 | -2.59035300 |
| C | -4.80026000 | 1.19825600  | -2.41133700 | H  | -5.88868400 | -5.68602700 | -0.65346000 |
| C | -4.56908000 | 0.56487800  | -3.65923500 | C  | 1.49378300  | -4.85132000 | -3.06791700 |
| C | -4.01979900 | -0.69109500 | -3.72086900 | C  | 0.92809500  | -5.60581700 | -0.81011400 |
| H | -3.86660000 | -1.17665500 | -4.68313400 | C  | 0.43156200  | -2.89935000 | -4.03253800 |
| H | -4.86161500 | 1.08948900  | -4.56896100 | H  | -1.04715600 | -1.92218900 | -2.77601800 |
| H | -5.75461800 | 2.94223200  | -3.26093400 | H  | -4.37237400 | -5.96109400 | -2.60888700 |
| C | -7.25675400 | -1.07746800 | 3.83482400  | C  | 1.31825500  | -3.94014600 | -4.13890100 |
| C | -5.94343400 | -1.11106800 | 4.22919900  | C  | 2.40117400  | -5.93451900 | -3.16458500 |
| C | -4.92363900 | -0.59839600 | 3.39005500  | C  | 1.81370900  | -6.64894200 | -0.93667800 |
| H | -8.03298900 | -1.47794400 | 4.48413900  | H  | 0.36222600  | -5.47906700 | 0.11244300  |
| H | -5.65928300 | -1.54270700 | 5.18875600  | H  | 0.29122600  | -2.20631900 | -4.86140200 |
| C | -3.56150800 | -0.69905600 | 3.74341700  | H  | 1.89824800  | -4.08729700 | -5.05018800 |
| H | -3.30498700 | -1.19857200 | 4.68074100  | C  | 2.55803200  | -6.81726700 | -2.12460200 |
| C | -3.84961400 | -0.76813200 | -1.30601600 | H  | 2.97075500  | -6.05314400 | -4.08668800 |
| H | -3.57921500 | -1.30577400 | -0.39543600 | H  | 1.94299200  | -7.35305000 | -0.11679900 |
| C | -6.63969200 | -0.01560700 | 1.75108400  | H  | 3.25616500  | -7.64761600 | -2.21199000 |
| H | -6.92024400 | 0.40160400  | 0.78620200  | C  | -0.98095600 | -2.18099300 | 3.05526800  |
| H | -3.29337100 | -2.38805900 | -2.57762100 | H  | -1.55626500 | -2.67077200 | 3.85252200  |
| H | -8.64743600 | -0.52172200 | 2.26722200  | H  | 0.06629200  | -2.45788300 | 3.23581600  |
| C | -2.90972400 | 0.43099400  | 1.71590800  | P  | 0.80555100  | -1.62790900 | 0.37801700  |
| C | -5.27214600 | 2.40806000  | 0.06708200  | P  | -1.59932200 | 1.28373100  | 0.73683900  |
| P | -1.64302700 | 3.15263600  | 1.56827400  | C  | -1.14270100 | -0.65813300 | 3.22624900  |
| C | -2.55802800 | -0.25775800 | 2.91523800  | H  | -0.87941800 | -0.39787200 | 4.26252200  |
| H | -6.19573600 | 4.00583000  | -1.06233600 | H  | -0.42565100 | -0.12597700 | 2.58404000  |
| H | -5.46544300 | 2.88195600  | 1.03073000  | Pd | -0.03826900 | 0.33059900  | -0.78946600 |
| C | -1.44802400 | -2.75314500 | 1.73964800  | C  | -0.60617600 | 1.83801400  | -2.27878600 |
| C | -2.68107200 | -3.36185700 | 1.69041300  | C  | 1.29543700  | 0.36943600  | -2.59085700 |
| C | -0.65061800 | -2.74726100 | 0.54765900  | C  | 0.00882900  | 0.77108300  | -2.96089900 |
| C | -3.16410600 | -4.01163100 | 0.53309800  | H  | 2.00977800  | 1.08462400  | -2.16906900 |
| H | -3.31140000 | -3.36675700 | 2.58161300  | H  | 1.70538100  | -0.55489100 | -2.99130400 |
| C | -1.04936200 | -3.45858900 | -0.57770800 | H  | -0.60408000 | 0.10877500  | -3.57552800 |
| C | -2.31283500 | -4.12260900 | -0.60188300 | H  | -1.67034100 | 2.02750500  | -2.42630400 |
| C | -4.46037500 | -4.58024400 | 0.48974400  | H  | -0.00939900 | 2.67800500  | -1.91391800 |
| C | -0.17492600 | -3.58661600 | -1.77702400 | C  | -0.37927200 | 4.05060100  | 0.54716400  |

|   |             |             |             |   |             |             |             |
|---|-------------|-------------|-------------|---|-------------|-------------|-------------|
| C | -0.80541100 | 4.88800900  | -0.52526400 | H | 3.86858200  | -1.16626400 | -2.59548100 |
| C | 1.00646400  | 3.78688900  | 0.70944200  | H | 3.73617200  | -2.88886200 | -3.03187700 |
| C | 0.12723000  | 5.19836900  | -1.51555300 | C | 4.35235800  | -3.95721700 | -0.59387000 |
| C | 1.86836900  | 4.10803400  | -0.34614400 | H | 3.30743500  | -4.14124500 | -0.30761600 |
| C | 1.45037500  | 4.76483400  | -1.49530100 | H | 4.55960300  | -4.66943200 | -1.40459300 |
| H | -0.20578100 | 5.78227500  | -2.37084600 | H | 4.99274900  | -4.21494500 | 0.26174300  |
| H | 2.91647900  | 3.83749300  | -0.25237900 | C | 6.03441800  | -2.57334800 | -1.69315900 |
| C | 3.81092300  | -1.63812700 | 1.26538000  | H | 6.29043600  | -1.66815700 | -2.25699800 |
| C | 4.20518300  | -0.91619000 | 2.42958600  | H | 6.80355200  | -2.72986700 | -0.92445900 |
| C | 4.57144700  | -1.49905800 | 0.06782200  | H | 6.08868400  | -3.40921300 | -2.40301600 |
| C | 5.13859800  | 0.11167500  | 2.26730500  | C | -2.86248500 | 4.86229200  | -1.96018800 |
| C | 5.43098000  | -0.40494600 | -0.02570800 | H | -2.24422300 | 4.94970800  | -2.86400600 |
| C | 5.68753200  | 0.45548200  | 1.03772300  | H | -3.05501500 | 3.79531000  | -1.77574600 |
| H | 5.42376800  | 0.69321600  | 3.13664900  | H | -3.83232500 | 5.33825300  | -2.16642500 |
| H | 5.95394600  | -0.23841900 | -0.96458500 | C | -2.03160200 | 7.02364600  | -0.99102600 |
| C | -2.20054300 | 5.51296900  | -0.74110400 | H | -3.02088400 | 7.48409200  | -1.11728400 |
| C | 1.70847600  | 3.26577700  | 1.98024300  | H | -1.53946300 | 7.50766700  | -0.13607800 |
| C | 2.36708700  | 5.05382200  | -2.67915800 | H | -1.45220000 | 7.25820700  | -1.89053200 |
| C | 4.62135000  | -2.53018800 | -1.08238200 | C | -3.16718100 | 5.40998000  | 0.43771500  |
| C | 3.73898400  | -1.24505500 | 3.86846200  | H | -2.73069100 | 5.79418400  | 1.37057100  |
| C | 6.58800200  | 1.67089100  | 0.84086700  | H | -4.05979200 | 6.01373600  | 0.21891200  |
| C | 2.29396300  | -0.81660000 | 4.13592700  | H | -3.53065900 | 4.38801500  | 0.60799400  |
| H | 2.18836900  | 0.27685100  | 4.10022900  | C | 1.78369700  | 4.39028300  | -3.93344000 |
| H | 1.59486300  | -1.23712100 | 3.40810500  | H | 0.76415400  | 4.73767400  | -4.14979300 |
| H | 1.98005400  | -1.15348400 | 5.13489000  | H | 2.40848300  | 4.61821400  | -4.80856800 |
| C | 4.59569100  | -0.53842700 | 4.92703900  | H | 1.74907000  | 3.29645500  | -3.81936600 |
| H | 4.27358000  | -0.87777700 | 5.92034400  | C | 3.77795500  | 4.51043900  | -2.46566200 |
| H | 5.66341100  | -0.77405500 | 4.82360000  | H | 3.77752100  | 3.42181100  | -2.30625900 |
| H | 4.47437500  | 0.55333600  | 4.90847600  | H | 4.38894500  | 4.71652000  | -3.35456300 |
| C | 3.90378000  | -2.74932900 | 4.13389600  | H | 4.27489400  | 4.98263300  | -1.60571300 |
| H | 4.93488700  | -3.06874600 | 3.92871700  | C | 2.46247300  | 6.56879900  | -2.89696200 |
| H | 3.68118500  | -2.96980400 | 5.18699700  | H | 1.48549100  | 7.01890500  | -3.11687000 |
| H | 3.23167200  | -3.37345700 | 3.53114400  | H | 2.87113800  | 7.06667400  | -2.00673700 |
| C | 6.00673500  | 2.54380700  | -0.27784100 | H | 3.12738100  | 6.78706100  | -3.74447300 |
| H | 6.62935100  | 3.43762700  | -0.42746100 | C | 2.34480500  | 1.90061400  | 1.71938800  |
| H | 5.94957700  | 2.01254300  | -1.23728700 | H | 1.57726400  | 1.12751500  | 1.55549600  |
| H | 4.99051200  | 2.88090000  | -0.01991500 | H | 3.00699700  | 1.90001700  | 0.84025100  |
| C | 7.99928600  | 1.21443000  | 0.45300700  | H | 2.95250200  | 1.59686300  | 2.58331600  |
| H | 8.65250600  | 2.08664800  | 0.30753900  | C | 0.83958700  | 3.15887000  | 3.23651100  |
| H | 8.43811400  | 0.58916200  | 1.24289000  | H | 1.49319300  | 2.98880100  | 4.10431700  |
| H | 8.00456600  | 0.63406000  | -0.47925300 | H | 0.27906400  | 4.08429200  | 3.43376800  |
| C | 6.68829800  | 2.52804500  | 2.10088900  | H | 0.13785800  | 2.31644900  | 3.21731900  |
| H | 7.16924400  | 1.99043500  | 2.92959400  | C | 2.81332200  | 4.27737500  | 2.34974500  |
| H | 7.29620100  | 3.41829400  | 1.89056500  | H | 3.32069200  | 3.94672800  | 3.26689900  |
| H | 5.69909700  | 2.87015000  | 2.43968600  | H | 3.58065600  | 4.38889300  | 1.57412500  |
| C | 3.64842400  | -2.17019200 | -2.20343500 | H | 2.38305100  | 5.27048000  | 2.54014800  |
| H | 2.60718200  | -2.19121000 | -1.85656600 |   |             |             |             |

7G<sup>+</sup>

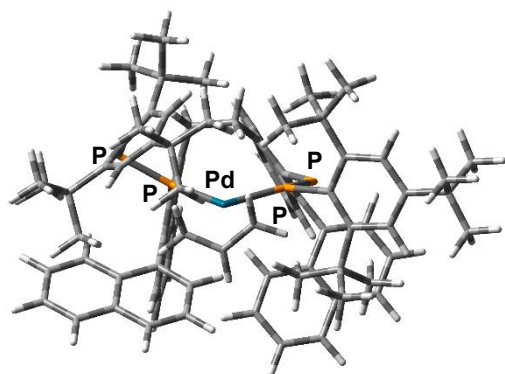

|   |             |             |             |    |             |             |             |
|---|-------------|-------------|-------------|----|-------------|-------------|-------------|
| C | -6.40208200 | -4.07763200 | 2.58452600  | C  | -1.19336900 | -5.10787700 | -1.50390200 |
| C | -3.34728400 | -2.56736400 | -2.59769100 | C  | -2.83507400 | -6.31773000 | -0.19976400 |
| C | -4.75626300 | -2.33711000 | 2.20077800  | H  | -2.99590800 | -5.78842400 | 1.87757800  |
| C | -4.68082900 | -1.25211100 | -1.05537000 | C  | 1.91978600  | -3.66748900 | -2.16432600 |
| C | -4.99869100 | -0.78821400 | 0.25746600  | C  | 0.19325100  | -1.99681700 | -2.51965800 |
| C | -4.22400900 | -1.25587200 | 1.43998400  | C  | -2.16805500 | -6.07186500 | -1.42146700 |
| C | -6.88404200 | 0.46280500  | -0.63490400 | H  | -0.69022800 | -4.91982900 | -2.45210700 |
| C | -6.59086600 | 0.03894900  | -1.90680300 | H  | -3.61805500 | -7.07218400 | -0.15531200 |
| C | -5.49474500 | -0.82397100 | -2.14784600 | C  | 2.46553600  | -3.35206700 | -3.44578900 |
| C | -5.19072200 | -1.27365300 | -3.45671100 | C  | 2.54134100  | -4.68074400 | -1.39095800 |
| C | -4.13791500 | -2.12395100 | -3.68062700 | C  | 0.73701600  | -1.68658600 | -3.78494500 |
| H | -3.91397600 | -2.46756100 | -4.68876700 | H  | -0.70676700 | -1.47963800 | -2.17823000 |
| H | -5.81633100 | -0.93116800 | -4.28147700 | H  | -2.43541600 | -6.64836100 | -2.30502100 |
| H | -7.19742200 | 0.35854600  | -2.75453400 | C  | 1.85312600  | -2.34635800 | -4.23547200 |
| C | -5.78418600 | -4.40147100 | 3.81302700  | C  | 3.59940500  | -4.06563900 | -3.90704400 |
| C | -4.66905700 | -3.71507300 | 4.22649300  | C  | 3.64102300  | -5.35289400 | -1.86677700 |
| C | -4.12594000 | -2.67833200 | 3.43025200  | H  | 2.13309000  | -4.92353800 | -0.40990300 |
| H | -6.19201800 | -5.20186800 | 4.42743000  | H  | 0.25286300  | -0.93373000 | -4.40636900 |
| H | -4.17628000 | -3.96446500 | 5.16634800  | H  | 2.27556200  | -2.12221800 | -5.21497300 |
| C | -2.92434900 | -2.02665500 | 3.78206800  | C  | 4.17479400  | -5.04611600 | -3.13797900 |
| H | -2.41779700 | -2.35212600 | 4.69340300  | H  | 4.00550800  | -3.81846500 | -4.88804800 |
| C | -3.60844400 | -2.14475700 | -1.31619500 | H  | 4.10630000  | -6.12839800 | -1.26069400 |
| H | -2.99365400 | -2.50191400 | -0.48576500 | H  | 5.04448700  | -5.58911400 | -3.50322200 |
| C | -5.90300100 | -3.06908200 | 1.79760200  | C  | 0.00427200  | -2.03048500 | 3.22738100  |
| H | -6.38391400 | -2.82776600 | 0.85142400  | H  | -0.23979900 | -2.63878300 | 4.10790500  |
| H | -2.52896800 | -3.26250500 | -2.77934000 | H  | 1.05075400  | -1.72756300 | 3.35520900  |
| H | -7.27879700 | -4.63521900 | 2.26074500  | P  | 1.70055100  | -1.25662000 | 0.59051800  |
| C | -3.02455800 | -0.64403100 | 1.80775000  | P  | -2.82879100 | 1.02212400  | 1.04795500  |
| C | -6.08988400 | 0.03693500  | 0.44826400  | C  | -0.87751300 | -0.75968900 | 3.23641600  |
| P | -0.96981500 | 1.51088700  | 0.31746900  | H  | -0.75845300 | -0.26240600 | 4.21159900  |
| C | -2.31418600 | -1.10781600 | 2.96320600  | H  | -0.50683500 | -0.05642800 | -2.47844900 |
| H | -7.73002800 | 1.12259300  | -0.45381300 | Pd | 1.15753800  | 0.74119700  | -0.54000400 |
| H | -6.33368500 | 0.36269600  | 1.45988500  | C  | 1.50641400  | 2.56256600  | -1.79748200 |
| C | -0.19314000 | -2.86872200 | 1.99071400  | C  | 2.86465100  | 0.57416100  | -1.90619300 |
| C | -1.11237000 | -3.89215000 | 2.02322800  | C  | 1.92370200  | 1.43513200  | -2.50658000 |
| C | 0.44650600  | -2.58320900 | 0.74302200  | H  | 3.65602100  | 0.96754900  | -1.26072600 |
| C | -1.47778700 | -4.62506200 | 0.87495800  | H  | 3.04869200  | -0.40176800 | -2.35671800 |
| H | -1.60447300 | -4.14416800 | 2.96293300  | H  | 1.34242800  | 1.08378700  | -3.36163800 |
| C | 0.12853800  | -3.29353100 | -0.40861600 | H  | 0.65929500  | 3.16378800  | -2.12541400 |
| C | -0.83765100 | -4.34008500 | -0.36458300 | H  | 2.18968300  | 3.04410500  | -1.09400500 |
| C | -2.49037500 | -5.61400000 | 0.92656600  | C  | -1.44266300 | 3.23826600  | -0.16591200 |
| C | 0.76501500  | -2.96084800 | -1.71336300 | C  | -2.20521300 | 3.46376600  | -1.34205500 |
| P | 3.37674000  | -2.03718300 | 1.46578700  | C  | -1.15829700 | 4.32376400  | 0.73246400  |

|   |             |             |             |   |             |             |             |
|---|-------------|-------------|-------------|---|-------------|-------------|-------------|
| C | -2.75244200 | 4.74609700  | -1.52478200 | H | -3.45398300 | 7.06980200  | -2.99646200 |
| C | -1.76067300 | 5.54856200  | 0.46723300  | C | -4.13677400 | 7.45416400  | 0.37324200  |
| C | -2.58088300 | 5.78823500  | -0.63578500 | H | -3.58754300 | 7.46084000  | 1.32397600  |
| H | -3.35682100 | 4.92058700  | -2.40875700 | H | -4.60750500 | 8.44041800  | 0.25372400  |
| H | -1.59666100 | 6.37331700  | 1.15106500  | H | -4.93545700 | 6.70314700  | 0.44977600  |
| C | 4.52198500  | -0.58406300 | 1.30288700  | C | -2.12532800 | 8.23086100  | -0.90257800 |
| C | 4.32049500  | 0.56844500  | 2.11336000  | H | -1.51454500 | 8.27167900  | 0.00864200  |
| C | 5.46254000  | -0.53278500 | 0.23968700  | H | -1.45416200 | 8.03988700  | -1.75158600 |
| C | 4.77570400  | 1.79650300  | 1.62545100  | H | -2.57790700 | 9.22273700  | -1.04296900 |
| C | 5.91676000  | 0.72740200  | -0.15697700 | C | 5.32275000  | 4.43893600  | 0.58971700  |
| C | 5.52067000  | 1.91459700  | 0.45444100  | H | 4.22799500  | 4.39020000  | 0.49059300  |
| H | 4.54793300  | 2.69294700  | 2.19688400  | H | 5.56930600  | 4.50049700  | 1.65833700  |
| H | 6.59332200  | 0.78920900  | -1.00707000 | H | 5.65917300  | 5.37468100  | 0.12354600  |
| C | -0.17737300 | 4.27616100  | 1.93648700  | C | 5.71136900  | 3.34692600  | -1.59642400 |
| C | -2.53327000 | 2.51143700  | -2.53052700 | H | 6.08672800  | 4.30090300  | -1.99235500 |
| C | -3.22086000 | 7.16070100  | -0.82166400 | H | 6.18931600  | 2.54115900  | -2.16877400 |
| C | 3.72815100  | 0.55753200  | 3.54133400  | H | 4.63014900  | 3.30581700  | -1.79553700 |
| C | 6.00299500  | 3.25441500  | -0.09414300 | C | 7.51627000  | 3.36236800  | 0.13512600  |
| C | 6.07257600  | -1.73605600 | -0.51071100 | H | 7.89212500  | 4.32308500  | -0.24502500 |
| C | -4.05959100 | 2.37241100  | -2.65072200 | H | 7.75441600  | 3.30285400  | 1.20638900  |
| H | -4.56509400 | 3.32745600  | -2.83644200 | H | 8.06295000  | 2.55933800  | -0.37758400 |
| H | -4.30355100 | 1.69962200  | -3.48551700 | C | 5.54052700  | -1.79565600 | -1.94500100 |
| H | -4.48418900 | 1.93375200  | -1.73543500 | H | 4.46211900  | -2.01231600 | -1.95785300 |
| C | -1.98262100 | 1.08066700  | -2.52890600 | H | 5.71120500  | -0.85292600 | -2.48420100 |
| H | -2.48932400 | 0.41526100  | -1.82121800 | H | 6.03868600  | -2.60211500 | -2.50221600 |
| H | -2.14979000 | 0.65399000  | -3.52963200 | C | 5.83712300  | -3.09390600 | 0.15003200  |
| H | -0.90112200 | 1.02704500  | -2.33938700 | H | 6.45704500  | -3.84974000 | -0.35303900 |
| C | -1.97427500 | 3.15093200  | -3.81838000 | H | 6.11511300  | -3.09081400 | 1.21387700  |
| H | -2.32165000 | 4.17580200  | -3.98678800 | H | 4.80324000  | -3.44918200 | 0.05068200  |
| H | -0.87429100 | 3.17211300  | -3.80365100 | C | 7.60276900  | -1.56065400 | -0.54968900 |
| H | -2.28020300 | 2.55325100  | -4.68801200 | H | 7.92641700  | -0.68201500 | -1.11904000 |
| C | -0.59029600 | 3.29441200  | 3.04533200  | H | 8.01403300  | -1.47707500 | 0.46576600  |
| H | -1.65254000 | 3.41107800  | 3.30352700  | H | 8.05738500  | -2.43811900 | -1.02898000 |
| H | -0.42087500 | 2.24407600  | 2.78725300  | C | 2.28204200  | 1.05692900  | 3.55012300  |
| H | 0.00214500  | 3.49601400  | 3.94912000  | H | 2.22296600  | 2.09420600  | 3.19451400  |
| C | 1.23091800  | 3.94437300  | 1.42645100  | H | 1.63945300  | 0.44882400  | 2.89982600  |
| H | 1.30448700  | 2.92391800  | 1.02505600  | H | 1.86735900  | 1.02503600  | 4.56943900  |
| H | 1.52724500  | 4.65093100  | 0.63668800  | C | 4.55965400  | 1.49266900  | 4.43932900  |
| H | 1.96422800  | 4.02856200  | 2.24303500  | H | 4.19396200  | 1.41836300  | 5.47216000  |
| C | -0.05065800 | 5.64180100  | 2.62958000  | H | 5.62126200  | 1.21003000  | 4.43339900  |
| H | 0.69498800  | 5.55601000  | 3.43016000  | H | 4.48504900  | 2.54793000  | 4.15326000  |
| H | 0.29505700  | 6.43009500  | 1.94787100  | C | 3.81030700  | -0.81438300 | 4.21877300  |
| H | -0.99132500 | 5.96510500  | 3.09535200  | H | 4.82022100  | -1.24153700 | 4.14260600  |
| C | -4.05869600 | 7.24493600  | -2.09551100 | H | 3.56803000  | -0.70870400 | 5.28482400  |
| H | -4.88778100 | 6.52346300  | -2.09070400 | H | 3.10100600  | -1.55185900 | 3.82131800  |
| H | -4.49479200 | 8.24923100  | -2.18066200 |   |             |             |             |

7H<sup>+</sup>

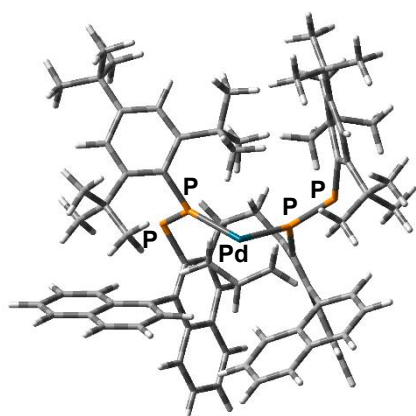

|   |             |             |             |    |             |             |             |
|---|-------------|-------------|-------------|----|-------------|-------------|-------------|
| C | 3.46725100  | -6.27663600 | 2.20737300  | P  | 0.28943400  | 1.90633800  | -0.17311700 |
| C | 4.13568200  | -2.63724000 | -2.15139000 | C  | 5.92517300  | -0.67936600 | 0.18162900  |
| C | 1.93667100  | -4.46039700 | 1.70559300  | C  | 6.46077300  | -2.60810900 | 1.54747900  |
| C | 2.08516400  | -3.79706500 | -1.55839900 | H  | 5.13077100  | -3.01746600 | 3.18541100  |
| C | 1.06749200  | -4.16123800 | -0.62336900 | C  | 4.91570200  | 2.71240900  | -0.27281800 |
| C | 1.13509000  | -3.70593900 | 0.79260200  | C  | 3.97829900  | 1.05623400  | -1.77338100 |
| C | -0.01689700 | -5.51459200 | -2.33143500 | C  | 6.75029500  | -1.73879600 | 0.47218700  |
| C | 0.94571400  | -5.17615400 | -3.24789900 | H  | 6.16717500  | -0.02638100 | -0.65481800 |
| C | 2.01668200  | -4.32096800 | -2.88672200 | H  | 7.11455900  | -3.45372400 | 1.75173300  |
| C | 3.02014900  | -3.96914300 | -3.82347100 | C  | 5.38653400  | 3.44268100  | -1.40726200 |
| C | 4.06050800  | -3.14858500 | -3.46611500 | C  | 5.21531300  | 3.20521200  | 1.02359500  |
| H | 4.83157500  | -2.89277700 | -4.19021400 | C  | 4.44918000  | 1.77492400  | -2.89228500 |
| H | 2.95069100  | -4.37306100 | -4.83349000 | H  | 3.47741600  | 0.09678800  | -1.91261000 |
| H | 0.90719400  | -5.56276700 | -4.26614700 | H  | 7.63560100  | -1.91364400 | -0.13650200 |
| C | 3.43397600  | -5.93913900 | 3.57795200  | C  | 5.13790500  | 2.94736300  | -2.71096400 |
| C | 2.66228400  | -4.88856700 | 4.00905100  | C  | 6.11368400  | 4.64162900  | -1.20211700 |
| C | 1.90169600  | -4.12664600 | 3.08912100  | C  | 5.92285900  | 4.37056900  | 1.18766300  |
| H | 4.02083300  | -6.51606900 | 4.29012200  | H  | 4.88214400  | 2.64192700  | 1.89507600  |
| H | 2.62987500  | -4.61566800 | 5.06401200  | H  | 4.27349600  | 1.38439500  | -3.89425500 |
| C | 1.17137800  | -2.99075700 | 3.50345900  | H  | 5.51364100  | 3.51126400  | -3.56474800 |
| H | 1.21694500  | -2.70577600 | 4.55747700  | C  | 6.37366200  | 5.09999500  | 0.06497400  |
| C | 3.17155300  | -2.94723500 | -1.22086200 | H  | 6.46445400  | 5.19178200  | -2.07550100 |
| H | 3.24368500  | -2.54267900 | -0.20802200 | H  | 6.14379000  | 4.73393000  | 2.18959300  |
| C | 2.73299600  | -5.55988200 | 1.29433400  | H  | 6.93274800  | 6.02244800  | 0.20985100  |
| H | 2.75923400  | -5.83493400 | 0.24135400  | C  | 1.27064000  | 0.08260900  | 3.49156800  |
| H | 4.96989100  | -1.99683900 | -1.86755200 | H  | 1.56726200  | -0.20983400 | 4.50830900  |
| H | 4.07757700  | -7.11389900 | 1.87428400  | H  | 0.90772600  | 1.11890900  | 3.56750900  |
| C | 0.41648100  | -2.60917000 | 1.24648700  | P  | 1.65749300  | 2.33005200  | 1.28659000  |
| C | 0.05477000  | -5.01047900 | -1.01565600 | P  | -0.85343900 | -1.79092100 | 0.17442200  |
| P | -2.43407400 | -2.89326500 | 0.90717700  | C  | 0.08038000  | -0.80533400 | 3.04791100  |
| C | 0.51635800  | -2.17973800 | 2.61130700  | H  | -0.62863800 | -0.85794300 | 3.88674400  |
| H | -0.83470400 | -6.17793100 | -2.60783600 | H  | -0.44666000 | -0.29906800 | 2.22873400  |
| H | -0.69801100 | -5.30561100 | -0.28373600 | Pd | 0.01490300  | -0.15611400 | -1.39253000 |
| C | 2.48040200  | -0.02287900 | 2.60152800  | C  | -0.04716800 | -1.51760100 | -3.16317400 |
| C | 3.39664100  | -1.00676800 | 2.88908900  | C  | 0.84694500  | 0.71357800  | -3.25094900 |
| C | 2.69417300  | 0.80392500  | 1.45022400  | C  | 1.06153800  | -0.67409700 | -3.27961600 |
| C | 4.50730500  | -1.27701600 | 2.06877000  | H  | -0.07842800 | 1.13469100  | -3.65330800 |
| H | 3.26363800  | -1.62249000 | 3.77790700  | H  | 1.69488300  | 1.39134700  | -3.18080500 |
| C | 3.82945700  | 0.62073700  | 0.66022800  | H  | 2.06586900  | -1.07993500 | -3.13281500 |
| C | 4.75407400  | -0.43424800 | 0.94973900  | H  | 0.08598800  | -2.59055900 | -3.03307400 |
| C | 5.36710900  | -2.36997600 | 2.33953000  | H  | -1.01779800 | -1.18448500 | -3.53563500 |
| C | 4.18765300  | 1.50262700  | -0.48584600 | C  | -0.65788300 | 3.50505900  | -0.24410200 |

|   |             |             |             |   |             |             |             |
|---|-------------|-------------|-------------|---|-------------|-------------|-------------|
| C | -2.01531100 | 3.54464600  | 0.21201300  | H | -8.49031900 | 0.45289800  | 0.81361000  |
| C | 0.03663200  | 4.73296800  | -0.42695700 | H | -7.33086700 | 1.75229100  | 0.43944800  |
| C | -2.50016300 | 4.74419500  | 0.71824400  | C | -8.51393900 | -0.76122000 | -1.62183800 |
| C | -0.50338400 | 5.88366500  | 0.16347300  | H | -8.15948500 | -1.38429200 | -2.45353600 |
| C | -1.73612500 | 5.91126300  | 0.79257200  | H | -8.88720200 | -1.43009800 | -0.83380200 |
| H | -3.51763600 | 4.77494200  | 1.09586600  | H | -9.36052200 | -0.16485500 | -1.99054700 |
| H | 0.07241900  | 6.80286700  | 0.09860300  | C | -6.91053700 | 1.07221100  | -2.20358900 |
| C | -4.04151100 | -2.19172600 | 0.32819200  | H | -6.14581300 | 1.77185700  | -1.83649500 |
| C | -4.53946400 | -2.36451400 | -0.99456400 | H | -6.47253000 | 0.49816600  | -3.03084400 |
| C | -4.81846000 | -1.46416400 | 1.28187800  | H | -7.74167000 | 1.66404000  | -2.61235100 |
| C | -5.60032300 | -1.55678800 | -1.40040000 | C | -2.60947600 | 1.34376300  | 1.26807400  |
| C | -5.89366800 | -0.71042700 | 0.79459200  | H | -3.35301100 | 0.53560600  | 1.28681400  |
| C | -6.26500900 | -0.68239200 | -0.54505400 | H | -1.62925900 | 0.88209500  | 1.11116200  |
| H | -5.95146700 | -1.63675700 | -2.42530000 | H | -2.59699100 | 1.83494500  | 2.25337300  |
| H | -6.47052300 | -0.11653100 | 1.49303000  | C | -2.96898200 | 1.69105500  | -1.21847000 |
| C | -4.07535000 | -3.46732700 | -1.97115900 | H | -3.41803600 | 2.37039200  | -1.95764400 |
| C | -4.70696800 | -1.62131900 | 2.82458800  | H | -1.96475800 | 1.43476900  | -1.58475600 |
| C | -7.41863000 | 0.16483200  | -1.07612500 | H | -3.56090700 | 0.76088800  | -1.20573600 |
| C | 1.24827000  | 4.99460300  | -1.34694400 | C | -4.42927000 | 2.74083000  | 0.43733800  |
| C | -2.97174400 | 2.34463800  | 0.17290200  | H | -4.78298000 | 3.52346700  | -0.24848000 |
| C | -2.30098300 | 7.15172800  | 1.47473600  | H | -5.05132500 | 1.84887700  | 0.28240400  |
| C | -3.34244500 | -1.33179600 | 3.46384300  | H | -4.59824800 | 3.07364200  | 1.47059600  |
| H | -2.55324700 | -2.02302100 | 3.14641500  | C | 1.62169100  | 3.81723000  | -2.23980700 |
| H | -3.00300000 | -0.30800000 | 3.26600100  | H | 2.36395800  | 4.14477100  | -2.98142900 |
| H | -3.43311100 | -1.44783000 | 4.55311400  | H | 2.08084500  | 2.98442800  | -1.69701800 |
| C | -5.69155900 | -0.70546500 | 3.56416300  | H | 0.74209900  | 3.45047400  | -2.78970500 |
| H | -6.73998400 | -0.92360200 | 3.32478800  | C | 0.84262200  | 6.11782400  | -2.32612200 |
| H | -5.57167700 | -0.85602100 | 4.64464300  | H | -0.06261100 | 5.84264600  | -2.88546300 |
| H | -5.49521900 | 0.35710800  | 3.35412500  | H | 0.65577000  | 7.07796000  | -1.83241300 |
| C | -5.10424600 | -3.07236400 | 3.14428300  | H | 1.65317500  | 6.27772100  | -3.05038000 |
| H | -6.10025400 | -3.30110100 | 2.74087700  | C | 2.47829000  | 5.45615800  | -0.56014400 |
| H | -4.39457200 | -3.79944400 | 2.72479200  | H | 2.85304500  | 4.66990500  | 0.11037600  |
| H | -5.13186100 | -3.22415300 | 4.23267200  | H | 3.28849700  | 5.71687200  | -1.25632300 |
| C | -2.84200800 | -3.02829400 | -2.75528000 | H | 2.26354300  | 6.34479500  | 0.04788200  |
| H | -3.03327200 | -2.06696600 | -3.25617400 | C | -1.30287300 | 8.30743700  | 1.49693300  |
| H | -1.97285500 | -2.91206600 | -2.10034100 | H | -0.37145800 | 8.03276300  | 2.01135000  |
| H | -2.58368300 | -3.77183700 | -3.52490400 | H | -1.05070100 | 8.65356200  | 0.48488500  |
| C | -5.17118400 | -3.80063300 | -2.99559200 | H | -1.74180700 | 9.15835800  | 2.03477800  |
| H | -4.86451300 | -4.68684900 | -3.56665800 | C | -2.66331800 | 6.80793200  | 2.92491100  |
| H | -6.13200300 | -4.02607200 | -2.51288000 | H | -3.06937500 | 7.69560700  | 3.43022000  |
| H | -5.33085300 | -2.99679800 | -3.72577500 | H | -3.41965300 | 6.01473100  | 2.98692200  |
| C | -3.79625000 | -4.77865800 | -1.22764800 | H | -1.77681500 | 6.47547000  | 3.48283600  |
| H | -4.67306700 | -5.09799600 | -0.64706700 | C | -3.55773600 | 7.61705400  | 0.72909000  |
| H | -3.55436700 | -5.57128800 | -1.94891000 | H | -3.32394800 | 7.86473100  | -0.31575400 |
| H | -2.94403000 | -4.71954400 | -0.53546900 | H | -4.34554800 | 6.85243700  | 0.72799100  |
| C | -8.05039100 | 1.04674800  | 0.00039600  | H | -3.96864800 | 8.51724600  | 1.20798400  |
| H | -8.85993700 | 1.63913400  | -0.44669200 |   |             |             |             |

71<sup>+</sup>

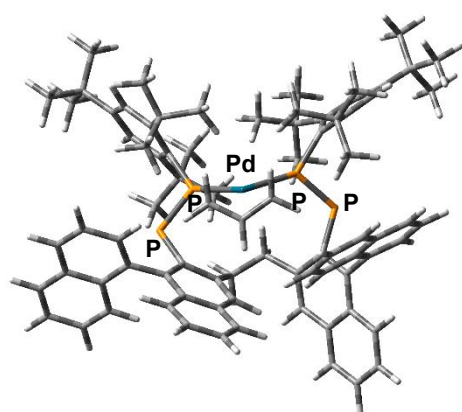

|   |             |             |             |    |             |             |             |
|---|-------------|-------------|-------------|----|-------------|-------------|-------------|
| C | -4.77051500 | -5.83706700 | 2.91911200  | P  | 2.03857600  | 0.65955700  | 0.07818500  |
| C | -2.93035100 | -4.22817100 | -2.29470400 | C  | 2.59755600  | -5.13958900 | -1.79960900 |
| C | -3.74570500 | -3.72828200 | 2.30051400  | C  | 0.55214400  | -6.41173700 | -1.56701300 |
| C | -4.37559200 | -2.92635800 | -0.83511400 | H  | -0.81213600 | -5.77815200 | -0.03504300 |
| C | -4.69224800 | -2.35152400 | 0.43688600  | C  | 5.45004400  | -3.18237900 | -0.10848400 |
| C | -3.70987800 | -2.52612200 | 1.54108900  | C  | 4.51123000  | -2.41168300 | -2.20833200 |
| C | -6.81227000 | -1.56113600 | -0.45023900 | C  | 1.79681600  | -6.18241000 | -2.19559200 |
| C | -6.51684100 | -2.07725700 | -1.68614600 | H  | 3.55621800  | -4.96986800 | -2.28702200 |
| C | -5.30244800 | -2.77395700 | -1.90868900 | H  | -0.07164700 | -7.24282900 | -1.89096900 |
| C | -4.99195400 | -3.33417600 | -3.17280300 | C  | 6.75547900  | -2.90084700 | -0.61492400 |
| C | -3.83371700 | -4.04675800 | -3.36505400 | C  | 5.34046900  | -3.75005500 | 1.18705600  |
| H | -3.61398700 | -4.48170800 | -4.33810900 | C  | 5.80271000  | -2.14104000 | -2.70515500 |
| H | -5.70244000 | -3.19818800 | -3.98827600 | H  | 3.66040000  | -2.23581700 | -2.86563900 |
| H | -7.21631600 | -1.97018500 | -2.51519100 | H  | 2.12235400  | -6.84020900 | -2.99908500 |
| C | -3.80159600 | -6.01917000 | 3.93184400  | C  | 6.90153500  | -2.36742800 | -1.91801100 |
| C | -2.81685700 | -5.08236800 | 4.12098900  | C  | 7.88725600  | -3.17195300 | 0.19298400  |
| C | -2.76225000 | -3.92239100 | 3.31078900  | C  | 6.45840400  | -4.00885100 | 1.94235100  |
| H | -3.83594700 | -6.90927500 | 4.55710800  | H  | 4.35440700  | -3.99162100 | 1.58081000  |
| H | -2.05744700 | -5.21863500 | 4.89079200  | H  | 5.91475800  | -1.74776400 | -3.71370800 |
| C | -1.71766700 | -2.98032500 | 3.42941700  | H  | 7.90497300  | -2.15494600 | -2.28639000 |
| H | -0.92575000 | -3.19965200 | 4.14748200  | C  | 7.74615800  | -3.71191800 | 1.44597800  |
| C | -3.18953800 | -3.67370600 | -1.06395700 | H  | 8.87522100  | -2.94639800 | -0.20850200 |
| H | -2.47411400 | -3.80248100 | -0.24995700 | H  | 6.35070500  | -4.45042800 | 2.93144100  |
| C | -4.74203100 | -4.72270400 | 2.11829800  | H  | 8.62283000  | -3.92040400 | 2.05609900  |
| H | -5.49651000 | -4.58687900 | 1.34481800  | C  | 0.92613700  | -1.84680100 | 2.63205000  |
| H | -2.01627500 | -4.80394000 | -2.44551200 | H  | 0.91224600  | -2.59157400 | 3.44023800  |
| H | -5.54445000 | -6.58854200 | 2.77491000  | H  | 1.76347900  | -1.18682300 | 2.89414000  |
| C | -2.71654200 | -1.56778600 | 1.74922500  | P  | 3.40590100  | -0.68710900 | 0.80045400  |
| C | -5.89742000 | -1.70536400 | 0.61544300  | P  | -3.26438300 | 0.13349100  | 1.25414000  |
| P | -1.93676700 | 1.05820100  | 0.00272700  | C  | -0.37301300 | -1.02108100 | 2.69013200  |
| C | -1.62997000 | -1.85632900 | 2.63963300  | H  | -0.35000300 | -0.42847000 | 3.61967300  |
| H | -7.75335400 | -1.04189800 | -0.28106300 | H  | -0.37127900 | -0.29878600 | 1.86135700  |
| H | -6.14348800 | -1.30138100 | 1.59752100  | Pd | -0.05541600 | -0.01583100 | -1.02448200 |
| C | 1.26507100  | -2.57777800 | 1.34918700  | C  | -1.39456600 | -1.10305900 | -2.42957900 |
| C | 0.54299400  | -3.68782000 | 0.96579700  | C  | 0.99275400  | -1.24883300 | -2.54462600 |
| C | 2.43807900  | -2.25049800 | 0.59474900  | C  | -0.22919200 | -1.86155400 | -2.25282700 |
| C | 0.93768300  | -4.50825900 | -0.11533500 | H  | 1.04925100  | -0.48067000 | -3.31928500 |
| H | -0.34653100 | -3.98008700 | 1.52639900  | H  | 1.92122400  | -1.73669700 | -2.26687700 |
| C | 2.94431800  | -3.12284700 | -0.36639600 | H  | -0.25559500 | -2.78248400 | -1.66431100 |
| C | 2.18466700  | -4.26142100 | -0.76411700 | H  | -2.34396200 | -1.48261500 | -2.05723000 |
| C | 0.13830100  | -5.59876600 | -0.54109200 | H  | -1.44344800 | -0.35510500 | -3.22238200 |
| C | 4.31024400  | -2.89003400 | -0.92859700 | C  | 3.01706600  | 2.24221700  | 0.13931300  |



|   |             |            |             |   |             |             |             |
|---|-------------|------------|-------------|---|-------------|-------------|-------------|
| C | 3.52412100  | 2.72389500 | 1.37969100  | H | 1.78770900  | 0.67031500  | 2.82652300  |
| C | 3.48476900  | 2.82800800 | -1.08715900 | H | 1.26754200  | 1.90055900  | 3.96143800  |
| C | 4.62233200  | 3.59682600 | 1.34065800  | C | 4.03145900  | 1.76249000  | 3.67129000  |
| C | 4.53255300  | 3.73801200 | -1.01635500 | H | 3.65005200  | 1.63824400  | 4.69485900  |
| C | 5.16339100  | 4.10138100 | 0.17370600  | H | 4.23586600  | 0.76228700  | 3.26247800  |
| H | 5.05925500  | 3.90121000 | 2.28639500  | H | 4.98425600  | 2.30271700  | 3.73528600  |
| H | 4.90587400  | 4.17528800 | -1.93643500 | C | 2.72253900  | 3.88610000  | 3.44682700  |
| C | -2.89823700 | 2.64894500 | -0.23793600 | H | 3.61457400  | 4.51819400  | 3.51512600  |
| C | -3.89523600 | 2.74613000 | -1.24973200 | H | 1.96628400  | 4.44077600  | 2.87247600  |
| C | -2.84343500 | 3.64827800 | 0.77723400  | H | 2.33707300  | 3.75519700  | 4.46720700  |
| C | -4.94979200 | 3.64041300 | -1.04797800 | C | -0.34644700 | 3.81294200  | 0.78367300  |
| C | -3.94311800 | 4.49220700 | 0.91746500  | H | -0.14654800 | 2.78389600  | 0.45739600  |
| C | -5.04196700 | 4.46868400 | 0.06386000  | H | -0.43502000 | 4.43359400  | -0.11997600 |
| H | -5.73475200 | 3.68569300 | -1.79508200 | H | 0.54065700  | 4.15107300  | 1.33602800  |
| H | -3.93626700 | 5.21827400 | 1.72539500  | C | -1.55051100 | 3.07336300  | 2.90880000  |
| C | 2.98984400  | 2.50044400 | 2.81886700  | H | -1.36384900 | 2.01437000  | 2.69917400  |
| C | 2.93797600  | 2.50754100 | -2.49563100 | H | -0.75301000 | 3.42789400  | 3.57778600  |
| C | 6.35556600  | 5.05156800 | 0.14517000  | H | -2.50253100 | 3.14381100  | 3.45435800  |
| C | -1.60594600 | 3.94547400 | 1.64835200  | C | -1.61156900 | 5.40389800  | 2.13721400  |
| C | -6.23070000 | 5.38737700 | 0.32382700  | H | -1.75408300 | 6.11528800  | 1.31246800  |
| C | -3.84214200 | 2.00108100 | -2.59725200 | H | -2.37847500 | 5.59427400  | 2.89860000  |
| C | 1.41302600  | 2.67013600 | -2.54765300 | H | -0.64229000 | 5.62041800  | 2.60669200  |
| H | 1.02299700  | 2.32042100 | -3.51575000 | C | -2.42437000 | 2.12393200  | -3.17506400 |
| H | 0.87732700  | 2.12167000 | -1.76311100 | H | -1.64073700 | 1.73577600  | -2.51345100 |
| H | 1.13996800  | 3.72937500 | -2.43591700 | H | -2.35402600 | 1.58919900  | -4.13399100 |
| C | 3.40164300  | 1.11184600 | -2.93550900 | H | -2.18792400 | 3.18132200  | -3.36349400 |
| H | 4.49946700  | 1.05381100 | -2.90863600 | C | -4.31555800 | 0.55071300  | -2.45961100 |
| H | 3.02257600  | 0.30570700 | -2.30041600 | H | -3.75363700 | -0.02493800 | -1.71901700 |
| H | 3.07597400  | 0.91110900 | -3.96722800 | H | -5.36821400 | 0.52974800  | -2.14225600 |
| C | 3.46590900  | 3.46972900 | -3.57053600 | H | -4.24463900 | 0.02716600  | -3.42570400 |
| H | 3.26229300  | 4.52047400 | -3.32458500 | C | -4.75703900 | 2.64191100  | -3.65085900 |
| H | 4.54166100  | 3.35234200 | -3.75441400 | H | -5.82285900 | 2.50855300  | -3.42571700 |
| H | 2.95306100  | 3.24601900 | -4.51549800 | H | -4.55649300 | 3.71433100  | -3.77668100 |
| C | 7.46429400  | 4.45327000 | -0.72935700 | H | -4.57305600 | 2.15136500  | -4.61628300 |
| H | 7.13893000  | 4.29861400 | -1.76631300 | C | -7.35110400 | 5.19084600  | -0.69510000 |
| H | 8.33032100  | 5.12977300 | -0.75082500 | H | -7.03448300 | 5.45698300  | -1.71306900 |
| H | 7.79964400  | 3.48536700 | -0.33148200 | H | -7.71565600 | 4.15417000  | -0.70586800 |
| C | 5.91317200  | 6.39914200 | -0.43803000 | H | -8.19872200 | 5.83926900  | -0.43563600 |
| H | 6.76305500  | 7.09592600 | -0.45981200 | C | -5.77073500 | 6.84891100  | 0.25515200  |
| H | 5.53483700  | 6.30347700 | -1.46423300 | H | -4.99748000 | 7.07471200  | 1.00136000  |
| H | 5.11969800  | 6.84940400 | 0.17457100  | H | -5.36199000 | 7.08440200  | -0.73743100 |
| C | 6.93382800  | 5.30107300 | 1.53670200  | H | -6.62089300 | 7.52046900  | 0.44134200  |
| H | 6.20371400  | 5.77467300 | 2.20801200  | C | -6.79847400 | 5.09351900  | 1.71774500  |
| H | 7.28359400  | 4.37125600 | 2.00680400  | H | -7.65529300 | 5.75122900  | 1.92117200  |
| H | 7.79535600  | 5.97747500 | 1.45835400  | H | -7.14444400 | 4.05288200  | 1.78864500  |
| C | 1.67122900  | 1.74518600 | 2.95070200  | H | -6.05786100 | 5.25830300  | 2.51104000  |
| H | 0.91009500  | 2.09809100 | 2.24499700  |   |             |             |             |

7bx

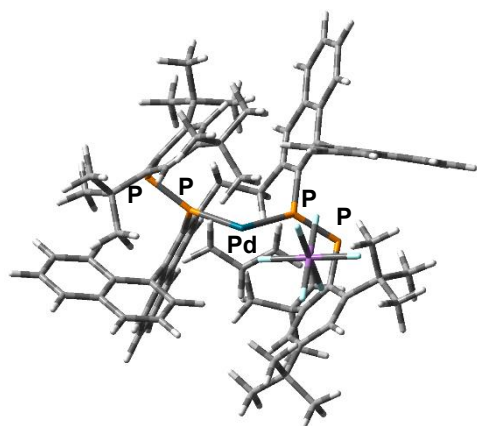

|    |             |             |             |   |             |             |             |
|----|-------------|-------------|-------------|---|-------------|-------------|-------------|
| Sb | 4.19730900  | -3.03839800 | 1.82594200  | C | 1.05225400  | -3.60812100 | -2.96156800 |
| F  | 2.38506800  | -3.14527900 | 2.34482600  | H | 3.13527100  | -3.64365500 | -2.49628100 |
| F  | 4.35473300  | -4.90182900 | 1.98730100  | H | -0.92266800 | -3.27831900 | -3.70369200 |
| F  | 4.70722400  | -2.80733100 | 3.62050900  | C | -0.92181200 | -0.85808800 | -4.68591200 |
| F  | 4.03064000  | -1.16289800 | 1.65117200  | C | 4.02312000  | -1.17570500 | -3.01775300 |
| F  | 5.98160000  | -2.90420400 | 1.25644300  | C | -0.61728800 | 3.83390600  | -2.01741400 |
| F  | 3.66607000  | -3.24873600 | 0.01690000  | H | 3.70233900  | 1.28256200  | 2.38377100  |
| C  | 2.38461400  | 7.34962000  | 0.05812000  | C | 0.86305900  | -5.08357800 | -2.61731000 |
| C  | 5.29939500  | 3.64764000  | -3.01442700 | H | 1.70594200  | 2.41652800  | 1.41137000  |
| C  | 1.49349800  | 5.24159300  | -0.75143300 | C | -3.90887600 | 1.97427800  | -1.77360500 |
| C  | 3.97870100  | 3.12521400  | -1.04402300 | C | -4.79495000 | 1.97104400  | -2.82331900 |
| C  | 2.73940800  | 3.10274600  | -0.33516300 | C | -3.78667700 | 0.79787200  | -0.96877100 |
| C  | 1.55635600  | 3.82110100  | -0.88305200 | C | -5.55508300 | 0.82856100  | -3.15821500 |
| C  | 3.79273700  | 1.82256800  | 1.44336000  | H | -4.90297700 | 2.86882300  | -3.43634000 |
| C  | 5.00412600  | 1.87994500  | 0.80455700  | C | -4.52021700 | -0.34339500 | -1.26091100 |
| C  | 5.12716700  | 2.52290100  | -0.44941700 | C | -5.40912900 | -0.35490100 | -2.37859500 |
| C  | 6.35391200  | 2.52682500  | -1.15732700 | C | -6.43583900 | 0.82507900  | -4.26717400 |
| C  | 6.43989100  | 3.06948700  | -2.41522600 | C | -4.41074100 | -1.57298100 | -0.42617500 |
| H  | 7.38451800  | 3.05314900  | -2.95579100 | P | -3.70957800 | 1.47831700  | 2.00387000  |
| H  | 7.22420100  | 2.06593700  | -0.68921500 | C | -6.14705100 | -1.50768200 | -2.75172200 |
| H  | 5.88096400  | 1.39686100  | 1.23615200  | C | -7.13805300 | -0.30559300 | -4.60112800 |
| C  | 1.28329100  | 8.03841700  | -0.49638000 | H | -6.53816500 | 1.73819700  | -4.85352600 |
| C  | 0.30312000  | 7.34612400  | -1.16176500 | C | -5.41645000 | -1.86245600 | 0.54691800  |
| C  | 0.37756800  | 5.93834900  | -1.29826000 | C | -3.37675600 | -2.46487800 | -0.62306400 |
| H  | 1.21345100  | 9.11940000  | -0.39014100 | C | -2.39362600 | 1.43579600  | 3.31569900  |
| H  | -0.55554700 | 7.86567700  | -1.58699400 | C | -6.98823300 | -1.48352300 | -3.83679100 |
| C  | -0.65077100 | 5.20452400  | -1.92913800 | H | -6.03616700 | -2.42111600 | -2.16965400 |
| H  | -1.50738800 | 5.74828600  | -2.33418500 | H | -7.80951900 | -0.29949100 | -5.45773600 |
| C  | 4.10180000  | 3.68478800  | -2.34163600 | C | -5.33349000 | -3.07846200 | 1.28801100  |
| H  | 3.22831900  | 4.13824100  | -2.80943600 | C | -6.49597600 | -0.98085600 | 0.80856400  |
| C  | 2.48987300  | 5.98668700  | -0.06957100 | C | -3.29183800 | -3.66233600 | 0.12298300  |
| H  | 3.34039200  | 5.46319700  | 0.36398400  | H | -2.61285500 | -2.24148500 | -1.37127900 |
| H  | 5.37208500  | 4.07035400  | -4.01492400 | C | -2.23967200 | 0.27024100  | 4.11518300  |
| H  | 3.15427700  | 7.90477800  | 0.59105500  | C | -1.39511800 | 2.44273100  | 3.35226100  |
| C  | 0.51926800  | 3.13756700  | -1.49990600 | H | -7.54350200 | -2.37834700 | -4.11167300 |
| C  | 2.66007100  | 2.44626700  | 0.87783900  | C | -4.25300000 | -3.96478200 | 1.05345900  |
| P  | 1.56529100  | 0.98371700  | -3.38089400 | C | -6.32844000 | -3.36804300 | 2.25338500  |
| C  | 1.45755500  | -0.86581000 | -3.50872800 | C | -7.44627300 | -1.29069500 | 1.75156700  |
| C  | 2.56654900  | -1.68024900 | -3.12034900 | H | -6.56675700 | -0.04807600 | 0.24996300  |
| C  | 0.22580200  | -1.47730700 | -3.85369000 | H | -2.46133800 | -4.34710100 | -0.04947900 |
| C  | 2.31631500  | -3.02304900 | -2.84661100 | C | -0.97657200 | 0.01609800  | 4.65233200  |
| C  | 0.04605700  | -2.82497500 | -3.50852700 | C | -3.35996000 | -0.70843300 | 4.53097000  |

|   |             |             |             |    |             |             |             |
|---|-------------|-------------|-------------|----|-------------|-------------|-------------|
| C | -0.16196400 | 2.12123600  | 3.93144700  | H  | -0.63616800 | 1.33914900  | -4.62678800 |
| C | -1.56589100 | 3.91833100  | 2.92921400  | C  | -1.19678300 | -1.79942700 | -5.87657700 |
| H | -4.19804000 | -4.88721100 | 1.63197200  | H  | -2.00647100 | -1.38348800 | -6.49191300 |
| C | -7.36464100 | -2.49638900 | 2.48085600  | H  | -1.50436400 | -2.80606300 | -5.57322100 |
| H | -6.25147600 | -4.29968800 | 2.81471300  | H  | -0.30403500 | -1.89526500 | -6.51029300 |
| H | -8.26799000 | -0.60189800 | 1.93910900  | C  | 2.44986100  | 1.67798700  | 5.06079400  |
| C | 0.10147700  | 0.89071200  | 4.52487300  | H  | 2.09874600  | 2.47111700  | 5.73642700  |
| H | -0.82597500 | -0.91617800 | 5.19444900  | H  | 2.59966600  | 2.12196700  | 4.06677300  |
| H | 0.61864500  | 2.87827100  | 3.92428900  | H  | 3.43258800  | 1.34185100  | 5.41848300  |
| H | -8.12373500 | -2.73044600 | 3.22493600  | C  | 1.40721800  | -0.07608100 | 6.45171700  |
| C | 1.48543100  | 0.49339800  | 5.03109200  | H  | 0.80665800  | -0.99292200 | 6.50631500  |
| C | -3.00748400 | 3.15993600  | -1.57863700 | H  | 0.97560700  | 0.65630400  | 7.14830000  |
| H | -3.56165100 | 4.09724500  | -1.72921900 | H  | 2.41646900  | -0.32842800 | 6.80585700  |
| H | -2.62093800 | 3.19699100  | -0.55027300 | C  | 2.04129100  | -0.57435100 | 4.08215100  |
| P | -2.60119200 | 0.76743100  | 0.44094200  | H  | 2.09000000  | -0.19480600 | 3.04988300  |
| P | 0.58726500  | 1.30289700  | -1.61202700 | H  | 1.42114800  | -1.48142300 | 4.07350000  |
| C | -1.81413300 | 3.10330500  | -2.55769000 | H  | 3.05974400  | -0.87817200 | 4.36544900  |
| H | -1.56909700 | 2.04890700  | -2.74843500 | C  | -3.32436400 | -0.83492700 | 6.06622500  |
| H | -2.12299400 | 3.51774500  | -3.52914800 | H  | -3.46596800 | 0.14552700  | 6.54202200  |
| C | 4.27858800  | -0.40073100 | -1.72209700 | H  | -2.38777500 | -1.26091300 | 6.44368800  |
| H | 4.14319400  | -1.03994300 | -0.83966900 | H  | -4.13861600 | -1.49411700 | 6.39720300  |
| H | 3.63200800  | 0.47944300  | -1.61314200 | C  | -4.77912000 | -0.24835200 | 4.19428000  |
| H | 5.31701200  | -0.03683400 | -1.71572500 | H  | -5.49696300 | -0.89943500 | 4.71311700  |
| C | 4.38065300  | -0.30058800 | -4.22708100 | H  | -5.02245200 | -0.32995100 | 3.12556400  |
| H | 5.44991700  | -0.04828600 | -4.19366400 | H  | -4.96946000 | 0.78238800  | 4.52686400  |
| H | 3.84043300  | 0.65617200  | -4.24936200 | C  | -3.14744100 | -2.09058000 | 3.91037400  |
| H | 4.18173200  | -0.82681500 | -5.17129100 | H  | -2.15104000 | -2.49757000 | 4.13227900  |
| C | 5.02191400  | -2.34180400 | -3.02298900 | H  | -3.27420400 | -2.05256000 | 2.81930400  |
| H | 4.88135400  | -3.00565600 | -3.88764200 | H  | -3.89592400 | -2.79842800 | 4.29723400  |
| H | 4.96294800  | -2.93578900 | -2.10225600 | C  | -2.96913100 | 4.32574000  | 2.47663000  |
| H | 6.03946600  | -1.93223400 | -3.07691300 | H  | -3.01066500 | 5.42168400  | 2.40422200  |
| C | 1.73257000  | -5.92025900 | -3.56613900 | H  | -3.74296700 | 4.02011800  | 3.19538400  |
| H | 1.58706100  | -6.99152800 | -3.36633500 | H  | -3.23803100 | 3.94519100  | 1.48288400  |
| H | 2.80110400  | -5.69922300 | -3.44432400 | C  | -0.57869100 | 4.29259200  | 1.82097700  |
| H | 1.46371000  | -5.72841300 | -4.61446000 | H  | -0.72658100 | 3.67070300  | 0.92433700  |
| C | 1.28985200  | -5.36073000 | -1.17053400 | H  | 0.46686200  | 4.17759000  | 2.14005100  |
| H | 0.59440200  | -4.89770900 | -0.45468000 | H  | -0.71487700 | 5.34492500  | 1.52758300  |
| H | 2.29486000  | -4.98560800 | -0.94364400 | C  | -1.27788100 | 4.78294700  | 4.17225900  |
| H | 1.27760600  | -6.44365600 | -0.98105900 | H  | -1.39140800 | 5.84558100  | 3.91615900  |
| C | -0.58634300 | -5.53692800 | -2.77894800 | H  | -0.26335500 | 4.64611000  | 4.56348100  |
| H | -0.92750400 | -5.47107400 | -3.82169000 | H  | -1.98604900 | 4.55031400  | 4.97989700  |
| H | -1.27320500 | -4.94343200 | -2.15646300 | Pd | -0.42193400 | -0.08358200 | 0.02489800  |
| H | -0.67928300 | -6.58612900 | -2.46741900 | C  | 1.37092800  | -1.36397800 | 0.15149700  |
| C | -2.19648800 | -0.73698700 | -3.84625400 | C  | -0.60509800 | -1.72916500 | 1.49402500  |
| H | -2.02639500 | -0.14070800 | -2.93643500 | C  | 0.24029900  | -2.13504400 | 0.45298100  |
| H | -2.57531400 | -1.72111200 | -3.53478800 | H  | -0.20652600 | -1.20274500 | 2.36671000  |
| H | -2.99494000 | -0.24844500 | -4.42590000 | H  | -1.57722700 | -2.20383400 | 1.61625300  |
| C | -0.62884400 | 0.49958900  | -5.33129200 | H  | -0.12043900 | -2.85264500 | -0.28941000 |
| H | -1.41668200 | 0.71472400  | -6.06695300 | H  | 1.93117200  | -1.57319800 | -0.75580700 |
| H | 0.32768600  | 0.50100600  | -5.87346400 | H  | 1.90508300  | -0.82045500 | 0.93424700  |

7by

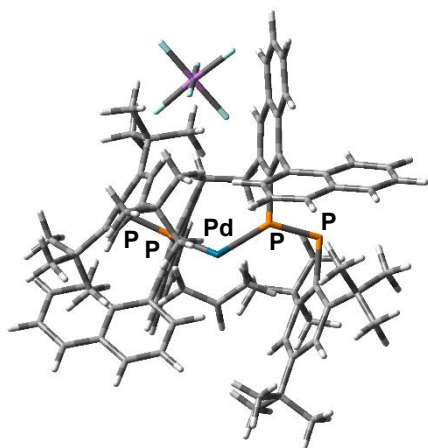

|   |             |             |             |   |             |             |             |
|---|-------------|-------------|-------------|---|-------------|-------------|-------------|
| C | -3.83461900 | 5.60310000  | 1.46275200  | H | 2.02334100  | 3.68159800  | 3.67943500  |
| C | 0.94448300  | 7.04734100  | -1.30533000 | C | 6.62269700  | -0.77217000 | -2.22279300 |
| C | -2.32102600 | 4.05947700  | 0.36115500  | H | 0.17418000  | 2.60789100  | 2.39800300  |
| C | 0.72213300  | 5.31676100  | 0.38327000  | C | -1.69855600 | -1.95038600 | -1.60231500 |
| C | 0.13756800  | 4.10666700  | 0.86758800  | C | -2.13594400 | -2.58310000 | -2.74050300 |
| C | -1.02283500 | 3.50181800  | 0.15613100  | C | -0.57275400 | -2.48881500 | -0.90785300 |
| C | 1.66285000  | 4.14724400  | 2.76235700  | C | -1.46528000 | -3.70964300 | -3.26782200 |
| C | 2.20398500  | 5.33440700  | 2.33916400  | H | -3.01570600 | -2.19387000 | -3.25938800 |
| C | 1.75376900  | 5.94350900  | 1.14342800  | C | 0.12029600  | -3.58632600 | -1.39287500 |
| C | 2.33815800  | 7.13980700  | 0.66152300  | C | -0.30707500 | -4.21101500 | -2.60271000 |
| C | 1.94877000  | 7.67903900  | -0.53976000 | C | -1.89793300 | -4.33177300 | -4.46430300 |
| H | 2.41361500  | 8.59215800  | -0.90695000 | C | 1.31359100  | -4.10783600 | -0.66914400 |
| H | 3.11996700  | 7.61271600  | 1.25649600  | P | -1.23062200 | -2.67663900 | 2.03296000  |
| H | 2.99689500  | 5.81961800  | 2.90842400  | C | 0.38449900  | -5.30868500 | -3.17600000 |
| C | -4.93333900 | 5.02169500  | 0.79083000  | C | -1.20993100 | -5.39572100 | -4.99150200 |
| C | -4.73482500 | 3.98604900  | -0.08740700 | H | -2.78580600 | -3.94083400 | -4.96095400 |
| C | -3.43041000 | 3.48741000  | -0.32499800 | C | 1.21329400  | -5.27957000 | 0.14133800  |
| H | -5.93847100 | 5.39507000  | 0.97888900  | C | 2.52981700  | -3.46344700 | -0.78519900 |
| H | -5.56906300 | 3.50419100  | -0.59838100 | C | -0.80142500 | -1.71707100 | 3.56142900  |
| C | -3.22610100 | 2.38799000  | -1.18466100 | C | -0.05514300 | -5.88535200 | -4.34208600 |
| H | -4.08823200 | 1.94273000  | -1.67560000 | H | 1.27658000  | -5.69027700 | -2.68146800 |
| C | 0.33814800  | 5.90072400  | -0.85023100 | H | -1.54961600 | -5.86320800 | -5.91387900 |
| H | -0.44255800 | 5.42375600  | -1.44212100 | C | 2.38596600  | -5.78555600 | 0.77726800  |
| C | -2.56021200 | 5.13566500  | 1.25426000  | C | -0.02125600 | -5.93801100 | 0.37082000  |
| H | -1.72254700 | 5.58180000  | 1.78842000  | C | 3.68173600  | -3.95414100 | -0.13118600 |
| H | 0.64510300  | 7.47596600  | -2.26004000 | H | 2.60351400  | -2.56124600 | -1.39692500 |
| H | -4.00243300 | 6.42341700  | 2.15848800  | C | 0.23030600  | -2.17680200 | 4.43093700  |
| C | -0.87075000 | 2.39963600  | -0.67224000 | C | -1.36006400 | -0.42951500 | 3.75553500  |
| C | 0.61894100  | 3.53731300  | 2.03047400  | H | 0.48885900  | -6.72509300 | -4.77054400 |
| P | 1.51091800  | 2.63748800  | -2.53244400 | C | 3.61484000  | -5.09924600 | 0.62111300  |
| C | 3.12364100  | 1.75255200  | -2.77651700 | C | 2.28752000  | -6.94295000 | 1.58743200  |
| C | 4.33331100  | 2.30965000  | -2.25885600 | C | -0.08839000 | -7.04486100 | 1.18268200  |
| C | 3.13607000  | 0.45652700  | -3.34694900 | H | -0.92445100 | -5.54998400 | -0.09941500 |
| C | 5.41475900  | 1.44933300  | -2.08528400 | H | 4.62894100  | -3.42506800 | -0.23895500 |
| C | 4.25467500  | -0.35475700 | -3.10225900 | C | 0.86663800  | -1.22961700 | 5.23064200  |
| C | 5.38592000  | 0.09610800  | -2.43857000 | C | 0.65591600  | -3.65396700 | 4.57966400  |
| H | 6.33669800  | 1.84557600  | -1.66799800 | C | -0.66237500 | 0.46490500  | 4.57877100  |
| H | 4.24161800  | -1.37245000 | -3.48450800 | C | -2.73737600 | 0.06611300  | 3.25986500  |
| C | 2.10848600  | -0.12844400 | -4.34432300 | H | 4.50152300  | -5.49211200 | 1.11879500  |
| C | 4.53873800  | 3.81353600  | -1.96259300 | C | 1.07755300  | -7.55889800 | 1.79110000  |
| C | -1.98940900 | 1.81340700  | -1.34222700 | H | 3.19254000  | -7.32397200 | 2.06141900  |

|   |             |             |             |    |             |             |             |
|---|-------------|-------------|-------------|----|-------------|-------------|-------------|
| H | -1.04610400 | -7.53244600 | 1.35548900  | H  | -0.32127300 | 2.45303500  | 6.64057900  |
| C | 0.48971200  | 0.11528200  | 5.26970100  | H  | 0.49140800  | 2.93028100  | 5.13351400  |
| H | 1.70041300  | -1.54772200 | 5.85199100  | H  | 1.29292500  | 3.18729200  | 6.69211700  |
| H | -1.05690400 | 1.47229500  | 4.68735000  | C  | 1.52050700  | 0.63454700  | 7.50553000  |
| H | 1.01191000  | -8.44161100 | 2.42446500  | H  | 2.06327400  | -0.31789200 | 7.55404400  |
| C | 1.31439200  | 1.12043400  | 6.06658300  | H  | 0.55666300  | 0.50251100  | 8.01617500  |
| C | -2.33456400 | -0.66023500 | -1.18109100 | H  | 2.10521700  | 1.37459900  | 8.06991600  |
| H | -3.42578700 | -0.72707100 | -1.21232600 | C  | 2.67819700  | 1.26604900  | 5.37866200  |
| H | -2.07753100 | -0.41991800 | -0.13970600 | H  | 2.55328000  | 1.58271900  | 4.33041800  |
| P | -0.05613200 | -1.70717400 | 0.66945200  | H  | 3.23792100  | 0.32023500  | 5.37814100  |
| P | 0.79459200  | 1.65952800  | -0.88678200 | H  | 3.29198400  | 2.02127300  | 5.89088700  |
| C | -1.87698300 | 0.50933700  | -2.07946700 | C  | 1.17534500  | -3.92578800 | 6.00062300  |
| H | -0.84158100 | 0.32580400  | -2.40220400 | H  | 0.44947500  | -3.61501500 | 6.76452100  |
| H | -2.49444900 | 0.52015600  | -2.98760600 | H  | 2.13133200  | -3.43085600 | 6.21077500  |
| C | 3.98474600  | 4.22727600  | -0.59642600 | H  | 1.34903800  | -5.00377000 | 6.11635600  |
| H | 4.52198800  | 3.72400300  | 0.22126000  | C  | -0.52048800 | -4.61757400 | 4.37938200  |
| H | 2.91339200  | 4.01722600  | -0.48154900 | H  | -0.21281500 | -5.63337600 | 4.66401400  |
| H | 4.11640500  | 5.31051800  | -0.45804200 | H  | -0.85526700 | -4.68785100 | 3.33615200  |
| C | 3.90156500  | 4.67807100  | -3.05980100 | H  | -1.38231300 | -4.33393800 | 4.99925700  |
| H | 4.17612200  | 5.73046200  | -2.90299800 | C  | 1.77781000  | -4.01166600 | 3.60380400  |
| H | 2.80419500  | 4.64572500  | -3.06046500 | H  | 2.67743900  | -3.41123200 | 3.80552100  |
| H | 4.25288200  | 4.37596600  | -4.05607000 | H  | 1.47949200  | -3.85389200 | 2.55793000  |
| C | 6.03017200  | 4.17941900  | -1.96190900 | H  | 2.04958900  | -5.07242100 | 3.71083400  |
| H | 6.52937700  | 3.87226900  | -2.89133500 | C  | -3.60186100 | -0.96098500 | 2.52529600  |
| H | 6.57400000  | 3.74331400  | -1.11413800 | H  | -4.61504700 | -0.55132000 | 2.41518100  |
| H | 6.12681700  | 5.26932400  | -1.87159900 | H  | -3.68861900 | -1.90426200 | 3.08393600  |
| C | 7.78952000  | -0.18129100 | -3.02650800 | H  | -3.26720400 | -1.17419100 | 1.50255100  |
| H | 8.68034400  | -0.81641400 | -2.91947200 | C  | -2.59044200 | 1.30019300  | 2.36580800  |
| H | 8.05714500  | 0.82799600  | -2.68722100 | H  | -1.95860000 | 1.09002100  | 1.48955700  |
| H | 7.53783400  | -0.12393400 | -4.09460800 | H  | -2.14636900 | 2.15195500  | 2.90119500  |
| C | 6.99951600  | -0.80273800 | -0.73783300 | H  | -3.57513300 | 1.62072900  | 1.99319900  |
| H | 6.24611200  | -1.34769200 | -0.15027700 | C  | -3.55193900 | 0.44908900  | 4.51184200  |
| H | 7.10067500  | 0.20333400  | -0.30917800 | H  | -4.54203300 | 0.81425100  | 4.20600800  |
| H | 7.95786400  | -1.32360500 | -0.60204700 | H  | -3.07935900 | 1.23869800  | 5.10719000  |
| C | 6.41139300  | -2.21094200 | -2.68922200 | H  | -3.69819600 | -0.42430900 | 5.16294600  |
| H | 6.24309900  | -2.27143600 | -3.77352200 | Pd | 1.59869400  | -0.01938200 | 0.58446900  |
| H | 5.55629700  | -2.68561900 | -2.18520000 | C  | 3.45988000  | 1.09721200  | 1.06065000  |
| H | 7.30507300  | -2.80692000 | -2.46027700 | C  | 2.85898000  | -1.02633600 | 2.08285600  |
| C | 1.42194200  | -1.36832500 | -3.76681600 | C  | 3.68686900  | -0.27471500 | 1.23223600  |
| H | 0.88554700  | -1.13752700 | -2.83368100 | H  | 2.42003000  | -0.58753400 | 2.98500500  |
| H | 2.13853700  | -2.17428000 | -3.55308000 | H  | 2.91790700  | -2.11325000 | 2.05596200  |
| H | 0.68897500  | -1.76603500 | -4.48495800 | H  | 4.29830500  | -0.79364500 | 0.48961400  |
| C | 1.02899300  | 0.83625600  | -4.84158800 | H  | 3.97577400  | 1.62290700  | 0.25898300  |
| H | 0.51001600  | 0.37164800  | -5.69168100 | H  | 3.05031200  | 1.71205300  | 1.86731900  |
| H | 1.45454000  | 1.78330500  | -5.20337800 | Sb | -6.31227000 | -0.08765900 | -1.54914900 |
| H | 0.25227100  | 1.05637800  | -4.09932200 | F  | -6.70348100 | 1.74449200  | -1.78918200 |
| C | 2.88434700  | -0.53374500 | -5.61477700 | F  | -5.17362100 | 0.38513000  | -0.11717100 |
| H | 2.18357000  | -0.94111000 | -6.35635400 | F  | -5.79367300 | -1.88244300 | -1.32378500 |
| H | 3.64577100  | -1.30004700 | -5.43184800 | F  | -7.72551300 | -0.28028400 | -0.33040000 |
| H | 3.38207000  | 0.33836400  | -6.06141200 | F  | -7.45772300 | -0.54765500 | -2.96306800 |
| C | 0.65122300  | 2.49505500  | 6.13028100  | F  | -4.89769100 | 0.10669300  | -2.79838300 |

## 7bz

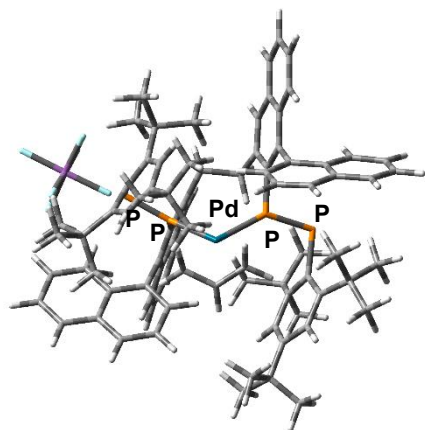

|    |             |             |             |   |             |             |             |
|----|-------------|-------------|-------------|---|-------------|-------------|-------------|
| Sb | 6.09901400  | -1.13876600 | -1.41321100 | C | -3.32053700 | 4.63343300  | 1.01681000  |
| F  | 5.09697000  | -2.73308200 | -1.47909700 | H | -5.17858800 | 4.00486100  | 1.86396700  |
| F  | 4.50354600  | -0.15891000 | -1.68072700 | H | -1.67382700 | 5.20443700  | -0.21922100 |
| F  | 6.34256500  | -1.17700800 | -3.27756000 | C | -1.99832100 | 3.92360300  | -2.46755800 |
| F  | 7.69094500  | -2.11348900 | -1.19868800 | C | -6.17859400 | 2.22379600  | 0.11967000  |
| F  | 7.03704100  | 0.49556300  | -1.29578800 | C | -1.42449200 | -1.46978800 | -3.18125100 |
| F  | 5.90448800  | -1.09744400 | 0.45923300  | H | -4.16584700 | -2.90587500 | 2.75610500  |
| C  | -3.64025700 | -6.02466800 | -2.99458100 | C | -3.04567400 | 5.63458500  | 2.13563500  |
| C  | -7.35343300 | -1.83951400 | -2.34518700 | H | -2.56662800 | -2.77970400 | 0.84850500  |
| C  | -3.04126500 | -3.71462100 | -2.55066000 | C | 1.71183900  | 0.53542300  | -2.53906600 |
| C  | -5.48968600 | -2.33067800 | -0.86901100 | C | 2.23275700  | 1.33746700  | -3.52351000 |
| C  | -4.09036800 | -2.48873500 | -0.62896700 | C | 1.79051500  | 0.97053000  | -1.17948500 |
| C  | -3.13949800 | -2.51953200 | -1.77489100 | C | 2.81047100  | 2.59351100  | -3.23600100 |
| C  | -4.54478200 | -2.75222300 | 1.74606200  | H | 2.18726000  | 1.00911000  | -4.56447700 |
| C  | -5.89570300 | -2.66369700 | 1.52777600  | C | 2.34459100  | 2.19900600  | -0.85538800 |
| C  | -6.39970300 | -2.44303000 | 0.22340400  | C | 2.85485600  | 3.04483000  | -1.88583800 |
| C  | -7.78661900 | -2.28214600 | -0.01309800 | C | 3.30372200  | 3.43299900  | -4.26483800 |
| C  | -8.25554600 | -1.97942400 | -1.26749900 | C | 2.40926900  | 2.67125900  | 0.55567000  |
| H  | -9.32225900 | -1.84285000 | -1.43529000 | P | 2.70457400  | -1.34861100 | 0.60677000  |
| H  | -8.47272900 | -2.38053700 | 0.82842600  | C | 3.38377600  | 4.33416900  | -1.61891300 |
| H  | -6.60033800 | -2.74268500 | 2.35560400  | C | 3.80874500  | 4.67552800  | -3.97467400 |
| C  | -2.76322100 | -6.04814700 | -4.10172200 | H | 3.26446600  | 3.07355100  | -5.29315100 |
| C  | -2.03593400 | -4.93126900 | -4.42785200 | C | 3.63429300  | 2.57570000  | 1.28599200  |
| C  | -2.14874200 | -3.74514000 | -3.66180900 | C | 1.30394100  | 3.24852000  | 1.14765900  |
| H  | -2.66449100 | -6.95706000 | -4.69221200 | C | 1.85812300  | -2.38118000 | 1.90185800  |
| H  | -1.35066500 | -4.93999000 | -5.27528800 | C | 3.84482800  | 5.13053900  | -2.63802400 |
| C  | -1.36499400 | -2.60602900 | -3.95018200 | H | 3.41392300  | 4.69320900  | -0.59123900 |
| H  | -0.67319000 | -2.64735800 | -4.79449600 | H | 4.17993500  | 5.31566000  | -4.77299300 |
| C  | -6.00509600 | -2.02399200 | -2.15383400 | C | 3.69347400  | 3.10912500  | 2.60933800  |
| H  | -5.31473600 | -1.92481800 | -2.99111000 | C | 4.78723300  | 1.94397600  | 0.75466800  |
| C  | -3.77920800 | -4.88606300 | -2.24051500 | C | 1.36056500  | 3.74571700  | 2.46980100  |
| H  | -4.45202800 | -4.87767300 | -1.38431800 | H | 0.36949900  | 3.32346500  | 0.58540700  |
| H  | -7.73140600 | -1.59061400 | -3.33510300 | C | 1.94444700  | -2.01906200 | 3.27533400  |
| H  | -4.20799200 | -6.91704100 | -2.73776600 | C | 0.96968600  | -3.41441500 | 1.51026600  |
| C  | -2.34637700 | -1.42694600 | -2.08888100 | H | 4.24201300  | 6.11949000  | -2.41651200 |
| C  | -3.63950900 | -2.67619300 | 0.66292400  | C | 2.53296200  | 3.68881700  | 3.17975200  |
| P  | -3.89809000 | 1.17437400  | -2.01124300 | C | 4.90575600  | 3.01870900  | 3.33597000  |
| C  | -3.85957700 | 2.73085600  | -1.00104800 | C | 5.94445800  | 1.86264800  | 1.49073600  |
| C  | -4.80308100 | 2.92622100  | 0.05447700  | H | 4.75377300  | 1.49010600  | -0.23430700 |
| C  | -2.80219500 | 3.65649400  | -1.17361300 | H | 0.46996900  | 4.18850000  | 2.91803700  |
| C  | -4.48592500 | 3.85914900  | 1.03918900  | C | 0.93012200  | -2.46239300 | 4.12504600  |
| C  | -2.52881500 | 4.54019700  | -0.11822600 | C | 3.09779700  | -1.22669800 | 3.92999500  |

|   |             |             |             |    |             |             |             |
|---|-------------|-------------|-------------|----|-------------|-------------|-------------|
| C | -0.01271700 | -3.81673900 | 2.42362500  | H  | -2.13378500 | 2.08447200  | -3.69438700 |
| C | 1.04213200  | -4.23876900 | 0.20550400  | C  | -2.22790000 | 5.40435500  | -2.83788500 |
| H | 2.58963600  | 4.08111700  | 4.19555600  | H  | -1.68064400 | 5.64076900  | -3.76089800 |
| C | 6.00993000  | 2.41147500  | 2.78928100  | H  | -1.88265800 | 6.10168300  | -2.06620900 |
| H | 4.93907600  | 3.43347100  | 4.34408200  | H  | -3.29464800 | 5.59936000  | -3.01690300 |
| H | 6.80093000  | 1.35122300  | 1.05669100  | C  | -2.15177900 | -4.74743400 | 4.11307900  |
| C | -0.10008500 | -3.30833700 | 3.71393900  | H  | -1.60917600 | -5.68958700 | 3.95175300  |
| H | 0.94034400  | -2.12741300 | 5.16077000  | H  | -2.61724300 | -4.45953100 | 3.15975700  |
| H | -0.72863100 | -4.56844000 | 2.10125600  | H  | -2.96164100 | -4.94620700 | 4.82799900  |
| H | 6.93485500  | 2.34431900  | 3.35982600  | C  | -0.68453100 | -4.15383000 | 6.01020500  |
| C | -1.23703400 | -3.65726500 | 4.66927900  | H  | -0.08187800 | -3.39422100 | 6.52393900  |
| C | 0.96769500  | -0.70941700 | -2.93036200 | H  | -0.05845300 | -5.04557200 | 5.86902200  |
| H | 1.50895900  | -1.25855600 | -3.71405300 | H  | -1.51327500 | -4.42336700 | 6.68000200  |
| H | 0.87803000  | -1.40058000 | -2.08102900 | C  | -2.07106400 | -2.39033100 | 4.90197800  |
| P | 1.14505800  | -0.09718600 | 0.16928500  | H  | -2.45445500 | -1.99503400 | 3.94708100  |
| P | -2.44975700 | 0.08928000  | -1.05933100 | H  | -1.48095100 | -1.59524200 | 5.37968800  |
| C | -0.45081300 | -0.35425100 | -3.43085400 | H  | -2.93299800 | -2.60699800 | 5.54989900  |
| H | -0.77329100 | 0.56185700  | -2.91605300 | C  | 3.48740800  | -1.91583000 | 5.25104800  |
| H | -0.41031600 | -0.09994800 | -4.50021800 | H  | 3.74039800  | -2.97228000 | 5.08584400  |
| C | -6.08251100 | 0.80656200  | 0.69084300  | H  | 2.70126400  | -1.86941200 | 6.01378600  |
| H | -5.76393000 | 0.82127600  | 1.74378300  | H  | 4.37057300  | -1.41746400 | 5.67315800  |
| H | -5.38616500 | 0.16754100  | 0.13186400  | C  | 4.37405300  | -1.18726100 | 3.09134100  |
| H | -7.06994100 | 0.32369100  | 0.64947400  | H  | 5.19570400  | -0.78113900 | 3.69925000  |
| C | -6.83073400 | 2.17561700  | -1.27054400 | H  | 4.31090800  | -0.52843900 | 2.21575000  |
| H | -7.86723500 | 1.82285000  | -1.17829400 | H  | 4.67470800  | -2.18612900 | 2.74537500  |
| H | -6.33375100 | 1.48179900  | -1.96223100 | C  | 2.67854300  | 0.21234700  | 4.23450100  |
| H | -6.84720200 | 3.17099800  | -1.73517700 | H  | 1.78287300  | 0.25269000  | 4.87156100  |
| C | -7.15743700 | 2.99836200  | 1.01320300  | H  | 2.47949500  | 0.76781200  | 3.30662400  |
| H | -7.25704600 | 4.04689100  | 0.70013800  | H  | 3.49014500  | 0.73946200  | 4.75813300  |
| H | -6.87234500 | 2.97742500  | 2.07285900  | C  | 2.26012200  | -3.97024800 | -0.67896900 |
| H | -8.14799900 | 2.53010300  | 0.94309000  | H  | 2.31788800  | -4.75159400 | -1.45032300 |
| C | -4.18801200 | 6.65956000  | 2.17373100  | H  | 3.20502400  | -4.00080300 | -0.11961200 |
| H | -3.98963900 | 7.41858000  | 2.94376600  | H  | 2.21781200  | -3.01753700 | -1.22170700 |
| H | -5.15421000 | 6.19305900  | 2.40645100  | C  | -0.22361100 | -4.04300300 | -0.63223800 |
| H | -4.28440100 | 7.17200300  | 1.20646100  | H  | -0.35501900 | -2.98734500 | -0.91514500 |
| C | -2.96686300 | 4.91748600  | 3.48755700  | H  | -1.13029700 | -4.36004400 | -0.09641200 |
| H | -2.07033600 | 4.28302200  | 3.54554800  | H  | -0.16965000 | -4.63473800 | -1.55925700 |
| H | -3.84343200 | 4.28468200  | 3.68029100  | C  | 1.15564800  | -5.72366300 | 0.60464900  |
| H | -2.89837400 | 5.65308000  | 4.30134600  | H  | 1.21463500  | -6.34391000 | -0.30045700 |
| C | -1.73703300 | 6.39377400  | 1.92551600  | H  | 0.29977700  | -6.08000500 | 1.18946700  |
| H | -1.76621100 | 7.02323200  | 1.02521600  | H  | 2.06569300  | -5.89875300 | 1.19534400  |
| H | -0.87695500 | 5.71292300  | 1.83684300  | Pd | -1.09133300 | 0.33332000  | 0.86142600  |
| H | -1.55184000 | 7.05329300  | 2.78391500  | C  | -2.83454200 | 0.74304900  | 2.18259600  |
| C | -0.50263400 | 3.69086500  | -2.24704000 | C  | -0.53991800 | 0.59891000  | 2.97812700  |
| H | -0.29457100 | 2.64541300  | -1.97312900 | C  | -1.69350700 | 1.35613200  | 2.71556600  |
| H | -0.09413400 | 4.33388100  | -1.45470700 | H  | -0.59960200 | -0.44628100 | 3.29935100  |
| H | 0.05882200  | 3.91343800  | -3.16709200 | H  | 0.38923900  | 1.11919200  | 3.20251900  |
| C | -2.43045200 | 3.14008800  | -3.70916300 | H  | -1.61021100 | 2.44351800  | 2.63785500  |
| H | -1.93779600 | 3.58027300  | -4.58756300 | H  | -3.64310200 | 1.36762600  | 1.80760400  |
| H | -3.51408600 | 3.20412100  | -3.88379300 | H  | -3.08512000 | -0.29651300 | 2.41314600  |

8A

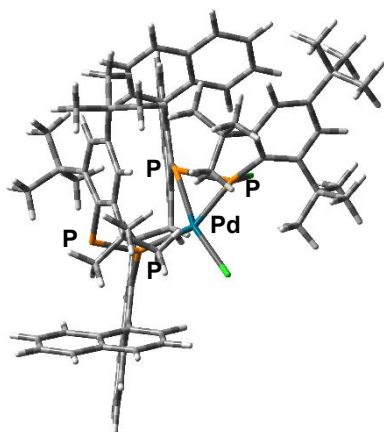

|   |                 |                 |                 |   |                 |                 |                 |
|---|-----------------|-----------------|-----------------|---|-----------------|-----------------|-----------------|
| C | -3.862904287860 | -3.328459837865 | 5.653453294444  | C | -7.289711200141 | 0.125375277664  | -3.000514860502 |
| C | -5.903816941903 | -0.963209678112 | 0.816470672004  | H | -1.450185540450 | 0.665857545050  | 4.193782924159  |
| C | -2.479425103806 | -2.517190704503 | 3.830937921497  | C | 4.269145416522  | -3.726107583237 | 1.329741785709  |
| C | -4.138238353398 | -0.099084872387 | 2.239919909687  | C | 3.809981606170  | -1.608415222085 | 0.263862189626  |
| C | -2.880923914768 | -0.240074096784 | 2.899176084589  | C | 5.490424165159  | -3.835376045089 | 0.627213281397  |
| C | -2.121048649932 | -1.525514962471 | 2.867175837987  | H | 3.996671289550  | -4.518839337722 | 2.030173490698  |
| C | -3.100090132490 | 2.015146756289  | 3.785568716939  | C | 5.001974899506  | -1.674157145302 | -0.444188583874 |
| C | -4.312516685930 | 2.171238716881  | 3.160640695210  | C | 5.870070023957  | -2.796154212016 | -0.269955147711 |
| C | -4.860906378700 | 1.123136242709  | 2.382900631464  | C | 6.345189549935  | -4.950795066685 | 0.800200030262  |
| C | -6.112388308227 | 1.261213752349  | 1.732882496547  | C | 7.097551074997  | -2.921757025652 | -0.969924062214 |
| C | -6.624937186763 | 0.241184856080  | 0.971074496182  | C | 7.528857354366  | -5.040957185166 | 0.111538069601  |
| H | -7.596843756588 | 0.354902101048  | 0.491275298813  | H | 6.041149019620  | -5.736842869069 | 1.491501570326  |
| H | -6.662003772815 | 2.195086958113  | 1.854365945724  | C | 7.906125920004  | -4.015811597366 | -0.782977866585 |
| H | -4.871433478435 | 3.103134955157  | 3.253527609256  | H | 7.394196297328  | -2.138543022898 | -1.665307272970 |
| C | -3.135012513872 | -4.538137878307 | 5.679466555161  | H | 8.178653611347  | -5.903039334093 | 0.250666179373  |
| C | -2.097076032694 | -4.734656133991 | 4.803098057025  | H | 8.844317369282  | -4.095392644769 | -1.329066837319 |
| C | -1.747197085275 | -3.734978927041 | 3.864583944871  | C | 5.387386874949  | -0.620290964477 | -1.424003650133 |
| H | -3.398679844991 | -5.311885862505 | 6.398198756614  | C | 6.325772698365  | 0.400983568324  | -1.085381417924 |
| H | -1.523532140196 | -5.661455681685 | 4.815828426990  | C | 4.860616353538  | -0.668627242155 | -2.696040139253 |
| C | -0.668321511704 | -3.903514182585 | 2.970567414041  | C | 6.695266315400  | 1.353459067849  | -2.081949742650 |
| H | -0.087694989736 | -4.826500334550 | 3.033513705035  | C | 6.891354923162  | 0.519992777683  | 0.209261588097  |
| C | -4.694416519257 | -1.131178687240 | 1.443576156664  | C | 5.217397425702  | 0.284801992349  | -3.673728825336 |
| H | -4.146764128720 | -2.066448270419 | 1.334613062741  | H | 4.138403826801  | -1.445657332965 | -2.944619627837 |
| C | -3.542956633516 | -2.341148333771 | 4.753842149013  | C | 7.611422228005  | 2.380262660813  | -1.747852085572 |
| H | -4.109149689831 | -1.411482306062 | 4.744439013664  | C | 6.121704293407  | 1.270878708692  | -3.375289069217 |
| H | -6.309448553493 | -1.765209226866 | 0.199899568406  | C | 7.770353738101  | 1.534095175311  | 0.505065208989  |
| H | -4.683127548892 | -3.178136724285 | 6.352964105477  | H | 6.613310531977  | -0.202854481327 | 0.976112948053  |
| C | -1.081952670880 | -1.744027597829 | 1.962973859208  | H | 4.767438015615  | 0.225450867927  | -4.663780664293 |
| C | -2.394989757985 | 0.800325441268  | 3.664203413217  | C | 8.135629373953  | 2.474541227440  | -0.482342010549 |
| C | -3.099138304928 | -0.583199616098 | -2.115154218507 | H | 7.883395055508  | 3.103458543662  | -2.517495515679 |
| C | -3.628401389164 | 0.724706113970  | -1.929022522380 | H | 6.409077634143  | 2.012062988653  | -4.121856877856 |
| C | -3.824229477139 | -1.519656357549 | -2.913868837099 | H | 8.190288834587  | 1.612894489970  | 1.506309632430  |
| C | -4.988368103712 | 0.909186288734  | -2.185775015699 | H | 8.833704097762  | 3.272805079025  | -0.236575229118 |
| C | -5.178392091662 | -1.258519268426 | -3.114711063005 | P | 2.614406995575  | -0.235700676127 | 0.006901720714  |
| C | -5.808537458579 | -0.086109995982 | -2.705201759895 | P | 3.406041451120  | 1.341248917978  | 1.031039424433  |
| H | -5.415155667430 | 1.887052331269  | -1.983693113741 | C | 2.081248715294  | 2.647472728940  | 0.989203107005  |
| H | -5.757968485936 | -1.985892488727 | -3.681104312080 | C | 1.852066095840  | 3.486069050055  | -0.140434548677 |
| C | -3.243031664907 | -2.652656485011 | -3.798118385758 | C | 1.333566314635  | 2.855250900799  | 2.192021152053  |
| C | -2.812124861865 | 1.990499141209  | -1.605265294319 | C | 0.788494245723  | 4.394320057105  | -0.073699634110 |
| C | -0.312469743845 | -2.955200170745 | 2.041917583252  | C | 0.277581111010  | 3.768348448631  | 2.153406694202  |
| H | -2.686557138490 | 2.820695316282  | 4.392309263206  | C | -0.022898415684 | 4.551757639975  | 1.043354619768  |



|    |                 |                 |                 |   |                 |                 |                 |
|----|-----------------|-----------------|-----------------|---|-----------------|-----------------|-----------------|
| H  | 0.607758180566  | 5.043454007422  | -0.923158599768 | C | 1.598678853847  | 0.734976113607  | 3.653414544501  |
| H  | -0.313334136286 | 3.920209767599  | 3.048156181599  | H | 0.664991339960  | 0.368992204084  | 3.197419720572  |
| C  | 2.747210889016  | 3.556407941190  | -1.403965192433 | H | 2.436626838298  | 0.233677950623  | 3.157045671277  |
| C  | -1.041568119953 | 5.689890863609  | 1.137528244904  | H | 1.609992822799  | 0.409463047022  | 4.703258226246  |
| C  | 1.694383163864  | 2.265409168567  | 3.581982656122  | C | 0.774902108086  | 2.793561506770  | 4.692707815790  |
| C  | 3.430685051971  | -2.650390405944 | 1.171154611208  | H | 1.107328130243  | 2.373866436705  | 5.650719179387  |
| C  | 2.148863878009  | -2.588676366231 | 1.955215499828  | H | 0.811551035425  | 3.886823897666  | 4.785539503203  |
| H  | 1.903630792214  | -1.546971340066 | 2.207393942911  | H | -0.271800319172 | 2.491487679464  | 4.549993920130  |
| H  | 2.284244756898  | -3.103533296502 | 2.918264361491  | C | -1.333617235653 | 1.845769598134  | -1.973854632845 |
| C  | 0.938035084044  | -3.220718617567 | 1.248901258999  | H | -0.841381738136 | 2.827369748668  | -1.899751447767 |
| H  | 1.101507487871  | -4.305373957969 | 1.169496223400  | H | -0.761393362539 | 1.193703627507  | -1.303455769622 |
| H  | 0.860539982675  | -2.847851930101 | 0.215138851478  | H | -1.203121411438 | 1.472124862439  | -3.001233642838 |
| P  | -0.870848524557 | -0.337728165586 | 0.758886285981  | C | -2.969550207306 | 2.389219407014  | -0.135443025178 |
| Pd | 0.609669163690  | -0.891787938064 | -1.049960271788 | H | -2.218844589507 | 3.145692075259  | 0.138677862449  |
| Cl | 1.479827917266  | -1.393907871252 | -3.270605401821 | H | -3.970080589984 | 2.805314673315  | 0.055814570574  |
| P  | -1.701776212299 | -1.241501307588 | -1.086362023184 | H | -2.833679892571 | 1.537158008445  | 0.540074258914  |
| Cl | -2.446362332475 | -3.105927374055 | -0.522929851857 | C | -3.313680197590 | 3.149768522336  | -2.489188186232 |
| C  | 4.236184933741  | 3.565170238167  | -1.034002657712 | H | -4.316782445772 | 3.500794710124  | -2.221252294713 |
| H  | 4.604622685541  | 2.613386618703  | -0.627718022497 | H | -2.636462982289 | 4.006915082627  | -2.375685998560 |
| H  | 4.837794346821  | 3.753540363259  | -1.934661822354 | H | -3.318566081098 | 2.867455303181  | -3.550998329928 |
| H  | 4.455753395049  | 4.356489022009  | -0.302746771155 | C | -7.806853630693 | 1.460863307125  | -2.468188670425 |
| C  | 2.447328040049  | 2.419934977665  | -2.388902732164 | H | -7.643333244541 | 1.566018600643  | -1.386444622211 |
| H  | 2.692261989309  | 1.429782914506  | -1.992384494204 | H | -7.329765607512 | 2.314070607330  | -2.970094176289 |
| H  | 1.383255649689  | 2.415735159934  | -2.669493084576 | H | -8.886994042612 | 1.534779547187  | -2.652910077079 |
| H  | 3.040409154132  | 2.556717945630  | -3.305944347374 | C | -7.493899347409 | 0.114662572684  | -4.522430912631 |
| C  | 2.521296480678  | 4.861705614249  | -2.185169314260 | H | -6.893956706403 | 0.900737983326  | -5.001850116210 |
| H  | 2.653519271542  | 5.753088642556  | -1.556331181000 | H | -7.212531161460 | -0.847224756430 | -4.971603643727 |
| H  | 3.256761781618  | 4.913574422684  | -2.998334834744 | H | -8.551150214698 | 0.298374468569  | -4.761483906032 |
| H  | 1.529740369469  | 4.907933767701  | -2.655177699479 | C | -8.117331569302 | -1.002219284943 | -2.374672378017 |
| C  | -2.138676077409 | 5.409503801719  | 2.169291739619  | H | -9.177325651698 | -0.880510221140 | -2.638420142625 |
| H  | -1.750279083970 | 5.380976581754  | 3.196424093902  | H | -7.799164996193 | -1.993260524720 | -2.723653122948 |
| H  | -2.886344720216 | 6.213665824974  | 2.134231511647  | H | -8.042029195953 | -0.991731781752 | -1.278291620856 |
| H  | -2.655107660136 | 4.457791765137  | 1.974430986777  | C | -3.916688673382 | -4.005020702728 | -3.548266977187 |
| C  | -1.720970273682 | 5.994586597458  | -0.199568931882 | H | -3.527375995731 | -4.742890147378 | -4.263767936064 |
| H  | -1.008011336651 | 6.260272953613  | -0.990548363621 | H | -3.715352376083 | -4.378128002503 | -2.537237495277 |
| H  | -2.324584718589 | 5.147016515424  | -0.550520098070 | H | -5.004892971599 | -3.961727262360 | -3.684164746995 |
| H  | -2.396690685401 | 6.852188384700  | -0.076803828220 | C | -3.541332682017 | -2.217694048019 | -5.251615352858 |
| C  | -0.268519856768 | 6.941955104790  | 1.580743046695  | H | -3.130635846308 | -2.963210593594 | -5.946574533735 |
| H  | -0.953982946099 | 7.794828667983  | 1.692014749925  | H | -4.613609113469 | -2.124267989596 | -5.460684998851 |
| H  | 0.230710373472  | 6.775533299483  | 2.545628295072  | H | -3.067692913019 | -1.250616720423 | -5.471766496577 |
| H  | 0.499832810674  | 7.214472150688  | 0.843532815520  | C | -1.725292747283 | -2.829168114295 | -3.754421518351 |
| C  | 3.107592967694  | 2.724801487880  | 3.975616410264  | H | -1.186557415360 | -1.880642859045 | -3.883419030019 |
| H  | 3.887603185371  | 2.358276923959  | 3.296623968101  | H | -1.354438069958 | -3.315500462994 | -2.846304592349 |
| H  | 3.163921835776  | 3.821934691710  | 3.994255138054  | H | -1.428210683599 | -3.479722596124 | -4.588817768327 |
| H  | 3.352630215189  | 2.353061895097  | 4.980686470939  |   |                 |                 |                 |

8B

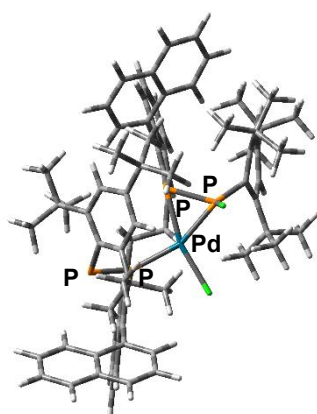

|   |                 |                 |                |   |                 |                 |                 |
|---|-----------------|-----------------|----------------|---|-----------------|-----------------|-----------------|
| C | -5.175560991522 | -1.535633700165 | 4.719482889266 | C | 6.582359697734  | -5.341835428008 | 0.865979639534  |
| C | -6.840990570336 | 1.409385011424  | 1.196883174989 | H | 6.857488473905  | -3.538116035869 | -0.244495251872 |
| C | -3.548134359012 | -1.037886713368 | 2.978244688966 | H | 6.050001028989  | -7.070031891435 | 2.063975369575  |
| C | -4.551586492251 | 1.788347461200  | 1.918100023910 | H | 7.551467149519  | -5.746537996917 | 0.580023802549  |
| C | -3.237621418348 | 1.313352675640  | 2.225934076867 | C | 5.401937693096  | -1.523533868663 | -0.617344422195 |
| C | -2.866524157387 | -0.129455493168 | 2.096348246200 | C | 6.500306724163  | -0.755546526516 | -0.125709753800 |
| C | -2.680859319695 | 3.517947952231  | 3.105746826998 | C | 5.204854116186  | -1.636690975492 | -1.976436467108 |
| C | -3.922947252724 | 3.999511004435  | 2.783188257356 | C | 7.364058237225  | -0.110088871643 | -1.061191629919 |
| C | -4.885638444686 | 3.149280797383  | 2.192781222440 | C | 6.755566318853  | -0.588167144946 | 1.258689401905  |
| C | -6.196500892523 | 3.613878543526  | 1.916909349813 | C | 6.061460934910  | -0.996389210301 | -2.898478097335 |
| C | -7.160376206467 | 2.763360191143  | 1.439694126703 | H | 4.361217473199  | -2.219748643017 | -2.343529444999 |
| H | -8.170112997127 | 3.124193710578  | 1.253730723095 | C | 8.430094335383  | 0.687895558909  | -0.578685931467 |
| H | -6.427573933293 | 4.660011611283  | 2.117887115000 | C | 7.124221100267  | -0.255809004156 | -2.450025764569 |
| H | -4.194787338068 | 5.032987675476  | 2.997640251350 | C | 7.797666211781  | 0.193335694592  | 1.695540879738  |
| C | -4.908984166985 | -2.916520237798 | 4.599953815270 | H | 6.104031367461  | -1.081991981302 | 1.979623857429  |
| C | -3.951187324022 | -3.348795537010 | 3.718395763833 | H | 5.869599596995  | -1.100799479525 | -3.965204117775 |
| C | -3.243414212317 | -2.424080020839 | 2.912110323984 | C | 8.642267267163  | 0.842417770334  | 0.768835875453  |
| H | -5.447301958880 | -3.629568895503 | 5.221450151215 | H | 9.076359963202  | 1.183618505600  | -1.303689359622 |
| H | -3.701417069626 | -4.407021194866 | 3.636355345323 | H | 7.793393900859  | 0.244466765515  | -3.150657193982 |
| C | -2.156959653065 | -2.834141581542 | 2.114461582172 | H | 7.974102877395  | 0.314838287427  | 2.762874640369  |
| H | -1.849155622321 | -3.880957103569 | 2.168202058874 | H | 9.461819377832  | 1.462976913086  | 1.126868547038  |
| C | -5.566394664373 | 0.943764386312  | 1.404088646490 | P | 2.606034427192  | -0.164540241197 | -0.16469496077  |
| H | -5.320188222547 | -0.092704228785 | 1.182622254209 | P | 3.751444632062  | 1.272053079549  | 1.009153845264  |
| C | -4.512926824132 | -0.622573211667 | 3.935707368367 | C | 2.734861002124  | 2.746298326597  | 0.523953474481  |
| H | -4.729278779464 | 0.435658000029  | 4.057241780383 | C | 2.709698865422  | 3.236782719359  | -0.800395529115 |
| H | -7.614416675857 | 0.732855237832  | 0.832332769843 | C | 1.833409195609  | 3.275615244298  | 1.498906257978  |
| H | -5.908954415788 | -1.188884664662 | 5.445048219970 | C | 1.611623950604  | 4.022178484832  | -1.184860105552 |
| C | -1.836905709479 | -0.584014248536 | 1.258707652484 | C | 0.807686848686  | 4.101244120987  | 1.047468713004  |
| C | -2.343534204461 | 2.178722045376  | 2.827223495472 | C | 0.628693280926  | 4.434560389413  | -0.299916052192 |
| C | -1.405963417289 | -1.956767154424 | 1.369785118120 | H | 1.542562887895  | 4.329530123013  | -2.225545110160 |
| H | -1.956240859627 | 4.169286811552  | 3.593020181893 | H | 0.098264303020  | 4.502938439756  | 1.765968176867  |
| H | -1.363144796957 | 1.803000270681  | 3.124076176797 | C | 3.824109325389  | 3.095315312703  | -1.858661702926 |
| C | 2.819825250445  | -3.794747482539 | 1.963210751482 | C | -0.543155599465 | 5.316897565095  | -0.723058813893 |
| C | 3.258179427600  | -1.787927939933 | 0.688800639313 | C | 1.988780049232  | 3.044809230791  | 3.020510530378  |
| C | 4.080676608814  | -4.321535162778 | 1.606515232870 | C | 2.392118164574  | -2.565154503247 | 1.527751967010  |
| H | 2.172310921477  | -4.387470279570 | 2.61324561278  | C | 1.020545752357  | -2.092799363859 | 1.931672484748  |
| C | 4.503369367201  | -2.273584291382 | 0.306294225340 | H | 1.004908719086  | -1.002222050290 | 2.084618668985  |
| C | 4.937752129382  | -3.556828123932 | 0.765011594859 | H | 0.756208991287  | -2.536270406726 | 2.903223570947  |
| C | 4.506006658527  | -5.590994366940 | 2.066381339505 | C | -0.071029643860 | -2.483318922022 | 0.918819251988  |
| C | 6.195752357577  | -4.106916609514 | 0.406136818889 | H | -0.110209744924 | -3.581078053526 | 0.859029783273  |
| C | 5.731509327133  | -6.092621452339 | 1.706156947822 | H | 0.213378492010  | -2.138652100455 | -0.083431509335 |
| H | 3.837449717055  | -6.161409499692 | 2.711268277613 | P | -1.050313910248 | 0.718951539442  | 0.143463296122  |

|    |                 |                 |                 |   |                 |                |                 |
|----|-----------------|-----------------|-----------------|---|-----------------|----------------|-----------------|
| Pd | 0.681603905599  | -0.305927908321 | -1.225669135974 | H | -6.725550492394 | 1.223408780317 | -1.294251492371 |
| Cl | 1.925327819034  | -1.224791365499 | -3.123252497854 | H | -6.646842807652 | 2.101658822860 | -2.823158227258 |
| P  | -1.521620970348 | 0.026256523125  | -1.888876595841 | H | -6.883509669092 | 0.345650212443 | -2.841509950750 |
| Cl | -1.181996284209 | 1.660695377510  | -3.169175467089 | C | -4.242869554494 | 2.228133916013 | -1.682783713309 |
| C  | -3.069199754236 | -0.886360101177 | -2.155383440726 | H | -4.582618819989 | 2.265009251614 | -0.639569480224 |
| C  | -4.365410359516 | -0.346487746710 | -1.866773056626 | H | -3.150408216573 | 2.247993134887 | -1.678064089992 |
| C  | -2.887417788461 | -2.294099926005 | -2.199950667918 | H | -4.577484082448 | 3.150506029104 | -2.180057159237 |
| C  | -5.272534172081 | -1.206244846088 | -1.264198076130 | C | 3.337487739370  | 2.273927011930 | -3.056458148235 |
| C  | -3.817048971299 | -3.072066930512 | -1.497681782029 | H | 3.070777716993  | 1.249945261797 | -2.758431923334 |
| C  | -4.971477453354 | -2.539962271275 | -0.942628414485 | H | 2.455105667602  | 2.724292014000 | -3.533034843787 |
| H  | -6.267802662820 | -0.833826071762 | -1.035236883135 | H | 4.131553689007  | 2.211170157331 | -3.816089370157 |
| H  | -3.637602715898 | -4.142272220412 | -1.425433223065 | C | 5.132102497795  | 2.482226969950 | -1.358040984457 |
| C  | -4.838991629564 | 1.017156100621  | -2.408386175345 | H | 5.071971740851  | 1.399875945597 | -1.202364008503 |
| C  | -1.891414556960 | -3.028415630810 | -3.120893735450 | H | 5.909903862334  | 2.630591652695 | -2.121912392523 |
| C  | -5.970182262472 | -3.395748499321 | -0.172156767805 | H | 5.494837970790  | 2.957287131241 | -0.433212359613 |
| C  | -2.690009038621 | -4.118369146324 | -3.865601098682 | C | 4.197860140119  | 4.513241824855 | -2.334050696622 |
| H  | -3.026507582704 | -4.930150774917 | -3.210347131551 | H | 4.555150567317  | 5.125172133496 | -1.493588565259 |
| H  | -3.569624969076 | -3.695587274281 | -4.370205482243 | H | 5.007317973025  | 4.448732543123 | -3.074361051650 |
| H  | -2.043147621066 | -4.568425377393 | -4.630842569706 | H | 3.365035538245  | 5.044670018178 | -2.808191054862 |
| C  | -0.758995162863 | -3.714531800432 | -2.357424246387 | C | 3.418959133872  | 3.386284273494 | 3.464022636567  |
| H  | -0.188097358915 | -4.359396323281 | -3.041264298127 | H | 4.183968037101  | 2.751907113444 | 2.999040988059  |
| H  | -0.057278657113 | -2.985690782211 | -1.935544833248 | H | 3.657754984567  | 4.431746140788 | 3.224806253890  |
| H  | -1.150313262384 | -4.344101017808 | -1.545010757953 | H | 3.511938978893  | 3.255037083959 | 4.551367868930  |
| C  | -1.333204716264 | -2.117469831076 | -4.218724924321 | C | 1.626507849869  | 1.613701342006 | 3.453069795911  |
| H  | -0.630572115242 | -1.361882207034 | -3.851985493609 | H | 0.695008359296  | 1.279237301475 | 2.969310567124  |
| H  | -0.767709470521 | -2.728928842533 | -4.935636656392 | H | 2.403104752492  | 0.877994143171 | 3.212422048858  |
| H  | -2.147017162477 | -1.618792384205 | -4.765914272198 | H | 1.475528051165  | 1.580839786833 | 4.541487557541  |
| C  | -7.120982570482 | -3.768860499630 | -1.115489021324 | C | 1.077936781549  | 3.976901591066 | 3.827353288214  |
| H  | -6.749739003578 | -4.336387294855 | -1.980378405172 | H | 1.306827136180  | 3.861858331163 | 4.894693148258  |
| H  | -7.856458787758 | -4.392308197970 | -0.586981642201 | H | 1.224679707831  | 5.033190391976 | 3.565381072023  |
| H  | -7.640982761201 | -2.877363072382 | -1.491976852648 | H | 0.016600352891  | 3.729545290948 | 3.697954846432  |
| C  | -5.328635102900 | -4.680183016337 | 0.354284357660  | C | -0.697423576926 | 5.395470072788 | -2.240918342613 |
| H  | -5.041120516755 | -5.366027758737 | -0.453702683169 | H | -1.575045926621 | 6.00899896933  | -2.486297241384 |
| H  | -4.435641668892 | -4.462529853836 | 0.958395595740  | H | 0.170799316240  | 5.862987080739 | -2.725253981364 |
| H  | -6.046237525465 | -5.214481257114 | 0.991520348624  | H | -0.849076020577 | 4.400786880150 | -2.685151971169 |
| C  | -6.527686491046 | -2.623939006657 | 1.028524786250  | C | -0.305502822473 | 6.736023494950 | -0.190444424135 |
| H  | -5.720984049936 | -2.309527690525 | 1.706522424418  | H | 0.617387846757  | 7.161464059552 | -0.609627598466 |
| H  | -7.097414785096 | -1.734047139678 | 0.729141607853  | H | -1.142086507255 | 7.392765729578 | -0.470456558206 |
| H  | -7.211487162386 | -3.268254955930 | 1.598878308991  | H | -0.217719364909 | 6.750051737270 | 0.904499039635  |
| C  | -4.508417021970 | 1.050450989694  | -3.911122752107 | C | -1.850341511286 | 4.772020869272 | -0.140070668429 |
| H  | -4.860635031491 | 1.995917356741  | -4.347461025988 | H | -2.002835914914 | 3.719788841519 | -0.425364769109 |
| H  | -3.438929923958 | 0.962025406073  | -4.122341448393 | H | -1.869470191580 | 4.822646804446 | 0.955205243960  |
| H  | -5.020212765943 | 0.226353895052  | -4.428821855934 | H | -2.706518567535 | 5.355574084910 | -0.510193738657 |
| C  | -6.362073852480 | 1.164167856572  | -2.326803057493 |   |                 |                |                 |

8c

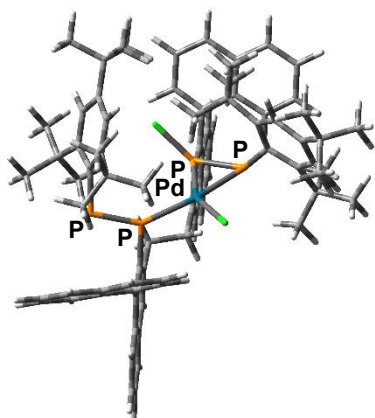

|   |                 |                 |                 |   |                 |                 |                 |
|---|-----------------|-----------------|-----------------|---|-----------------|-----------------|-----------------|
| C | -5.140765483766 | -6.317527255737 | -0.818410164615 | C | -2.574186870484 | 6.496237253715  | -2.188654646899 |
| C | -6.244836031424 | -0.475999087238 | -1.502462428540 | H | -3.237058820861 | -3.562920067100 | 2.414503798395  |
| C | -3.550149509785 | -4.486389872878 | -0.708231394150 | C | 3.398187309147  | -3.498378857360 | -2.591432048046 |
| C | -5.078471647372 | -1.649434578222 | 0.274040639667  | C | 3.249090844759  | -1.485383503360 | -1.264856756318 |
| C | -4.061875389893 | -2.535009304063 | 0.738207312022  | C | 4.615808344593  | -3.060171594647 | -3.157250205990 |
| C | -3.138753552997 | -3.209063556977 | -0.219264165241 | H | 2.999444370456  | -4.468169339867 | -2.898550516312 |
| C | -4.874339569663 | -2.277158173432 | 3.014246947210  | C | 4.443993899298  | -1.018714333650 | -1.795486705318 |
| C | -5.836905025136 | -1.392471252488 | 2.596086175982  | C | 5.148505642049  | -1.799042796990 | -2.764234288930 |
| C | -5.971446466853 | -1.068694369101 | 1.225273698327  | C | 5.310756649336  | -3.842493514967 | -4.111285968501 |
| C | -6.982092914150 | -0.183643488497 | 0.774265142504  | C | 6.358250424892  | -1.361242907127 | -3.362283136378 |
| C | -7.116785393447 | 0.111095669831  | -0.558843032084 | C | 6.483274329923  | -3.394444255633 | -4.665730239301 |
| H | -7.898584739287 | 0.789489982390  | -0.895047025661 | H | 4.890747454986  | -4.806471800853 | -4.398787712002 |
| H | -7.654143028747 | 0.255163447827  | 1.512103417313  | C | 7.008500822256  | -2.139074477989 | -4.288601755271 |
| H | -6.521757428259 | -0.935501499898 | 3.310593775928  | H | 6.768153187093  | -0.392634139162 | -3.081707347348 |
| C | -4.305814003904 | -7.001310375390 | -1.729962686624 | H | 7.009216869199  | -4.001920384003 | -5.400021804548 |
| C | -3.121165680216 | -6.438762590869 | -2.131484657057 | H | 7.934729444974  | -1.785350644557 | -4.737814594944 |
| C | -2.720625474050 | -5.174267114304 | -1.636352718891 | C | 4.993007376509  | 0.308416294311  | -1.402626853447 |
| H | -4.608303578761 | -7.973494336410 | -2.114484735566 | C | 6.103382112776  | 0.415605080467  | -0.510672449256 |
| H | -2.469652934376 | -6.951785038394 | -2.838472378069 | C | 4.432583625657  | 1.450346519047  | -1.933056844640 |
| C | -1.519367770313 | -4.568395657401 | -2.053293685231 | C | 6.622135198594  | 1.710558309509  | -0.208389638972 |
| H | -0.895273509976 | -5.101357031901 | -2.773356385894 | C | 6.691339814807  | -0.712659194281 | -0.115044185906 |
| C | -5.251874625665 | -1.335022696887 | -1.097749967572 | C | 4.937769958103  | 2.729905210484  | -1.616466361315 |
| H | -4.592193775879 | -1.795335187196 | -1.834422851816 | H | 3.572167668217  | 1.366272662988  | -2.596791108370 |
| C | -4.774923036503 | -5.092255757646 | -0.319972926310 | C | 7.709684621444  | 1.824938438243  | 0.691103244672  |
| H | -5.426698636582 | -4.576531624612 | 0.381877515966  | C | 6.017892309607  | 2.856818036459  | -0.781888158308 |
| H | -6.370775151976 | -0.255099280434 | -2.561076324287 | C | 7.735894813627  | -0.567239657885 | 0.996177853576  |
| H | -6.082421327274 | -6.767222899073 | -0.509610586558 | H | 6.296720709120  | -1.704374817741 | -0.104610566371 |
| C | -1.929195626263 | -2.653812417616 | -0.643141250417 | H | 4.460155340538  | 3.610409451491  | -2.043918915237 |
| C | -3.998514205069 | -2.859067209847 | 2.076704535438  | C | 8.254173715733  | 0.713442978502  | 1.285708179395  |
| P | -2.130659875166 | 0.409248449521  | -1.584802050528 | H | 8.096876425269  | 2.819893296194  | 0.913288498944  |
| C | -2.635155999729 | 2.192432672414  | -1.520732001134 | H | 6.421111066797  | 3.839078071813  | -0.533694699180 |
| C | -2.739626477718 | 2.721007275899  | -2.858547530954 | H | 8.168966088684  | -1.444781003383 | 1.473073519913  |
| C | -2.722345669765 | 3.074216698283  | -0.409257963058 | H | 9.084201928144  | 0.815960429808  | 1.982470370145  |
| C | -2.710694666057 | 4.107790599090  | -2.993857359907 | P | 2.299401063224  | -0.493165375944 | -0.032734495055 |
| C | -2.716574919458 | 4.450232974761  | -0.653119065933 | P | 3.308833228187  | -0.949675603522 | 1.688054959873  |
| C | -2.654010704275 | 4.996837887971  | -1.925208619410 | C | 2.242954887255  | -0.226634862681 | 3.024213428859  |
| H | -2.735897862708 | 4.532828452733  | -3.990705263343 | C | 2.126947146582  | 1.169772906814  | 3.244872525395  |
| H | -2.752438908709 | 5.122146771076  | 0.196398324073  | C | 1.480031767157  | -1.139957116419 | 3.820094662943  |
| C | -2.803669928662 | 2.643520327510  | 1.064754275520  | C | 1.077175022152  | 1.617234447865  | 4.060105787244  |
| C | -2.929714021633 | 1.908730592414  | -4.174484218123 | C | 0.497554809900  | -0.604292500976 | 4.649327691363  |
| C | -1.101549568771 | -3.340241357158 | -1.596476888981 | C | 0.227530765504  | 0.760805512545  | 4.742209395495  |
| H | -4.783789106902 | -2.537379652698 | 4.067082708467  | H | 0.933580554638  | 2.687025315947  | 4.171959189537  |

|    |                 |                 |                 |   |                 |                 |                 |
|----|-----------------|-----------------|-----------------|---|-----------------|-----------------|-----------------|
| H  | -0.110546300195 | -1.276476030561 | 5.246258447880  | H | -0.521800532886 | -0.227983096103 | 7.215326104369  |
| C  | 3.104036288465  | 2.253642487474  | 2.729291114238  | H | 0.335671126132  | 1.313748916628  | 7.424936766783  |
| C  | -0.910848096450 | 1.247941138249  | 5.636100504450  | H | -1.410613727428 | 1.211554701296  | 7.751827666411  |
| C  | 1.737562673520  | -2.666261928007 | 3.902847386236  | C | -2.232180819544 | 0.596078404085  | 5.207273611763  |
| C  | 2.706543564946  | -2.745140982274 | -1.674433727846 | H | -2.494056453289 | 0.870624643718  | 4.174403851666  |
| C  | 1.380254641855  | -3.248975644012 | -1.173669841098 | H | -2.193584509353 | -0.500817289063 | 5.259205889816  |
| H  | 1.170146776139  | -2.881956096108 | -0.158569111756 | H | -3.047628583488 | 0.932136836038  | 5.863670701618  |
| H  | 1.402742048177  | -4.347207956059 | -1.103513808564 | C | -3.363824020360 | 3.749504928096  | 1.975832285402  |
| C  | 0.227561537209  | -2.850140552599 | -2.106820509928 | H | -3.524355438655 | 3.325728368478  | 2.977315773259  |
| H  | 0.411434886823  | -3.300893945958 | -3.092816529634 | H | -2.679632545625 | 4.598550847941  | 2.100433083506  |
| H  | 0.237157681464  | -1.761411122497 | -2.269181591796 | H | -4.330327938507 | 4.128222421430  | 1.615668539321  |
| P  | -1.452159506446 | -0.975188465451 | -0.050553729471 | C | -1.385845353925 | 2.356910896199  | 1.572966980902  |
| Pd | 0.206077726503  | 0.322792816566  | -0.911982376152 | H | -1.400994638147 | 1.966944526601  | 2.600387214455  |
| Cl | 1.001097753398  | 2.255954839511  | -2.148525720315 | H | -0.828274945714 | 1.639045049937  | 0.954648526115  |
| Cl | -1.443625020874 | -1.006187572625 | 2.016637974984  | H | -0.802975261856 | 3.291448901601  | 1.573067813069  |
| C  | 4.537111781618  | 1.735837260167  | 2.560282421477  | C | -3.782667194605 | 1.478783044754  | 1.240757825757  |
| H  | 4.676777845576  | 1.083597338619  | 1.689388467356  | H | -3.558486266655 | 0.597047331129  | 0.636913593307  |
| H  | 5.213641041802  | 2.586527734744  | 2.395351590006  | H | -3.811026017522 | 1.153100770482  | 2.290575009511  |
| H  | 4.881775510404  | 1.199382791307  | 3.456637063387  | H | -4.796823188356 | 1.802979479703  | 0.963685532839  |
| C  | 2.613489161057  | 2.865888732720  | 1.413111452847  | C | -2.515683185341 | 7.311723619738  | -0.898768751863 |
| H  | 2.584826345763  | 2.135202588297  | 0.594913391506  | H | -3.418602421162 | 7.178333650768  | -0.286678533440 |
| H  | 1.600397509168  | 3.280242852907  | 1.526947344731  | H | -1.641448564710 | 7.047979860417  | -0.287269381247 |
| H  | 3.283076719575  | 3.683718884704  | 1.105558816211  | H | -2.438940961624 | 8.379574998154  | -1.144427068918 |
| C  | 3.213869231887  | 3.399697065819  | 3.753628341400  | C | -3.808052885915 | 6.945595058817  | -2.981047053082 |
| H  | 2.302196676078  | 4.004800153983  | 3.825951423347  | H | -3.758178784767 | 8.026723063828  | -3.174573628120 |
| H  | 3.460623171333  | 3.025742835660  | 4.757002446672  | H | -3.886423659888 | 6.437290956849  | -3.951232093297 |
| H  | 4.014785238143  | 4.081811469016  | 3.439663017934  | H | -4.729767785211 | 6.743021328290  | -2.417797329693 |
| C  | 3.181355214265  | -2.907326527043 | 4.369070607985  | C | -1.307031940593 | 6.794460643887  | -2.999255398932 |
| H  | 3.929325307833  | -2.516507270943 | 3.667331024683  | H | -1.305384704604 | 6.279065083514  | -3.968492008240 |
| H  | 3.355106103583  | -2.433992080001 | 5.345414556481  | H | -1.228863023462 | 7.873538356541  | -3.194591120054 |
| H  | 3.366017048126  | -3.985949694439 | 4.474732572063  | H | -0.408321094123 | 6.481347476891  | -2.449076001151 |
| C  | 1.477360656083  | -3.421459469098 | 2.590234963847  | C | -4.115106724704 | 0.940365098648  | -4.047427212356 |
| H  | 1.502599011787  | -4.503684486714 | 2.781845969147  | H | -3.970702018608 | 0.164321676993  | -3.288577831955 |
| H  | 0.487711027589  | -3.174089763640 | 2.177803468198  | H | -5.031361174701 | 1.494153413889  | -3.796562142455 |
| H  | 2.229451166876  | -3.220440661053 | 1.818253361660  | H | -4.278270117875 | 0.429659297332  | -5.006826095873 |
| C  | 0.837183796240  | -3.342917829532 | 4.945180753906  | C | -3.303645177289 | 2.822902087561  | -5.354289531475 |
| H  | 1.106756807782  | -4.405380641652 | 5.005333101914  | H | -4.188276998142 | 3.439107039064  | -5.143380341840 |
| H  | 0.963036914311  | -2.917042673589 | 5.949453000358  | H | -2.479465676433 | 3.480754018160  | -5.659694650158 |
| H  | -0.226773417895 | -3.291064966858 | 4.671865823217  | H | -3.540920915107 | 2.189746071374  | -6.218864512173 |
| C  | -1.087858316888 | 2.764977886324  | 5.582488839236  | C | -1.654646188472 | 1.178201910467  | -4.629118598611 |
| H  | -1.936633452494 | 3.057075119915  | 6.215846121641  | H | -0.805700648756 | 1.874477303391  | -4.664525467738 |
| H  | -0.200465670178 | 3.293942638898  | 5.957150351306  | H | -1.367542939532 | 0.342098015802  | -3.981232412747 |
| H  | -1.294837082346 | 3.123971882298  | 4.563623159391  | H | -1.811660342189 | 0.770724605542  | -5.638352180294 |
| C  | -0.607015453835 | 0.859461922296  | 7.088961020220  |   |                 |                 |                 |

8D

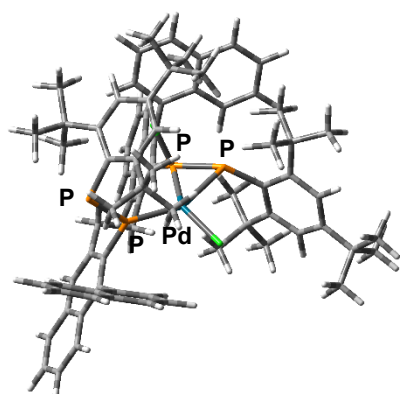

|   |                |                 |                 |   |                 |                 |                 |
|---|----------------|-----------------|-----------------|---|-----------------|-----------------|-----------------|
| C | 5.009947761085 | -3.711638060972 | 5.077922308119  | C | 3.403887129125  | 6.820520130675  | -0.582308708582 |
| C | 6.205738579563 | -0.499805281369 | 0.111365281188  | H | 2.307571665519  | -4.637564490924 | 1.362924639199  |
| C | 3.382965580748 | -2.627979634163 | 3.640205594098  | C | -3.489877264736 | -0.551138389443 | 4.192084935490  |
| C | 4.596537189007 | -2.289733904983 | 0.426978196267  | C | -3.288161977510 | -0.044444892917 | 1.841315018173  |
| C | 3.550625681660 | -2.913974129557 | 1.163157451309  | C | -4.691617638348 | 0.188383657016  | 4.268226314966  |
| C | 2.899731797846 | -2.277273742593 | 2.345996859688  | H | -3.116499323642 | -1.032937360490 | 5.098680980141  |
| C | 3.587807126015 | -4.791718052927 | -0.378116694118 | C | -4.449598251675 | 0.714016755487  | 1.879242346005  |
| C | 4.532012658430 | -4.165924362266 | -1.154140497336 | C | -5.174979217611 | 0.850219627310  | 3.103241251046  |
| C | 5.067362716571 | -2.913807671974 | -0.767207910783 | C | -5.409918967344 | 0.305520282600  | 5.482824359937  |
| C | 6.088936185166 | -2.278194727263 | -1.516699556070 | C | -6.355252534252 | 1.629729600293  | 3.209707185956  |
| C | 6.644478320817 | -1.097105927370 | -1.091804539653 | C | -6.556590979683 | 1.056495993114  | 5.550378417102  |
| H | 7.431429966813 | -0.621483459791 | -1.674822903601 | H | -5.028726249318 | -0.209889339461 | 6.364490712179  |
| H | 6.435790946328 | -2.757907379412 | -2.432292741127 | C | -7.029459333104 | 1.728434069081  | 4.402101077656  |
| H | 4.899863098403 | -4.631604253847 | -2.068836639838 | H | -6.724922802308 | 2.154999063107  | 2.330838483237  |
| C | 4.326759743513 | -3.237725745200 | 6.220207705256  | H | -7.101067148637 | 1.141460565864  | 6.489073849198  |
| C | 3.194792129662 | -2.475292381680 | 6.080452976549  | H | -7.933827615564 | 2.330964319318  | 4.464321443686  |
| C | 2.699651515926 | -2.150574243411 | 4.794723273078  | C | -4.909195410508 | 1.452222097462  | 0.670545513522  |
| H | 4.702552008902 | -3.480760186838 | 7.212244642263  | C | -6.050474645447 | 1.033083200132  | -0.078912055404 |
| H | 2.657573133647 | -2.107706190764 | 6.954289146906  | C | -4.219366217551 | 2.583093046670  | 0.284729134601  |
| C | 1.521023352600 | -1.394087338459 | 4.627331499094  | C | -6.468929162207 | 1.820664338220  | -1.193562139666 |
| H | 0.963674016896 | -1.097728005511 | 5.517889566484  | C | -6.765926013054 | -0.154173735247 | 0.219556738309  |
| C | 5.208405844942 | -1.084893553838 | 0.851129449910  | C | -4.629792556451 | 3.350631860417  | -0.825602290890 |
| H | 4.895496179104 | -0.645974794653 | 1.796611209497  | H | -3.334472446271 | 2.888721568608  | 0.844052148817  |
| C | 4.547982716225 | -3.420303146572 | 3.819222449784  | C | -7.591798732435 | 1.404000579513  | -1.948689883430 |
| H | 5.079604653931 | -3.787502306070 | 2.943559223402  | C | -5.739311969009 | 2.984227280158  | -1.541896367166 |
| H | 6.665631339655 | 0.425922013090  | 0.455855130915  | C | -7.842497960291 | -0.539870996401 | -0.542933199688 |
| H | 5.909094334043 | -4.312424294724 | 5.199269051765  | H | -6.445113062243 | -0.766448830170 | 1.062179249961  |
| C | 1.779569328251 | -1.446878296596 | 2.230299834568  | H | -4.053794964368 | 4.231288772363  | -1.104232205466 |
| C | 3.099106221136 | -4.160463044287 | 0.782933679692  | C | -8.264508666864 | 0.248795119759  | -1.635070384621 |
| P | 2.073861577261 | 0.914655496945  | -0.664787353141 | H | -7.904074899162 | 2.016148118833  | -2.795340101094 |
| C | 2.956886446253 | 2.498571047535  | -0.290444325236 | H | -6.071011354280 | 3.571556144442  | -2.398592174320 |
| C | 2.973795776044 | 3.307741026203  | 0.886018181662  | H | -8.375716837874 | -1.458082412460 | -0.302895228590 |
| C | 3.338668553960 | 3.079079274234  | -1.548508841084 | H | -9.121819752703 | -0.064222405459 | -2.228360210580 |
| C | 3.142007943605 | 4.679746841943  | 0.734628100005  | P | -2.366180202066 | -0.243066503470 | 0.257678633006  |
| C | 3.469369762716 | 4.472212344958  | -1.600968044168 | P | -3.394005049643 | -1.794711994804 | -0.601212844969 |
| C | 3.324049010677 | 5.300801380227  | -0.498878191944 | C | -2.344472982115 | -2.215469183795 | -2.076530058212 |
| H | 3.117132379511 | 5.305164740527  | 1.622703957174  | C | -2.227614727551 | -1.350825083604 | -3.193526049090 |
| H | 3.697604205428 | 4.931119683498  | -2.554754389060 | C | -1.559383131147 | -3.410226057151 | -2.021279534763 |
| C | 3.641713684074 | 2.320686825409  | -2.877233764120 | C | -1.132058938016 | -1.533818971776 | -4.050491072165 |
| C | 2.820166616208 | 2.789251872787  | 2.325987364410  | C | -0.551595921017 | -3.562620208852 | -2.971933704083 |
| C | 1.036024272993 | -1.041209107427 | 3.390174076798  | C | -0.256788057550 | -2.603226912465 | -3.942366138265 |
| H | 3.196166898283 | -5.766376240113 | -0.664378890458 | H | -0.984519237957 | -0.817030010563 | -4.852200943915 |

|    |                 |                 |                 |   |                 |                 |                 |
|----|-----------------|-----------------|-----------------|---|-----------------|-----------------|-----------------|
| H  | 0.078143027205  | -4.446369221447 | -2.933187229493 | H | 0.796283098675  | -4.977784530240 | -4.946327371005 |
| C  | -3.248209636463 | -0.269822342644 | -3.618210642978 | H | -0.089699841266 | -4.125592598861 | -6.228870053006 |
| C  | 0.952198103441  | -2.786645942922 | -4.857337011349 | H | 1.684238707212  | -4.243016015250 | -6.292924200005 |
| C  | -1.810957773384 | -4.579637871913 | -1.035700838191 | C | 2.235843147132  | -2.806298780828 | -4.016258756615 |
| C  | -2.777321303671 | -0.668873268146 | 3.023629618112  | H | 2.377103036241  | -1.851861430620 | -3.484248102442 |
| C  | -1.444527566641 | -1.367377324515 | 3.048842234468  | H | 2.226794303827  | -3.607510342808 | -3.263358305629 |
| H  | -1.244962559368 | -1.890296098154 | 2.101008214439  | H | 3.109815979373  | -2.966392635956 | -4.665155805879 |
| H  | -1.440359089323 | -2.137092452099 | 3.834789831451  | C | 4.510636034489  | 3.183205642867  | -3.813605318728 |
| C  | -0.309515148260 | -0.368579763807 | 3.333871689657  | H | 4.842516524837  | 2.558103035222  | -4.652613638314 |
| H  | -0.507853654319 | 0.111420852920  | 4.303411777697  | H | 3.964703956009  | 4.027853274079  | -4.252303949642 |
| H  | -0.346907313535 | 0.434456690158  | 2.585350603422  | H | 5.406414145457  | 3.568414663734  | -3.308013173546 |
| P  | 1.335696990197  | -0.697374200114 | 0.618013763233  | C | 2.363449235875  | 2.011717056237  | -3.678240303971 |
| Pd | -0.234320065435 | 0.841212200718  | -0.032337861935 | H | 2.639981775293  | 1.624055725473  | -4.670078188338 |
| Cl | -0.827714830991 | 3.076164206946  | -0.793183776929 | H | 1.711152465660  | 1.270023111192  | -3.200896446602 |
| Cl | 1.176349013500  | -2.210143022584 | -0.774194169571 | H | 1.776814403545  | 2.930139216690  | -3.826882047854 |
| C  | -4.661985123352 | -0.528640445861 | -3.089864628477 | C | 4.487187645242  | 1.058854637226  | -2.642179528092 |
| H  | -4.773674620221 | -0.340851505496 | -2.015244869669 | H | 3.997701572290  | 0.281510830819  | -2.043969465873 |
| H  | -5.365291546760 | 0.158705290774  | -3.581336394982 | H | 4.739298470309  | 0.601313410446  | -3.609751602851 |
| H  | -4.991443179948 | -1.556789815272 | -3.301216053115 | H | 5.428298388420  | 1.320704709162  | -2.137555578338 |
| C  | -2.785542621985 | 1.126059853010  | -3.194197682193 | C | 3.579397689314  | 7.318133522218  | -2.015443441814 |
| H  | -2.749539717486 | 1.240414427212  | -2.103273451093 | H | 4.520270338856  | 6.966405664988  | -2.461204526810 |
| H  | -1.778928913203 | 1.344822447853  | -3.582146287296 | H | 2.749957903321  | 7.001228960496  | -2.662942378999 |
| H  | -3.476222840596 | 1.889214728782  | -3.585210708399 | H | 3.603596173693  | 8.416213072868  | -2.020311139140 |
| C  | -3.391703723196 | -0.275048113658 | -5.153274333635 | C | 4.594796189262  | 7.317822486693  | 0.245894854697  |
| H  | -2.499001001406 | 0.088888828831  | -5.675154215188 | H | 4.659494195552  | 8.413936991690  | 0.191146243531  |
| H  | -3.625619687252 | -1.279668200665 | -5.532422278474 | H | 4.507021753584  | 7.042057188976  | 1.304942529357  |
| H  | -4.214305622010 | 0.394712032841  | -5.437348146852 | H | 5.537792187368  | 6.901811620402  | -0.135546775050 |
| C  | -3.245026488904 | -5.092881790083 | -1.234858812790 | C | 2.106059081649  | 7.418961593592  | -0.025645647323 |
| H  | -4.003662675200 | -4.334632372315 | -1.000734956831 | H | 1.942347774585  | 7.146290324399  | 1.024950855425  |
| H  | -3.399496238821 | -5.414860171172 | -2.274092312859 | H | 2.141435073233  | 8.516185535282  | -0.084234357040 |
| H  | -3.431061717373 | -5.955102318892 | -0.578502456712 | H | 1.236835849238  | 7.074237887998  | -0.603511866606 |
| C  | -1.588379823366 | -4.232933438034 | 0.445892824113  | C | 3.569883338505  | 1.471050096459  | 2.496873195903  |
| H  | -1.642856558260 | -5.155183072513 | 1.041949405049  | H | 3.256457659603  | 0.708896110875  | 1.780997331366  |
| H  | -0.598672802730 | -3.781368788460 | 0.610319093673  | H | 4.648943970258  | 1.630516829539  | 2.350194458363  |
| H  | -2.346278547369 | -3.551941349481 | 0.851243263934  | H | 3.416636926606  | 1.062744167241  | 3.507068983138  |
| C  | -0.883853247323 | -5.770159819353 | -1.314977822340 | C | 3.435981316182  | 3.742364922940  | 3.361576860912  |
| H  | -1.150935513768 | -6.591439784049 | -0.637174873007 | H | 4.476136675134  | 3.996821033126  | 3.115336848092  |
| H  | -0.982654127210 | -6.148151822064 | -2.341184443304 | H | 2.868668179192  | 4.673368874876  | 3.483835624215  |
| H  | 0.173176716061  | -5.524903797566 | -1.130823293223 | H | 3.434347237549  | 3.242061528567  | 4.339585028123  |
| C  | 1.079211803270  | -1.662294283968 | -5.883302352917 | C | 1.335058849436  | 2.657966636645  | 2.670678907793  |
| H  | 1.968290290908  | -1.832837109188 | -6.505584992162 | H | 0.854403609291  | 3.646969889942  | 2.660638807763  |
| H  | 0.209408409384  | -1.617706848821 | -6.553782488333 | H | 0.793157867961  | 2.035557945757  | 1.946149060560  |
| H  | 1.194863518655  | -0.680774454307 | -5.402140561597 | H | 1.207054512501  | 2.221510543838  | 3.673027351911  |
| C  | 0.824990159007  | -4.111218652225 | -5.619741335912 |   |                 |                 |                 |

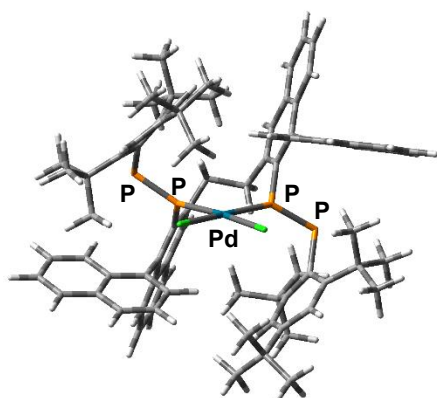

|   |                 |                 |                 |   |                 |                 |                 |
|---|-----------------|-----------------|-----------------|---|-----------------|-----------------|-----------------|
| C | -5.631251109883 | 3.647880671774  | 3.198535186555  | C | 0.739436594302  | -5.111935510962 | -3.368227417483 |
| C | -7.001558156655 | -1.067607314357 | 0.522945598049  | H | -2.408620996832 | 2.366566660301  | -0.560096632435 |
| C | -4.036027892486 | 1.932802275022  | 2.561510614971  | C | 1.862515121905  | -0.262197380060 | 3.283904647719  |
| C | -5.178380268942 | 0.410232264501  | -0.102368923172 | C | 2.479328511496  | -1.046126771532 | 4.227717153200  |
| C | -3.965056513284 | 1.103685141210  | 0.196221279214  | C | 2.363665866707  | -0.272766295709 | 1.943735533039  |
| C | -3.428779821860 | 1.086165340159  | 1.584733858184  | C | 3.559488458991  | -1.896047042556 | 3.903426279355  |
| C | -3.885440482434 | 1.931518276348  | -2.086744184089 | H | 2.109697980780  | -1.038129545859 | 5.255592558626  |
| C | -5.063261315253 | 1.298292651662  | -2.387788943162 | C | 3.428782957838  | -1.086223603627 | 1.584753053975  |
| C | -5.736318272327 | 0.525063156316  | -1.410285260105 | C | 4.036012504757  | -1.932905143597 | 2.561502619262  |
| C | -6.943693557853 | -0.152335995149 | -1.707391946341 | C | 4.150026273534  | -2.741663810024 | 4.873694105183  |
| C | -7.565279651668 | -0.932979567689 | -0.763986281371 | C | 3.965102760242  | -1.103683168119 | 0.196256250424  |
| H | -8.489886919183 | -1.453711211278 | -1.006468343905 | P | 2.633982290503  | 2.575377683212  | 0.992106137736  |
| H | -7.363806886478 | -0.049383364889 | -2.708205229980 | C | 5.085578503224  | -2.831470922952 | 2.239180596722  |
| H | -5.496983573425 | 1.373716766730  | -3.384954889882 | C | 5.162477178942  | -3.601662670248 | 4.529847854508  |
| C | -5.162532840496 | 3.601464420631  | 4.529914736525  | H | 3.775147261367  | -2.701993312923 | 5.896299108288  |
| C | -4.150090709846 | 2.741447087280  | 4.873740195551  | C | 5.178409283065  | -0.410171434266 | -0.102271773566 |
| C | -3.559532178218 | 1.895878466229  | 3.903442860120  | C | 3.339890550238  | -1.841772473501 | -0.787803141995 |
| H | -5.605324495496 | 4.252892804012  | 5.281058908227  | C | 1.811073180294  | 3.778140182772  | -0.138050967948 |
| H | -3.775233908061 | 2.701724964380  | 5.896351376287  | C | 5.631226704880  | -3.648010135172 | 3.198477003648  |
| C | -2.479377080456 | 1.045945170493  | 4.227715401820  | H | 5.449934664782  | -2.876858261110 | 1.214327948843  |
| H | -2.109767256595 | 1.037900489025  | 5.255597974630  | H | 5.605252792122  | -4.253128390512 | 5.280969049211  |
| C | -5.841466984805 | -0.405855940825 | 0.848507924866  | C | 5.736413058704  | -0.524967655033 | -1.410163329412 |
| H | -5.418775458533 | -0.508139613072 | 1.847736860567  | C | 5.841419724699  | 0.405932798789  | 0.848646459691  |
| C | -5.085583034836 | 2.831388470489  | 2.239209937252  | C | 3.885647122458  | -1.931537164621 | -2.086708938620 |
| H | -5.449915469827 | 2.876828949589  | 1.214351128702  | H | 2.408766486571  | -2.366648412204 | -0.560138186327 |
| H | -7.493352971811 | -1.694924145633 | 1.264391900205  | C | 2.385730921171  | 4.055140372383  | -1.413900597524 |
| H | -6.430177211682 | 4.337346414186  | 2.932422946029  | C | 0.527421082871  | 4.285197916804  | 0.177174393158  |
| C | -2.363670154802 | 0.272690680309  | 1.943700793946  | H | 6.430161127409  | -4.337459844298 | 2.932348334755  |
| C | -3.339759011152 | 1.841738313756  | -0.787807664806 | C | 5.063447917348  | -1.298243458417 | -2.387697123904 |
| P | -2.633998035693 | -2.575413139613 | 0.991981870707  | C | 6.943768301501  | 0.152495517080  | -1.707209599092 |
| C | -1.811084272418 | -3.778152183353 | -0.138195638852 | C | 7.001492772670  | 1.067746623514  | 0.523142358744  |
| C | -2.385728322179 | -4.055109407086 | -1.414059629241 | H | 5.418682802664  | 0.508181738524  | 1.847860173087  |
| C | -0.527439392013 | -4.285229000947 | 0.177032849411  | H | 3.364625409589  | -2.510501089369 | -2.848519368567 |
| C | -1.531477615779 | -4.518514638599 | -2.409530911509 | C | 1.531489443325  | 4.518563909442  | -2.409371550403 |
| C | 0.276830773530  | -4.720066668589 | -0.883945434294 | C | 3.898263597211  | 3.962933799728  | -1.709332237275 |
| C | -0.172387286654 | -4.768083087624 | -2.196152238933 | C | -0.276841388996 | 4.720050984983  | -0.883803999653 |
| H | -1.930652259490 | -4.674553375121 | -3.408424938619 | C | -0.024965727704 | 4.565311506754  | 1.591592784328  |
| H | 1.288467839533  | -5.049762191766 | -0.659349965153 | H | 5.497229806692  | -1.373658138627 | -3.384838169305 |
| C | 0.024932666468  | -4.565382660337 | 1.591449947493  | C | 7.565273817689  | 0.933164456224  | -0.763768366887 |
| C | -3.898256340473 | -3.962875054973 | -1.709514270980 | H | 7.363932131359  | 0.049571342837  | -2.708004811916 |
| C | -1.862543437158 | 0.262061632770  | 3.283878119099  | H | 7.493226268338  | 1.695079898194  | 1.264618444103  |
| H | -3.364333518243 | 2.510419286900  | -2.848537248359 | C | 0.172393257062  | 4.768103505823  | -2.196004728771 |



|    |                 |                 |                 |   |                 |                 |                 |
|----|-----------------|-----------------|-----------------|---|-----------------|-----------------|-----------------|
| H  | 1.930676459187  | 4.674637937661  | -3.408256036764 | H | -0.520970745746 | -4.744771211370 | 3.664781031367  |
| H  | -1.288485092632 | 5.049727855917  | -0.659213755169 | H | -1.914492774786 | -4.836820749797 | 2.577912754521  |
| H  | 8.489864916394  | 1.453947867842  | -1.006204976090 | H | -1.147290238256 | -3.269344822676 | 2.951289147380  |
| C  | -0.739418854670 | 5.111947002524  | -3.368086396684 | C | 0.355982731993  | -6.070066951936 | 1.655495845647  |
| C  | 0.608407623067  | 0.475950153278  | 3.649469747351  | H | 0.733055960349  | -6.320675446634 | 2.656845435809  |
| H  | 0.704500898832  | 0.951355978102  | 4.636107399434  | H | 1.121642332340  | -6.371407044630 | 0.931895005396  |
| H  | 0.413810260182  | 1.290701517051  | 2.938553256076  | H | -0.542678915315 | -6.674666817344 | 1.469301297568  |
| P  | 1.613838014915  | 0.826395480427  | 0.673069415588  | C | -2.157276604938 | 5.460587563933  | -2.918974034327 |
| P  | -1.613832057516 | -0.826433365742 | 0.673007252680  | H | -2.176639933935 | 6.354462253542  | -2.279479613828 |
| Pd | 0.000029825522  | -0.000015927101 | -0.805272139574 | H | -2.631970485687 | 4.636164833493  | -2.366741971264 |
| Cl | -1.417205031994 | -0.828152563680 | -2.522866505527 | H | -2.780058675038 | 5.668935053045  | -3.799454084650 |
| Cl | 1.417326702352  | 0.828132288490  | -2.522813468391 | C | -0.184767032226 | 6.308846741478  | -4.148300983137 |
| C  | -0.608441421911 | -0.476100406846 | 3.649432773865  | H | 0.811122104565  | 6.111074629376  | -4.564825607801 |
| H  | -0.413826878073 | -1.290815414473 | 2.938479804701  | H | -0.113423760582 | 7.197181293320  | -3.505246766744 |
| H  | -0.704554075218 | -0.951556428102 | 4.636044262053  | H | -0.851329384681 | 6.550127884965  | -4.988503610697 |
| C  | -4.371614884483 | -2.538567499862 | -2.001848934129 | C | -0.813058481279 | 3.887925125538  | -4.290363933348 |
| H  | -3.829577894650 | -2.108141891784 | -2.853803139207 | H | -1.179075595479 | 3.005533796742  | -3.741862711728 |
| H  | -4.235637217767 | -1.859529232818 | -1.150002168968 | H | 0.170502689964  | 3.631025075596  | -4.706318012810 |
| H  | -5.445742221011 | -2.550924889479 | -2.238852232928 | H | -1.496809872026 | 4.081356726791  | -5.129673600389 |
| C  | -4.704010474585 | -4.539022996032 | -0.536026285131 | C | 4.269737675008  | 4.812242885867  | -2.932654455515 |
| H  | -5.770303688247 | -4.569808820731 | -0.801386891834 | H | 3.918571993561  | 5.849063669082  | -2.837806868967 |
| H  | -4.630882500048 | -3.933080360962 | 0.377669655307  | H | 3.875697946747  | 4.395422684410  | -3.868597549401 |
| H  | -4.380342618509 | -5.560918479248 | -0.293866647065 | H | 5.363278693929  | 4.834067855858  | -3.030149209027 |
| C  | -4.269722111616 | -4.812197811580 | -2.932831838436 | C | 4.703976468276  | 4.539125157844  | -0.535840438538 |
| H  | -3.918571079354 | -5.849022653927 | -2.837961083426 | H | 5.770286465773  | 4.569876983440  | -0.801150915583 |
| H  | -3.875661187104 | -4.395399164973 | -3.868776368577 | H | 4.630785536507  | 3.933239818870  | 0.377888218845  |
| H  | -5.363261592771 | -4.834007604105 | -3.030346147706 | H | 4.380314089642  | 5.561039183830  | -0.293756065377 |
| C  | 0.184778306700  | -6.308836038041 | -4.148450077399 | C | 4.371656132907  | 2.538633971527  | -2.001640249773 |
| H  | 0.851347343597  | -6.550130946510 | -4.988650228172 | H | 3.829641798743  | 2.108190223551  | -2.853599244041 |
| H  | -0.811103117020 | -6.111048366761 | -4.564988162340 | H | 4.235680235935  | 1.859595292522  | -1.149794266548 |
| H  | 0.113414197884  | -7.197173615679 | -3.505390183312 | H | 5.445786663986  | 2.551012254689  | -2.238626629306 |
| C  | 0.813110223859  | -3.887913026811 | -4.290514880295 | C | 0.953195927024  | 4.328867833847  | 2.743900563217  |
| H  | 1.179146101299  | -3.005522519346 | -3.742015960793 | H | 0.520919932343  | 4.744662361341  | 3.664930585030  |
| H  | -0.170440709961 | -3.630992529428 | -4.706481739548 | H | 1.914449382961  | 4.836749260619  | 2.578074546665  |
| H  | 1.496862318780  | -4.081369306322 | -5.129824012201 | H | 1.147259123535  | 3.269258120857  | 2.951413092452  |
| C  | 2.157283139298  | -5.460598381265 | -2.919093156852 | C | -1.300211711571 | 3.766015047474  | 1.858756317872  |
| H  | 2.176625241435  | -6.354470906746 | -2.279590195041 | H | -1.111462488600 | 2.683206462707  | 1.811734017904  |
| H  | 2.631982542570  | -4.636177633018 | -2.366858378388 | H | -2.092640406539 | 3.998734997607  | 1.133139837691  |
| H  | 2.780073014600  | -5.668963191014 | -3.799565905358 | H | -1.695689722730 | 3.996346445856  | 2.859964335138  |
| C  | 1.300190233545  | -3.766110538744 | 1.858640280433  | C | -0.356036950409 | 6.069988399678  | 1.655669377496  |
| H  | 1.111461552276  | -2.683297038457 | 1.811633928329  | H | -0.733120423929 | 6.320568588316  | 2.657022127760  |
| H  | 2.092623876181  | -3.998831944384 | 1.133029057426  | H | -1.121695304600 | 6.371333395731  | 0.932070366145  |
| H  | 1.695654234566  | -3.996466278829 | 2.859847899008  | H | 0.542616767054  | 6.674604835820  | 1.469493619858  |
| C  | -0.953235449561 | -4.328952368186 | 2.743756229850  |   |                 |                 |                 |

8F

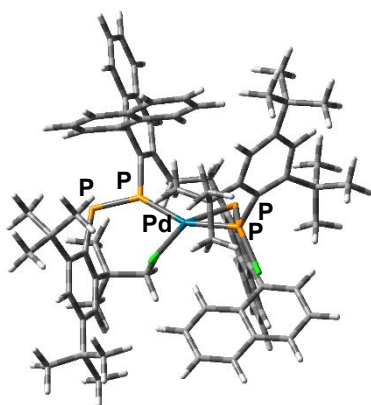

|    |                 |                 |                 |    |                 |                 |                 |
|----|-----------------|-----------------|-----------------|----|-----------------|-----------------|-----------------|
| C  | 2.289570133360  | -4.113940992131 | 3.026915118957  | C  | -4.741713188048 | 4.557303959544  | 3.758587287181  |
| C  | 1.603425714365  | -3.513828755724 | 1.920607483151  | C  | -4.696069876381 | 3.864901297672  | 4.987725025549  |
| C  | 1.925166679556  | -3.746628570657 | 4.353131798014  | H  | 2.284861239206  | -4.056239837196 | 6.459852622705  |
| C  | 0.927973984791  | -2.764874427279 | 4.538847342137  | H  | 3.627899862608  | -5.356941529092 | 1.851513142172  |
| C  | 0.613613845998  | -2.568528611636 | 2.143628033982  | H  | -3.643890369314 | 2.404535453602  | 6.156069479765  |
| P  | -1.717923606130 | -3.470446882718 | 0.686685018816  | H  | -5.454559681139 | 4.052180959284  | 5.745468958201  |
| C  | 0.290022963941  | -2.170193711998 | 3.479863580855  | H  | -5.540162883424 | 5.273450070809  | 3.573110288570  |
| C  | -0.750732934449 | 1.464369773966  | 3.487055611212  | H  | -3.850246343691 | 4.891832783698  | 1.858456250250  |
| C  | -1.696415482039 | 1.751152502703  | 4.438217204577  | C  | -1.834872122268 | 4.033093162621  | 0.813458738100  |
| C  | -0.735768267561 | 2.189203445623  | 2.237663743682  | C  | -1.370686109966 | 5.328511794259  | 0.883691175215  |
| C  | 0.153552046760  | 0.300492723084  | 3.793647539830  | C  | -2.668576053980 | 3.645120671016  | -0.276870297222 |
| H  | 0.593553844088  | 0.412475195422  | 4.795502370555  | C  | -1.686847133570 | 6.277655915324  | -0.110918554489 |
| H  | 1.007186419776  | 0.233983536530  | 3.106394944751  | H  | -0.784652982583 | 5.634587893648  | 1.750906385209  |
| P  | 0.777300492703  | 1.712979229494  | 1.243779453990  | C  | -3.017163549514 | 4.614064961186  | -1.264316739500 |
| P  | -0.416209585352 | -1.889164196219 | 0.749993182453  | C  | -2.508640727180 | 5.931516382015  | -1.153986101431 |
| Pd | -0.062840482009 | 0.196111680220  | -0.411517387199 | H  | -1.297141039859 | 7.290765009676  | -0.028360490187 |
| Cl | -1.257003654838 | -0.409711727208 | -2.462486021103 | C  | -4.312517420646 | 2.937744531727  | -2.449984787762 |
| C  | -0.636316595372 | -1.022454231609 | 3.736026871258  | C  | -3.847430158679 | 4.226594694081  | -2.344055448572 |
| H  | -1.399036656918 | -0.944953704203 | 2.948633714314  | C  | -3.963826962916 | 1.979111393351  | -1.474584426216 |
| H  | -1.184428322875 | -1.166352128856 | 4.678268959310  | C  | -3.165274690363 | 2.328531462159  | -0.412567756259 |
| H  | 0.671333712427  | -2.463480489953 | 5.556943090273  | H  | -4.311015823997 | 0.948010429636  | -1.567512378472 |
| C  | -2.709645689170 | 2.704667016950  | 4.232822565032  | H  | -4.949151052036 | 2.653369207280  | -3.287568433573 |
| C  | -2.734103929354 | 3.406794582443  | 2.996974276896  | H  | -4.106166290237 | 4.973234632944  | -3.095328836891 |
| C  | -1.715030234604 | 3.158650175763  | 2.013189070933  | H  | -2.780999381458 | 6.662859260593  | -1.915330896814 |
| H  | -1.681832471618 | 1.201158823603  | 5.381899116347  | H  | -2.875199585512 | 1.578557950282  | 0.322664451997  |
| C  | 3.576435372685  | -5.273702020651 | 5.254347529497  | C  | 3.626070262749  | -1.967128727947 | 0.522138474726  |
| H  | 4.078488295704  | -5.730450296143 | 6.105296957167  | C  | 4.870461706886  | -3.013124350428 | -1.753983257817 |
| C  | 3.952978225499  | -5.631678169082 | 3.942112722978  | C  | 4.701179313708  | -1.322474100991 | -0.037191798734 |
| H  | 4.746267582136  | -6.361110697706 | 3.789076012674  | C  | 5.344147680049  | -1.863772362589 | -1.172622534732 |
| C  | 3.327195403385  | -5.067925858327 | 2.856922862225  | H  | 5.351958121506  | -3.427393481733 | -2.640034902390 |
| C  | 2.582499568254  | -4.348648743577 | 5.452781567898  | H  | 6.214253729978  | -1.360768768762 | -1.593486300796 |
| C  | 2.065243740527  | -3.910025003687 | 0.563447663513  | H  | 5.061547027994  | -0.390073631831 | 0.399219182945  |
| C  | 1.625108820541  | -5.075835404562 | -0.023813198001 | H  | 3.147331643314  | -1.557865882251 | 1.412152122873  |
| C  | 3.127576890595  | -3.171667521310 | -0.038994177308 | P  | 0.975612531439  | 2.239518004149  | -0.860264614695 |
| C  | 2.200339005792  | -5.553167709111 | -1.220340348118 | Cl | 0.017505218108  | 3.717226693443  | -1.944530010253 |
| H  | 0.838497429169  | -5.651836879702 | 0.465481658369  | C  | 2.789559829972  | 2.381308829856  | -1.186807930842 |
| C  | 3.745764318845  | -3.687863049026 | -1.216765928146 | C  | 3.395105973352  | 1.568281204181  | -2.203579030957 |
| C  | 3.246989567178  | -4.879197892401 | -1.798191522502 | C  | 3.616601588693  | 3.154000814871  | -0.304600452713 |
| H  | 1.821141431983  | -6.470643395410 | -1.667781622317 | C  | 4.790048005327  | 1.469788155401  | -2.202746528747 |
| H  | 3.721221467508  | -5.257358825585 | -2.703915242176 | C  | 4.986511011232  | 2.885387419351  | -0.323715982430 |
| C  | -3.695951107382 | 2.955440995374  | 5.216981046277  | C  | 5.609439155837  | 2.075024336251  | -1.260759052128 |
| C  | -3.789752707152 | 4.339547942344  | 2.793240927733  | H  | 5.261512525224  | 0.875096094291  | -2.973481333092 |

|   |                 |                 |                 |   |                 |                 |                 |
|---|-----------------|-----------------|-----------------|---|-----------------|-----------------|-----------------|
| H | 5.615070348866  | 3.400074539557  | 0.397359390766  | H | 1.614115720433  | 5.248474393057  | -0.500778122846 |
| C | -3.076138111556 | -3.001940059764 | -0.472093143276 | H | 1.100028991953  | 4.336631743050  | 0.935601266781  |
| C | -3.035165549211 | -3.435433479316 | -1.833074001443 | H | 1.873102505602  | 5.898104478911  | 1.120474198848  |
| C | -4.153487083349 | -2.197895021020 | -0.010909753180 | C | 3.572414463864  | 4.034742506839  | 2.077158206607  |
| C | -3.960911409868 | -2.880798536462 | -2.710650900405 | H | 2.901890444551  | 3.242498696610  | 2.438098007739  |
| C | -5.029559064438 | -1.673636662555 | -0.971447534273 | H | 4.605081381595  | 3.701304548841  | 2.239515559533  |
| C | -4.933463671074 | -1.959958476428 | -2.324620533003 | H | 3.410095673347  | 4.925972210275  | 2.699692298858  |
| H | -3.921439379043 | -3.161636881989 | -3.758569463160 | C | -0.651963402791 | -3.922342929225 | -2.617225670655 |
| H | -5.823661291040 | -1.012907513207 | -0.639284700842 | H | -0.698501957366 | -3.034552392977 | -3.261636682513 |
| C | 3.286583043520  | 4.373946052318  | 0.608889517976  | H | -0.153928066043 | -3.625727563586 | -1.685711611703 |
| C | 2.689756330092  | 0.772470737554  | -3.334781811262 | H | -0.019043443415 | -4.681572119632 | -3.100895657040 |
| C | 7.131562670496  | 1.954547042532  | -1.270287931616 | C | -2.003233638527 | -5.737116773786 | -1.498633432284 |
| C | -2.058945973500 | -4.495168805274 | -2.398306504469 | H | -3.002820197679 | -6.177845215376 | -1.376459842207 |
| C | -4.485941681574 | -1.838146875138 | 1.460187722380  | H | -1.348171731732 | -6.493790309461 | -1.953772669177 |
| C | -5.863126050191 | -1.355146580983 | -3.372951309732 | H | -1.601485482165 | -5.541908958003 | -0.495949481289 |
| C | 2.328950516416  | -0.632402087850 | -2.837696571733 | C | -2.522150524299 | -5.015426692919 | -3.767698361976 |
| H | 3.233403581487  | -1.175889478632 | -2.538771963511 | H | -1.868862195881 | -5.845147715560 | -4.068224238673 |
| H | 1.640418448782  | -0.612744437240 | -1.982000353597 | H | -3.553384113498 | -5.394140009609 | -3.740924995826 |
| H | 1.831590414285  | -1.195887498881 | -3.641813092990 | H | -2.449727935733 | -4.253545211799 | -4.554754599973 |
| C | 1.455595015038  | 1.478980104503  | -3.899893256535 | C | -5.027054785681 | -0.585708551647 | -4.403411398674 |
| H | 0.593028899866  | 1.449209585825  | -3.230722238135 | H | -4.302877389625 | -1.234824703918 | -4.913414889265 |
| H | 1.677296454970  | 2.521883979165  | -4.166416700214 | H | -5.681430156510 | -0.144875346814 | -5.169377396027 |
| H | 1.130950716921  | 0.957729625600  | -4.810826484549 | H | -4.461995973269 | 0.228611975403  | -3.926359748318 |
| C | 3.623552135294  | 0.575659412254  | -4.545748637637 | C | -6.637432282944 | -2.474929046701 | -4.079493698357 |
| H | 3.038573021559  | 0.138950704100  | -5.364994436093 | H | -7.312422000108 | -2.048232990958 | -4.835258016720 |
| H | 4.045350961657  | 1.525605843782  | -4.902585894459 | H | -5.971133539235 | -3.181879958182 | -4.590708684770 |
| H | 4.447187645614  | -0.123494758479 | -4.351470437949 | H | -7.245936982877 | -3.042521295291 | -3.361491507571 |
| C | 7.652247682028  | 1.197007943197  | -2.490434287778 | C | -6.884263390959 | -0.392273383884 | -2.768705353173 |
| H | 7.289821281625  | 0.160733166433  | -2.530843456005 | H | -7.546507411576 | -0.895388663415 | -2.050163188681 |
| H | 7.368643721615  | 1.693082025530  | -3.429141073662 | H | -6.408262491894 | 0.457095815162  | -2.257623817013 |
| H | 8.748954712428  | 1.155661126736  | -2.453075681842 | H | -7.515701535072 | 0.018640308897  | -3.568223928785 |
| C | 7.599154150189  | 1.229455760282  | -0.003214546493 | C | -3.950223613003 | -0.437315321621 | 1.784030006143  |
| H | 8.697518270589  | 1.202471724194  | 0.031487687973  | H | -2.874358696320 | -0.352883397123 | 1.566700417561  |
| H | 7.246635792066  | 1.729642753911  | 0.908969615719  | H | -4.470691762237 | 0.327660843718  | 1.189668003656  |
| H | 7.239520135817  | 0.190624989344  | 0.020460131280  | H | -4.102929751303 | -0.198982737851 | 2.848618517029  |
| C | 7.751024334179  | 3.359274098156  | -1.304421552451 | C | -6.012530444322 | -1.821064506116 | 1.673295163019  |
| H | 7.516792529490  | 3.943981634894  | -0.405437646936 | H | -6.224307586489 | -1.647987195820 | 2.736665731536  |
| H | 8.845347852566  | 3.282284177240  | -1.369309272241 | H | -6.524855438026 | -1.024598623533 | 1.122840139293  |
| H | 7.396693492547  | 3.923619539670  | -2.178257041182 | H | -6.465072669860 | -2.781232652975 | 1.389442090582  |
| C | 4.208117601426  | 5.535754799335  | 0.168979631173  | C | -3.970688720951 | -2.838179128365 | 2.503622456246  |
| H | 5.276062712597  | 5.337109081179  | 0.309376878771  | H | -4.222585853915 | -3.874063448262 | 2.235202298798  |
| H | 4.046659536022  | 5.776981897145  | -0.890877515293 | H | -2.890979744036 | -2.781816860689 | 2.687436224682  |
| H | 3.966989170002  | 6.430581255566  | 0.758692854305  | H | -4.445322092262 | -2.622589366355 | 3.470993864702  |
| C | 1.886076673888  | 4.974201621480  | 0.525564538969  |   |                 |                 |                 |

8G

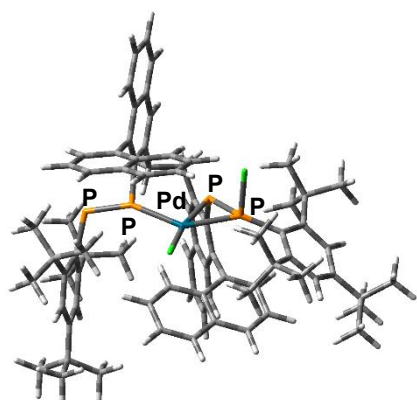

|    |                 |                 |                 |    |                 |                 |                 |
|----|-----------------|-----------------|-----------------|----|-----------------|-----------------|-----------------|
| C  | -3.003900095261 | -4.440010971387 | 1.848441481882  | C  | 2.318120130960  | 5.184004593595  | 3.164756669392  |
| C  | -2.965058172759 | -3.251888075941 | 1.054429415225  | C  | 1.892854541046  | 5.045186807138  | 4.503306596150  |
| C  | -2.489352732570 | -4.403142706809 | 3.175287111971  | H  | -2.116196236225 | -5.531513560188 | 4.979826124907  |
| C  | -1.990350164015 | -3.184460389925 | 3.681314437601  | H  | -3.944942310331 | -5.704939369272 | 0.356969026043  |
| C  | -2.437547826628 | -2.077512699033 | 1.579125776283  | H  | 1.106952132643  | 3.705126347108  | 5.983204475250  |
| P  | -3.946953779635 | 0.402492984508  | 0.937930658175  | H  | 1.911737192140  | 5.905307330308  | 5.170013574158  |
| C  | -1.958844248208 | -2.033127313016 | 2.931072135223  | H  | 2.658332174323  | 6.153334552164  | 2.805115782949  |
| C  | 0.755177518095  | 0.398307634620  | 3.683852105413  | H  | 2.643577800172  | 4.237143150282  | 1.284727787302  |
| C  | 0.875705170233  | 1.474927681837  | 4.523579683096  | C  | 2.356753583949  | 1.917389741177  | 0.513215506754  |
| C  | 1.253674351439  | 0.496475436227  | 2.331449686516  | C  | 3.725230812451  | 1.968023107538  | 0.349567374498  |
| C  | -0.029211368966 | -0.796130625262 | 4.173298117916  | C  | 1.508489108741  | 2.331577683817  | -0.558746769395 |
| H  | -0.073237817181 | -0.753976079382 | 5.269092011206  | C  | 4.300870899328  | 2.436628787017  | -0.848809090408 |
| H  | 0.463931334464  | -1.745764814701 | 3.925843164743  | H  | 4.373844533471  | 1.693532089490  | 1.183293180918  |
| P  | 0.971911576962  | -1.101795600460 | 1.447426339977  | C  | 2.096165852841  | 2.786574752835  | -1.777275724798 |
| P  | -2.222671143097 | -0.607783735059 | 0.466353964016  | C  | 3.505643919755  | 2.846388218656  | -1.886489713312 |
| Pd | -0.098651586128 | -0.722497269741 | -0.630799777881 | H  | 5.383784168333  | 2.490357259651  | -0.935070762384 |
| Cl | -0.690768357033 | -0.723256413084 | -3.001972015174 | C  | -0.110371144714 | 3.137044256128  | 3.137044256128  |
| C  | -1.469672109910 | -0.767396460077 | 3.590324507172  | C  | 1.256085937490  | 3.182523218267  | -2.847711950539 |
| H  | -1.546939188120 | 0.068331608228  | 2.886197326344  | C  | -0.693549939809 | 2.715712331572  | -1.509876767548 |
| H  | -2.166555593516 | -0.510380272727 | 4.403100601027  | C  | 0.094939117477  | 2.336139760791  | -0.451354681305 |
| H  | -1.637269885481 | -3.158089443069 | 4.715062403006  | H  | -1.777569395555 | 2.676074933012  | -1.418275529980 |
| C  | 1.409965467700  | 2.707429397661  | 4.092730944736  | H  | -0.751941483226 | 3.425533132909  | -3.556442831416 |
| C  | 1.857321350061  | 2.831612470309  | 2.747367892928  | H  | 1.722142930083  | 3.516557859813  | -3.775529650165 |
| C  | 1.803362627034  | 1.691894172102  | 1.877770052093  | H  | 3.946676817495  | 3.219011958399  | -2.812334815790 |
| H  | 0.502234863756  | 1.400246760632  | 5.546743082882  | H  | -0.363448469208 | 2.032358183949  | 0.488060415440  |
| C  | -3.027051956033 | -6.748249078787 | 3.466258504971  | C  | -1.474229192520 | -4.268078981403 | -1.301354003147 |
| H  | -3.040415404461 | -7.646937468331 | 4.080274908432  | C  | -2.746449175675 | -4.500597428064 | -3.779745112491 |
| C  | -3.545502123824 | -6.788195576483 | 2.153075905193  | C  | -0.802493936400 | -4.787288741155 | -2.381535886035 |
| H  | -3.956706030889 | -7.718000977450 | 1.764260998276  | C  | -1.442249234840 | -4.903552870771 | -3.634821998249 |
| C  | -3.537712779142 | -5.663460960446 | 1.365649526377  | H  | -3.252194620630 | -4.589019749802 | -4.741568142801 |
| C  | -2.513174576391 | -5.578468844530 | 3.965686263672  | H  | -0.898087545416 | -5.314028409686 | -4.483627616768 |
| C  | -3.555966635384 | -3.317215545409 | -0.313354560765 | H  | 0.235672052852  | -5.099383548703 | -2.273141920660 |
| C  | -4.879765492418 | -2.968982008666 | -0.483267520532 | H  | -0.968979758679 | -4.170700882322 | -0.340034880790 |
| C  | -2.821293245760 | -3.844457347270 | -1.417435387340 | P  | 2.164541301719  | -1.572855712365 | -0.314403817733 |
| C  | -5.520615326940 | -3.102639559799 | -1.732385853866 | Cl | 1.817686545815  | -3.655365197731 | -0.264926318609 |
| H  | -5.442522161945 | -2.598505441787 | 0.374979741175  | C  | -3.952982265678 | 2.070140106678  | 0.122025299984  |
| C  | -3.470999945854 | -3.971677279752 | -2.682847333600 | C  | -4.409457983615 | 2.239436001486  | -1.218091889758 |
| C  | -4.828211445073 | -3.590143719724 | -2.811577280743 | C  | -3.530973801619 | 3.213179756874  | 0.871536041389  |
| H  | -6.568699136115 | -2.824333077182 | -1.829618388465 | C  | -4.211036652045 | 3.483640372213  | -1.827340151941 |
| H  | -5.312900650214 | -3.701077175837 | -3.781823181482 | C  | -3.354430954950 | 4.409204118993  | 0.175750904913  |
| C  | 1.450515935683  | 3.827944749411  | 4.956005211150  | C  | -3.638618167369 | 4.567981665762  | -1.176093539639 |
| C  | 2.307954222701  | 4.107725319668  | 2.311701042284  | H  | -4.514397062291 | 3.607663225221  | -2.860191441029 |

|   |                 |                 |                 |   |                 |                 |                 |
|---|-----------------|-----------------|-----------------|---|-----------------|-----------------|-----------------|
| H | -2.977500481257 | 5.271949699365  | 0.716584625210  | H | 3.600341284969  | -0.323384713165 | 2.799843805917  |
| C | 3.970504218274  | -1.354596910534 | -0.598713424290 | H | 4.634791973291  | -1.189030274772 | 3.954305417591  |
| C | 4.365320295419  | -1.005205141115 | -1.931044319911 | H | 5.339035007754  | 0.032547733758  | 2.875608492586  |
| C | 4.918856314286  | -1.277415268013 | 0.476418611255  | C | 3.887176247164  | -3.026963985899 | 2.134720531168  |
| C | 5.595144475682  | -0.361161919797 | -2.086600495398 | H | 2.836873464161  | -2.728234416625 | 2.107004572134  |
| C | 6.110214051166  | -0.604547428636 | 0.206971015410  | H | 4.041519466076  | -3.834343769482 | 1.408036614565  |
| C | 6.458321051866  | -0.090956710876 | -1.035894646660 | H | 4.061608934834  | -3.442481722431 | 3.135998106873  |
| H | 5.880198773121  | -0.037072315515 | -3.080761206303 | C | -1.771702442267 | 3.019310341096  | 2.672931500606  |
| H | 6.819571730242  | -0.479071369085 | 1.018451379113  | H | -1.456528679550 | 2.031023053775  | 2.310415766404  |
| C | 4.869826499217  | -1.877555118442 | 1.912457959848  | H | -1.135227330265 | 3.773221708171  | 2.184656389489  |
| C | 3.604614666366  | -1.268550013518 | -3.258727579392 | H | -1.570582890909 | 3.054145309768  | 3.754770898565  |
| C | 7.795101797359  | 0.617846931238  | -1.229888560606 | C | -3.586677934927 | 4.680588474218  | 2.948704152609  |
| C | -3.254464283621 | 3.280919294478  | 2.395841949189  | H | -4.610665960949 | 4.984786249373  | 2.691550037328  |
| C | -5.136086966071 | 1.164288058915  | -2.058305961297 | H | -3.504060427116 | 4.659446156627  | 4.043002895212  |
| C | -3.384713326917 | 5.910530293664  | -1.854506556022 | H | -2.898021462910 | 5.460455681273  | 2.604238062671  |
| C | 2.648514640170  | -2.464610216172 | -3.228129125293 | C | -4.108517378745 | 2.319756407940  | 3.232107808758  |
| H | 1.732587301266  | -2.273116696696 | -2.662370205235 | H | -4.026171443390 | 2.591969992633  | 4.293117299237  |
| H | 2.316893299043  | -2.675814499256 | -4.254116312835 | H | -5.170791992241 | 2.370440882979  | 2.953996062192  |
| H | 3.137624525002  | -3.368586950773 | -2.840376306312 | H | -3.788180040279 | 1.273091040536  | 3.167440936561  |
| C | 2.832592502255  | -0.012670506984 | -3.670002742072 | C | -4.124641464369 | 0.211563709708  | -2.701898754721 |
| H | 2.339537896693  | -0.180179467180 | -4.639104555120 | H | -3.406267429327 | 0.771752076428  | -3.318133306573 |
| H | 2.050698047469  | 0.240061140451  | -2.942192639703 | H | -3.544452020082 | -0.359044011922 | -1.968578507818 |
| H | 3.506934837966  | 0.849807415990  | -3.768995294999 | H | -4.643077383170 | -0.513018019920 | -3.348426114374 |
| C | 4.608839442426  | -1.599604516080 | -4.382266051909 | C | -6.168487195613 | 0.392219382122  | -1.227621165374 |
| H | 5.285459342759  | -2.415798782083 | -4.093674925490 | H | -6.773214091385 | -0.241849361114 | -1.890431159894 |
| H | 4.048216939996  | -1.923707348777 | -5.268365251330 | H | -5.725237677662 | -0.285841995656 | -0.486777953830 |
| H | 5.215561883969  | -0.744123166401 | -4.700289238895 | H | -6.845970799969 | 1.078781317189  | -0.700189955877 |
| C | 8.899197269045  | -0.448912588743 | -1.219280543295 | C | -5.941438029065 | 1.795123083420  | -3.206601628738 |
| H | 9.882740793250  | 0.020904004596  | -1.363685819464 | H | -6.633872304018 | 2.570268032227  | -2.849871863829 |
| H | 8.920419280971  | -0.997172919692 | -0.267223798854 | H | -5.304329477302 | 2.228604149087  | -3.987693501492 |
| H | 8.746025357913  | -1.177904798828 | -2.027248942892 | H | -6.535882806197 | 1.009444062391  | -3.690643129013 |
| C | 7.864046033663  | 1.370672849649  | -2.559287204432 | C | -4.298994895260 | 6.969789070347  | -1.226214138065 |
| H | 7.831268296098  | 0.691726417888  | -3.421864792065 | H | -4.131168271763 | 7.946211631489  | -1.703147873269 |
| H | 7.045571319862  | 2.097744982221  | -2.666365002555 | H | -5.356655116607 | 6.702437902270  | -1.359956520905 |
| H | 8.811892682790  | 1.922065231598  | -2.618810664747 | H | -4.113298031144 | 7.085845440636  | -0.149967401643 |
| C | 8.060697364471  | 1.616713690044  | -0.097473389086 | C | -1.920242064974 | 6.320830116476  | -1.658608209293 |
| H | 7.282119303803  | 2.390842704591  | -0.041594574860 | H | -1.654887330324 | 6.424532100014  | -0.598311293992 |
| H | 8.123647257627  | 1.133553454355  | 0.885507614813  | H | -1.239492947678 | 5.580564050557  | -2.103702564112 |
| H | 9.020425776940  | 2.122453944580  | -0.271112403324 | H | -1.734722581593 | 7.290204338088  | -2.142857990879 |
| C | 6.245643373265  | -2.502422603283 | 2.242566061516  | C | -3.665558846257 | 5.865613113286  | -3.355042222598 |
| H | 6.551253163249  | -3.220525917245 | 1.469427703246  | H | -4.721168714192 | 5.651066048227  | -3.571854355180 |
| H | 7.051779852180  | -1.771887014596 | 2.368788141251  | H | -3.431476691261 | 6.841749269853  | -3.800953999027 |
| H | 6.168512175846  | -3.044277557848 | 3.194134331003  | H | -3.048924795410 | 5.110393642326  | -3.863179937342 |
| C | 4.592963133334  | -0.772305800213 | 2.937578004106  |   |                 |                 |                 |

$\delta_H$ 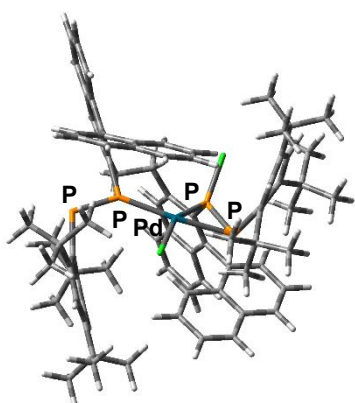

|    |                 |                 |                 |    |                 |                 |                 |
|----|-----------------|-----------------|-----------------|----|-----------------|-----------------|-----------------|
| C  | 1.956117382972  | 4.269002676602  | 3.321889753372  | C  | -0.144229134755 | -6.156683127931 | 5.111418120244  |
| C  | 1.903434287061  | 3.443313261619  | 2.150352544300  | H  | 2.088458945040  | 3.958920374201  | 6.740046128359  |
| C  | 1.981087624042  | 3.651834201242  | 4.605545772798  | H  | 1.918778907527  | 6.182185802492  | 2.298502481418  |
| C  | 1.890946053507  | 2.246144228802  | 4.691245864270  | H  | 0.553958276766  | -4.443348847975 | 6.197478872515  |
| C  | 1.811759102765  | 2.060469018774  | 2.277087396479  | H  | 0.195467806364  | -6.872985615385 | 5.857029083020  |
| P  | 3.869325933963  | 0.929534012611  | 0.591770193995  | H  | -0.918796080674 | -7.681668099937 | 3.779860412165  |
| C  | 1.780440447624  | 1.456564207708  | 3.574344057282  | H  | -1.705047276904 | -6.097556979920 | 2.088674650936  |
| C  | -0.517274248559 | -1.570264760606 | 3.554720315261  | C  | -2.218816149988 | -3.937041713143 | 1.021367694693  |
| C  | -0.135534893711 | -2.498348736571 | 4.491144670241  | C  | -3.517442188401 | -4.378966600530 | 1.140672786557  |
| C  | -1.262089067301 | -2.007682090721 | 2.406398354560  | C  | -1.505426101362 | -4.167089363584 | -0.191946283782 |
| C  | -0.063508566900 | -0.153215806768 | 3.775379017240  | C  | -4.179720210524 | -5.000758131856 | 0.061059202824  |
| H  | -0.441244994106 | 0.222523527997  | 4.738953860443  | H  | -4.042555306256 | -4.237484452311 | 2.085855259615  |
| H  | -0.466346450875 | 0.530915051545  | 3.024206305364  | C  | -2.179325584537 | -4.783897958997 | -1.286368664432 |
| P  | 1.828299794228  | 0.933143243259  | 0.791115131337  | C  | -3.527344980291 | -5.189278238227 | -1.131097181075 |
| Pd | -0.200480078284 | -0.006920206142 | -0.274658047183 | H  | -5.213290341001 | -5.320675022763 | 0.181256081067  |
| Cl | 0.906301217837  | 0.003666119279  | -2.443348655477 | C  | -0.179024828934 | -4.560044492191 | -2.644731339734 |
| C  | 1.466350094026  | -0.000818521111 | 3.746702982152  | C  | -1.484469229461 | -4.965309634665 | -2.507454271530 |
| H  | 1.874732774155  | -0.609162540888 | 2.926705686339  | C  | 0.492236692565  | -3.964093668984 | -1.554913292046 |
| H  | 1.910891120957  | -0.387040626528 | 4.674412319810  | C  | -0.155277850511 | -3.779143763309 | -0.358431374056 |
| H  | 1.878585441801  | 1.781569034073  | 5.679805083931  | H  | 1.525351983446  | -3.630485096318 | -1.665709635721 |
| C  | -0.381568094339 | -3.875793136186 | 4.335682540477  | H  | 0.342120110013  | -4.702106342145 | -3.590603807334 |
| C  | -1.049657393452 | -4.324447876926 | 3.162264918782  | H  | -2.010385665428 | -5.433855037968 | -3.339635346650 |
| C  | -1.518524480340 | -3.366688946516 | 2.204995070482  | H  | -4.032362864170 | -5.661630964002 | -1.973763994442 |
| H  | 0.404012907591  | -2.164788185984 | 5.379790329491  | H  | 0.364497330504  | -3.310182202642 | 0.475216567199  |
| C  | 2.090731877742  | 5.822703320815  | 5.677874845563  | C  | -0.343871863325 | 3.408581700615  | 0.203133187631  |
| H  | 2.148493517862  | 6.432031187451  | 6.577963762339  | C  | -0.028294181031 | 4.599352299148  | -2.307150658571 |
| C  | 2.032783885233  | 6.442771653196  | 4.411462513206  | C  | -1.351891468970 | 3.340575256815  | -0.728933830700 |
| H  | 2.035605536832  | 7.529056370211  | 4.342009733572  | C  | -1.185770695253 | 3.929181682824  | -2.001333195144 |
| C  | 1.968210365424  | 5.687707707550  | 3.265826809266  | H  | 0.097663690542  | 5.076952053773  | -3.279055561806 |
| C  | 2.061108638896  | 4.454160208190  | 5.769347926962  | H  | -1.985008976218 | 3.846610973598  | -2.735963437271 |
| C  | 1.977953449248  | 4.102761357903  | 0.820818106111  | H  | -2.286257249153 | 2.828890584930  | -0.490449020309 |
| C  | 3.125220128802  | 4.789198400218  | 0.473640735007  | H  | -0.487061656865 | 2.962924418629  | 1.187458289083  |
| C  | 0.884015373556  | 4.057458047903  | -0.094492493849 | P  | -2.414559573258 | -1.148205692070 | -0.789714215594 |
| C  | 3.242283551119  | 5.454588169658  | -0.762317297022 | P  | -1.745522396084 | -0.689783424104 | 1.211025846114  |
| H  | 3.957193474195  | 4.814239706789  | 1.178164529661  | Cl | -2.891819450706 | 0.652841299627  | 2.325536174953  |
| C  | 1.027113775402  | 4.691851861729  | -1.367209712993 | C  | -3.665504977367 | 0.171462169101  | -1.230552336992 |
| C  | 2.212751916992  | 5.403497736720  | -1.666917335940 | C  | -3.488160279327 | 0.871521255405  | -2.459341024850 |
| H  | 4.160050656902  | 5.990079701737  | -0.999103170671 | C  | -4.736201219964 | 0.592652588692  | -0.374071093905 |
| H  | 2.295779439165  | 5.894555061963  | -2.636749129279 | C  | -4.071194096276 | 2.141445947211  | -2.583102421597 |
| C  | 0.052789418941  | -4.813350146670 | 5.303412869453  | C  | -5.214182332139 | 1.890202709775  | -0.530361677382 |
| C  | -1.219951546421 | -5.725021419753 | 2.987547810121  | C  | -4.848468782174 | 2.721560470197  | -1.590803310865 |
| C  | -0.779167380355 | -6.613804269062 | 3.936245055678  | H  | -3.916559133937 | 2.686113153353  | -3.511352964721 |

|   |                 |                 |                 |   |                 |                 |                 |
|---|-----------------|-----------------|-----------------|---|-----------------|-----------------|-----------------|
| H | -5.977842109663 | 2.244314421415  | 0.158597119579  | H | 2.099271450379  | -1.962838100365 | 1.230229382047  |
| C | 4.296878128193  | -0.304319353849 | -0.720966562948 | H | 2.488036160534  | -3.592062291292 | 0.635751206780  |
| C | 4.637977936604  | 0.141012902564  | -2.031029449163 | H | 2.769256074298  | -3.188444980634 | 2.343243388389  |
| C | 4.272477587698  | -1.700026500208 | -0.433976825461 | C | 5.139280123899  | -3.609605660200 | 0.985162120191  |
| C | 4.724508357433  | -0.816887273778 | -3.043962536162 | H | 5.175805768907  | -4.013405540392 | 2.005654575023  |
| C | 4.326980661142  | -2.583128776999 | -1.514819283478 | H | 4.772220022480  | -4.418949254166 | 0.344506489397  |
| C | 4.514340764462  | -2.173441629056 | -2.831113093367 | H | 6.166514365615  | -3.368618868374 | 0.678529586129  |
| H | 4.951579039945  | -0.487796858364 | -4.050384843946 | C | -6.321241393407 | 0.284167290604  | 1.647473093275  |
| H | 4.241673452978  | -3.649859375704 | -1.320428343389 | H | -6.933730938753 | -0.471813227129 | 2.157562587509  |
| C | 4.244182725377  | -2.354384769555 | 0.970698325647  | H | -5.574688853808 | 0.648143980349  | 2.363340180905  |
| C | 4.941159496229  | 1.606336748555  | -2.418066426631 | H | -6.994011087571 | 1.113757285457  | 1.399414936508  |
| C | 4.544912817380  | -3.201358807277 | -3.958377483289 | C | -5.107238233815 | -1.702587669604 | 0.830131069568  |
| C | -5.673802511083 | -0.353931022440 | 0.412408436702  | H | -4.643016128760 | -2.240364437073 | -0.005812646642 |
| C | -5.405221043740 | 4.138577766395  | -1.673552739687 | H | -4.379966276861 | -1.630181713559 | 1.647950822599  |
| C | -2.920982026656 | 0.302415237980  | -3.782327176965 | H | -5.930771522284 | -2.335852303212 | 1.191642996404  |
| C | 3.659655661707  | 2.441378016834  | -2.486324278231 | C | -6.795785252750 | -0.659192406357 | -0.605463997958 |
| H | 2.920250222737  | 1.967389181109  | -3.146903254226 | H | -6.387317402741 | -1.146143343318 | -1.503358058331 |
| H | 3.187129281039  | 2.575365204911  | -1.506114636581 | H | -7.538731767950 | -1.334119420189 | -0.155750405370 |
| H | 3.891719957490  | 3.443094910918  | -2.875458096206 | H | -7.310838412532 | 0.257787556029  | -0.921823913806 |
| C | 5.946942442098  | 2.244454621674  | -1.450055848618 | C | -4.893728699521 | 4.940809660936  | -0.470931402696 |
| H | 6.885375035658  | 1.672535097435  | -1.427260584278 | H | -5.188265779773 | 4.480138530371  | 0.481562399341  |
| H | 6.178127291037  | 3.267167434331  | -1.781046460087 | H | -3.796229317917 | 5.013827080265  | -0.485709213077 |
| H | 5.578453943519  | 2.325354614514  | -0.419840105238 | H | -5.302919586611 | 5.961150880579  | -0.493185335794 |
| C | 5.594867958727  | 1.710595415126  | -3.803961486269 | C | -4.982673663763 | 4.862515360298  | -2.950147265837 |
| H | 6.502761696809  | 1.097000079986  | -3.884295895622 | H | -3.890805640293 | 4.958237652707  | -3.029401814185 |
| H | 4.910226193683  | 1.431784895262  | -4.615750338736 | H | -5.352200270565 | 4.355092164745  | -3.852152006940 |
| H | 5.883302891388  | 2.755859588151  | -3.976474775646 | H | -5.400335446938 | 5.878475760434  | -2.948998713090 |
| C | 3.211640569466  | -3.956600323581 | -3.985286092708 | C | -6.938866367630 | 4.096297343997  | -1.646194127062 |
| H | 3.043479614351  | -4.526496699685 | -3.060865617114 | H | -7.328391492863 | 3.501808980686  | -2.484806208611 |
| H | 2.372136316593  | -3.255946804885 | -4.113774105887 | H | -7.329363017682 | 3.664486095929  | -0.715665251529 |
| H | 3.194183054542  | -4.670742765916 | -4.821231213584 | H | -7.344339575083 | 5.114401121678  | -1.733199662663 |
| C | 5.690357926595  | -4.192694905932 | -3.721559069725 | C | -4.140544778387 | 0.179521027196  | -4.719750086733 |
| H | 5.715389144738  | -4.941808587602 | -4.526035184434 | H | -3.824353474915 | -0.246315126577 | -5.682802181202 |
| H | 6.659203241450  | -3.673954584624 | -3.709418336042 | H | -4.897741666759 | -0.488518130842 | -4.282804388870 |
| H | 5.582702958172  | -4.729038557699 | -2.769324776119 | H | -4.619120339365 | 1.145391673796  | -4.921444600823 |
| C | 4.748368761009  | -2.558262668273 | -5.328797819531 | C | -1.888301255099 | 1.237099229726  | -4.422393485419 |
| H | 5.710998477746  | -2.032942780388 | -5.398042192973 | H | -1.015745085601 | 1.368152500600  | -3.769321166438 |
| H | 4.742303074234  | -3.337689054545 | -6.102740256102 | H | -1.536223837752 | 0.797468050251  | -5.366993952821 |
| H | 3.947282799927  | -1.844860287292 | -5.568098256949 | H | -2.301192630512 | 2.225380721736  | -4.662488948957 |
| C | 4.806167295924  | -1.477605666102 | 2.097504059331  | C | -2.309874034202 | -1.097664966917 | -3.725823996407 |
| H | 4.957197283158  | -2.097568074092 | 2.992057200931  | H | -1.356718210557 | -1.121912087707 | -3.184275828184 |
| H | 5.779343953512  | -1.043928920110 | 1.826507348260  | H | -3.002633880289 | -1.841075654680 | -3.302903211405 |
| H | 4.141799256926  | -0.663130157629 | 2.408536570048  | H | -2.094709615717 | -1.420257314937 | -4.755165610295 |
| C | 2.816724780657  | -2.793829456961 | 1.315997111153  |   |                 |                 |                 |

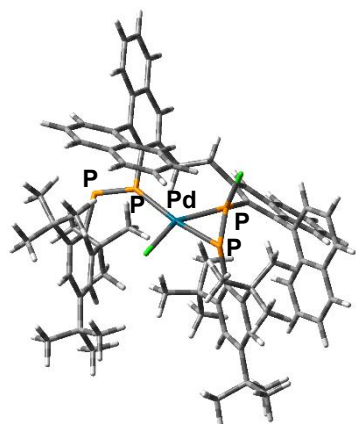

|    |                 |                 |                 |    |                 |                 |                 |
|----|-----------------|-----------------|-----------------|----|-----------------|-----------------|-----------------|
| C  | -5.489545093054 | -3.326783403451 | -0.035160865711 | C  | 5.098010652149  | -4.637803925744 | 3.594550769755  |
| C  | -4.749747983226 | -2.128311304340 | -0.299318137154 | C  | 4.177102036931  | -4.822659661832 | 4.648727502177  |
| C  | -5.122702897396 | -4.133704966341 | 1.080942769375  | H  | -5.582121893222 | -5.893088703657 | 2.245955708755  |
| C  | -3.981550374575 | -3.785277835164 | 1.835247155460  | H  | -6.853082567375 | -3.174181750785 | -1.715712638781 |
| C  | -3.649093446732 | -1.807265863000 | 0.489082435032  | H  | 2.121351410901  | -4.711834584457 | 5.248460646407  |
| P  | -4.020370026278 | 0.897106096049  | 1.505191351747  | H  | 4.522579515864  | -5.201916267479 | 5.608540408183  |
| C  | -3.222242024882 | -2.680313019328 | 1.536899793082  | H  | 6.147032144147  | -4.884733488729 | 3.745441177273  |
| C  | 0.537451288878  | -3.423379955618 | 1.759729756467  | H  | 5.400465388783  | -4.029368780230 | 1.574996850231  |
| C  | 1.005268520740  | -3.887700076602 | 2.962614646100  | C  | 3.790841303573  | -3.182069166143 | -0.235891824819 |
| C  | 1.489101566325  | -3.011803792162 | 0.774615184447  | C  | 3.606967166897  | -4.104180138485 | -1.248936850117 |
| C  | -0.930318979888 | -3.504584629630 | 1.445131422542  | C  | 4.929471917496  | -2.318396154647 | -0.272714008272 |
| H  | -1.262497902165 | -4.531259615921 | 1.664087958176  | C  | 4.521705341982  | -4.226765863228 | -2.314000016041 |
| H  | -1.096275488993 | -3.382220731793 | 0.364566671970  | H  | 2.752754358899  | -4.778238079311 | -1.199916750204 |
| P  | -2.776709603053 | -0.185211567716 | 0.285267545858  | C  | 5.859953542087  | -2.456382808321 | -1.346712485065 |
| Pd | -0.541367590859 | -0.026597229681 | -0.690958175943 | C  | 5.634164054950  | -3.427497563444 | -2.352149270043 |
| Cl | -0.706813428718 | 2.148318250002  | -1.786793578446 | H  | 4.347112863892  | -4.971641869065 | -3.087681216461 |
| C  | -1.868523841165 | -2.539705827558 | 2.181726242598  | C  | 7.216253126386  | -0.672370637697 | -0.417295189688 |
| H  | -1.478664339009 | -1.514434464421 | 2.110173547311  | C  | 6.994812444762  | -1.608952085528 | -1.395043234702 |
| H  | -1.907973836894 | -2.791781569325 | 3.251902183546  | C  | 6.306295955203  | -0.545027026635 | 0.654195964216  |
| H  | -3.674466135242 | -4.443791840857 | 2.651377138151  | C  | 5.190335047160  | -1.340985980632 | 0.719195582625  |
| C  | 2.386250875775  | -4.052171052197 | 3.209483046269  | H  | 6.482447188136  | 0.197831500475  | 1.431409014652  |
| C  | 3.318887295122  | -3.818332855338 | 2.155040283429  | H  | 8.094181013355  | -0.028400240793 | -0.463297985310 |
| C  | 2.851399764665  | -3.272878879365 | 0.916255853611  | H  | 7.689162319339  | -1.719546070547 | -2.228622938189 |
| H  | 0.296595044775  | -4.207800415036 | 3.729397733297  | H  | 6.359525947938  | -3.517843583086 | -3.161370764295 |
| C  | -6.934820849929 | -5.669737040397 | 0.596331606061  | H  | 4.495205971364  | -1.229050291618 | 1.551077816821  |
| H  | -7.503693359844 | -6.566981872917 | 0.833234409385  | C  | -3.101588489318 | -1.573717163727 | -2.737385796718 |
| C  | -7.279943863712 | -4.896095933300 | -0.532661556734 | C  | -4.045306605486 | 0.208891239234  | -4.669329599083 |
| H  | -8.107865402824 | -5.207146133687 | -1.167182676956 | C  | -2.324480266347 | -1.249519460768 | -3.824144861108 |
| C  | -6.577220371853 | -3.756738565914 | -0.839770572723 | C  | -2.792509409119 | -0.337514710997 | -4.794553145255 |
| C  | -5.874182370511 | -5.295765158499 | 1.382108376574  | H  | -4.428673003430 | 0.899144272242  | -5.421282707597 |
| C  | -5.199706887936 | -1.238493543942 | -1.403436413785 | H  | -2.164021266660 | -0.082786203049 | -5.645998215475 |
| C  | -6.443803552706 | -0.644977250306 | -1.318204110164 | H  | -1.336700785754 | -1.697519099841 | -3.931066176051 |
| C  | -4.383741543051 | -0.991452498354 | -2.552688555233 | H  | -2.725505881262 | -2.285774898387 | -2.002577104789 |
| C  | -6.936599339258 | 0.194155351947  | -2.337128818891 | P  | 1.642165191221  | -0.225928480169 | -1.594936655054 |
| H  | -7.056291864352 | -0.832235826817 | -0.435369810876 | P  | 0.837122138267  | -1.950632922208 | -0.561001832942 |
| C  | -4.871646375107 | -0.105529798825 | -3.562316440644 | Cl | 0.357969366791  | -3.246948983478 | -2.135266469686 |
| C  | -6.163424546957 | 0.459254647967  | -3.437693440499 | C  | 3.027042462549  | 0.819127354719  | -0.911347997491 |
| H  | -7.924531767691 | 0.639500731744  | -2.234419036931 | C  | 3.228894523105  | 1.414524959413  | 0.380383194099  |
| H  | -6.521421532567 | 1.121465214128  | -4.226492599644 | C  | 3.952449586277  | 1.115647789060  | -1.980570121958 |
| C  | 2.848370980301  | -4.545070497538 | 4.454055383133  | C  | 4.327858622644  | 2.260616610404  | 0.531733432496  |
| C  | 4.679872194209  | -4.157086171841 | 2.379046855739  | C  | 5.051445304619  | 1.929423820187  | -1.689340817046 |



|   |                 |                 |                 |   |                 |                |                 |
|---|-----------------|-----------------|-----------------|---|-----------------|----------------|-----------------|
| C | 5.262070942900  | 2.524713805523  | -0.458327777572 | C | 7.220911571146  | 3.018083610436 | 1.037427113880  |
| H | 4.476569053221  | 2.750923942055  | 1.485725740893  | H | 6.598519723836  | 2.917881734867 | 1.936912038018  |
| H | 5.771042612613  | 2.131221600490  | -2.469248021991 | H | 7.702462050400  | 2.047864394577 | 0.848460560814  |
| C | -3.261891825485 | 2.588695622943  | 1.568196790520  | H | 8.013668611135  | 3.745613948485 | 1.262126676629  |
| C | -3.515733609172 | 3.550372781422  | 0.551051040197  | C | 7.380104075789  | 3.590072979841 | -1.365032316971 |
| C | -2.375316063645 | 2.906652571656  | 2.638390199418  | H | 7.820305739777  | 2.616453191656 | -1.624542081104 |
| C | -2.677238586962 | 4.664336968671  | 0.493775766591  | H | 6.889277148627  | 3.995680846501 | -2.260702252775 |
| C | -1.600723403198 | 4.063899800451  | 2.518222778974  | H | 8.203731604567  | 4.268940117304 | -1.105637551329 |
| C | -1.677015878031 | 4.919020857373  | 1.424374865729  | C | -0.010471554650 | 5.990079536746 | -0.087215033688 |
| H | -2.805844034989 | 5.368241574506  | -0.324276140518 | H | 0.660222251097  | 6.849105408248 | -0.233674691426 |
| H | -0.892352871612 | 4.302256490166  | 3.302713022657  | H | 0.597587372732  | 5.073394515710 | -0.107782958869 |
| C | -4.668086581293 | 3.498533014882  | -0.477048552885 | H | -0.697529181068 | 5.951962227831 | -0.943062943434 |
| C | -2.304868544414 | 2.127095626980  | 3.975454448063  | C | 0.274671946438  | 6.244131878878 | 2.363478227631  |
| C | -0.759091401089 | 6.124634649195  | 1.244999028056  | H | 0.916582361421  | 5.353612707543 | 2.428631955109  |
| C | 3.823331716116  | 0.706934110083  | -3.485888371780 | H | 0.924653919323  | 7.108505529968 | 2.170496651171  |
| C | 2.318407508693  | 1.356510281899  | 1.639368507809  | H | -0.197479311282 | 6.399224406817 | 3.343825662986  |
| C | 6.418005351757  | 3.482212085679  | -0.183404919988 | C | -1.593218686532 | 7.411444061066 | 1.232554172921  |
| C | 1.171290607838  | 2.350843829507  | 1.442276635082  | H | -2.139484784439 | 7.532368353738 | 2.178666168828  |
| H | 0.530534285493  | 2.084369614455  | 0.590216632056  | H | -0.939008303385 | 8.285705643867 | 1.103053831949  |
| H | 0.538852777291  | 2.388439465641  | 2.342141107494  | H | -2.326919135035 | 7.420906519648 | 0.415777936915  |
| H | 1.565060673971  | 3.363690914493  | 1.265408702969  | C | -4.218344876712 | 2.814969586854 | -1.770739991862 |
| C | 1.748060170490  | -0.019230933478 | 1.964680380687  | H | -3.337373000011 | 3.317496244608 | -2.192038772973 |
| H | 1.261664741699  | 0.002977137757  | 2.950551959920  | H | -3.948044009140 | 1.762653334185 | -1.611327309366 |
| H | 0.966910572579  | -0.317921727483 | 1.259542957937  | H | -5.031877565734 | 2.843689777152 | -2.511457516529 |
| H | 2.521024639611  | -0.797347952141 | 1.999025205262  | C | -5.922083058770 | 2.808204755637 | 0.070384794555  |
| C | 3.059741820169  | 1.778990813055  | 2.924311553939  | H | -6.207456011214 | 3.209035858256 | 1.053890385205  |
| H | 3.305732857859  | 2.847476728902  | 2.956106225218  | H | -6.761012542820 | 2.972070786881 | -0.620610927496 |
| H | 2.399523709887  | 1.593270409607  | 3.781862956278  | H | -5.820180118210 | 1.718364309764 | 0.156538497024  |
| H | 3.983304642634  | 1.201746192461  | 3.081180370061  | C | -5.123662513006 | 4.923140378911 | -0.844362410013 |
| C | 2.589626990880  | 1.381418661684  | -4.118602029482 | H | -5.356916197502 | 5.519844451755 | 0.048624975262  |
| H | 1.629837479404  | 1.007545145979  | -3.748733179144 | H | -4.385093009871 | 5.470816212114 | -1.441912729729 |
| H | 2.619304874958  | 2.465613211079  | -3.936651704101 | H | -6.032730511201 | 4.859628072711 | -1.456840377259 |
| H | 2.604823292848  | 1.221267464889  | -5.206210098518 | C | -1.799702312272 | 0.682832213304 | 3.839202197355  |
| C | 3.852070445682  | -0.811421292187 | -3.728273378849 | H | -2.561359236054 | 0.000634070022 | 3.445386042188  |
| H | 3.646603995948  | -1.012741066792 | -4.789712192544 | H | -0.920265197542 | 0.623284211580 | 3.180086263396  |
| H | 4.851890330350  | -1.201217077196 | -3.498950925989 | H | -1.510735138480 | 0.298095761634 | 4.827777693411  |
| H | 3.135668886193  | -1.395764356841 | -3.141001734255 | C | -1.370389271164 | 2.803834394087 | 4.987333222346  |
| C | 5.003682859045  | 1.221091556227  | -4.332083182733 | H | -1.656612595281 | 3.843315858863 | 5.193887812711  |
| H | 4.859549641140  | 0.872206261778  | -5.362836118566 | H | -1.425692189851 | 2.255062665769 | 5.936577896604  |
| H | 5.059375679006  | 2.317341970713  | -4.367522503395 | H | -0.319019468117 | 2.787404160559 | 4.663991103059  |
| H | 5.970602601541  | 0.826055731125  | -3.990672469735 | C | -3.699622789306 | 2.123558323745 | 4.618777812282  |
| C | 5.840208035972  | 4.876729571765  | 0.092703856097  | H | -3.667019877060 | 1.599436298239 | 5.584816223301  |
| H | 5.257078212721  | 5.234957619712  | -0.767200201334 | H | -4.047257628201 | 3.150417250326 | 4.798017363435  |
| H | 5.182946804388  | 4.882091104846  | 0.972340130748  | H | -4.449976492114 | 1.616533456388 | 3.997413508295  |
| H | 6.653268524676  | 5.593645163726  | 0.276627763788  |   |                 |                |                 |

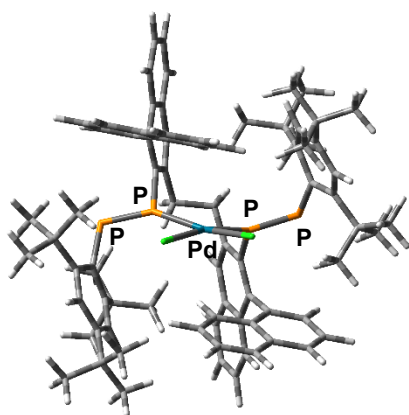

|    |                 |                 |                 |   |                 |                 |                 |
|----|-----------------|-----------------|-----------------|---|-----------------|-----------------|-----------------|
| C  | 1.851717953636  | -4.024119545132 | 2.635959493457  | C | -2.810748962411 | 4.194191081716  | 4.727005732244  |
| C  | 0.904615850643  | -3.480664884471 | 1.712261581058  | C | -2.671887081499 | 5.203976938878  | 2.122644951102  |
| C  | 1.968342626485  | -3.451562380341 | 3.934750160818  | C | -3.574344133693 | 5.717815475825  | 3.020768937979  |
| C  | 1.152124779484  | -2.352431954369 | 4.273342743611  | C | -3.641724210980 | 5.214251224589  | 4.338535949867  |
| C  | 0.179162808914  | -2.345245464615 | 2.058002791371  | H | 2.982629774131  | -3.533472259418 | 5.840637003194  |
| P  | -2.665782313419 | -2.613808106154 | 1.246378085826  | H | 2.643716025119  | -5.541829989012 | 1.301774416826  |
| C  | 0.293666541644  | -1.779558946730 | 3.367278473557  | H | -2.855691437081 | 3.792112489063  | 5.739081181567  |
| C  | -0.225036887118 | 1.932545757981  | 3.281225727193  | H | -4.356754970214 | 5.636149922674  | 5.042384189827  |
| C  | -1.062514335135 | 2.544467465187  | 4.181351124935  | H | -4.243177740138 | 6.520498372496  | 2.716046687300  |
| C  | -0.141671494545 | 2.440877103820  | 1.946326058101  | H | -2.627888372704 | 5.601917945413  | 1.110645865766  |
| P  | 2.685225314359  | 2.655739326091  | 1.050727301570  | C | -0.708953239807 | 4.243690309263  | 0.254913036070  |
| C  | 0.510482363897  | 0.696920061654  | 3.708676215160  | C | 0.019356667422  | 5.415606296934  | 0.217604812835  |
| H  | 0.973230779538  | 0.845292591162  | 4.694989675103  | C | -1.375483898582 | 3.792708206569  | -0.919854223095 |
| H  | 1.338511960377  | 0.476012623548  | 3.021769977652  | C | 0.121291979456  | 6.177847146581  | -0.963446468279 |
| P  | 0.966077702208  | 1.589087805972  | 0.737241331960  | H | 0.508162542398  | 5.763438840260  | 1.128570683520  |
| P  | -0.962595454250 | -1.552514545619 | 0.840699198253  | C | -1.261811455287 | 4.561311373396  | -2.118514810784 |
| Pd | -0.020611715463 | -0.016519355441 | -0.681748689474 | C | -0.510393489295 | 5.760555066342  | -2.107872965614 |
| Cl | -1.259566740994 | -1.210741497251 | -2.331865124331 | H | 0.705781376439  | 7.096447746275  | -0.959364986585 |
| Cl | 1.168014619046  | 1.093382195365  | -2.428327599625 | C | -2.662989389341 | 2.955203550942  | -3.281443104515 |
| C  | -0.431295040537 | -0.525175282331 | 3.755806635906  | C | -1.917557004756 | 4.108506381812  | -3.290212095495 |
| H  | -1.282275153228 | -0.340237711193 | 3.086330342547  | C | -2.784302815590 | 2.201983424674  | -2.093834860736 |
| H  | -0.859950131126 | -0.623984449910 | 4.763375836117  | C | -2.156952212161 | 2.611422809277  | -0.943219271209 |
| H  | 1.229934255445  | -1.930836056091 | 5.278101574978  | H | -3.360156143881 | 1.275996452092  | -2.084217216453 |
| C  | -1.887294096566 | 3.627901746983  | 3.814723055737  | H | -3.166122280947 | 2.623048009185  | -4.189148948281 |
| C  | -1.802037022266 | 4.143513380844  | 2.489807809019  | H | -1.823174624113 | 4.701616540594  | -4.200102969080 |
| C  | -0.876337333520 | 3.560354067805  | 1.568490866413  | H | -0.439538776015 | 6.341739852802  | -3.027500947940 |
| H  | -1.116356773514 | 2.167214524953  | 5.205147466290  | H | -2.250161656412 | 2.018522252497  | -0.034251594165 |
| C  | 3.734620442714  | -5.015956355873 | 4.484630724825  | C | 2.112183858018  | -2.665464827146 | -0.890188477245 |
| H  | 4.466110225491  | -5.407942964769 | 5.188847891361  | C | 1.796005412061  | -4.288351791973 | -3.143405438137 |
| C  | 3.635707578216  | -5.576190879628 | 3.191991174490  | C | 2.700916300949  | -2.320889666195 | -2.081764529979 |
| H  | 4.296885632315  | -6.392173135689 | 2.906481713613  | C | 2.541265297458  | -3.137822409676 | -3.221972973302 |
| C  | 2.712073917321  | -5.100640433133 | 2.294333872285  | H | 1.671843675377  | -4.930063822341 | -4.015943387061 |
| C  | 2.913377753921  | -3.978929712481 | 4.848307218348  | H | 3.014715277100  | -2.856371948449 | -4.162143141543 |
| C  | 0.698778907721  | -4.226995901448 | 0.439222836359  | H | 3.274920143301  | -1.395830249007 | -2.142331265110 |
| C  | -0.037086487663 | -5.393872320257 | 0.486002793490  | H | 2.236244538640  | -2.023173696499 | -0.019041404470 |
| C  | 1.330694895087  | -3.841893763459 | -0.777262948858 | C | -4.013500856396 | -1.921703171973 | 0.198414121077  |
| C  | -0.177012327428 | -6.218814156724 | -0.647898498966 | C | -4.397978572937 | -2.604605763573 | -0.994731090781 |
| H  | -0.501537023117 | -5.687907130684 | 1.428214870213  | C | -4.589320942858 | -0.661616094385 | 0.507174124156  |
| C  | 1.177755511996  | -4.674643073916 | -1.928422204609 | C | -5.106177501577 | -1.876500927635 | -1.945178328438 |
| C  | 0.423944852930  | -5.868241906837 | -1.830513218725 | C | -5.249836507942 | 0.019369985170  | -0.523564137934 |
| H  | -0.766313731362 | -7.131700632450 | -0.577320217453 | C | -5.474830643448 | -0.541341938573 | -1.774087492934 |
| H  | 0.323857343840  | -6.497482879028 | -2.715150981881 | H | -5.380062223407 | -2.363438419406 | -2.876654564795 |

|   |                 |                 |                 |   |                 |                 |                 |
|---|-----------------|-----------------|-----------------|---|-----------------|-----------------|-----------------|
| H | -5.619368740991 | 1.022607150554  | -0.324899055030 | H | -3.887535794153 | 1.674587701046  | 3.018448649444  |
| C | 4.001701534485  | 1.904567501862  | 0.003360728695  | H | -2.729807228553 | 0.969291198212  | 1.869411479135  |
| C | 4.359801179440  | 2.528658353967  | -1.229814435984 | H | -4.069173322953 | 1.983054344887  | 1.279789650952  |
| C | 4.579670952265  | 0.657437084995  | 0.356496034607  | C | -4.366870750527 | -0.963976550801 | 3.074474834058  |
| C | 5.039350524382  | 1.752861889219  | -2.162841723601 | H | -4.668210699516 | -0.483293342471 | 4.015482341760  |
| C | 5.213056126837  | -0.074062330084 | -0.656893469272 | H | -4.921739475817 | -1.909922955976 | 2.995689900814  |
| C | 5.408231301563  | 0.425402215281  | -1.937631972436 | H | -3.300130444600 | -1.194201227820 | 3.185199040970  |
| H | 5.292576455557  | 2.194321300143  | -3.122345647775 | C | 2.677341763282  | 4.200992182370  | -2.131079640938 |
| H | 5.584118158556  | -1.068332594812 | -0.420103212314 | H | 2.521376474070  | 3.584867210309  | -3.026838880221 |
| C | -4.682492009967 | -0.018669083460 | 1.911443050968  | H | 1.902313659445  | 3.925763310244  | -1.405019415595 |
| C | -4.122360503402 | -4.094711808922 | -1.291490408572 | H | 2.525182750068  | 5.256334362161  | -2.400905133260 |
| C | -6.183513714128 | 0.194721251586  | -2.907237361851 | C | 5.064754433418  | 4.506082784629  | -2.660042347106 |
| C | 4.090743325304  | 4.007842483714  | -1.580946689489 | H | 4.930999341265  | 5.588699704441  | -2.784243241594 |
| C | 6.089361028924  | -0.364870131478 | -3.050983792472 | H | 6.113078437606  | 4.324564652228  | -2.384906004609 |
| C | 4.703687468253  | 0.078472777510  | 1.785818670469  | H | 4.878875450978  | 4.052729794692  | -3.641762863133 |
| C | -2.731866609335 | -4.291286838262 | -1.896707369335 | C | 4.313323084294  | 4.928966054612  | -0.373897359001 |
| H | -2.618637646163 | -3.704038726956 | -2.818187941683 | H | 5.304630294066  | 4.769758097261  | 0.073297720996  |
| H | -1.931558164280 | -3.983773796969 | -1.212264511908 | H | 4.247735008139  | 5.977413737196  | -0.696067782464 |
| H | -2.579042338613 | -5.353722126088 | -2.136801910818 | H | 3.561078718445  | 4.807431085291  | 0.416811875785  |
| C | -4.271606485637 | -4.967611296763 | -0.038476839594 | C | 3.812406533422  | -1.150395917231 | 1.969939053625  |
| H | -5.238771781770 | -4.798757448407 | 0.455646881273  | H | 2.748007869237  | -0.903274717357 | 1.831854534384  |
| H | -4.212676190637 | -6.027715225465 | -0.321557023834 | H | 4.070081830352  | -1.947536250855 | 1.257959613972  |
| H | -3.477891775456 | -4.809283287834 | 0.703695027954  | H | 3.930218168563  | -1.560902020276 | 2.984673277036  |
| C | -5.138086971224 | -4.652083331875 | -2.301453077017 | C | 4.417776165873  | 1.076061336019  | 2.912270165267  |
| H | -6.174892043435 | -4.466990979587 | -1.987780251665 | H | 4.738446765037  | 0.636167391559  | 3.866755624133  |
| H | -5.001834465437 | -4.244090845606 | -3.310709762263 | H | 4.974778646455  | 2.014604231018  | 2.778805411025  |
| H | -4.998047693231 | -5.738037658187 | -2.381500237490 | H | 3.354914192554  | 1.316838908739  | 3.036824807460  |
| C | -6.448604596741 | 1.663322257589  | -2.578594430439 | C | 6.169489750239  | -0.346546551411 | 2.006987329464  |
| H | -7.124758372685 | 1.774463961914  | -1.719447850904 | H | 6.291427162491  | -0.704368754676 | 3.038377258594  |
| H | -5.523465217326 | 2.216011135663  | -2.361502620158 | H | 6.490543299330  | -1.159271286050 | 1.346606663219  |
| H | -6.930720740354 | 2.147870627261  | -3.438434551937 | H | 6.851282709959  | 0.502250272676  | 1.858713289453  |
| C | -5.325486115233 | 0.125137988050  | -4.177403453684 | C | 6.352937083985  | -1.819247199300 | -2.663319996466 |
| H | -5.192247083597 | -0.905771795097 | -4.529816906140 | H | 7.045179913601  | -1.896962785879 | -1.813367269718 |
| H | -5.803925060865 | 0.693439076111  | -4.987584442510 | H | 5.429298779345  | -2.356334812401 | -2.404559860187 |
| H | -4.323825854836 | 0.546670739266  | -4.009495477332 | H | 6.815806217684  | -2.343756763562 | -3.510185904630 |
| C | -7.535335413074 | -0.479592830507 | -3.175717770686 | C | 7.439568921661  | 0.288549862296  | -3.374432571195 |
| H | -8.057112641146 | 0.034327294675  | -3.995833041456 | H | 7.942513934801  | -0.263613833254 | -4.181341383565 |
| H | -7.420537578956 | -1.533797479410 | -3.460434787956 | H | 7.324889037725  | 1.330222867430  | -3.702175830255 |
| H | -8.176678576121 | -0.437160487876 | -2.284211160583 | H | 8.097808734997  | 0.280680719590  | -2.494316761479 |
| C | -6.144387848798 | 0.412028115888  | 2.146865232858  | C | 5.207984192702  | -0.345786206097 | -4.306812254157 |
| H | -6.244383503674 | 0.814646880998  | 3.163991399137  | H | 4.207014252185  | -0.752483403367 | -4.102149247641 |
| H | -6.483081626842 | 1.194159639462  | 1.458882743874  | H | 5.074881650539  | 0.669136234726  | -4.702915374533 |
| H | -6.826377325899 | -0.444163437932 | 2.051616133633  | H | 5.667723734435  | -0.953049129940 | -5.099322885891 |
| C | -3.791688892019 | 1.219525535457  | 2.020453634608  |   |                 |                 |                 |

# Int-1

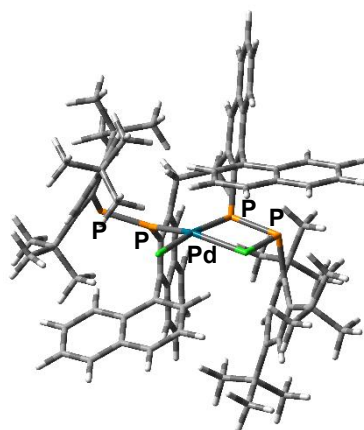

|   |                 |                 |                 |    |                 |                 |                 |
|---|-----------------|-----------------|-----------------|----|-----------------|-----------------|-----------------|
| C | 5.699675152514  | 2.725020996128  | 2.862948628800  | C  | -2.380159908777 | -2.899502929984 | -0.118869321039 |
| C | 2.249848616764  | 6.233117452596  | 0.074382342891  | P  | 1.026246310798  | -3.089636759986 | -0.399421883843 |
| C | 3.360222171064  | 2.232281425876  | 2.440405401481  | C  | -4.371666689466 | -3.947626021533 | 1.633400688506  |
| C | 2.415026032729  | 3.844765435530  | -0.325507228885 | C  | -5.264879578522 | -4.301678016200 | 3.853653808304  |
| C | 2.394908632311  | 2.493723644683  | 0.130129601778  | H  | -4.086542723215 | -3.561857736704 | 5.487049872480  |
| C | 2.232102588407  | 2.155829054485  | 1.571680502718  | C  | -2.156362840615 | -4.125391585823 | -0.816274914932 |
| C | 2.757613251357  | 1.717777585921  | -2.148013430026 | C  | -2.938688654279 | -1.829481732024 | -0.790724230667 |
| C | 2.796612147939  | 3.010962762879  | -2.606639943325 | C  | -5.363742259927 | -4.430260197637 | 2.451312426637  |
| C | 2.635210489240  | 4.099829375712  | -1.712788016816 | H  | -4.467762630323 | -4.053922092491 | 0.554749644712  |
| C | 2.674506874044  | 5.441249728908  | -2.165718042391 | H  | -6.057854348514 | -4.689334136400 | 4.490622688747  |
| C | 2.489186499368  | 6.486155943012  | -1.294093248537 | C  | -2.481138012364 | -4.200855657699 | -2.204510477267 |
| H | 2.520756675299  | 7.512283531454  | -1.655948944482 | C  | -1.625631144959 | -5.277977852311 | -0.182041110319 |
| H | 2.849706978308  | 5.626748922377  | -3.225685651157 | C  | -3.273250845566 | -1.914742335466 | -2.159032235999 |
| H | 2.951991731817  | 3.222471572205  | -3.664738472833 | H  | -3.153134731223 | -0.906880379151 | -0.246925265303 |
| C | 5.549455060797  | 2.327021521598  | 4.210164288996  | H  | -6.235067462351 | -4.914848835539 | 2.014521408631  |
| C | 4.330854756951  | 1.892400371442  | 4.667378411543  | C  | -3.046897858549 | -3.074987742863 | -2.852329529671 |
| C | 3.213475956963  | 1.828173695142  | 3.799174703707  | C  | -2.232936783228 | -5.406801763475 | -2.906221913071 |
| H | 6.404232857976  | 2.365735425057  | 4.882918561666  | C  | -1.405364583855 | -6.435320003361 | -0.886667551437 |
| H | 4.203920195762  | 1.577456597014  | 5.703189066321  | H  | -1.379050846417 | -5.228702676760 | 0.878679710813  |
| C | 1.973166427397  | 1.312649493581  | 4.231455902004  | H  | -3.695931908031 | -1.041608149772 | -2.655684717644 |
| H | 1.891569854958  | 0.942734418452  | 5.256560329876  | H  | -3.298087869126 | -3.151719056053 | -3.910423140157 |
| C | 2.217864876880  | 4.943693966104  | 0.547975099222  | C  | -1.705036504191 | -6.500116565262 | -2.265753808092 |
| H | 2.039518151077  | 4.752133783104  | 1.606262465504  | H  | -2.475796010840 | -5.448296944555 | -3.968300081146 |
| C | 4.631071382324  | 2.683998336662  | 2.001522065627  | H  | -0.994061214663 | -7.308007737309 | -0.382427720974 |
| H | 4.753540743603  | 3.000172803876  | 0.966802829807  | H  | -1.520554688220 | -7.420941791737 | -2.816311582696 |
| H | 2.095096761401  | 7.066264302187  | 0.757822966907  | C  | -0.014664248108 | -1.084566296414 | 4.039218128240  |
| H | 6.669168201827  | 3.068371849223  | 2.505568568034  | H  | -0.007777066761 | -1.330563275689 | 5.109094053584  |
| C | 1.016564139041  | 1.686958629520  | 2.051155546798  | H  | 0.995769201800  | -1.299904188983 | 3.673105590918  |
| C | 2.571894293567  | 1.463708990859  | -0.772035448163 | P  | 0.396988918051  | -1.408655573196 | 1.021927435779  |
| P | -1.480167673914 | 3.319568609093  | 1.443973680585  | P  | -0.419695836098 | 1.659563865831  | 0.897973689099  |
| C | 0.892678073245  | 1.200163355705  | 3.388463866913  | Pd | -0.496097705510 | -0.019258836646 | -0.649114465197 |
| H | 2.874169251533  | 0.876331235520  | -2.832550463024 | Cl | -1.258294474483 | 1.206396933003  | -2.631469360196 |
| H | 2.586989085329  | 0.433946882047  | -0.408709228200 | Cl | 0.266962175859  | -1.914191421027 | -2.104746186851 |
| C | -1.044483164093 | -1.945320396806 | 3.354937470183  | C  | -0.312046411646 | 0.433927746082  | 3.865729723626  |
| C | -2.043325274583 | -2.473511460004 | 4.134390785665  | H  | -1.150684941307 | 0.556947362473  | 3.167281928461  |
| C | -1.074219187164 | -2.139807765248 | 1.925366556883  | H  | -0.663429869970 | 0.843871443712  | 4.823292611599  |
| C | -3.139833901981 | -3.169879799087 | 3.586115980716  | C  | -2.991763131422 | 3.182554395288  | 0.387330532243  |
| H | -2.009922074424 | -2.330021073460 | 5.216203206524  | C  | -4.001511308741 | 2.242108268347  | 0.716749772455  |
| C | -2.168673772285 | -2.789045727867 | 1.352626779743  | C  | -3.069050704976 | 3.909042355485  | -0.838833324488 |
| C | -3.222152629144 | -3.310624858359 | 2.173513346362  | C  | -4.867631457720 | 1.834526172692  | -0.306163294382 |
| C | -4.173651189034 | -3.680922512802 | 4.406987583464  | C  | -4.006157171551 | 3.485003835211  | -1.775806667549 |

|   |                 |                 |                 |   |                 |                 |                 |
|---|-----------------|-----------------|-----------------|---|-----------------|-----------------|-----------------|
| C | -4.859708848560 | 2.400152353915  | -1.572860311911 | C | -4.970430182460 | 1.646251273464  | -3.955203343538 |
| H | -5.589629522871 | 1.052342662436  | -0.086086443124 | H | -4.440197070185 | 2.534561038443  | -4.322732757451 |
| H | -4.059837478892 | 4.000757736727  | -2.730287275755 | H | -4.214396293663 | 0.870247155506  | -3.766572278418 |
| C | 2.827613276924  | -2.666227947653 | -0.667396778742 | H | -5.633755177522 | 1.297382390080  | -4.759556993713 |
| C | 3.665433704345  | -2.185975402809 | 0.380257686666  | C | -6.801869403773 | 3.052499333916  | -2.991743859486 |
| C | 3.340164880666  | -2.649564345813 | -1.996348032589 | H | -7.480616898307 | 2.739855593435  | -3.798454233242 |
| C | 4.737647786633  | -1.362801915501 | 0.038130188833  | H | -7.409014079019 | 3.277931463386  | -2.103610964151 |
| C | 4.418145773363  | -1.797893029711 | -2.263327039043 | H | -6.308965798355 | 3.981060051112  | -3.309160944305 |
| C | 5.084099325572  | -1.072642794499 | -1.280902226505 | C | 6.192097006784  | 1.132119739971  | -0.771479243729 |
| H | 5.353823069868  | -0.958521431136 | 0.841073309030  | H | 7.077105559904  | 1.752267744898  | -0.974346297361 |
| H | 4.770318701143  | -1.728375469844 | -3.290106202008 | H | 5.297888478309  | 1.718405616700  | -1.033928483967 |
| C | 2.975543297843  | -3.621051815759 | -3.148465689818 | H | 6.165374282572  | 0.942656596556  | 0.309886256747  |
| C | 3.652518531898  | -2.692241807067 | 1.837106779800  | C | 7.555969646133  | -0.910989680077 | -1.236933794654 |
| C | 6.266127838721  | -0.158791405971 | -1.592786799260 | H | 8.435005515226  | -0.288654259330 | -1.459337486136 |
| C | -2.205675000767 | 5.141955632151  | -1.185902274698 | H | 7.589368868368  | -1.175933052053 | -0.170861298650 |
| C | -4.327936451891 | 1.684131574287  | 2.122480581962  | H | 7.638584048124  | -1.840014558069 | -1.818976080400 |
| C | -5.788202260003 | 1.941054158699  | -2.692146261093 | C | 6.325248728259  | 0.231701548462  | -3.069550376727 |
| C | -2.064346195623 | 6.090782076299  | 0.011714954217  | H | 6.511466369150  | -0.630447977530 | -3.724038333339 |
| H | -1.536407679885 | 7.002174760430  | -0.302903109694 | H | 5.395681804464  | 0.720555458375  | -3.395665877902 |
| H | -3.047553707988 | 6.383417742641  | 0.406382251276  | H | 7.149887040568  | 0.940186822445  | -3.227095719090 |
| H | -1.477354421393 | 5.669910458146  | 0.838590422879  | C | 4.966921769954  | -3.480574826836 | 2.015795004056  |
| C | -0.820877075425 | 4.730368615306  | -1.694547791257 | H | 5.025483421797  | -3.876408892962 | 3.039932334217  |
| H | -0.222510333342 | 4.224994695560  | -0.925634413552 | H | 5.010276981633  | -4.329520834912 | 1.318606047268  |
| H | -0.907811246256 | 4.042301853989  | -2.547020173813 | H | 5.854074081780  | -2.858553940492 | 1.845510920355  |
| H | -0.258849631797 | 5.621403070018  | -2.011901272926 | C | 2.546118956996  | -3.697323678959 | 2.168530977143  |
| C | -2.854296121749 | 5.979501888180  | -2.298364109855 | H | 2.505862434128  | -4.516126417496 | 1.433657964591  |
| H | -2.841595187596 | 5.471845432680  | -3.271284059635 | H | 2.760192733609  | -4.159797639408 | 3.142171847586  |
| H | -3.892244196391 | 6.250629599407  | -2.059817838032 | H | 1.547281561296  | -3.252971030765 | 2.268136709639  |
| H | -2.282666263434 | 6.908998518611  | -2.420156898802 | C | 3.630747487512  | -1.538430693125 | 2.843104260715  |
| C | -4.014984785734 | 0.187127216466  | 2.203189700504  | H | 3.565938147077  | -1.927113146820 | 3.870849429493  |
| H | -4.622730887900 | -0.391876470058 | 1.492841650258  | H | 4.539537675497  | -0.923096773644 | 2.785575418062  |
| H | -2.956829029033 | -0.023074283810 | 1.984444325878  | H | 2.772285211708  | -0.877172902721 | 2.669178803798  |
| H | -4.230505289632 | -0.197762820551 | 3.211776555948  | C | 4.264794495400  | -4.429447117165 | -3.417346799509 |
| C | -3.643931642298 | 2.402518477095  | 3.289410635056  | H | 4.080071924547  | -5.163431473835 | -4.214222415196 |
| H | -3.765930860382 | 3.493464625357  | 3.226083705402  | H | 5.102893382142  | -3.798540509081 | -3.734464040564 |
| H | -4.111178150763 | 2.075856175095  | 4.229040416000  | H | 4.575163730595  | -4.976124763131 | -2.515649160215 |
| H | -2.576324320888 | 2.175660866355  | 3.389808939625  | C | 2.587192516095  | -2.890676754537 | -4.439116284116 |
| C | -5.835373045620 | 1.884925209568  | 2.378919534095  | H | 2.423199201918  | -3.624465443691 | -5.241086425299 |
| H | -6.473300959876 | 1.338118811146  | 1.676308238053  | H | 1.664021835499  | -2.311126278025 | -4.318286812594 |
| H | -6.084160801670 | 1.525890664790  | 3.387047376742  | H | 3.373406313684  | -2.205288198395 | -4.780317852194 |
| H | -6.102813612472 | 2.949335422284  | 2.322118235005  | C | 1.914527069659  | -4.683426483250 | -2.839454907680 |
| C | -6.562600344969 | 0.677311143649  | -2.321585042100 | H | 2.141201328223  | -5.231828657956 | -1.914375677644 |
| H | -7.176096095946 | 0.358968376186  | -3.175275883198 | H | 0.888286448107  | -4.300222465525 | -2.782981845730 |
| H | -5.890930435301 | -0.155180123175 | -2.064053504985 | H | 1.914377807460  | -5.418794769550 | -3.656476217133 |
| H | -7.241855487673 | 0.843201448081  | -1.473761752699 |   |                 |                 |                 |

## Int-2

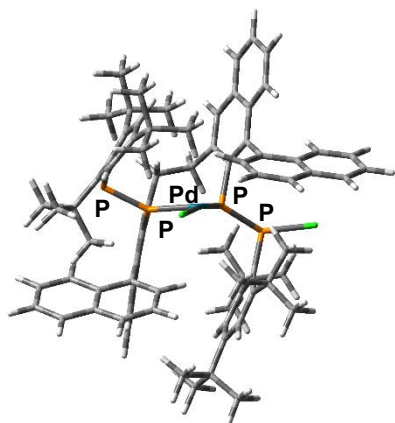

|    |                |                 |                 |    |                 |                 |                 |
|----|----------------|-----------------|-----------------|----|-----------------|-----------------|-----------------|
| C  | 2.954825376709 | -2.428823508091 | -0.715419397193 | P  | -1.220505506723 | 3.072640064489  | 1.718771906701  |
| C  | 4.125791688508 | -2.250151073442 | 0.101438995521  | C  | 1.164598031316  | 0.567638817331  | 3.080214385600  |
| C  | 2.912067915606 | -1.859689579843 | -2.024224854693 | H  | 2.406899338261  | 2.129606845182  | -3.290929698779 |
| C  | 5.112519302994 | -1.373309294529 | -0.354882618138 | H  | 2.357883109304  | 0.836338024581  | -1.164017875163 |
| C  | 3.985488240923 | -1.044730675699 | -2.405202787887 | C  | -1.104746520060 | -2.346259201992 | 2.988643565073  |
| C  | 5.074081239179 | -0.754581464089 | -1.597353875319 | C  | -2.140684356325 | -2.849437324998 | 3.735625997119  |
| H  | 5.973455223725 | -1.186247374632 | 0.271786945819  | C  | -1.186573145483 | -2.407189892695 | 1.557938367810  |
| H  | 3.966179530795 | -0.602976402346 | -3.398506931948 | C  | -3.310010529125 | -3.375253385239 | 3.140511895446  |
| C  | 1.877495202359 | -2.020752676222 | -3.175640233685 | H  | -2.083559816369 | -2.816060975584 | 4.825372491444  |
| C  | 4.462009047337 | -3.022617812958 | 1.412217372340  | C  | -2.320214292617 | -2.918877500217 | 0.939171290205  |
| C  | 6.212800404612 | 0.117435099444  | -2.120256223884 | C  | -3.417722903918 | -3.396973234959 | 1.721162906291  |
| P  | 1.559038305619 | -3.241885425879 | 0.198799908164  | C  | -4.393965805332 | -3.834356846737 | 3.926809436440  |
| Cl | 1.244973911790 | -5.175341091199 | -0.744301279882 | C  | -2.442047733328 | -2.948318024595 | -0.544273397884 |
| C  | 6.026891058636 | 1.800610034544  | 2.315287549683  | C  | -4.626895234988 | -3.860507742844 | 1.141488868478  |
| C  | 2.515389354250 | 6.095015910623  | 1.357553314369  | C  | -5.548224248027 | -4.284659310708 | 3.336267730950  |
| C  | 3.619308791049 | 1.594018061504  | 2.079403509757  | H  | -4.295219529109 | -3.812771532023 | 5.012092635680  |
| C  | 2.515832812730 | 3.996919672973  | 0.134898121135  | C  | -2.310814991668 | -4.177493540930 | -1.256101437002 |
| C  | 2.437044726711 | 2.570604491482  | 0.086946353948  | C  | -2.785758331571 | -1.792533161278 | -1.240227187570 |
| C  | 2.406767253512 | 1.790465129254  | 1.353728011489  | C  | -5.665667004514 | -4.292117654503 | 1.929511776490  |
| C  | 2.450756238253 | 2.659895846067  | -2.340679304461 | H  | -4.730870385171 | -3.869341926599 | 0.057570276378  |
| C  | 2.578515732055 | 4.024292164164  | -2.318733410557 | H  | -6.378266373295 | -4.630277778581 | 3.949654939185  |
| C  | 2.614267398620 | 4.724484098985  | -1.087984156625 | C  | -2.478287408053 | -4.178220739466 | -2.674919634395 |
| C  | 2.692968022254 | 6.1374443933004 | -1.046967055748 | C  | -2.052116177961 | -5.409096177675 | -0.602988041371 |
| C  | 2.639955315112 | 6.811739604849  | 0.147943374923  | C  | -2.958770511770 | -1.806357663419 | -2.648494566646 |
| H  | 2.688768796075 | 7.898950692730  | 0.166433585677  | H  | -3.100913487085 | -0.906041253618 | -0.675320280644 |
| H  | 2.774951418240 | 6.680457514677  | -1.988977309237 | H  | -6.587093361394 | -4.640813022846 | 1.467017400104  |
| H  | 2.635327449205 | 4.593608574682  | -3.246632867329 | C  | -2.792679270733 | -2.970598634460 | -3.347461435158 |
| C  | 5.971241795332 | 1.131610190267  | 3.558940246840  | C  | -2.338064309381 | -5.394325920782 | -3.383899868933 |
| C  | 4.765503109778 | 0.706580508480  | 4.057694531022  | C  | -1.959319632366 | -6.578449763702 | -1.314507597458 |
| C  | 3.566316584146 | 0.925761522054  | 3.335735496602  | H  | -1.917422749688 | -5.417759791459 | 0.477725776586  |
| H  | 6.888080735755 | 0.955125762520  | 4.118301365687  | H  | -3.213851137459 | -0.876037622460 | -3.152265131580 |
| H  | 4.709897372975 | 0.181719416133  | 5.011775205228  | H  | -2.915716664228 | -2.992936148075 | -4.430360392619 |
| C  | 2.324322359701 | 0.449347097290  | 3.809088033399  | C  | -2.088448328794 | -6.570322741097 | -2.719935294932 |
| H  | 2.303512134162 | -0.083132099985 | 4.763503340465  | H  | -2.447473393968 | -5.379566148736 | -4.468296885873 |
| C  | 2.464488141250 | 4.721533318179  | 1.352338294538  | H  | -1.763187763615 | -7.514991528309 | -0.795989275047 |
| H  | 2.373606600576 | 4.176845518519  | 2.291767318512  | H  | -1.994167143931 | -7.501368165510 | -3.275923456488 |
| C  | 4.880089290809 | 2.028725237971  | 1.594652142217  | C  | 0.039714023513  | -1.656758626902 | 3.681036325592  |
| H  | 4.932300998055 | 2.546720612321  | 0.637166526105  | H  | 0.057115866939  | -1.969295761888 | 4.733266626928  |
| H  | 2.463815459342 | 6.635167144228  | 2.301247303841  | H  | 0.999053698070  | -1.969607558784 | 3.250039691905  |
| H  | 6.986581527638 | 2.140409322360  | 1.928773737674  | P  | 0.183831932349  | -1.626393206421 | 0.587636411901  |
| C  | 1.211405911758 | 1.277905504048  | 1.839543325884  | P  | -0.289823957737 | 1.497928303039  | 0.791664402415  |
| C  | 2.402738052549 | 1.928518580306  | -1.132936001569 | Pd | -0.906401756773 | -0.090270543427 | -0.803406586710 |

|    |                 |                 |                 |   |                 |                 |                 |
|----|-----------------|-----------------|-----------------|---|-----------------|-----------------|-----------------|
| Cl | -1.788698913231 | 1.456779497577  | -2.505749212882 | H | 3.398351682378  | -1.563749506299 | 2.634747937214  |
| C  | -0.079285143027 | -0.108176056470 | 3.597330586708  | H | 2.591765683851  | -3.145554138766 | 2.572675091827  |
| H  | -0.941736496742 | 0.149860802992  | 2.969529140297  | H | 4.054783377463  | -2.939005916691 | 3.544929391688  |
| H  | -0.319733937808 | 0.286694490791  | 4.595456624336  | C | 5.895188087890  | -2.733144443275 | 1.890656024458  |
| C  | -2.822728448973 | 3.251397527853  | 0.817511064693  | H | 6.103644090131  | -3.375888038690 | 2.755683032115  |
| C  | -3.894696300868 | 2.355544530756  | 1.091066178588  | H | 6.652701248626  | -2.956490706918 | 1.127522607782  |
| C  | -2.935714591025 | 4.177658332534  | -0.256879358430 | H | 6.022049063196  | -1.692571249613 | 2.225379513703  |
| C  | -4.874143108577 | 2.206559154213  | 0.110470579956  | C | -2.668449960946 | 6.455268887237  | -1.353841049928 |
| C  | -3.977098304782 | 3.988289316617  | -1.168140605767 | H | -2.807859426002 | 6.141514250733  | -2.396016425144 |
| C  | -4.901045157177 | 2.956484876352  | -1.060645613394 | H | -3.644082644857 | 6.755167986114  | -0.946965446993 |
| H  | -5.654788408872 | 1.464151575547  | 0.265806624809  | H | -2.024779861987 | 7.344503728370  | -1.376859704837 |
| H  | -4.040931684023 | 4.650513719356  | -2.024282558731 | C | -0.726779452459 | 4.942486894955  | -1.236507361412 |
| C  | -1.992353091336 | 5.376929460822  | -0.492373664404 | H | -0.106131347799 | 4.255807274960  | -0.646850011567 |
| C  | -4.133804664941 | 1.564205096992  | 2.396126214454  | H | -0.982653372469 | 4.432523439955  | -2.176412739198 |
| C  | -5.936476344250 | 2.647143585392  | -2.135469682653 | H | -0.108574799951 | 5.822702821309  | -1.469939971139 |
| C  | 1.299907724741  | -0.643807787923 | -3.527895282607 | C | -1.618540471726 | 6.079971897150  | 0.819063138424  |
| H  | 2.065317788012  | 0.077495482777  | -3.840991357586 | H | -1.035041642699 | 6.984690965957  | 0.597040459101  |
| H  | 0.578503112324  | -0.737352612055 | -4.352926941808 | H | -2.515995288979 | 6.379693275770  | 1.378363088827  |
| H  | 0.757158040202  | -0.207969509935 | -2.670846188673 | H | -0.991872943387 | 5.470161078377  | 1.482722728271  |
| C  | 0.686057193933  | -2.949475242670 | -2.971730917838 | C | -5.782573002832 | 3.540285550768  | -3.364486093808 |
| H  | 0.987045107012  | -3.997954623015 | -2.904096511339 | H | -5.944539898708 | 4.600805257218  | -3.126027391714 |
| H  | 0.076763033763  | -2.704351622049 | -2.094888856649 | H | -4.787157434286 | 3.436557040801  | -3.819622806905 |
| H  | 0.030526053323  | -2.856769739008 | -3.848922741689 | H | -6.526728793273 | 3.255395909199  | -4.120751652101 |
| C  | 2.614639462898  | -2.597185534574 | -4.400976937105 | C | -7.348725224771 | 2.843119874759  | -1.572298940682 |
| H  | 3.058879694183  | -3.572348865179 | -4.156937200442 | H | -7.544801304742 | 2.191226144140  | -0.710488484004 |
| H  | 1.896287865571  | -2.749329320018 | -5.218777445338 | H | -7.501047273437 | 3.883057543596  | -1.250547091206 |
| H  | 3.411947448661  | -1.949316903993 | -4.783546094737 | H | -8.098760529652 | 2.612129552575  | -2.342451325934 |
| C  | 5.681536001762  | 1.486087366592  | -2.554826791330 | C | -5.755145996635 | 1.190701442772  | -2.583963098242 |
| H  | 4.927535514532  | 1.407537597281  | -3.349543824403 | H | -4.740381246237 | 1.037096278032  | -2.980556054464 |
| H  | 5.218718188965  | 2.020070815319  | -1.711700271546 | H | -5.905861434393 | 0.482066867937  | -1.757571038646 |
| H  | 6.505961811927  | 2.103310820700  | -2.939419070018 | H | -6.480403003264 | 0.943468197649  | -3.372771167026 |
| C  | 6.849986987121  | -0.585154428684 | -3.326594043338 | C | -3.309543796542 | 2.031616889447  | 3.598871848897  |
| H  | 7.683668088555  | 0.016263483268  | -3.716735173278 | H | -3.385554654852 | 3.118537127651  | 3.746778013553  |
| H  | 7.244167341029  | -1.570709990960 | -3.041769887165 | H | -3.695774044155 | 1.547724834393  | 4.506945186096  |
| H  | 6.131431940819  | -0.732077216860 | -4.144297300102 | H | -2.248257060891 | 1.762202259342  | 3.544319640614  |
| C  | 7.301196031157  | 0.342796957387  | -1.072515375851 | C | -3.890774349990 | 0.070335307849  | 2.161996199854  |
| H  | 7.787342192679  | -0.596703608526 | -0.773936469532 | H | -4.578467270019 | -0.333844010026 | 1.404376171484  |
| H  | 8.078674265718  | 0.998108175681  | -1.487830872285 | H | -2.864658828695 | -0.125291478808 | 1.814659254775  |
| H  | 6.901913498638  | 0.825649990803  | -0.168679666495 | H | -4.046453351898 | -0.499082663038 | 3.091382284970  |
| C  | 4.417137353560  | -4.534739714118 | 1.152013464667  | C | -5.598921407671 | 1.761896792988  | 2.832615437078  |
| H  | 3.421511984607  | -4.902776410877 | 0.881585677357  | H | -6.326182671769 | 1.367364317408  | 2.114643809505  |
| H  | 5.109640832696  | -4.809911457559 | 0.343912325692  | H | -5.769122862559 | 1.236475010804  | 3.782302362545  |
| H  | 4.723870956916  | -5.073183532348 | 2.060066758349  | H | -5.820390286758 | 2.826737393613  | 2.989640996588  |
| C  | 3.565869720198  | -2.648426508299 | 2.603416649847  |   |                 |                 |                 |

### Int-3A

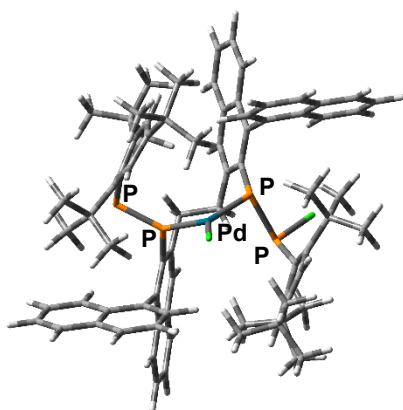

|   |                 |                 |                 |    |                 |                 |                 |
|---|-----------------|-----------------|-----------------|----|-----------------|-----------------|-----------------|
| C | -4.723735464187 | 4.036580826527  | 3.956848957755  | C  | 4.982636205976  | -4.391282395430 | -0.153622746095 |
| C | -7.328402995716 | 0.079630094777  | 0.788102865228  | H  | 4.763271190569  | -2.888796031761 | -1.655839935374 |
| C | -3.648688854120 | 2.385051210637  | 2.539311952597  | H  | 5.023508993489  | -5.764117404632 | 1.524966183620  |
| C | -5.608625761497 | 1.620330473116  | 0.034536427614  | H  | 5.666065538603  | -4.989201657385 | -0.753561419240 |
| C | -4.306213944355 | 2.200805403124  | 0.140021907247  | C  | 3.506986364161  | -0.718058018050 | -1.713293950148 |
| C | -3.424814658295 | 1.779529762973  | 1.267114051610  | C  | 4.758809054111  | -0.025819115372 | -1.753176458195 |
| C | -4.778347427550 | 3.596411670417  | -1.790339820831 | C  | 2.845049567681  | -1.001703831663 | -2.889402955757 |
| C | -6.027695411488 | 3.044203151462  | -1.918654314166 | C  | 5.303231015135  | 0.345707677210  | -3.017874087549 |
| C | -6.470825067690 | 2.046498379025  | -1.019083508143 | C  | 5.486136549912  | 0.303715082468  | -0.580528293070 |
| C | -7.753427017754 | 1.457603728055  | -1.145214587751 | C  | 3.389795507302  | -0.626741420891 | -4.137613266967 |
| C | -8.175518886004 | 0.494329457780  | -0.263251059852 | H  | 1.890323540937  | -1.534005034394 | -2.858039129733 |
| H | -9.163271172743 | 0.049491835184  | -0.369087578479 | C  | 6.541901468544  | 1.030563199025  | -3.063946300129 |
| H | -8.399279533708 | 1.789815683995  | -1.958361405287 | C  | 4.594560721418  | 0.02309992425   | -4.200333434176 |
| H | -6.696862257205 | 3.363488355069  | -2.717844813352 | C  | 6.686841879657  | 0.967661092556  | -0.658110224820 |
| C | -3.988069129215 | 3.570942018976  | 5.069122545195  | H  | 5.080744027850  | 0.027365836513  | 0.392501728475  |
| C | -3.108658183650 | 2.526556273088  | 4.926149710574  | H  | 2.848654151309  | -0.864848777269 | -5.050789677583 |
| C | -2.919203700129 | 1.912034169119  | 3.665487378428  | C  | 7.222740588988  | 1.334875490799  | -1.911184458817 |
| H | -4.123591655133 | 4.042034934066  | 6.040881329486  | H  | 6.943289474709  | 1.311149130986  | -4.038214330475 |
| H | -2.538200841089 | 2.156682055388  | 5.778014346425  | H  | 5.022983267118  | 0.309554384390  | -5.161181138785 |
| C | -2.008674548160 | 0.848376475297  | 3.489265927335  | H  | 7.229518036864  | 1.212705759639  | 0.253137956211  |
| H | -1.461215347054 | 0.485953043711  | 4.362587690667  | H  | 8.174858829157  | 1.860208032865  | -1.959286767516 |
| C | -6.078485572651 | 0.629348120988  | 0.934529445184  | P  | 1.301802185652  | 0.977709196889  | -0.384973178260 |
| H | -5.431510177682 | 0.296513547293  | 1.745652961683  | P  | 2.307372129523  | 2.605459489019  | 0.350794628384  |
| C | -4.565225207032 | 3.453664628257  | 2.723972297096  | C  | 1.756156913170  | -0.941471318901 | 1.687550265028  |
| H | -5.132546036534 | 3.821283532584  | 1.870576924266  | C  | 0.730028753005  | -0.222525116723 | 2.512325678525  |
| H | -7.669697109401 | -0.682387361021 | 1.486468728021  | H  | 0.767808588973  | 0.855741681842  | 2.322261507498  |
| H | -5.421237263999 | 4.862785684213  | 4.079871126231  | H  | 0.946773542307  | -0.355809090296 | 3.580773938985  |
| C | -2.469500895139 | 0.770178661303  | 1.114936557490  | C  | -0.678181827524 | -0.757490186754 | 2.179479744913  |
| C | -3.916514723134 | 3.176189612619  | -0.754851803566 | H  | -0.914212485869 | -1.597443681423 | 2.850363721316  |
| C | -1.754264876873 | 0.287072414621  | 2.261808875877  | H  | -0.640033464752 | -1.194094764870 | 1.178470281728  |
| H | -4.449312994695 | 4.362994166834  | -2.490301933967 | P  | -2.224740203381 | 0.264215215411  | -0.644418375438 |
| H | -2.917861170775 | 3.614102276094  | -0.663434664330 | Pd | -0.409154357553 | 0.877827002432  | -1.874012001726 |
| C | 2.322316381797  | -2.094276321579 | 2.172667952160  | Cl | -0.259359955359 | 1.312993894221  | -4.265357341712 |
| C | 2.097939989828  | -0.503807099839 | 0.366653419460  | P  | -2.008683636428 | -1.967080149223 | -0.576215594888 |
| C | 3.216810729992  | -2.873040905761 | 1.405589826794  | C  | 1.395650069400  | 3.971338826451  | -0.515374785799 |
| H | 2.067104984952  | -2.431034562692 | 3.179662618541  | C  | 0.250594647577  | 4.581541811790  | 0.079825132731  |
| C | 3.013953866783  | -1.214336894806 | -0.399171637892 | C  | 1.751450870949  | 4.299293057291  | -1.848812955403 |
| C | 3.578469162851  | -2.427345099020 | 0.102971812182  | C  | -0.628514616382 | 5.266029280777  | -0.761601635898 |
| C | 3.755640721205  | -4.084630664286 | 1.901090127260  | C  | 0.792140046892  | 4.948559125898  | -2.632241979845 |
| C | 4.481018199315  | -3.216347913642 | -0.656608787052 | C  | -0.422731921357 | 5.397228707028  | -2.134950345912 |
| C | 4.617680636049  | -4.831384148343 | 1.137579496419  | H  | -1.510679626842 | 5.724279424872  | -0.329808256870 |
| H | 3.467414076371  | -4.413073415142 | 2.899596941417  | H  | 1.015079023509  | 5.111416135506  | -3.684942135144 |



|    |                 |                 |                 |   |                 |                 |                 |
|----|-----------------|-----------------|-----------------|---|-----------------|-----------------|-----------------|
| C  | 3.130260050758  | 4.115113605689  | -2.520890255675 | H | -6.129585697417 | -0.961217265303 | -1.952229160157 |
| C  | 0.040634741481  | 4.714705368829  | 1.604771635869  | C | -5.324768904900 | -1.972916873030 | -4.205194755666 |
| Cl | -3.601469685149 | -2.521802114100 | 0.746339730719  | H | -5.011593230874 | -1.886917060553 | -5.252146528270 |
| C  | -2.261549927047 | -2.468820334969 | -2.327702738890 | H | -5.340233305210 | -3.039956814998 | -3.942050459846 |
| C  | -3.012231532463 | -1.803264002227 | -3.340119779963 | H | -6.353152534237 | -1.591507221025 | -4.134714309484 |
| C  | -1.176180604980 | -3.332716312819 | -2.715609522897 | C | 0.827544119393  | -3.918680138989 | -1.251547433527 |
| C  | -2.488192950785 | -1.795482371910 | -4.637035357148 | H | 0.695327354692  | -3.037396532441 | -0.607469762261 |
| C  | -0.714524021419 | -3.243421237576 | -4.025378126574 | H | 1.298822196174  | -4.710559426787 | -0.648758378273 |
| C  | -1.315608601165 | -2.442616157953 | -4.995642735159 | H | 1.531086429770  | -3.652218764405 | -2.054397836603 |
| H  | -3.030306608266 | -1.245179269272 | -5.400616813847 | C | -0.201869813574 | -5.658500222351 | -2.690845700955 |
| H  | 0.147345579741  | -3.838165021082 | -4.316035464112 | H | 0.170379951590  | -6.460451514351 | -2.039903096971 |
| C  | -4.421680317144 | -1.183688383169 | -3.234686056768 | H | -1.106219572501 | -6.024362059665 | -3.196372090028 |
| C  | -0.503259350159 | -4.415871007070 | -1.827999810293 | H | 0.571141892407  | -5.490627223825 | -3.449051762757 |
| C  | 1.162630427547  | 5.619762392856  | 2.135836746156  | C | -1.400340425940 | -4.937969842212 | -0.694600837795 |
| H  | 2.155647975701  | 5.179416612586  | 1.967690800271  | H | -1.451261634874 | -4.268385749236 | 0.169876621327  |
| H  | 1.141185407969  | 6.601242321960  | 1.641988020080  | H | -2.424081012864 | -5.131195879488 | -1.044907038013 |
| H  | 1.042291224388  | 5.777114560239  | 3.217569456567  | H | -0.990870660158 | -5.886265944172 | -0.321255304296 |
| C  | 0.060088182024  | 3.396056790831  | 2.376236333701  | C | -1.445850074985 | 6.033901949351  | -3.069854456087 |
| H  | -0.611386732152 | 2.655364940943  | 1.921972372884  | C | -1.976720081686 | 4.942997393735  | -4.009409963196 |
| H  | 1.064594330675  | 2.958680435144  | 2.447520029415  | H | -1.176735816509 | 4.523341549900  | -4.634704666618 |
| H  | -0.276261685191 | 3.566326687780  | 3.409483938234  | H | -2.414990678141 | 4.106648156337  | -3.442866550502 |
| C  | -1.295330621768 | 5.383478611333  | 1.953888323635  | H | -2.751539923331 | 5.352706616323  | -4.674496895008 |
| H  | -1.390067863309 | 5.440599748048  | 3.046931718662  | C | -2.618661682901 | 6.655118584194  | -2.312836105365 |
| H  | -1.369942494917 | 6.408916764487  | 1.569820012857  | H | -2.288487831826 | 7.470155969076  | -1.653214526060 |
| H  | -2.155673267835 | 4.804781111057  | 1.583534177204  | H | -3.336777424795 | 7.076420348349  | -3.029674076802 |
| C  | 3.044220806180  | 3.117159196265  | -3.677585973162 | H | -3.160313976528 | 5.923620682979  | -1.697607164630 |
| H  | 2.753607808773  | 2.118300849212  | -3.322714872168 | C | -0.796370387037 | 7.146120817204  | -3.902150208487 |
| H  | 2.311149103038  | 3.426740704573  | -4.434325896489 | H | -1.547037560491 | 7.607431891785  | -4.559419929298 |
| H  | 4.024722702788  | 3.029161079857  | -4.169553901725 | H | -0.383767310139 | 7.931874126475  | -3.253987323745 |
| C  | 4.268341413162  | 3.686057445753  | -1.593654779101 | H | 0.013857890627  | 6.774176291686  | -4.542217523031 |
| H  | 4.230594319098  | 2.625646904249  | -1.313974839219 | C | -0.728268837874 | -2.379849471823 | -6.399848644800 |
| H  | 5.223606090908  | 3.817338907560  | -2.122218907154 | C | 0.722900637519  | -1.895993883685 | -6.311350425151 |
| H  | 4.314704935251  | 4.299850145551  | -0.681598626955 | H | 0.760101768436  | -0.892256411610 | -5.861671641649 |
| C  | 3.562796508842  | 5.489940171657  | -3.070335458293 | H | 1.345216739070  | -2.570391059103 | -5.706064688937 |
| H  | 2.878918327104  | 5.892722345621  | -3.826058387771 | H | 1.167410148581  | -1.845224493968 | -7.315817628477 |
| H  | 3.641252727004  | 6.227153981554  | -2.258733227686 | C | -1.492904696582 | -1.422380694337 | -7.311568673481 |
| H  | 4.551096954260  | 5.398352620234  | -3.541619255104 | H | -2.530785119419 | -1.746596555800 | -7.471465552688 |
| C  | -4.425027366805 | 0.293892057801  | -3.648142792148 | H | -1.505333413572 | -0.399514457766 | -6.909226460065 |
| H  | -5.453811797446 | 0.682399380790  | -3.611553922168 | H | -1.005422996155 | -1.389243377035 | -8.295367168088 |
| H  | -3.817375650601 | 0.904861374392  | -2.965308906622 | C | -0.769717807127 | -3.778678537137 | -7.027956754152 |
| H  | -4.046243890988 | 0.446196243807  | -4.667392767916 | H | -1.803368837968 | -4.145262874038 | -7.100281632019 |
| C  | -5.089857950774 | -1.310271446317 | -1.874257471321 | H | -0.347952324988 | -3.747236266868 | -8.042712338048 |
| H  | -5.106652139680 | -2.349932759543 | -1.523896295258 | H | -0.191216616287 | -4.510123829007 | -6.448014411711 |
| H  | -4.619183377577 | -0.691301798968 | -1.102144424730 |   |                 |                 |                 |

Int-3B

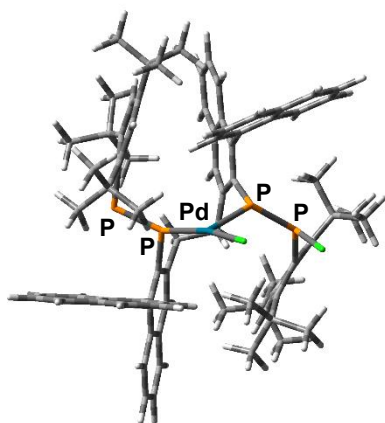

|    |                 |                 |                 |   |                 |                 |                 |
|----|-----------------|-----------------|-----------------|---|-----------------|-----------------|-----------------|
| C  | -3.399363698450 | 1.386136722853  | 1.391684591286  | H | -1.619849647727 | 6.126090437163  | -3.347581529980 |
| C  | -3.755800587967 | 0.329242782670  | 2.291763410384  | C | 5.371795358266  | 5.166279758255  | 0.997880931455  |
| C  | -4.233565958983 | 1.666401214787  | 0.277077806034  | C | 4.945730921630  | 4.045576019723  | 1.666038122581  |
| C  | -4.761798432440 | -0.545950837493 | 1.891638082537  | C | 3.660726488618  | 3.504016699910  | 1.421246311346  |
| C  | -5.225723795423 | 0.730276131652  | -0.050527273080 | H | 6.364554883409  | 5.571009923350  | 1.185550648295  |
| C  | -5.482838770507 | -0.403269837738 | 0.706331587689  | H | 5.592407720016  | 3.548341659549  | 2.389727479872  |
| H  | -5.023002293592 | -1.375372085135 | 2.540386295006  | C | 3.226808255295  | 2.321312275030  | 2.060494342876  |
| H  | -5.833412689409 | 0.912485797637  | -0.931050341602 | H | 3.896011283200  | 1.838611985897  | 2.774894601958  |
| C  | 3.813879609321  | -1.943875160593 | -0.928678660926 | C | -0.309316968570 | 5.746570136208  | 1.053185213564  |
| C  | 4.217269860619  | -3.035001469937 | -0.095898801940 | H | 0.305068177858  | 5.238686590739  | 1.796357082524  |
| C  | 4.476998971226  | -0.675506164763 | -0.817153095994 | C | 3.264625014412  | 5.305601296647  | -0.181739463000 |
| C  | 5.088337683933  | -2.753265434350 | 0.964825165459  | H | 2.614666194112  | 5.803285136369  | -0.899712155070 |
| C  | 5.335415500357  | -0.498075293014 | 0.262780216115  | H | -1.172541073237 | 7.086903687098  | 2.474948069117  |
| C  | 5.618756138081  | -1.495136678565 | 1.198453295269  | H | 4.867584674501  | 6.687803979551  | -0.461495626313 |
| H  | 5.366579709832  | -3.557771737215 | 1.633724053581  | C | 1.123256520611  | 2.415690069951  | 0.882580642479  |
| H  | 5.819595454877  | 0.464755884041  | 0.392557986772  | C | 0.635605215117  | 3.915662181286  | -2.068181364592 |
| C  | 4.440151245979  | 0.449474577891  | -1.873832625239 | C | 2.001517185645  | 1.758986966285  | 1.803124110254  |
| C  | 3.825289835799  | -4.530005459390 | -0.279273362484 | H | -0.133815641257 | 4.267613902807  | -4.059822880419 |
| C  | 6.546018851485  | -1.196265212937 | 2.371040351497  | H | 1.307789052624  | 3.122371723814  | -2.397265602500 |
| C  | -4.219403073162 | 2.973677223995  | -0.550439802765 | C | 0.822880054842  | -1.767320929253 | 1.490720329704  |
| C  | -6.598033235534 | -1.394979779277 | 0.381282036959  | C | 0.548267115188  | -2.436155068912 | 2.660847903616  |
| C  | -3.225612007184 | 0.193379599760  | 3.739663177227  | C | -0.038633991662 | -1.969605661078 | 0.366305330307  |
| P  | -1.835980797782 | 2.324754187542  | 1.753552191328  | C | -0.609830234111 | -3.230383809910 | 2.823608613439  |
| P  | 2.195733565071  | -2.320027974466 | -1.737601695533 | H | 1.206695679440  | -2.299290085342 | 3.522703163949  |
| P  | 0.237732075510  | -1.406793584118 | -1.375810225724 | C | -1.214931479046 | -2.708467621529 | 0.506412264209  |
| P  | -0.463277297703 | 1.609824963704  | 0.408354418386  | C | -1.535162187076 | -3.332120552918 | 1.745499838623  |
| Pd | -0.441135984216 | 0.801257902536  | -1.71977735042  | C | -0.916022296325 | -3.855846290673 | 4.056640851958  |
| Cl | -0.549870047827 | 0.649436784406  | -4.121960564799 | C | -2.142662502160 | -2.814776319092 | -0.654717222340 |
| Cl | 2.330238547476  | -2.073168324481 | -3.822319128595 | C | -2.743333629271 | -4.048226561095 | 1.945485100425  |
| C  | 4.522476014818  | 5.799594016597  | 0.064305202351  | C | -2.092653199157 | -4.544542774757 | 4.220212014649  |
| C  | -1.133781665383 | 6.779039928880  | 1.431599195532  | H | -0.203733411962 | -3.767324900378 | 4.877062982072  |
| C  | 2.798689084443  | 4.142961306146  | 0.483987885146  | C | -2.174384129508 | -3.988198760343 | -1.466572026293 |
| C  | -0.241052470283 | 5.329325578970  | -0.300458272433 | C | -2.905297365300 | -1.719837406640 | -1.001980998671 |
| C  | 0.606429513741  | 4.265438195257  | -0.732707595268 | C | -3.017048026115 | -4.638200762650 | 3.154994790061  |
| C  | 1.508769116636  | 3.582063538473  | 0.236228601656  | H | -3.454158522580 | -4.125473775398 | 1.123470984037  |
| C  | -0.173752454981 | 4.577946051323  | -3.017161685954 | H | -2.320669219424 | -5.016357989478 | 5.174249459968  |
| C  | -0.995350866563 | 5.602499246869  | -2.623373756718 | C | -2.982565367220 | -3.989377351979 | -2.643056951678 |
| C  | -1.047605675387 | 6.004636123192  | -1.265767997012 | C | -1.399210125213 | -5.138255085798 | -1.174011080806 |
| C  | -1.883273954559 | 7.066893322751  | -0.843281484973 | C | -3.684338216051 | -1.717272757984 | -2.178634087445 |
| C  | -1.927544777679 | 7.448410528036  | 0.475173859614  | H | -2.876194429239 | -0.825420094619 | -0.376990983750 |
| H  | -2.573560038151 | 8.267100249429  | 0.786812867788  | H | -3.949727901380 | -5.182015904769 | 3.295005133375  |
| H  | -2.492883768590 | 7.576364103375  | -1.590074129252 | C | -3.721980656556 | -2.827911290571 | -2.983063509684 |

|   |                 |                 |                 |   |                 |                 |                 |
|---|-----------------|-----------------|-----------------|---|-----------------|-----------------|-----------------|
| C | -3.006686601591 | -5.145483185135 | -3.460673408628 | H | 2.464220955095  | -4.560104910962 | 1.423234108016  |
| C | -1.438396666038 | -6.241506103646 | -1.991798109701 | H | 1.627770429212  | -4.353603307725 | -0.129940518036 |
| H | -0.770194664400 | -5.141711872590 | -0.283740247035 | H | 2.287766229695  | -5.940369754528 | 0.312846111476  |
| H | -4.245811011737 | -0.820428021880 | -2.441178895465 | C | 4.847767742786  | -5.452057152973 | 0.411911360092  |
| H | -4.318247582362 | -2.835832975403 | -3.895592293407 | H | 5.878241079674  | -5.236030339532 | 0.098783163883  |
| C | -2.254094281630 | -6.249164974782 | -3.144002612192 | H | 4.797171204404  | -5.407097831313 | 1.507012413254  |
| H | -3.631692655543 | -5.136977499360 | -4.353877156791 | H | 4.623878324782  | -6.489639572219 | 0.133271024576  |
| H | -0.836437990913 | -7.116015412503 | -1.750980117750 | C | -3.813547073197 | 4.187955155531  | 0.290712416336  |
| H | -2.278664874739 | -7.130066385405 | -3.782846461664 | H | -2.751470990345 | 4.198161224667  | 0.571672886008  |
| C | 1.931884502577  | -0.752062766507 | 1.478950205858  | H | -3.968942220999 | 5.108263442503  | -0.289348526233 |
| H | 2.886638631398  | -1.216572719453 | 1.770152589337  | H | -4.414729573818 | 4.257287563882  | 1.208888495884  |
| H | 2.084831844615  | -0.374650479835 | 0.461354504531  | C | -3.308850775768 | 2.859205516588  | -1.775972895029 |
| C | 1.640712362160  | 0.441663858115  | 2.426481987082  | H | -2.249815795576 | 2.792969302675  | -1.492497117821 |
| H | 0.580539806585  | 0.433111500191  | 2.703852451204  | H | -3.560487058956 | 1.971717575227  | -2.376323265984 |
| H | 2.198968415430  | 0.315326885370  | 3.364408994131  | H | -3.417844416705 | 3.748484966157  | -2.414995727410 |
| C | 3.036841603315  | 0.970776302855  | -2.181469505823 | C | -5.632977742988 | 3.297329355349  | -1.069399135090 |
| H | 2.567741066287  | 1.376583403438  | -1.271579744251 | H | -5.966262943794 | 2.616718742845  | -1.862392248517 |
| H | 3.110761428776  | 1.789095874524  | -2.913873956278 | H | -6.378072183777 | 3.281510022116  | -0.262287604963 |
| H | 2.362133438950  | 0.229308848220  | -2.613385511932 | H | -5.627190610539 | 4.304652719605  | -1.505754209621 |
| C | 5.244265744175  | 1.686656501929  | -1.449272939629 | C | -3.624211381910 | 1.456404693760  | 4.517832393241  |
| H | 5.166672570295  | 2.441404943610  | -2.243586615762 | H | -4.715895567477 | 1.581510316121  | 4.522992177717  |
| H | 4.852696618050  | 2.140123567633  | -0.527380076060 | H | -3.283809756325 | 1.376078896634  | 5.560265804642  |
| H | 6.312609883684  | 1.473148823292  | -1.311901281456 | H | -3.181585208568 | 2.369231145265  | 4.096741446198  |
| C | 5.120573911704  | -0.090105327921 | -3.141386164503 | C | -1.710216646783 | -0.018875903709 | 3.832499939320  |
| H | 6.166925619042  | -0.350614365817 | -2.927617859046 | H | -1.444516404367 | -0.435029727872 | 4.815593776012  |
| H | 4.625001358817  | -0.980552078238 | -3.539556004356 | H | -1.359160438313 | -0.722658292829 | 3.066862752052  |
| H | 5.116319337171  | 0.681618071238  | -3.924801203307 | H | -1.148126983841 | 0.917438912472  | 3.725863872431  |
| C | 6.000347285286  | -0.002965865734 | 3.161976595081  | C | -3.863843955097 | -0.991354229183 | 4.475997732759  |
| H | 5.948024659754  | 0.906723712973  | 2.548372405192  | H | -3.612362480874 | -1.954692621119 | 4.007838086056  |
| H | 4.991400206983  | -0.217109252225 | 3.546730808491  | H | -3.478111547125 | -1.013918253553 | 5.503674643268  |
| H | 6.652590980720  | 0.212664932311  | 4.019794349161  | H | -4.956815354477 | -0.906675620201 | 4.541472627822  |
| C | 7.941771438287  | -0.856901808682 | 1.832908532061  | C | -6.077723738514 | -2.836363118774 | 0.442487663956  |
| H | 8.624425158163  | -0.639786452907 | 2.666780041356  | H | -5.288833305282 | -3.006328350627 | -0.305316964765 |
| H | 8.356367190207  | -1.700508670408 | 1.263770719904  | H | -5.671016355097 | -3.090430133618 | 1.431327954929  |
| H | 7.927204467517  | 0.021410309417  | 1.174129040942  | H | -6.899738865675 | -3.536373679141 | 0.235956788474  |
| C | 6.676047283580  | -2.378243353732 | 3.329555218610  | C | -7.713291023911 | -1.220040589176 | 1.422130638852  |
| H | 5.702299241414  | -2.678119252945 | 3.741780747430  | H | -8.111561185018 | -0.195803377916 | 1.398984367151  |
| H | 7.131766901308  | -3.253382953113 | 2.846329591870  | H | -8.540533052396 | -1.913046984060 | 1.211102295185  |
| H | 7.322320552590  | -2.096007318089 | 4.171399476761  | H | -7.357323070825 | -1.421421286337 | 2.441564461958  |
| C | 3.862637687235  | -4.954015229860 | -1.756929121539 | C | -7.204616807383 | -1.167707471953 | -1.002311908986 |
| H | 3.739535559332  | -6.043419862261 | -1.825564120573 | H | -7.984128275399 | -1.919552690442 | -1.185996728880 |
| H | 3.070191167896  | -4.514036939534 | -2.370561774457 | H | -7.678264723677 | -0.180239996891 | -1.089608001055 |
| H | 4.829630947212  | -4.693665008200 | -2.209998906717 | H | -6.454689247146 | -1.266141136345 | -1.799528975068 |
| C | 2.468176242665  | -4.856428221114 | 0.363755378729  |   |                 |                 |                 |

Int-4<sub>B</sub>

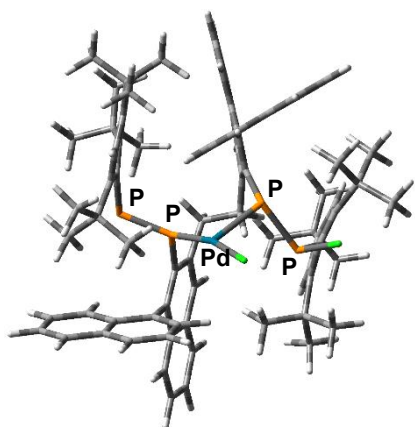

|   |                 |                 |                 |   |                 |                 |                 |
|---|-----------------|-----------------|-----------------|---|-----------------|-----------------|-----------------|
| C | -3.202040787004 | 1.624143454293  | 1.443314869325  | H | 4.760144010851  | -5.130046973057 | -1.982490519130 |
| C | -3.629990411968 | 0.586399465515  | 2.333480777151  | H | 3.298975477075  | -5.904253075889 | -2.638631428066 |
| C | -4.025281576556 | 1.992096910511  | 0.345131735539  | C | 3.083005765348  | -5.788188865036 | 0.021160380238  |
| C | -4.709778918217 | -0.197829614998 | 1.936010697068  | H | 2.629207249616  | -6.674158101418 | -0.441848907382 |
| C | -5.108122396018 | 1.158009009797  | 0.031886505974  | H | 4.133546249352  | -6.034028092213 | 0.223150123019  |
| C | -5.443665804977 | 0.034125209839  | 0.773646151242  | H | 2.568903829675  | -5.617831075705 | 0.978256510235  |
| H | -5.023960513120 | -1.018295375278 | 2.572404804669  | C | 5.234721494006  | -0.284970473114 | -3.048332282757 |
| H | -5.722078750990 | 1.409820306881  | -0.826141186485 | H | 5.639930303542  | 0.562830107292  | -3.618281402663 |
| C | -3.893351497943 | 3.302535761801  | -0.468600881058 | H | 5.938641718784  | -1.124138913591 | -3.142241105253 |
| C | -6.648417877508 | -0.849680671982 | 0.456853822868  | H | 4.296543469113  | -0.574690657580 | -3.534011195857 |
| C | -3.101162519315 | 0.389573929070  | 3.775057323322  | C | 6.463831372935  | 0.605863628603  | -1.133191138705 |
| C | 3.605976587216  | -2.052570937928 | -1.077362581314 | H | 6.828722772030  | 1.332968329411  | -1.870165458192 |
| C | 3.560042263353  | -3.305792976936 | -0.390356636108 | H | 6.440207536422  | 1.126076892288  | -0.165085879539 |
| C | 4.612069819829  | -1.091487834218 | -0.715227124502 | H | 7.195791148167  | -0.211442608281 | -1.077850570693 |
| C | 4.293565124194  | -3.419970608791 | 0.793041909073  | C | 4.154967007086  | 1.347045283423  | -1.433506331786 |
| C | 5.288700605857  | -1.287800091143 | 0.489611862673  | H | 4.660692896840  | 2.243161722196  | -1.826407917778 |
| C | 5.096057318996  | -2.402231228600 | 1.298583525271  | H | 3.204632011516  | 1.232987514240  | -1.966741641277 |
| H | 4.225310551109  | -4.339862932766 | 1.359701607401  | H | 3.935101217345  | 1.528536908723  | -0.372399179683 |
| H | 5.992374046223  | -0.531471094197 | 0.824073039018  | C | -5.245875276483 | 3.706147525697  | -1.081378920099 |
| C | 5.071146002886  | 0.121670245734  | -1.576783294933 | H | -5.558840397773 | 3.043088469181  | -1.897975997476 |
| C | 5.788492572892  | -2.490859092829 | 2.653603637491  | H | -6.046274464751 | 3.735615267038  | -0.329539702013 |
| C | 2.922867475330  | -4.601840686033 | -0.940015294465 | H | -5.150588394228 | 4.710892816951  | -1.513030360536 |
| C | 5.421661634200  | -3.763217757891 | 3.414162275604  | C | -3.487472098527 | 4.480525013566  | 0.424466083164  |
| H | 5.751926306545  | -4.669030384424 | 2.887147893604  | H | -2.454643406313 | 4.424271417945  | 0.796352506772  |
| H | 5.912638370929  | -3.756862846797 | 4.396593121778  | H | -3.539063731523 | 5.416757970313  | -0.148652748420 |
| H | 4.337569705172  | -3.837035585102 | 3.582994058310  | H | -4.158412580584 | 4.570024605351  | 1.290792306694  |
| C | 5.360940480028  | -1.291262557118 | 3.508098086100  | C | -2.912161581954 | 3.162870286115  | -1.637322968098 |
| H | 5.625274382676  | -0.334659903964 | 3.037182855642  | H | -1.874970675156 | 3.053883574078  | -1.295669835905 |
| H | 4.272550125091  | -1.301582404060 | 3.677066825414  | H | -3.165258270776 | 2.294239674657  | -2.264219213828 |
| H | 5.854402435808  | -1.328814865946 | 4.489580084645  | H | -2.946357248224 | 4.062651643171  | -2.270254004501 |
| C | 7.309001872383  | -2.466023979145 | 2.457961179167  | C | -7.261173661206 | -0.543637441503 | -0.908868764508 |
| H | 7.815666528106  | -2.527672977716 | 3.431596715955  | H | -8.105612709004 | -1.222616264718 | -1.089474573515 |
| H | 7.637918684669  | -3.319275779201 | 1.848665331324  | H | -7.650607439937 | 0.482050267193  | -0.967575881810 |
| H | 7.647616542867  | -1.546480735381 | 1.962581854683  | H | -6.537914920831 | -0.688861864905 | -1.723503366514 |
| C | 1.422728565993  | -4.527500877934 | -1.220662432252 | C | -7.721727045063 | -0.598002581639 | 1.525603648782  |
| H | 0.870582235165  | -4.306184241849 | -0.296275549166 | H | -8.027933015963 | 0.457672994141  | 1.530214494798  |
| H | 1.141985251706  | -3.794862787767 | -1.983620261962 | H | -8.611535439937 | -1.210756995403 | 1.320846554008  |
| H | 1.074659096385  | -5.502920149696 | -1.590088346123 | H | -7.363630463747 | -0.850522236386 | 2.532873807559  |
| C | 3.697644614954  | -4.970728972575 | -2.215426719193 | C | -6.254543071290 | -2.331580094066 | 0.480574067822  |
| H | 3.631106026616  | -4.192613063790 | -2.982394133699 | H | -5.499029424119 | -2.552931127498 | -0.287449329849 |

|   |                 |                 |                 |    |                 |                 |                 |
|---|-----------------|-----------------|-----------------|----|-----------------|-----------------|-----------------|
| H | -5.852635563249 | -2.641023450880 | 1.455440244238  | C  | 3.435715365744  | 2.103897858585  | 2.182546269655  |
| H | -7.138215600815 | -2.953347890417 | 0.278383463502  | C  | 1.370307595320  | 2.332659826423  | 0.951666234532  |
| C | -3.808280263913 | -0.766456565107 | 4.494047928593  | C  | 3.939382914899  | 3.285017553703  | 1.589953353993  |
| H | -3.622779653306 | -1.733488449962 | 4.002922741674  | H  | 4.069966866595  | 1.560904399627  | 2.886715238669  |
| H | -3.415875108922 | -0.834889275362 | 5.517070068574  | C  | 1.828200493756  | 3.493169645897  | 0.347095958406  |
| H | -4.892877716271 | -0.614055544224 | 4.572840798659  | C  | 3.128541885275  | 3.996051991752  | 0.659614643044  |
| C | -3.415539024206 | 1.661986718416  | 4.576053485982  | C  | 5.249598200114  | 3.745335377704  | 1.862083197520  |
| H | -3.075030329849 | 1.543568021897  | 5.614826466521  | C  | 3.660553706133  | 5.157245978974  | 0.044114254092  |
| H | -2.918690845591 | 2.551627277102  | 4.165778243661  | C  | 5.741403294128  | 4.866857325658  | 1.241139372074  |
| H | -4.497082265954 | 1.855471954490  | 4.590286202835  | H  | 5.862144495840  | 3.184307345162  | 2.568400396573  |
| C | -1.602258060566 | 0.080293324437  | 3.855763810883  | C  | 4.936579870554  | 5.580251488952  | 0.326710292549  |
| H | -1.360701110365 | -0.388689526780 | 4.820855279899  | H  | 3.048882629984  | 5.709590914917  | -0.667461883577 |
| H | -1.301138100564 | -0.613845132713 | 3.061804414200  | H  | 6.752843703222  | 5.209356052793  | 1.451693866941  |
| H | -0.981427254818 | 0.982000208492  | 3.781296927555  | H  | 5.332633476795  | 6.469734207760  | -0.159559815022 |
| C | -3.193478194506 | -4.454799862274 | 3.138392597188  | C  | 1.008825281427  | 4.206200584641  | -0.671753757361 |
| C | -2.229861452825 | -6.097229847639 | -1.995928612499 | C  | 0.203633567493  | 5.326620184739  | -0.310809980775 |
| C | -1.675673921737 | -3.228329571154 | 1.693954407376  | C  | 1.082055967745  | 3.814382896206  | -1.994405387425 |
| C | -2.590833664944 | -3.754972339727 | -1.460900280928 | C  | -0.518486976102 | 6.014129998949  | -1.332544028864 |
| C | -2.351300764884 | -2.594663911539 | -0.661326400193 | C  | 0.096724971654  | 5.786959196024  | 1.026079354731  |
| C | -1.362756082018 | -2.596471928725 | 0.456224550527  | C  | 0.358371069454  | 4.491384412975  | -3.000641081420 |
| C | -3.815071567112 | -1.299887354601 | -2.109772685648 | H  | 1.726518405166  | 2.976154642739  | -2.266918849424 |
| C | -4.036241515124 | -2.391456654693 | -2.909863526605 | C  | -1.313292428881 | 7.131706888364  | -0.979905799668 |
| C | -3.447727325545 | -3.643017842193 | -2.597766779874 | C  | -0.422884229811 | 5.570113268969  | -2.674866728800 |
| C | -3.679290337234 | -4.783999142961 | -3.404265313557 | C  | -0.683168828404 | 6.875570791041  | 1.335355137803  |
| C | -3.086255945133 | -5.986915966699 | -3.112332892096 | H  | 0.649350655620  | 5.269775181816  | 1.810307638162  |
| H | -3.270583432878 | -6.855862638683 | -3.741319906890 | H  | 0.432661898451  | 4.150763902870  | -4.031749518960 |
| H | -4.337433327501 | -4.683824659139 | -4.267506275659 | C  | -1.394040610420 | 7.556729120784  | 0.323625330005  |
| H | -4.672029230209 | -2.317046028822 | -3.792354000051 | H  | -1.859219627169 | 7.650315426886  | -1.768457311877 |
| C | -2.215677240886 | -4.472236205693 | 4.158497241233  | H  | -0.981476404912 | 6.105627870096  | -3.442852668766 |
| C | -0.996358403116 | -3.873087152464 | 3.957826222651  | H  | -0.751364109441 | 7.218292079576  | 2.366231197509  |
| C | -0.698485758200 | -3.232302334527 | 2.731135699052  | H  | -2.006179878492 | 8.419154601677  | 0.581011988909  |
| H | -2.436281259366 | -4.955951894403 | 5.108271074881  | C  | 2.189923211292  | 1.613203350666  | 1.879637726449  |
| H | -0.242772259040 | -3.866895041228 | 4.745341911266  | C  | 1.740470104491  | 0.291699861016  | 2.428845441928  |
| C | 0.504711543130  | -2.512268278221 | 2.543338319582  | H  | 0.692026143368  | 0.348635486951  | 2.743221077885  |
| H | 1.205902886187  | -2.445306710630 | 3.380321378320  | H  | 2.316587867876  | 0.050730291419  | 3.333301912328  |
| C | -1.988825627651 | -5.009219786399 | -1.192400120967 | C  | 1.906202058858  | -0.835820533698 | 1.379485527310  |
| H | -1.326552114895 | -5.106224580697 | -0.333066466640 | H  | 2.858650677659  | -1.349417507905 | 1.563276542685  |
| C | -2.929216967713 | -3.848108755784 | 1.935043142711  | H  | 1.998011876963  | -0.379084795817 | 0.386417607495  |
| H | -3.682738222713 | -3.837881687434 | 1.148539778301  | P  | -0.260459346502 | 1.633566986304  | 0.450385070845  |
| H | -1.756349558245 | -7.051374777750 | -1.770235868556 | P  | -1.571774388921 | 2.437550265951  | 1.806220630578  |
| H | -4.160784773006 | -4.924235776068 | 3.308634398521  | P  | 0.132990194590  | -1.444886660814 | -1.467308106679 |
| C | -0.140145780487 | -1.934042307550 | 0.289338381037  | Pd | -0.366516912108 | 0.835476851291  | -1.699254634826 |
| C | -2.984353801939 | -1.409767571599 | -0.975349422904 | Cl | -0.495743174233 | 0.626498166059  | -4.076053933963 |
| C | 0.765527511332  | -1.810896356862 | 1.390254332501  | P  | 2.322583004708  | -1.229746779276 | -2.129188851891 |
| H | -4.268134966510 | -0.336781727909 | -2.345231216574 | Cl | 2.063747879637  | -2.370926753476 | -3.924399723966 |
| H | -2.808324346662 | -0.529029968276 | -0.355215915848 |    |                 |                 |                 |

TS-1

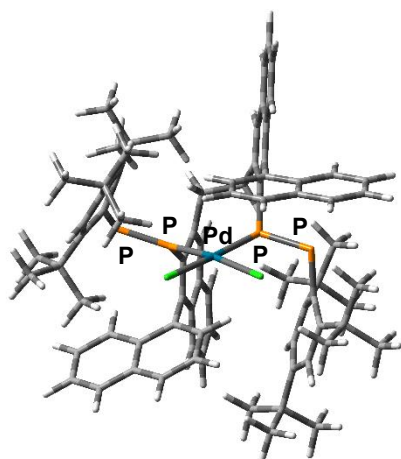

|   |                 |                 |                 |    |                 |                 |                 |
|---|-----------------|-----------------|-----------------|----|-----------------|-----------------|-----------------|
| C | 5.386483860386  | 3.470317060689  | 2.695915947505  | C  | -3.662997157688 | -3.993506200101 | 4.577830291867  |
| C | 1.524410372826  | 6.501240805730  | 0.000490252201  | C  | -2.098056846795 | -3.239733359898 | -0.042899923513 |
| C | 3.124441718558  | 2.683780126183  | 2.303439783361  | P  | 1.499845484096  | -3.183834391329 | -0.041750804291 |
| C | 1.946431457543  | 4.150644857954  | -0.435733708804 | C  | -3.916121137941 | -4.411833776149 | 1.826752542672  |
| C | 2.096605792123  | 2.800030127671  | 0.001036318169  | C  | -4.702979829824 | -4.743918935739 | 4.089851870817  |
| C | 2.014274501501  | 2.438013668712  | 1.443041244903  | H  | -3.556045162578 | -3.816542532774 | 5.648107847785  |
| C | 2.431353174061  | 2.092661994063  | -2.303034030919 | C  | -1.717412115876 | -4.436798284304 | -0.718781956577 |
| C | 2.319022460778  | 3.386992568246  | -2.742862554471 | C  | -2.830691833140 | -2.284278848889 | -0.716695170335 |
| C | 2.080868638396  | 4.442441021256  | -1.826597882165 | C  | -4.829449590226 | -4.951198694719 | 2.699217962021  |
| C | 1.952854509418  | 5.783487802837  | -2.262903690207 | H  | -4.029076907931 | -4.579197283297 | 0.757403814191  |
| C | 1.684196415987  | 6.793103241359  | -1.371502317163 | H  | -5.433972774496 | -5.176617249183 | 4.770453343590  |
| H | 1.586242681539  | 7.819504353714  | -1.720475253181 | C  | -2.079694950303 | -4.602185109093 | -2.090072948277 |
| H | 2.064735291570  | 5.996476367480  | -3.326258519864 | C  | -1.006836216372 | -5.483259506554 | -0.077003927367 |
| H | 2.402037103414  | 3.624675407073  | -3.803519370293 | C  | -3.204491021781 | -2.462031593892 | -2.064767546315 |
| C | 5.282451542410  | 3.112127087207  | 4.058588536206  | H  | -3.144994274812 | -1.379540782051 | -0.192846904291 |
| C | 4.126394808120  | 2.547731080536  | 4.536662180686  | H  | -5.658761489487 | -5.542728068067 | 2.315653537822  |
| C | 3.027405150860  | 2.310078504282  | 3.675367984323  | C  | -2.835652459375 | -3.596035681445 | -2.739226701340 |
| H | 6.124790574888  | 3.281889032990  | 4.726698266724  | C  | -1.684491054745 | -5.780139763831 | -2.770410998536 |
| H | 4.039612052107  | 2.257387228378  | 5.583738498535  | C  | -0.644943894632 | -6.617858983194 | -0.761548494838 |
| C | 1.867074737749  | 1.644107383729  | 4.128740126525  | H  | -0.743683765805 | -5.373887717293 | 0.975215240126  |
| H | 1.834384626109  | 1.303726097404  | 5.166721280631  | H  | -3.778980157144 | -1.681914948262 | -2.564412014074 |
| C | 1.656566586266  | 5.211959748650  | 0.457976932570  | H  | -3.115585188196 | -3.742642570633 | -3.782611777392 |
| H | 1.538229394948  | 4.992959050330  | 1.519246195875  | C  | -0.978500268972 | -6.765595082030 | -2.125635019195 |
| C | 4.331342636139  | 3.267389816999  | 1.840671559700  | H  | -1.958513655487 | -5.889572227594 | -3.820087935174 |
| H | 4.415310627812  | 3.552497702139  | 0.792803031828  | H  | -0.096852821332 | -7.408134857394 | -0.251266394361 |
| H | 1.299595662242  | 7.304402305172  | 0.700151989594  | H  | -0.681130942624 | -7.665899933544 | -2.660706534517 |
| H | 6.308577712671  | 3.912670288295  | 2.322863464212  | C  | 0.228831186385  | -1.041624437454 | 3.933594201247  |
| C | 0.881407582634  | 1.807814615432  | 1.938010602909  | H  | 0.370550334352  | -1.265625792103 | 4.999173874034  |
| C | 2.340713444807  | 1.804770267460  | -0.924453808152 | H  | 1.217735257135  | -1.137497376428 | 3.469092520613  |
| P | -1.789157655144 | 3.092135309998  | 1.341075373330  | P  | 0.561878689347  | -1.532822048208 | 0.926740417198  |
| C | 0.819670682784  | 1.345762292938  | 3.289207497778  | P  | -0.537255622056 | 1.571760903033  | 0.791004129458  |
| H | 2.592355872209  | 1.275709019606  | -3.006907331782 | Pd | -0.312410181956 | -0.129404566149 | -0.744162499270 |
| H | 2.485674314918  | 0.777688638778  | -0.582035360480 | Cl | -1.314446922936 | 1.230469867474  | -2.460308820404 |
| C | -0.742986574651 | -2.029805223243 | 3.344545334456  | Cl | 0.282546266093  | -1.780455904523 | -2.394390230470 |
| C | -1.665943336769 | -2.604578991672 | 4.182032518506  | C  | -0.268011179647 | 0.425146985687  | 3.776175664914  |
| C | -0.806647842645 | -2.295593455633 | 1.929765072747  | H  | -1.120149841552 | 0.437437895463  | 3.083530196453  |
| C | -2.708924398269 | -3.423825275651 | 3.700801202769  | H  | -0.663856573904 | 0.777403470539  | 4.739310692777  |
| H | -1.613167156697 | -2.405780210658 | 5.254407794338  | C  | -3.312063968113 | 2.800892350952  | 0.339271807502  |
| C | -1.855503800879 | -3.054849534720 | 1.416729927002  | C  | -4.199822213023 | 1.754628373758  | 0.698087199192  |
| C | -2.823546605819 | -3.636869476283 | 2.298656784571  | C  | -3.522251686502 | 3.529022350468  | -0.869273620025 |

|   |                 |                 |                 |   |                 |                 |                 |
|---|-----------------|-----------------|-----------------|---|-----------------|-----------------|-----------------|
| C | -5.046703766571 | 1.253524456538  | -0.299011638630 | H | -7.391583646163 | 0.084833422587  | -1.387244407028 |
| C | -4.433860268999 | 3.004933961902  | -1.779960061044 | C | -5.224965913675 | 1.008004762783  | -3.920314315691 |
| C | -5.144877413639 | 1.823223480528  | -1.560592808190 | H | -4.745777069165 | 1.921930904537  | -4.295066019692 |
| H | -5.670984814976 | 0.396501374013  | -0.059380788871 | H | -4.430111499498 | 0.271757761361  | -3.731505721426 |
| H | -4.586344058636 | 3.521988030104  | -2.723301445415 | H | -5.871109868446 | 0.616086403284  | -4.718772974011 |
| C | 3.096034382615  | -2.432304348289 | -0.519965234826 | C | -7.155419580859 | 2.282242141831  | -2.966217443004 |
| C | 3.864706498303  | -1.669854588779 | 0.418413742317  | H | -7.820957155542 | 1.888509767090  | -3.747888261917 |
| C | 3.535924445699  | -2.481759576499 | -1.878222121673 | H | -7.762382588786 | 2.486448210724  | -2.072978359411 |
| C | 4.742815468540  | -0.711597092102 | -0.081603825227 | H | -6.748346939629 | 3.236979032626  | -3.324268852481 |
| C | 4.436214079700  | -1.498641476033 | -2.297397158724 | C | 6.004765689175  | 1.751790460931  | -1.123709386476 |
| C | 4.999602055015  | -0.552350039551 | -1.443253286345 | H | 6.766940263630  | 2.442950025521  | -1.509453374638 |
| H | 5.310432399688  | -0.112145065446 | 0.628757184648  | H | 5.024850911243  | 2.243163989674  | -1.211762723717 |
| H | 4.744831508395  | -1.501951842221 | -3.340046086923 | H | 6.217073929685  | 1.601689765108  | -0.056858568781 |
| C | 3.283283548799  | -3.622093786391 | -2.887244721984 | C | 7.421440656702  | -0.205334965333 | -1.752048463779 |
| C | 4.076866453762  | -2.039583245539 | 1.905907218106  | H | 8.214377841210  | 0.476203632307  | -2.092821549176 |
| C | 6.043573326569  | 0.450075471211  | -1.929362344643 | H | 7.613016145196  | -0.452306780175 | -0.698045089820 |
| C | -2.843801836482 | 4.875212869704  | -1.203423057096 | H | 7.493116624957  | -1.133814544018 | -2.336456103332 |
| C | -4.431325390302 | 1.185698278631  | 2.118033325479  | C | 5.860784305714  | 0.811775480832  | -3.404610617405 |
| C | -6.050203924848 | 1.265585556635  | -2.653988238998 | H | 6.004185058670  | -0.047289951030 | -4.072395795156 |
| C | -2.811884580880 | 5.800301596471  | 0.020806148245  | H | 4.864825676617  | 1.236046880510  | -3.594657921986 |
| H | -2.428397253867 | 6.787167578261  | -0.274297252025 | H | 6.606439896267  | 1.566442438203  | -3.689609752374 |
| H | -3.816588896222 | 5.935217276468  | 0.445377477589  | C | 5.524289529801  | -2.573733399695 | 1.983999268567  |
| H | -2.149661413073 | 5.443007585764  | 0.820837867212  | H | 5.761788783884  | -2.852336578237 | 3.020524839948  |
| C | -1.424869441230 | 4.682407997732  | -1.743802715236 | H | 5.642671613511  | -3.467603346426 | 1.354508947591  |
| H | -0.754660034555 | 4.213803929120  | -1.011918139964 | H | 6.262907595256  | -1.831561426957 | 1.658119933056  |
| H | -1.429098548522 | 4.043184140129  | -2.636752562822 | C | 3.213149811123  | -3.172425906413 | 2.467580081710  |
| H | -0.992750960098 | 5.658641894315  | -2.009164592786 | H | 3.202921741940  | -4.053696589916 | 1.806469735649  |
| C | -3.627982094758 | 5.639674874498  | -2.279670945083 | H | 3.648926862069  | -3.505378399727 | 3.420203664114  |
| H | -3.574309235530 | 5.156210048012  | -3.263507414642 | H | 2.178937720268  | -2.887087614661 | 2.686246657692  |
| H | -4.685909579492 | 5.764588235639  | -2.009705921511 | C | 3.945826700389  | -0.818066249711 | 2.816847828359  |
| H | -3.189137826533 | 6.639598985158  | -2.394243728905 | H | 4.044204598029  | -1.113676106909 | 3.872431925943  |
| C | -3.963412407617 | -0.267985269404 | 2.217443770606  | H | 4.716207409075  | -0.060008199869 | 2.620077480303  |
| H | -4.520404678708 | -0.921789283890 | 1.531060798069  | H | 2.968675404186  | -0.336576350205 | 2.688040454760  |
| H | -2.893131314886 | -0.371413420702 | 1.982138839381  | C | 4.642077255205  | -4.344868709736 | -3.012881194141 |
| H | -4.120406263645 | -0.651515321578 | 3.237165340901  | H | 4.546455767232  | -5.197259283018 | -3.700393661342 |
| C | -3.799586266578 | 1.992572048072  | 3.256115983565  | H | 5.428372463364  | -3.684982670054 | -3.400315955356 |
| H | -4.040741340933 | 3.062793156737  | 3.181615104234  | H | 4.971753460782  | -4.728001420118 | -2.036512096480 |
| H | -4.203366388903 | 1.632055316759  | 4.212577836060  | C | 2.873739857740  | -3.112205844233 | -4.273968645560 |
| H | -2.711244569251 | 1.884304474578  | 3.329563888442  | H | 2.758695339839  | -3.967873794921 | -4.953971203638 |
| C | -5.945560587503 | 1.233342130785  | 2.407298292680  | H | 1.919644236124  | -2.573324605054 | -4.234976452019 |
| H | -6.537290877194 | 0.607869658585  | 1.730253296851  | H | 3.624036982088  | -2.448001712947 | -4.719688039658 |
| H | -6.132645598741 | 0.871119289323  | 3.427549740602  | C | 2.283843822553  | -4.696161563094 | -2.461198656221 |
| H | -6.324722020194 | 2.262391902426  | 2.337412943616  | H | 2.576157723952  | -5.187315697434 | -1.522492295740 |
| C | -6.715918819434 | -0.046599506086 | -2.244058017029 | H | 1.253868874075  | -4.322853214939 | -2.370919902431 |
| H | -7.315693096764 | -0.430995335296 | -3.080101319674 | H | 2.259959071880  | -5.480561712893 | -3.231519070112 |
| H | -5.977233086357 | -0.818078239060 | -1.981374122747 |   |                 |                 |                 |

TS-2

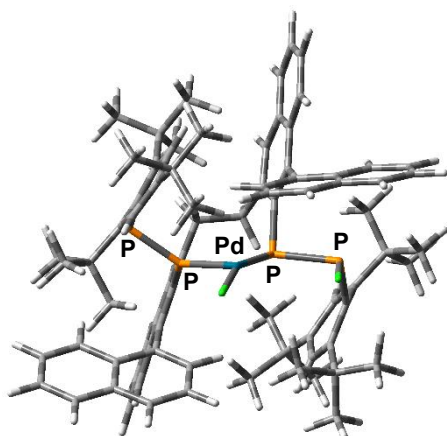

|   |                |                 |                 |   |                 |                 |                 |
|---|----------------|-----------------|-----------------|---|-----------------|-----------------|-----------------|
| C | 2.147004995808 | -3.343231418128 | -1.555242121641 | C | 2.227362194776  | 0.844817010220  | 2.545453364766  |
| C | 2.607703993012 | -4.111197958477 | -0.438464160708 | H | 2.464326043907  | 2.325667923917  | -3.860569915371 |
| C | 3.070024608893 | -2.479393697314 | -2.214391851297 | H | 2.758903075599  | 1.229396436973  | -1.635703481135 |
| C | 3.754891858163 | -3.649930257134 | 0.223036878243  | C | 0.097137316093  | -2.203159267446 | 2.701575017895  |
| C | 4.208587521483 | -2.102631633726 | -1.513848649423 | C | -0.575059148409 | -2.784630953381 | 3.746451024994  |
| C | 4.507457893892 | -2.574587048889 | -0.231042177118 | C | -0.543147540634 | -2.085951330544 | 1.419108477129  |
| H | 4.072896369205 | -4.162852864053 | 1.128033361350  | C | -1.911289535548 | -3.225361954254 | 3.623553234793  |
| H | 4.895874904177 | -1.402760933252 | -1.982081367546 | H | -0.083591313976 | -2.876131107869 | 4.717282906051  |
| C | 2.925583268240 | -2.029062105442 | -3.677862212421 | C | -1.863507018913 | -2.510947748010 | 1.267049715832  |
| C | 2.005978849180 | -5.457840299122 | 0.046538132072  | C | -2.579603940728 | -3.066492340112 | 2.376524345175  |
| C | 5.693908489584 | -2.029392595180 | 0.554704128191  | C | -2.612904193769 | -3.761996889846 | 4.729998369328  |
| C | 6.559063812278 | 3.165656162193  | 1.293289175864  | C | -2.616645106671 | -2.291766822271 | 0.002989291679  |
| C | 2.458527028220 | 6.654916000456  | 0.464571902913  | C | -3.951500249191 | -3.427652623656 | 2.301414702312  |
| C | 4.251428566453 | 2.410078627090  | 1.317321972316  | C | -3.935011197230 | -4.112776880142 | 4.619940774147  |
| C | 2.582371145995 | 4.476133564676  | -0.597161113770 | H | -2.082081444298 | -3.877605947797 | 5.675011019986  |
| C | 2.696194109727 | 3.054734441033  | -0.537870992732 | C | -3.049889264373 | -3.363611778943 | -0.836160094687 |
| C | 2.943714743661 | 2.345523444135  | 0.745108940859  | C | -3.001680937035 | -0.998494579763 | -0.304384912852 |
| C | 2.504585146603 | 2.936275206208  | -2.959406052015 | C | -4.610662753032 | -3.936768395486 | 3.392997144166  |
| C | 2.428272206454 | 4.303778342596  | -3.042629419482 | H | -4.489526742512 | -3.289814773693 | 1.365428192594  |
| C | 2.469976896708 | 5.102755567848  | -1.873851771385 | H | -4.467886306465 | -4.518029510143 | 5.478161582623  |
| C | 2.376626723751 | 6.514278394228  | -1.942625946696 | C | -3.862762268218 | -3.066779165517 | -1.972244484640 |
| C | 2.371659160421 | 7.276510278288  | -0.800551123580 | C | -2.687655766782 | -4.713956347093 | -0.598822742980 |
| H | 2.295662997563 | 8.360343612736  | -0.865707060791 | C | -3.807530207198 | -0.712121430435 | -1.426491441327 |
| H | 2.297838498224 | 6.982336279888  | -2.924137799368 | H | -2.751628651967 | -0.186546175199 | 0.381214882563  |
| H | 2.330247068217 | 4.797333660976  | -4.009532586257 | H | -5.663060249076 | -4.202655548048 | 3.313422336264  |
| C | 6.809582133525 | 2.470549177541  | 2.497475510010  | C | -4.233085911542 | -1.725770324791 | -2.243160428374 |
| C | 5.807101902175 | 1.750029407198  | 3.096079107041  | C | -4.269538333075 | -4.122384995191 | -2.824567666760 |
| C | 4.513659150142 | 1.698084231769  | 2.521864945197  | C | -3.090170742355 | -5.714070211597 | -1.448641829690 |
| H | 7.801546294954 | 2.504563903357  | 2.944201569085  | H | -2.068469304648 | -4.951155360623 | 0.265863245502  |
| H | 5.988956061409 | 1.198598555644  | 4.018838507588  | H | -4.071115941040 | 0.325941185227  | -1.623203530927 |
| C | 3.481436253398 | 0.930672711276  | 3.101115786370  | H | -4.857472799393 | -1.516675859631 | -3.112812867150 |
| H | 3.694274043518 | 0.378702967824  | 4.020181661715  | C | -3.888075597532 | -5.416723071514 | -2.575727476975 |
| C | 2.564753697022 | 5.288572247466  | 0.563843028710  | H | -4.886356080695 | -3.881137910767 | -3.690397221445 |
| H | 2.631792332700 | 4.814483482854  | 1.543325382736  | H | -2.791337088930 | -6.742824633303 | -1.254202918607 |
| C | 5.313602866034 | 3.135744253478  | 0.716706957098  | H | -4.200291029815 | -6.217844078361 | -3.243197631800 |
| H | 5.134846182187 | 3.669093791867  | -0.214894129004 | C | 1.431099879400  | -1.560880933894 | 2.964489265847  |
| H | 2.440733402521 | 7.264160072032  | 1.366632299189  | H | 1.897945838280  | -2.013477312611 | 3.850287077572  |
| H | 7.361673703591 | 3.726606331481  | 0.818287021013  | H | 2.124330770540  | -1.718908939173 | 2.126357028543  |
| C | 1.948987095477 | 1.586640726390  | 1.353422621021  | C | 1.209044040660  | -0.043186048672 | 3.196105431696  |
| C | 2.654969745283 | 2.315353515744  | -1.701887653872 | H | 0.213955802269  | 0.218430353367  | 2.826472245071  |



|   |                 |                 |                 |    |                 |                 |                 |
|---|-----------------|-----------------|-----------------|----|-----------------|-----------------|-----------------|
| H | 1.179488055984  | 0.151787200985  | 4.278222258093  | H  | 7.157858289779  | -2.867237591264 | -0.831824092985 |
| C | -2.464073967608 | 3.002936382060  | 1.118215427084  | H  | 7.805841242436  | -2.498659122886 | 0.784442701972  |
| C | -3.481089954247 | 2.085780666669  | 1.521979832920  | C  | -2.257796342638 | 0.666210748994  | 3.347300356026  |
| C | -2.743632073875 | 3.964528203846  | 0.103197874090  | H  | -2.456205469723 | 0.113273056702  | 4.276936972457  |
| C | -4.625911902680 | 1.994635392012  | 0.722853872610  | H  | -1.898534445809 | -0.059471300512 | 2.604179450328  |
| C | -3.907746084344 | 3.788824142649  | -0.646241629473 | H  | -1.444165497353 | 1.365815106457  | 3.579950631963  |
| C | -4.837672389968 | 2.785763254407  | -0.401303847229 | C  | -4.644065034798 | 0.307948880470  | 2.962843329978  |
| H | -5.389099869919 | 1.272877627294  | 0.989798384912  | H  | -4.530089467374 | -0.460154737110 | 2.183068022330  |
| H | -4.102988778294 | 4.474166132569  | -1.465749131467 | H  | -4.590186192053 | -0.203356276726 | 3.933753904085  |
| C | -1.900390323894 | 5.219519238615  | -0.224181286987 | H  | -5.650802680487 | 0.736986816441  | 2.885098401767  |
| C | -3.536399770600 | 1.370621621950  | 2.895699299611  | C  | -3.872995445798 | 2.460169131728  | 3.927093820106  |
| C | -6.084482247943 | 2.673653607535  | -1.276282256860 | H  | -4.818592573994 | 2.959781076491  | 3.675340404427  |
| C | 1.236291134415  | -6.202239017269 | -1.055378209577 | H  | -3.974328282246 | 2.016283862245  | 4.928142570005  |
| H | 1.831808230258  | -6.264001857509 | -1.977567099251 | H  | -3.087005607758 | 3.227440395688  | 3.973561316836  |
| H | 1.029773376443  | -7.227219596914 | -0.718105186491 | C  | -1.219458976514 | 5.822863973169  | 1.011744118238  |
| H | 0.271018557963  | -5.747208339705 | -1.301402560694 | H  | -0.839468703629 | 6.824231831458  | 0.765772576980  |
| C | 3.167406701966  | -6.398765839364 | 0.424379238759  | H  | -1.920412083006 | 5.922014327312  | 1.853395388828  |
| H | 2.762388314386  | -7.397674941655 | 0.634275938006  | H  | -0.343912925256 | 5.255870610605  | 1.352903457710  |
| H | 3.891911806551  | -6.491964940908 | -0.396108838060 | C  | -0.854697267671 | 4.911316746038  | -1.298053642894 |
| H | 3.706445065425  | -6.083290414391 | 1.325147371504  | H  | -0.114846278827 | 4.175391881797  | -0.957220531210 |
| C | 1.126787259875  | -5.296103481922 | 1.291435753556  | H  | -1.328630213496 | 4.506380957623  | -2.203006213284 |
| H | 1.674152391979  | -4.786561434855 | 2.098456698961  | H  | -0.310616189938 | 5.830534856368  | -1.563000114346 |
| H | 0.217266610461  | -4.714349381798 | 1.088355588320  | C  | -2.799475889222 | 6.343681283626  | -0.773021455702 |
| H | 0.820224839616  | -6.284635439998 | 1.663756189931  | H  | -3.185731307219 | 6.134969361266  | -1.777804798322 |
| C | 2.306534020993  | -3.160026224641 | -4.510561576839 | H  | -3.651292648574 | 6.548658767396  | -0.109360104539 |
| H | 2.181685412591  | -2.830310918100 | -5.551740310281 | H  | -2.205434499008 | 7.263031147425  | -0.855620412005 |
| H | 2.977222158545  | -4.031640686496 | -4.511215748889 | C  | -6.930104711455 | 3.940228612984  | -1.084221168801 |
| H | 1.332124737107  | -3.493858995311 | -4.148815740801 | H  | -7.843641762483 | 3.882537356867  | -1.693396113587 |
| C | 4.302379356400  | -1.779357559480 | -4.314972265850 | H  | -7.227853862369 | 4.054196347034  | -0.032341364858 |
| H | 4.810547586648  | -0.893006221719 | -3.914852841835 | H  | -6.384663861912 | 4.846170521678  | -1.381045574598 |
| H | 4.968122384633  | -2.645275244667 | -4.196384949054 | C  | -5.691281824743 | 2.552907788446  | -2.753902237871 |
| H | 4.164124952615  | -1.604993331893 | -5.391029179437 | H  | -6.595540049774 | 2.524502081243  | -3.378290961933 |
| C | 2.151856075243  | -0.710780137503 | -3.788960314044 | H  | -5.079308549263 | 3.398067850856  | -3.094463239168 |
| H | 1.920383104591  | -0.484173549287 | -4.840741879816 | H  | -5.123104654559 | 1.631319924089  | -2.948114830143 |
| H | 1.209735721393  | -0.703965409411 | -3.230546157012 | C  | -6.950561350768 | 1.467297412807  | -0.915069577359 |
| H | 2.776021112869  | 0.105797740318  | -3.400834553345 | H  | -6.399766535887 | 0.519727062428  | -1.006975106872 |
| C | 5.419449657346  | -2.069659258598 | 2.060263356638  | H  | -7.348750932625 | 1.536574579723  | 0.106699539206  |
| H | 4.521117356657  | -1.485896209264 | 2.311428335211  | H  | -7.810020403509 | 1.419265064069  | -1.597460281806 |
| H | 5.284242733232  | -3.090390308671 | 2.440620928548  | P  | 0.255073464919  | 1.647525091581  | 0.604208679974  |
| H | 6.267892017222  | -1.629305613651 | 2.603158560036  | P  | -0.758004366196 | 2.930170182761  | 1.844609233957  |
| C | 5.977592980547  | -0.574907022852 | 0.171115834681  | Cl | -1.460244018330 | 1.634203110208  | -2.906391835314 |
| H | 6.731758470141  | -0.148320914394 | 0.847366377994  | Pd | -0.581994254306 | 0.306659958780  | -1.066303902520 |
| H | 6.365460522506  | -0.476802898004 | -0.851315387281 | P  | 0.314668917883  | -3.216971107440 | -1.351603929086 |
| H | 5.068138174468  | 0.041703025127  | 0.254581961822  | P  | 0.536217721281  | -1.418015639901 | 0.051673791041  |
| C | 6.928968383335  | -2.883004433719 | 0.243168914538  | Cl | -0.658397650506 | -2.447448531147 | -3.081807790935 |
| H | 6.774618227376  | -3.929297777419 | 0.542186513464  |    |                 |                 |                 |

TS-3A

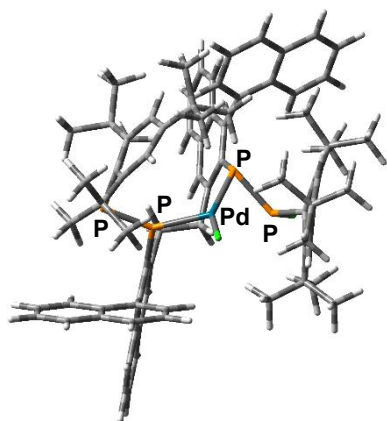

|   |                 |                 |                 |    |                 |                 |                 |
|---|-----------------|-----------------|-----------------|----|-----------------|-----------------|-----------------|
| C | -5.237452496091 | 2.754570518010  | 4.688152631812  | H  | 3.976007958947  | -3.489719985090 | 4.303022904945  |
| C | -7.687060755073 | 0.238409346831  | 0.832372955507  | C  | 6.135362815349  | -3.535346865836 | 1.668033018897  |
| C | -3.930890297838 | 1.635386064004  | 2.971537696882  | H  | 5.985827072522  | -2.350733183910 | -0.100900952500 |
| C | -5.796219284423 | 1.698158479350  | 0.392617907189  | H  | 6.051539063504  | -4.613832059492 | 3.548148012333  |
| C | -4.431769143641 | 2.082830357402  | 0.584092881792  | H  | 7.042381767564  | -4.037011928513 | 1.335842351105  |
| C | -3.593152428691 | 1.388247231011  | 1.602554595745  | C  | 4.341304062406  | -0.624987873381 | -0.856294112453 |
| C | -4.758201232679 | 3.960789366048  | -0.931247383728 | C  | 5.496722555002  | 0.210821282011  | -0.945792386351 |
| C | -6.072566988545 | 3.617483299212  | -1.117827071112 | C  | 3.869794171612  | -1.260370809255 | -1.983798695886 |
| C | -6.618791636640 | 2.482228359175  | -0.470248176760 | C  | 6.143695711765  | 0.357696519143  | -2.208823236019 |
| C | -7.970197568013 | 2.105137706206  | -0.667892891017 | C  | 6.032112371222  | 0.894370298894  | 0.174915262834  |
| C | -8.496006822859 | 1.008201660820  | -0.031771330062 | C  | 4.511544692823  | -1.109787564371 | -3.232055452157 |
| H | -9.536379258098 | 0.730096772367  | -0.189606948580 | H  | 2.991051969395  | -1.900878778501 | -1.908216107309 |
| H | -8.585053193405 | 2.708216907454  | -1.336273891039 | C  | 7.287801471741  | 1.186391582027  | -2.304189684439 |
| H | -6.717075710783 | 4.210547148025  | -1.766554874948 | C  | 5.630342218414  | -0.326342037692 | -3.339421505075 |
| C | -4.552321847513 | 2.038610770847  | 5.694251275832  | C  | 7.146671782511  | 1.689141077164  | 0.050598867434  |
| C | -3.563793712422 | 1.152291027054  | 5.350543702830  | H  | 5.545858276248  | 0.783807456679  | 1.144065200322  |
| C | -3.224865687089 | 0.942357575109  | 3.991907379537  | H  | 4.106705987408  | -1.624003855116 | -4.102159434655 |
| H | -4.805221014692 | 2.199761124876  | 6.740510947849  | C  | 7.782019312361  | 1.838296112013  | -1.200826429572 |
| H | -3.014189582874 | 0.603082406106  | 6.114820834027  | H  | 7.769914569991  | 1.295311408844  | -3.276363833090 |
| C | -2.176010819787 | 0.078453196619  | 3.620820250087  | H  | 6.137944265896  | -0.205022585871 | -4.296885626686 |
| H | -1.632068828107 | -0.440638796965 | 4.413126469122  | H  | 7.543114589415  | 2.207104763263  | 0.922180920760  |
| C | -6.371031827615 | 0.573258581408  | 1.036399098963  | H  | 8.663527484954  | 2.471079311837  | -1.287689827455 |
| H | -5.749314948375 | -0.040386748619 | 1.688317992941  | P  | 1.681519328049  | 0.923301760220  | -0.147204810339 |
| C | -4.938834092146 | 2.556925773879  | 3.362964520256  | P  | 2.624951209627  | 2.705407022530  | 0.217763391439  |
| H | -5.474325838292 | 3.121132150531  | 2.602445627131  | C  | 1.978467045569  | -0.686093040710 | 2.162191329462  |
| H | -8.108202028689 | -0.631828249222 | 1.332502387420  | C  | 0.678352600431  | -0.097819574672 | 2.613888519179  |
| H | -6.008577044373 | 3.470421930437  | 4.966459456199  | H  | 0.580797735964  | 0.941727629310  | 2.270333320946  |
| C | -2.523157207782 | 0.551212315758  | 1.273521039826  | H  | 0.644890647378  | -0.057266563520 | 3.711750166450  |
| C | -3.943020511270 | 3.190552782535  | -0.076130154072 | C  | -0.530192499152 | -0.900431085620 | 2.102199986822  |
| C | -1.787270147717 | -0.104666227133 | 2.315738261613  | H  | -0.584953290277 | -1.854228934412 | 2.648690408902  |
| H | -4.342018711666 | 4.838953758409  | -1.424724523191 | H  | -0.372650985637 | -1.159430768002 | 1.047863645235  |
| H | -2.904067664633 | 3.482408915093  | 0.082932262073  | P  | -2.116174716338 | 0.461299800629  | -0.535891968354 |
| C | 2.601852423539  | -1.627482926505 | 2.941804344636  | Pd | -0.038211592174 | 0.080163217992  | -1.495946578926 |
| C | 2.556018248254  | -0.318959002558 | 0.905761754489  | Cl | 1.013836424916  | -0.190974176975 | -3.669903006905 |
| C | 3.793540718423  | -2.265796706728 | 2.532843829098  | P  | -2.072761311267 | -1.675432796479 | -1.005936355610 |
| H | 2.167250288239  | -1.896668286323 | 3.907052769134  | C  | 1.633497789888  | 3.729822405837  | -0.979574025330 |
| C | 3.723123991397  | -0.929068701821 | 0.463347586177  | C  | 0.362650870106  | 4.250190832841  | -0.591288004450 |
| C | 4.361483836767  | -1.922186331937 | 1.273555292254  | C  | 2.017253743670  | 3.778574817342  | -2.338034927081 |
| C | 4.424875341275  | -3.241682235815 | 3.341164215825  | C  | -0.580782132006 | 4.454719591465  | -1.595156176533 |
| C | 5.545343095244  | -2.590492372950 | 0.864997996035  | C  | 1.011156501793  | 3.994335859218  | -3.291631817005 |
| C | 5.573523222570  | -3.863859346512 | 2.920598859150  | C  | -0.309820099131 | 4.238709628384  | -2.953001255324 |

|    |                 |                 |                 |   |                 |                 |                 |
|----|-----------------|-----------------|-----------------|---|-----------------|-----------------|-----------------|
| H  | -1.573122219889 | 4.804544298358  | -1.317838692245 | H | -4.724570334508 | -0.795748421596 | -0.765259278962 |
| H  | 1.287777560575  | 3.950523167826  | -4.342007235671 | H | -6.344204954944 | -1.014816255783 | -1.404621873656 |
| C  | 3.458063851188  | 3.733451675382  | -2.885607146093 | C | -5.917742735391 | -1.347270418312 | -3.938481911794 |
| C  | 0.047748901063  | 4.717643738528  | 0.849101282430  | H | -5.781667668595 | -0.995313754343 | -4.968148294977 |
| Cl | -3.124633360858 | -2.713085714542 | 0.522737232457  | H | -5.861993849429 | -2.444956920415 | -3.945232570368 |
| C  | -2.588004841736 | -2.045628823235 | -2.721544668160 | H | -6.929545585773 | -1.059987558243 | -3.618849533810 |
| C  | -3.505461239695 | -1.223493583733 | -3.438229908978 | C | 0.693857282922  | -3.579300687891 | -2.657290507852 |
| C  | -1.598459239787 | -2.789860723788 | -3.438228852122 | H | 0.774114633175  | -2.824908053965 | -1.860271464844 |
| C  | -3.179854613883 | -0.902619734675 | -4.753400866963 | H | 1.269454897390  | -4.466397596554 | -2.353347312368 |
| C  | -1.371767046279 | -2.439401877665 | -4.768756684838 | H | 1.156090627719  | -3.151318653231 | -3.556466663538 |
| C  | -2.077058091800 | -1.433001626053 | -5.418680938342 | C | -0.805443055255 | -5.104345159698 | -3.945612210294 |
| H  | -3.827281885129 | -0.209397168613 | -5.288882300873 | H | -0.279812036340 | -5.982272077139 | -3.546427155095 |
| H  | -0.567946802364 | -2.939134133669 | -5.300175485592 | H | -1.839622531127 | -5.401394023299 | -4.168889761098 |
| C  | -4.886202908853 | -0.751580305796 | -2.959679787951 | H | -0.314958458542 | -4.841726403535 | -4.889146922094 |
| C  | -0.767077304242 | -3.975918672634 | -2.896225758044 | C | -1.313628489869 | -4.603689195454 | -1.611054641013 |
| C  | 1.263524702434  | 5.452942039758  | 1.431046536384  | H | -1.089413544907 | -4.013369530374 | -0.715848098431 |
| H  | 2.140688209921  | 4.802656907071  | 1.550922380611  | H | -2.398682512736 | -4.770214009349 | -1.659630645367 |
| H  | 1.554698302656  | 6.298493861064  | 0.792722144903  | H | -0.831880624563 | -5.579143655196 | -1.458635211745 |
| H  | 1.018495851916  | 5.844261166820  | 2.428356011590  | C | -1.426605912203 | 4.301664385935  | -3.989677457239 |
| C  | -0.351346755107 | 3.581596227734  | 1.799843196542  | C | -2.386446845961 | 3.132307740057  | -3.732753316998 |
| H  | -1.120096419782 | 2.927547389178  | 1.362318909435  | H | -1.869070969575 | 2.164515077175  | -3.844954104191 |
| H  | 0.507195334122  | 2.955548997779  | 2.069436751204  | H | -2.814653355491 | 3.165404532687  | -2.720760784812 |
| H  | -0.757089473046 | 3.999396912203  | 2.733135278329  | H | -3.219938852232 | 3.157197335498  | -4.452035678333 |
| C  | -1.095538062748 | 5.743214212226  | 0.853672182966  | C | -2.187734845312 | 5.627335407001  | -3.882194150710 |
| H  | -1.180854108935 | 6.174671617441  | 1.859785489970  | H | -1.518686567872 | 6.479468926373  | -4.067126899590 |
| H  | -0.908574789986 | 6.564469432348  | 0.148749183822  | H | -2.994604314886 | 5.660120418783  | -4.627919589101 |
| H  | -2.074570474714 | 5.305400503117  | 0.617697775103  | H | -2.646353435762 | 5.771093775880  | -2.894972115348 |
| C  | 3.672271521060  | 2.532570133585  | -3.809696853017 | C | -0.902439373732 | 4.174543927463  | -5.419172145746 |
| H  | 3.548773368608  | 1.581756400022  | -3.273391176739 | H | -1.746190118210 | 4.206965829755  | -6.122501373271 |
| H  | 2.969498719270  | 2.532172015105  | -4.653815810514 | H | -0.218455747378 | 4.994325565273  | -5.680729771980 |
| H  | 4.693233690841  | 2.555987618688  | -4.220832502942 | H | -0.378249424429 | 3.221162765836  | -5.579798818999 |
| C  | 4.555280911181  | 3.728525641419  | -1.822847905969 | C | -1.718328374342 | -0.928457712794 | -6.810142889568 |
| H  | 4.644601743682  | 2.768836999548  | -1.297516752108 | C | -0.462600128418 | -1.597455387101 | -7.364453837368 |
| H  | 5.525904964049  | 3.895792760694  | -2.311431635452 | H | 0.404916647971  | -1.432703990426 | -6.709944484514 |
| H  | 4.416650619033  | 4.530969928909  | -1.082886008214 | H | -0.597942110990 | -2.679984631469 | -7.497925597684 |
| C  | 3.673039074634  | 5.031462011401  | -3.688805781116 | H | -0.226135173754 | -1.171902420853 | -8.349146451792 |
| H  | 2.995053196723  | 5.124077834146  | -4.545111083666 | C | -1.455097632153 | 0.580947223729  | -6.723552608104 |
| H  | 3.533221458182  | 5.914467465587  | -3.049079706970 | H | -2.334929585153 | 1.138162549717  | -6.371886895919 |
| H  | 4.700369292290  | 5.053951876616  | -4.078701635698 | H | -0.626835416872 | 0.782469676746  | -6.028123501228 |
| C  | -5.000851957966 | 0.773561814612  | -2.989100376802 | H | -1.182312997426 | 0.975450583126  | -7.713243778014 |
| H  | -6.016351979696 | 1.074508128094  | -2.694614539332 | C | -2.877357742428 | -1.199801436186 | -7.776481945320 |
| H  | -4.294969704693 | 1.243517268105  | -2.287836865190 | H | -3.804590463964 | -0.700852909117 | -7.464750775034 |
| H  | -4.807252064825 | 1.185103182040  | -3.988734184360 | H | -2.622624054908 | -0.831424708643 | -8.780457728512 |
| C  | -5.287946903599 | -1.260786259702 | -1.581321782411 | H | -3.081286769501 | -2.277191976787 | -7.851576659882 |
| H  | -5.175872364579 | -2.350969866421 | -1.504395594012 |   |                 |                 |                 |

TS-3B

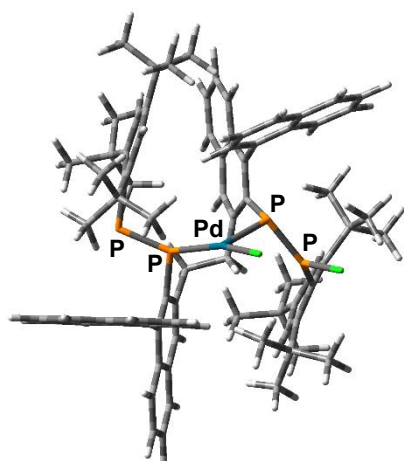

|    |                 |                 |                 |   |                 |                 |                 |
|----|-----------------|-----------------|-----------------|---|-----------------|-----------------|-----------------|
| C  | -3.430155267530 | 1.092939063185  | 1.487518570204  | H | -3.374110619322 | 8.090906959200  | 1.096960711133  |
| C  | -3.627571791290 | -0.024363482329 | 2.364498018532  | H | -3.282315156791 | 7.484469149447  | -1.302338223195 |
| C  | -4.311419113904 | 1.283341908991  | 0.391013388860  | H | -2.313006948587 | 6.177975792025  | -3.124361614376 |
| C  | -4.524526847187 | -1.011009734344 | 1.963876130292  | C | 4.852029593275  | 5.828543153344  | 0.978974368547  |
| C  | -5.187596316051 | 0.236624795318  | 0.061866698789  | C | 4.595132549573  | 4.621381886893  | 1.579958982069  |
| C  | -5.290563006738 | -0.932048940090 | 0.800789184421  | C | 3.362753801487  | 3.956821844959  | 1.370374357415  |
| H  | -4.659653111944 | -1.883339272681 | 2.594812048277  | H | 5.803987946752  | 6.330075191884  | 1.143091032281  |
| H  | -5.828795110822 | 0.357104774289  | -0.805394250468 | H | 5.337490838322  | 4.149234019870  | 2.224532149555  |
| C  | 3.944991245797  | -1.526367476961 | -1.110405564958 | C | 3.088905346076  | 2.703060723419  | 1.963379221372  |
| C  | 4.123204529749  | -2.762046093360 | -0.436197487659 | H | 3.849533089093  | 2.251554438030  | 2.605491492261  |
| C  | 4.715438537322  | -0.366507603619 | -0.754864757315 | C | -0.862349199088 | 5.805767608551  | 1.233107605530  |
| C  | 4.874876278609  | -2.734706932941 | 0.748588904143  | H | -0.182495945572 | 5.337869452650  | 1.945048582158  |
| C  | 5.466272469737  | -0.451571369751 | 0.409069147189  | C | 2.674262183449  | 5.803787823873  | -0.072495796036 |
| C  | 5.496609501978  | -1.592245451345 | 1.222540157798  | H | 1.931511780911  | 6.270296865472  | -0.717587334329 |
| H  | 4.956761164233  | -3.651919712754 | 1.324088712868  | H | -1.821684282081 | 7.007373374849  | 2.716140521173  |
| H  | 6.029025737934  | 0.416797593397  | 0.736476374978  | H | 4.089135070004  | 7.382823342506  | -0.325437740955 |
| C  | 4.829239296486  | 0.912474884578  | -1.615876544446 | C | 0.916391428420  | 2.635437386571  | 0.902365039793  |
| C  | 3.640338049623  | -4.166188958945 | -0.865067533655 | C | 0.184247389988  | 4.171767174077  | -1.963178815928 |
| C  | 6.197484193656  | -1.533485091848 | 2.574122480358  | C | 1.905247991528  | 2.039735548951  | 1.751682541653  |
| C  | -4.469075833745 | 2.586881073986  | -0.428882329504 | H | -0.667285611533 | 4.499410780915  | -3.925181449427 |
| C  | -6.296460248374 | -2.038085163089 | 0.485517390954  | H | 0.921082032297  | 3.454937899935  | -2.329930734769 |
| C  | -3.050122472939 | -0.131488271572 | 3.797058363058  | C | 1.064106843535  | -1.584473811245 | 1.336476955327  |
| P  | -1.990282909077 | 2.220572328631  | 1.845266724334  | C | 0.899518241884  | -2.285942787143 | 2.507921442736  |
| P  | 2.386311592372  | -1.276430106797 | -1.996329729522 | C | 0.219544123575  | -1.905546326628 | 0.229066056549  |
| P  | 0.322220491168  | -1.320035246795 | -1.522201914719 | C | -0.144549334973 | -3.223037145967 | 2.689745912970  |
| P  | -0.593105079053 | 1.668793950381  | 0.447156339828  | H | 1.552312819503  | -2.065441614785 | 3.357546731723  |
| Pd | -0.532123996147 | 0.858022539532  | -1.689378877502 | C | -0.855174378243 | -2.779799227357 | 0.386835819849  |
| Cl | -0.716391012418 | 0.945267397769  | -4.121738337586 | C | -1.071147189267 | -3.439067510104 | 1.629515262542  |
| Cl | 2.462880405715  | -1.397232751164 | -4.056578508343 | C | -0.344381383035 | -3.886955323186 | 3.924028314186  |
| C  | 3.879953797982  | 6.424591823790  | 0.146487184781  | C | -1.785164548775 | -2.975197576289 | -0.762957025632 |
| C  | -1.777063672795 | 6.736976152685  | 1.662626156156  | C | -2.174620583469 | -4.301928664254 | 1.846690383846  |
| C  | 2.381437416619  | 4.552609808774  | 0.527985646474  | C | -1.421181003911 | -4.720121362270 | 4.105393430323  |
| C  | -0.786521393682 | 5.438063825691  | -0.134444934176 | H | 0.366126978765  | -3.711406074047 | 4.731921267998  |
| C  | 0.152751748922  | 4.479218386540  | -0.618109715316 | C | -1.681622346941 | -4.117361999511 | -1.613994051656 |
| C  | 1.150260860105  | 3.863211670096  | 0.300394995797  | C | -2.680588421405 | -1.970136946083 | -1.070154549206 |
| C  | -0.710940170763 | 4.774886624183  | -2.872988811639 | C | -2.347239160673 | -4.926218210263 | 3.058030301435  |
| C  | -1.621647389075 | 5.699738406274  | -2.430056980186 | H | -2.882969682721 | -4.467276115424 | 1.035426940814  |
| C  | -1.679774967588 | 6.056807739462  | -1.060261658109 | H | -1.568812814037 | -5.220341225557 | 5.060720077888  |
| C  | -2.606561910841 | 7.016775553054  | -0.585652168103 | C | -2.486363674757 | -4.174593510506 | -2.790799697310 |
| C  | -2.656925702119 | 7.351512279758  | 0.745133266561  | C | -0.775464918882 | -5.175756949282 | -1.358668118844 |

|   |                 |                 |                 |   |                 |                 |                 |
|---|-----------------|-----------------|-----------------|---|-----------------|-----------------|-----------------|
| C | -3.463059855730 | -2.024752306293 | -2.243311504084 | H | 3.614042546134  | -3.808797760171 | -3.030363967132 |
| H | -2.755694153066 | -1.099086805711 | -0.416777222597 | C | 2.649435999558  | -4.725624787956 | 0.161890330577  |
| H | -3.200037142232 | -5.585018628802 | 3.212499676577  | H | 3.070167408638  | -4.772378096262 | 1.174965763439  |
| C | -3.365714676418 | -3.102185700996 | -3.087143420301 | H | 1.742973576509  | -4.105361129967 | 0.203325126293  |
| C | -2.366389594154 | -5.291842777797 | -3.652859353585 | H | 2.353652192351  | -5.745308664878 | -0.126912510857 |
| C | -0.674467556996 | -6.241648815929 | -2.219691477654 | C | 4.887627688207  | -5.072659186078 | -0.917385909710 |
| H | -0.157708137013 | -5.139173704348 | -0.462219382917 | H | 5.609046549287  | -4.698477710863 | -1.656957005201 |
| H | -4.131853825707 | -1.195730824043 | -2.474786536244 | H | 5.404460563182  | -5.160850698527 | 0.044382369662  |
| H | -3.959535053850 | -3.149978729447 | -3.999898570799 | H | 4.586570240106  | -6.084564016133 | -1.220378630007 |
| C | -1.479892247481 | -6.303673862825 | -3.377382930549 | C | -4.124855225404 | 3.844328128020  | 0.375271879322  |
| H | -2.988518523513 | -5.326982889874 | -4.547274529796 | H | -3.049387534666 | 3.977796338123  | 0.547925475617  |
| H | 0.031390826692  | -7.043462060039 | -2.007373218817 | H | -4.441737589667 | 4.734827007737  | -0.185317014906 |
| H | -1.393145854008 | -7.153558546212 | -4.051662196102 | H | -4.639576058773 | 3.855735335909  | 1.347287902168  |
| C | 2.028605822905  | -0.434252514224 | 1.300606432279  | C | -3.627764660490 | 2.544761220029  | -1.707623272942 |
| H | 3.055620780746  | -0.784064248540 | 1.473869537304  | H | -2.550606442908 | 2.499401724247  | -1.490729661646 |
| H | 2.028683251946  | 0.015839123289  | 0.300588896486  | H | -3.882561848259 | 1.666861354105  | -2.320734348501 |
| C | 1.699590187451  | 0.671059620462  | 2.333744291278  | H | -3.805074409849 | 3.448353989674  | -2.311244411576 |
| H | 0.664080540257  | 0.558762087734  | 2.674945811345  | C | -5.938684082261 | 2.774445639419  | -0.853627703955 |
| H | 2.331719746650  | 0.551035568908  | 3.225068604754  | H | -6.265832242277 | 2.055007968998  | -1.613698664322 |
| C | 3.512936627163  | 1.690066136622  | -1.785193191764 | H | -6.620996876726 | 2.704833012113  | 0.004801370592  |
| H | 3.013063829582  | 1.839542979689  | -0.816864374883 | H | -6.054982977770 | 3.771011217238  | -1.299173754629 |
| H | 3.737862397451  | 2.684769418761  | -2.198934348177 | C | -3.601847838994 | 1.039056707259  | 4.624394361516  |
| H | 2.798880518372  | 1.213925084483  | -2.468156043006 | H | -4.699688833804 | 1.006205119387  | 4.660362517375  |
| C | 5.821595299921  | 1.911633043979  | -1.006790417917 | H | -3.223659325590 | 0.980264263575  | 5.655281632527  |
| H | 5.915014279883  | 2.770155729736  | -1.684433766618 | H | -3.306139517353 | 2.016244627153  | 4.219117697474  |
| H | 5.476956092172  | 2.299502679972  | -0.036965876724 | C | -1.518178325575 | -0.135999421761 | 3.855636131697  |
| H | 6.825130608238  | 1.483806233082  | -0.881280467549 | H | -1.175100727296 | -0.567120681173 | 4.807900479073  |
| C | 5.393287230745  | 0.518031870969  | -2.987975772914 | H | -1.096097750510 | -0.741220424970 | 3.043850523769  |
| H | 6.381141921678  | 0.048686758154  | -2.879350748528 | H | -1.089818745379 | 0.871553127009  | 3.793990685255  |
| H | 4.744902150327  | -0.181693560671 | -3.526812359103 | C | -3.496859270970 | -1.417969448136 | 4.505138013481  |
| H | 5.509737541601  | 1.414818361162  | -3.612961759433 | H | -3.115805424135 | -2.321819075069 | 4.004689657561  |
| C | 5.503399369210  | -0.466866870923 | 3.432307833129  | H | -3.091001539186 | -1.412985872095 | 5.525444206328  |
| H | 5.547573854122  | 0.528332779613  | 2.968781264541  | H | -4.588756277737 | -1.495622737324 | 4.592379374973  |
| H | 4.444160296729  | -0.723125720314 | 3.592095791076  | C | -5.619263133014 | -3.413916498109 | 0.490220650134  |
| H | 5.987129758020  | -0.399993507293 | 4.416892347441  | H | -4.852474441323 | -3.482886783774 | -0.295700293198 |
| C | 7.672728759780  | -1.163462394805 | 2.383256753266  | H | -5.140983642749 | -3.641058852861 | 1.453302775647  |
| H | 8.176930143736  | -1.122999510548 | 3.358923974530  | H | -6.368543168278 | -4.196309479676 | 0.303244829359  |
| H | 8.187243311018  | -1.912387478881 | 1.765563762451  | C | -7.386713015868 | -2.013706609117 | 1.566658871494  |
| H | 7.799153450805  | -0.184085951194 | 1.904213772170  | H | -7.894654212708 | -1.039120344055 | 1.586194488332  |
| C | 6.128067505841  | -2.861122072098 | 3.324931878988  | H | -8.140568842422 | -2.787849016989 | 1.362694990796  |
| H | 5.089662664600  | -3.170206029727 | 3.511715917799  | H | -6.974931344838 | -2.200313137495 | 2.567734703866  |
| H | 6.638140854613  | -3.668522058156 | 2.781418357231  | C | -6.974322949455 | -1.848460166629 | -0.870256306650 |
| H | 6.622817244860  | -2.755683132290 | 4.299558725718  | H | -7.670110323657 | -2.679371424346 | -1.049717034943 |
| C | 3.003290558276  | -4.284460070910 | -2.251442715794 | H | -7.558351435102 | -0.918879088244 | -0.914336464682 |
| H | 2.926070774270  | -5.351883963282 | -2.502445204919 | H | -6.246934332587 | -1.841320732392 | -1.693886895046 |
| H | 1.985046185802  | -3.881809632850 | -2.302667328946 |   |                 |                 |                 |

TS-4B

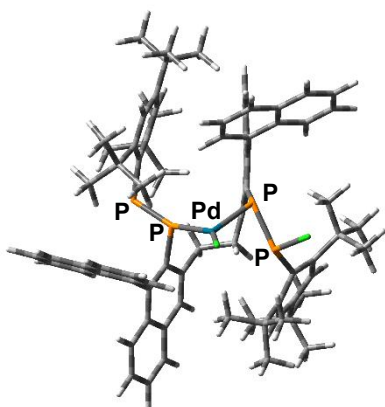

|   |                 |                 |                 |   |                 |                 |                 |
|---|-----------------|-----------------|-----------------|---|-----------------|-----------------|-----------------|
| C | -2.603393021393 | 2.500987576686  | 1.119710457687  | H | 1.449243046173  | -6.620409862260 | -2.735660332810 |
| C | -3.331724412527 | 1.698591090293  | 2.060699685591  | C | 1.484179969836  | -6.451835345538 | -0.066798275978 |
| C | -3.278541524799 | 3.046891635051  | -0.006988021898 | H | 0.807718437321  | -7.211853196224 | -0.478516982229 |
| C | -4.608877599505 | 1.280158190061  | 1.696608775538  | H | 2.462370037499  | -6.931004667615 | 0.068109942488  |
| C | -4.574857567335 | 2.587601031981  | -0.279156280669 | H | 1.092834984549  | -6.162339697707 | 0.919042147137  |
| C | -5.241945324797 | 1.668977436167  | 0.518205030396  | C | 4.451557812788  | -1.518478581301 | -3.458273009913 |
| H | -5.157627227921 | 0.629217623656  | 2.368519711773  | H | 5.115466014762  | -0.891870899099 | -4.068881462125 |
| H | -5.084675962495 | 2.971198922797  | -1.155990993704 | H | 4.658805134717  | -2.570343851929 | -3.702387098332 |
| C | -2.733478811752 | 4.173711605599  | -0.916025794876 | H | 3.431142809183  | -1.286159935527 | -3.782350818337 |
| C | -6.658973385675 | 1.180174871896  | 0.226926305337  | C | 6.239734816063  | -1.268484376459 | -1.806381713084 |
| C | -2.880229244009 | 1.391786223015  | 3.511056427987  | H | 6.693096192440  | -0.639795208909 | -2.583339512719 |
| C | 2.824176915680  | -2.977687990926 | -1.292183986243 | H | 6.578189278604  | -0.863320529392 | -0.844318195202 |
| C | 2.511779428806  | -4.167033665947 | -0.563996331351 | H | 6.639694590714  | -2.285663578883 | -1.917736917153 |
| C | 4.051103073105  | -2.284250616340 | -1.042020967162 | C | 4.265853519142  | 0.194988068106  | -1.618116400574 |
| C | 3.278145607631  | -4.431361107605 | 0.571694968971  | H | 4.835904804160  | 0.924298174590  | -2.214531992753 |
| C | 4.745434841417  | -2.615468665575 | 0.122069193237  | H | 3.197852974702  | 0.361820034262  | -1.816738531022 |
| C | 4.337987467828  | -3.626049857531 | 0.985932326481  | H | 4.450621671668  | 0.406898353152  | -0.554827049532 |
| H | 3.029899272304  | -5.294711493978 | 1.176619860969  | C | -3.878499739764 | 4.922866097930  | -1.619079370670 |
| H | 5.641454724523  | -2.053987406527 | 0.372007047104  | H | -4.374750921630 | 4.316731512161  | -2.387940678333 |
| C | 4.708570900973  | -1.229388870837 | -1.971529151234 | H | -4.638419014315 | 5.278109468999  | -0.909611774192 |
| C | 5.089060977256  | -3.867573581223 | 2.290580665342  | H | -3.461207833628 | 5.798570544159  | -2.132755230633 |
| C | 1.534970951221  | -5.266144647596 | -1.039056065976 | C | -1.990144075542 | 5.242662791447  | -0.106478029711 |
| C | 4.379177046609  | -4.879363324286 | 3.188631606775  | H | -1.034711880587 | 4.900821896202  | 0.315189317972  |
| H | 4.347429072391  | -5.882237945691 | 2.741713275913  | H | -1.736101050126 | 6.089202171600  | -0.759894891300 |
| H | 4.918650246778  | -4.964835711050 | 4.141384632959  | H | -2.612919380725 | 5.620436038622  | 0.717210784085  |
| H | 3.348149178463  | -4.567352118845 | 3.412899107374  | C | -1.830070439993 | 3.621589982388  | -2.023550398082 |
| C | 5.204113676074  | -2.551972926822 | 3.069847234865  | H | -0.896694735820 | 3.199411035221  | -1.635730401168 |
| H | 5.749240442924  | -1.779527695687 | 2.510800124392  | H | -2.344795485891 | 2.832942831489  | -2.594709635423 |
| H | 4.207135753150  | -2.155571103780 | 3.318246751850  | H | -1.556390059874 | 4.426264021347  | -2.723098755274 |
| H | 5.742992200771  | -2.720490307173 | 4.012569565145  | C | -7.138606234925 | 1.568906261906  | -1.170808712138 |
| C | 6.492337489227  | -4.396266406615 | 1.969896856845  | H | -8.147995362891 | 1.167584040668  | -1.334463189189 |
| H | 7.049437574282  | -4.579162182360 | 2.899818309791  | H | -7.197327012604 | 2.658231580012  | -1.300755201050 |
| H | 6.435165889714  | -5.342888396857 | 1.414735051856  | H | -6.486332539232 | 1.159269340184  | -1.955200083232 |
| H | 7.069202604807  | -3.683417832885 | 1.365654981341  | C | -7.608146305462 | 1.816941600712  | 1.251680044021  |
| C | 0.078148178113  | -4.831431965276 | -1.217464446820 | H | -7.575851903967 | 2.913608116440  | 1.184824260885  |
| H | -0.326841917181 | -4.425885505723 | -0.279123486520 | H | -8.642150332012 | 1.493599886701  | 1.063402763559  |
| H | -0.074989744697 | -4.100500176598 | -2.017464262471 | H | -7.348435571732 | 1.533089779395  | 2.280604678728  |
| H | -0.525459897578 | -5.709968945100 | -1.485926754837 | C | -6.739609551875 | -0.346845177927 | 0.348250977852  |
| C | 2.092154860636  | -5.809039135777 | -2.365042672210 | H | -6.079634979669 | -0.837853350644 | -0.381767439491 |
| H | 2.146484326549  | -5.036800108040 | -3.140250093534 | H | -6.464983298492 | -0.701966175490 | 1.351145320434  |
| H | 3.102731802060  | -6.215741653098 | -2.218531527654 | H | -7.769060496641 | -0.679877928754 | 0.154370609646  |

|   |                 |                 |                 |    |                 |                 |                 |
|---|-----------------|-----------------|-----------------|----|-----------------|-----------------|-----------------|
| C | -3.903228557150 | 0.532611001117  | 4.266830516488  | C  | 2.029650175127  | 1.878130197356  | 0.861175121671  |
| H | -4.023239305359 | -0.462582475060 | 3.811396216474  | C  | 4.737198785199  | 1.967545450451  | 1.628692294865  |
| H | -3.541723818158 | 0.383084555310  | 5.292647686640  | H  | 4.277635718958  | 0.228690585308  | 2.824365917183  |
| H | -4.889068017148 | 1.010539753860  | 4.339015598694  | C  | 2.833232819673  | 2.904741890763  | 0.385623536652  |
| C | -2.778368696984 | 2.722004993775  | 4.272208525836  | C  | 4.210487790766  | 2.966923723611  | 0.761053289990  |
| H | -2.483380184840 | 2.534772775003  | 5.314762492270  | C  | 6.110692227809  | 1.995319791788  | 1.968550224737  |
| H | -2.034070018012 | 3.401517553766  | 3.835904852260  | C  | 5.084523132294  | 3.973408753575  | 0.277400622170  |
| H | -3.747066065843 | 3.240646538895  | 4.278596415408  | C  | 6.934292456410  | 2.976798881010  | 1.475184708674  |
| C | -1.553710248983 | 0.630934484402  | 3.607699646806  | H  | 6.500205051443  | 1.219970278947  | 2.629038420299  |
| H | -1.458982375565 | 0.153836119313  | 4.594336445833  | C  | 6.413729871305  | 3.976173558409  | 0.624603617148  |
| H | -1.495674826941 | -0.160425411959 | 2.849135186922  | H  | 4.691691455269  | 4.744170068632  | -0.383721518720 |
| H | -0.684306352240 | 1.288826999964  | 3.492892765369  | H  | 7.990290490258  | 2.988403297811  | 1.738716761363  |
| C | -4.399789910154 | -3.232552403276 | 3.234676109794  | H  | 7.072340642839  | 4.752557132301  | 0.239801700066  |
| C | -3.905619286850 | -5.274619365928 | -1.862201458223 | C  | 2.286939173929  | 3.954452218172  | -0.518367725049 |
| C | -2.589737861388 | -2.575071869333 | 1.759703274591  | C  | 1.810546491083  | 5.188752795776  | 0.019502583705  |
| C | -3.591346216007 | -2.911351527439 | -1.397901874825 | C  | 2.280031203891  | 3.757049454951  | -1.882583088536 |
| C | -3.045933426753 | -1.841953665080 | -0.622479568650 | C  | 1.320774039299  | 6.186779195284  | -0.875388920960 |
| C | -2.107132733850 | -2.101773185076 | 0.507085238509  | C  | 1.802560518433  | 5.462470487819  | 1.410755206698  |
| C | -4.013880517148 | -0.230544127300 | -2.163771330242 | C  | 1.775605139396  | 4.739071832104  | -2.762669830685 |
| C | -4.531431003074 | -1.239550571404 | -2.935711924977 | H  | 2.664533975238  | 2.822680893281  | -2.292773950309 |
| C | -4.348060640685 | -2.595761002682 | -2.566913984946 | C  | 0.848646680199  | 7.413199606334  | -0.348251907738 |
| C | -4.881357890219 | -3.648381259790 | -3.350313817221 | C  | 1.307161428454  | 5.928969322271  | -2.269005714564 |
| C | -4.668379257324 | -4.960161695141 | -3.007560628947 | C  | 1.331371763400  | 6.660723386620  | 1.891616626217  |
| H | -5.080933739780 | -5.760289557172 | -3.619217874126 | H  | 2.176886296328  | 4.707595823782  | 2.101865113506  |
| H | -5.460890365061 | -3.392614288127 | -4.237429588273 | H  | 1.762459016449  | 4.534459855741  | -3.831795218089 |
| H | -5.092300733854 | -1.015210984485 | -3.843247506656 | C  | 0.850404101599  | 7.647912441868  | 1.004745716925  |
| C | -3.466330283694 | -3.520084718974 | 4.255671602459  | H  | 0.477226320035  | 8.167643996497  | -1.042587042820 |
| C | -2.122768093032 | -3.333398745043 | 4.039723911639  | H  | 0.918597719422  | 6.697037109194  | -2.938362691378 |
| C | -1.651194120758 | -2.852565375577 | 2.794933155816  | H  | 1.332626398933  | 6.852782628654  | 2.963100952850  |
| H | -3.817815195435 | -3.884638941016 | 5.219086030864  | H  | 0.482670631878  | 8.594330280632  | 1.397084368899  |
| H | -1.398805613020 | -3.539004733003 | 4.828053444534  | C  | 2.551950688017  | 0.893726717603  | 1.763134337480  |
| C | -0.283425972262 | -2.554821458906 | 2.584193969809  | C  | 1.685933950331  | -0.204169721008 | 2.310653345607  |
| H | 0.410298424307  | -2.691866449313 | 3.417847175939  | H  | 0.683785203341  | 0.189671260279  | 2.508061414599  |
| C | -3.380252931617 | -4.275978783184 | -1.078517573897 | H  | 2.078988039616  | -0.526930745573 | 3.285570064031  |
| H | -2.793997212888 | -4.530491016933 | -0.196054988157 | C  | 1.565098566216  | -1.431245355548 | 1.374459340884  |
| C | -3.971521417311 | -2.770374746028 | 2.014275957470  | H  | 2.307379482195  | -2.186319240192 | 1.668528542345  |
| H | -4.689879572372 | -2.550016686883 | 1.225262284460  | H  | 1.829971050621  | -1.129069402638 | 0.355349747825  |
| H | -3.731719229010 | -6.316541840229 | -1.598538266343 | P  | 0.316088863049  | 1.672131978044  | 0.198016999116  |
| H | -5.462850516499 | -3.376335546595 | 3.418677326610  | P  | -0.809253630413 | 2.803551581062  | 1.491372058296  |
| C | -0.741785679109 | -1.853284481217 | 0.325749794560  | P  | -0.379452773373 | -1.444476685863 | -1.425730102574 |
| C | -3.286506008412 | -0.535663141323 | -0.995203415107 | Pd | 0.544328642131  | 0.624304081020  | -1.843259657303 |
| C | 0.177095239459  | -2.005434469140 | 1.411328332893  | Cl | 0.855359481554  | 1.307840212207  | -4.202779053532 |
| H | -4.152204586349 | 0.813074273810  | -2.445773638816 | P  | 1.636395764043  | -1.917488648393 | -2.204702489810 |
| H | -2.860069793665 | 0.275465767088  | -0.401561345750 | Cl | 1.052948937752  | -2.816431493347 | -4.032361246125 |
| C | 3.874594082021  | 0.963340104359  | 2.124084464486  |    |                 |                 |                 |

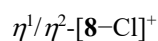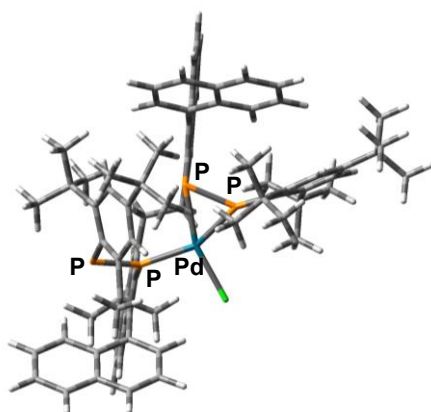

|   |             |             |             |   |             |             |             |
|---|-------------|-------------|-------------|---|-------------|-------------|-------------|
| C | -4.38918200 | -3.03474700 | 5.35048500  | H | -2.90320700 | 3.09108500  | 4.53099100  |
| C | -5.96665800 | -0.33971300 | 0.49277300  | C | -7.24033900 | -0.99922600 | -3.62203700 |
| C | -2.86014400 | -2.20092900 | 3.66359400  | H | -1.72823100 | 0.90973900  | 4.29252400  |
| C | -4.27160200 | 0.37462300  | 2.07656700  | C | 3.85231600  | -3.89377300 | 1.34975000  |
| C | -3.08166400 | 0.14381100  | 2.82942300  | C | 3.65536000  | -1.74725700 | 0.26944900  |
| C | -2.39128000 | -1.17625700 | 2.78885900  | C | 5.04416100  | -4.16014900 | 0.63834300  |
| C | -3.29107000 | 2.34460300  | 3.83918000  | H | 3.48813800  | -4.64234300 | 2.05667200  |
| C | -4.43447400 | 2.59081900  | 3.11997600  | C | 4.81710600  | -1.96990600 | -0.45670700 |
| C | -4.95153100 | 1.62055200  | 2.22736200  | C | 5.53868100  | -3.18990200 | -0.28011300 |
| C | -6.13783200 | 1.85133300  | 1.48664400  | C | 5.75552500  | -5.37010000 | 0.82012600  |
| C | -6.63397900 | 0.89616800  | 0.63402500  | C | 6.73003700  | -3.47717600 | -0.99425900 |
| H | -7.54377100 | 1.08693000  | 0.06588900  | C | 6.90935100  | -5.61629900 | 0.11886400  |
| H | -6.64706800 | 2.80761600  | 1.60693000  | H | 5.36646500  | -6.10207900 | 1.52767700  |
| H | -4.96386500 | 3.53799300  | 3.22616200  | C | 7.39858200  | -4.66047400 | -0.79810800 |
| C | -3.73465000 | -4.28604900 | 5.33598600  | H | 7.11134900  | -2.74704700 | -1.70592700 |
| C | -2.66206200 | -4.49414000 | 4.50544600  | H | 7.44955600  | -6.54969600 | 0.26530200  |
| C | -2.20173000 | -3.46175500 | 3.65452900  | H | 8.31162600  | -4.86519400 | -1.35378800 |
| H | -4.08348700 | -5.08413000 | 5.98835300  | C | 5.31165100  | -0.97256200 | -1.44490300 |
| H | -2.14638100 | -5.45387200 | 4.48884800  | C | 6.38117800  | -0.08323600 | -1.12283500 |
| C | -1.09159200 | -3.64756800 | 2.80285800  | C | 4.74722900  | -0.93727300 | -2.70175700 |
| H | -0.57924700 | -4.61152500 | 2.82718800  | C | 6.85096900  | 0.81776400  | -2.12514100 |
| C | -4.81570000 | -0.59390100 | 1.19734800  | C | 6.97665000  | -0.03906800 | 0.16294400  |
| H | -4.31676800 | -1.55810100 | 1.09760300  | C | 5.20603100  | -0.03415600 | -3.68467700 |
| C | -3.96374300 | -2.01496200 | 4.53561600  | H | 3.92494000  | -1.61256900 | -2.93670400 |
| H | -4.47332200 | -1.05338100 | 4.55577200  | C | 7.89603400  | 1.71836000  | -1.80669300 |
| H | -6.36447400 | -1.10017200 | -0.17875200 | C | 6.24282000  | 0.81793300  | -3.40520500 |
| H | -5.23699900 | -2.87883400 | 6.01450900  | C | 7.97960900  | 0.85752500  | 0.44486400  |
| C | -1.31034700 | -1.40910300 | 1.94193000  | H | 6.62481600  | -0.72394000 | 0.93437700  |
| C | -2.61810700 | 1.11532000  | 3.69479800  | H | 4.72758600  | -0.02400300 | -4.66286500 |
| C | -3.24133800 | -0.63161800 | -1.98671500 | C | 8.44650600  | 1.74433400  | -0.54894000 |
| C | -3.92161500 | 0.53658600  | -2.40346000 | H | 8.24589900  | 2.40215400  | -2.58064400 |
| C | -3.79085400 | -1.92963000 | -2.23925900 | H | 6.60936300  | 1.51764600  | -4.15677500 |
| C | -5.21118600 | 0.38722400  | -2.91617300 | H | 8.42044300  | 0.88237200  | 1.43978500  |
| C | -5.07005100 | -1.98167400 | -2.77032500 | H | 9.24349800  | 2.44748000  | -0.31431900 |
| C | -5.82388200 | -0.84498700 | -3.08326200 | P | 2.69831500  | -0.20101100 | 0.05525600  |
| H | -5.74735300 | 1.28821400  | -3.20042800 | P | 3.64226700  | 1.24002900  | 1.14572700  |
| H | -5.50882700 | -2.95727000 | -2.95865700 | C | 2.40873500  | 2.61949000  | 1.03895700  |
| C | -3.00564200 | -3.22678200 | -2.02749800 | C | 2.22680000  | 3.38108600  | -0.14298000 |
| C | -3.35854200 | 1.95695000  | -2.35156400 | C | 1.58173100  | 2.85763500  | 2.18253300  |
| C | -0.62169100 | -2.66862200 | 1.95943800  | C | 1.07669200  | 4.17957500  | -0.23242300 |



|    |             |             |             |   |             |             |             |
|----|-------------|-------------|-------------|---|-------------|-------------|-------------|
| C  | 0.48504900  | 3.69793600  | 2.01523600  | H | 3.49817600  | 2.42827900  | 5.05582200  |
| C  | 0.18045800  | 4.33759100  | 0.81273900  | C | 1.69887300  | 0.82561500  | 3.76058500  |
| H  | 0.89935000  | 4.72531100  | -1.15368900 | H | 0.71944100  | 0.50333800  | 3.36971800  |
| H  | -0.16220500 | 3.89237200  | 2.86349300  | H | 2.47798600  | 0.24771100  | 3.24972300  |
| C  | 3.22474300  | 3.48585300  | -1.32057900 | H | 1.74069900  | 0.54860400  | 4.82327800  |
| C  | -1.02148000 | 5.27341100  | 0.74302600  | C | 0.95068700  | 2.97780600  | 4.65365400  |
| C  | 1.88018500  | 2.34159900  | 3.61143600  | H | 1.25509300  | 2.63668700  | 5.65137600  |
| C  | 3.15257500  | -2.72433400 | 1.18699300  | H | 1.00534400  | 4.07451900  | 4.64821500  |
| C  | 1.87702900  | -2.51273600 | 1.95272700  | H | -0.09857400 | 2.68026100  | 4.51498300  |
| H  | 1.75532200  | -1.45502300 | 2.22883000  | C | -1.85431700 | 1.95187700  | -2.15187200 |
| H  | 1.91920000  | -3.06814500 | 2.90111400  | H | -1.43142500 | 2.96880500  | -2.14941200 |
| C  | 0.63017500  | -2.97585300 | 1.18406800  | H | -1.58053200 | 1.61233800  | -1.12936400 |
| H  | 0.69996500  | -4.06197700 | 1.02527300  | H | -1.31196000 | 1.39095100  | -2.92663400 |
| H  | 0.62121300  | -2.52607800 | 0.17786400  | C | -4.03338900 | 2.71875200  | -1.20795100 |
| P  | -0.90337800 | 0.05197300  | 0.87287800  | H | -3.65708200 | 3.75052900  | -1.16149400 |
| Pd | 0.58001300  | -0.39487600 | -1.01507300 | H | -5.12123400 | 2.76118000  | -1.34771500 |
| Cl | 1.27897700  | -0.76298000 | -3.28753300 | H | -3.84620700 | 2.23666100  | -0.23601400 |
| P  | -1.66310500 | -0.51526100 | -1.08758800 | C | -3.60806900 | 2.68819900  | -3.67914700 |
| C  | 4.67994700  | 3.25000100  | -0.90110300 | H | -4.67182200 | 2.86934100  | -3.86876800 |
| H  | 4.92241800  | 2.19899000  | -0.69735600 | H | -3.11671900 | 3.67028600  | -3.64785600 |
| H  | 5.34636400  | 3.54074700  | -1.72540300 | H | -3.19617200 | 2.12631800  | -4.52773900 |
| H  | 4.95143000  | 3.85087700  | -0.02095000 | C | -7.89498600 | 0.34593500  | -3.92730600 |
| C  | 2.84665200  | 2.52280700  | -2.45034700 | H | -7.96400900 | 0.98100800  | -3.03272200 |
| H  | 2.94468300  | 1.47069000  | -2.15434600 | H | -7.35365000 | 0.89979000  | -4.70676300 |
| H  | 1.80665600  | 2.68232300  | -2.77451200 | H | -8.91679300 | 0.17820300  | -4.29197300 |
| H  | 3.50402400  | 2.68267200  | -3.31852600 | C | -7.20262800 | -1.82147500 | -4.91653600 |
| C  | 3.20443100  | 4.91318200  | -1.90200500 | H | -6.57893700 | -1.33028200 | -5.67586600 |
| H  | 3.35490400  | 5.67207600  | -1.12187900 | H | -6.81024000 | -2.83402300 | -4.75720500 |
| H  | 4.01850000  | 5.01125000  | -2.63173600 | H | -8.21878100 | -1.92033900 | -5.32245400 |
| H  | 2.27795100  | 5.14901800  | -2.43880200 | C | -8.09996300 | -1.72319700 | -2.57828600 |
| C  | -2.24735700 | 4.58666800  | 1.35245200  | H | -9.11292000 | -1.87961600 | -2.97414500 |
| H  | -2.15202900 | 4.46155600  | 2.43832400  | H | -7.69131300 | -2.70599900 | -2.30884300 |
| H  | -3.15455400 | 5.18270300  | 1.17377600  | H | -8.18940900 | -1.12604300 | -1.65890300 |
| H  | -2.40452200 | 3.58582100  | 0.92211800  | C | -3.85130700 | -4.48164200 | -2.25800700 |
| C  | -1.35147100 | 5.70230200  | -0.68541500 | H | -3.23803200 | -5.36588500 | -2.04266500 |
| H  | -0.54474600 | 6.29324400  | -1.13943600 | H | -4.72911300 | -4.51550800 | -1.59954600 |
| H  | -1.55006100 | 4.84165300  | -1.34044400 | H | -4.18571800 | -4.56479000 | -3.29979200 |
| H  | -2.25266900 | 6.33039900  | -0.68205300 | C | -1.83462800 | -3.26704900 | -3.01984500 |
| C  | -0.70168700 | 6.53905700  | 1.55059000  | H | -1.27331800 | -4.20343100 | -2.89638900 |
| H  | -1.56039400 | 7.22586100  | 1.53555600  | H | -2.20705100 | -3.22339700 | -4.05177100 |
| H  | -0.47507700 | 6.30409300  | 2.59932300  | H | -1.12068800 | -2.43982700 | -2.89002700 |
| H  | 0.16437500  | 7.06570500  | 1.12586500  | C | -2.49350400 | -3.31271800 | -0.60021700 |
| C  | 3.30413300  | 2.74532100  | 4.02173200  | H | -1.87881600 | -2.42983100 | -0.31311200 |
| H  | 4.08329700  | 2.28977200  | 3.39691900  | H | -3.30364100 | -3.36978000 | 0.14104900  |
| H  | 3.42641100  | 3.83572300  | 3.96974100  | H | -1.81625800 | -4.16741100 | -0.46399700 |

$\eta^1/\eta^1$ -[8-Cl]<sup>+</sup>

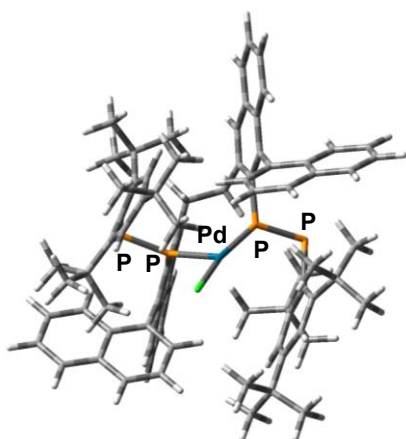

|   |             |             |             |   |             |             |             |
|---|-------------|-------------|-------------|---|-------------|-------------|-------------|
| C | 6.47551900  | -2.02288600 | 3.04692700  | C | 1.70395200  | -0.31146900 | 3.19861100  |
| C | 5.78608200  | 3.43503900  | 1.42483200  | H | 4.58513200  | -0.65901700 | -2.95362600 |
| C | 4.38236500  | -0.93494700 | 2.48357200  | C | -2.74267600 | 4.83883000  | -2.87937800 |
| C | 4.92142200  | 1.45900200  | 0.30854000  | H | 3.43193000  | -1.39363200 | -0.86206300 |
| C | 4.14310200  | 0.25961500  | 0.29722100  | C | -1.98999000 | -0.98776300 | 3.46062500  |
| C | 3.54946600  | -0.22068700 | 1.57341100  | C | -2.90370500 | -0.59117600 | 4.40258400  |
| C | 4.67974200  | -0.06189900 | -2.04845900 | C | -2.37333000 | -0.96771400 | 2.08209900  |
| C | 5.45034800  | 1.07146500  | -2.05499500 | C | -4.19097600 | -0.12649600 | 4.04507300  |
| C | 5.58283800  | 1.86231300  | -0.88818600 | H | -2.62633800 | -0.60134200 | 5.45811900  |
| C | 6.34265000  | 3.05695000  | -0.89053200 | C | -3.62072100 | -0.50426400 | 1.68238800  |
| C | 6.44092500  | 3.83114400  | 0.23911700  | C | -4.55416900 | -0.05963800 | 2.66892800  |
| H | 7.02313400  | 4.75052500  | 0.22444600  | C | -5.10565100 | 0.32285500  | 5.02661800  |
| H | 6.84134900  | 3.35327400  | -1.81365400 | C | -3.98485800 | -0.41049000 | 0.24299900  |
| H | 5.96478800  | 1.38760600  | -2.96251700 | P | -1.42398000 | -3.56520800 | 0.62290800  |
| C | 5.95067600  | -2.39668000 | 4.30389300  | C | -5.81962500 | 0.48252600  | 2.32699900  |
| C | 4.66975500  | -2.04609500 | 4.64988700  | C | -6.32698800 | 0.83391600  | 4.66420200  |
| C | 3.85545600  | -1.31660400 | 3.75117200  | H | -4.81514000 | 0.26385800  | 6.07518900  |
| H | 6.56751500  | -2.96442900 | 4.99771400  | C | -4.93696900 | -1.30721700 | -0.33079400 |
| H | 4.25542700  | -2.33041100 | 5.61669100  | C | -3.43737200 | 0.59245400  | -0.53618100 |
| C | 2.52603700  | -0.97168200 | 4.07852300  | C | -0.19721200 | -3.91419400 | -0.71831500 |
| H | 2.14463600  | -1.24667000 | 5.06406000  | C | -6.68315800 | 0.91921800  | 3.30098900  |
| C | 5.04881100  | 2.27538200  | 1.46122800  | H | -6.10153400 | 0.55834800  | 1.27842000  |
| H | 4.55340800  | 1.97764400  | 2.38511900  | H | -7.02169600 | 1.18150900  | 5.42630400  |
| C | 5.71424700  | -1.30307300 | 2.16036100  | C | -5.32588600 | -1.12015200 | -1.69163500 |
| H | 6.12465800  | -1.02118100 | 1.19238300  | C | -5.50321100 | -2.38570300 | 0.39607900  |
| H | 5.86848100  | 4.05176900  | 2.31787300  | C | -3.81399800 | 0.76003400  | -1.88530900 |
| H | 7.49162500  | -2.30771000 | 2.78173200  | H | -2.72183000 | 1.28993900  | -0.09729000 |
| C | 2.23333700  | 0.05986300  | 1.92177200  | C | -0.58061600 | -3.73397300 | -2.07822200 |
| C | 4.02393600  | -0.47285800 | -0.86564200 | C | 1.15834900  | -4.17935700 | -0.39451100 |
| P | 1.41549300  | 2.93694300  | 1.17152200  | H | -7.64820300 | 1.33676300  | 3.02114000  |
| C | 0.22586600  | 3.84328900  | 0.11796200  | C | -4.75250200 | -0.06665200 | -2.44586700 |
| C | 0.64131100  | 4.35836800  | -1.14756500 | C | -6.26533600 | -2.00889000 | -2.26836400 |
| C | -1.13763900 | 3.91558500  | 0.50861300  | C | -6.41186700 | -3.23086600 | -0.19302700 |
| C | -0.35882700 | 4.65230400  | -2.06741000 | H | -5.20523000 | -2.54313800 | 1.43239500  |
| C | -2.07887100 | 4.18866600  | -0.49089100 | H | -3.35223600 | 1.55674800  | -2.46759600 |
| C | -1.72170300 | 4.50927200  | -1.79546800 | C | 0.43474000  | -3.57132900 | -3.01671700 |
| H | -0.07038700 | 5.01573200  | -3.04952300 | C | -2.00962600 | -3.76886800 | -2.65818700 |
| H | -3.13187900 | 4.19318000  | -0.21748600 | C | 2.11385100  | -4.02335100 | -1.40770100 |
| C | -1.67834100 | 3.92088600  | 1.95774900  | C | 1.71505900  | -4.70076500 | 0.94633200  |
| C | 2.10206900  | 4.68629800  | -1.52312200 | H | -5.05719600 | 0.05855900  | -3.48497000 |

|    |             |             |             |   |             |             |             |
|----|-------------|-------------|-------------|---|-------------|-------------|-------------|
| C  | -6.79990000 | -3.04089900 | -1.53716400 | H | -3.10526000 | 2.87572300  | 3.21169600  |
| H  | -6.55251500 | -1.85753700 | -3.30910100 | C | -0.62451600 | 3.85145600  | 3.06327200  |
| H  | -6.83499200 | -4.05462300 | 0.37862200  | H | -1.11313400 | 4.04701800  | 4.02811600  |
| C  | 1.78972500  | -3.66962800 | -2.71016200 | H | 0.15870200  | 4.61464200  | 2.94531700  |
| H  | 0.15450400  | -3.37354200 | -4.04906200 | H | -0.15632100 | 2.86314200  | 3.16211700  |
| H  | 3.15788200  | -4.19512100 | -1.15836300 | C | -2.38517000 | 5.27675400  | 2.15833500  |
| H  | -7.52118400 | -3.71737800 | -1.99155000 | H | -2.75824600 | 5.34679900  | 3.18934400  |
| C  | 2.82479800  | -3.47161400 | -3.81037600 | H | -3.24139200 | 5.41394000  | 1.48852200  |
| C  | -0.57094600 | -1.27545400 | 3.85025500  | H | -1.68694800 | 6.10855600  | 1.99139600  |
| H  | -0.51594900 | -1.56757400 | 4.90671800  | C | 4.25589500  | -3.57328200 | -3.28606800 |
| H  | -0.16220500 | -2.11956600 | 3.27589200  | H | 4.47949000  | -4.57964400 | -2.90558000 |
| P  | -1.20165900 | -1.54291400 | 0.80499700  | H | 4.46065500  | -2.85507100 | -2.47945900 |
| P  | 1.19341100  | 0.95512800  | 0.71506700  | H | 4.96198200  | -3.36672400 | -4.10175200 |
| Pd | -0.15265500 | -0.18123200 | -0.72654600 | C | 2.63968100  | -4.55519400 | -4.88079200 |
| Cl | 0.49686300  | 0.92779800  | -2.67537100 | H | 1.64042300  | -4.52088000 | -5.33498100 |
| C  | 0.28752100  | -0.01464900 | 3.59899200  | H | 2.78318000  | -5.55705200 | -4.45272500 |
| H  | -0.20172800 | 0.59449100  | 2.82508800  | H | 3.37722500  | -4.41933200 | -5.68457600 |
| H  | 0.27250500  | 0.61038300  | 4.50451800  | C | 2.61976100  | -2.09086000 | -4.44623400 |
| C  | 2.83473400  | 3.46558800  | -2.08222300 | H | 2.64483100  | -1.29345200 | -3.68925600 |
| H  | 2.32141800  | 3.07129400  | -2.96904600 | H | 1.65387100  | -2.01473600 | -4.96351000 |
| H  | 2.90753200  | 2.64920400  | -1.35222200 | H | 3.40772300  | -1.89231700 | -5.18700900 |
| H  | 3.85962100  | 3.74908500  | -2.36489600 | C | -2.03445200 | -4.78039700 | -3.82114100 |
| C  | 2.87696800  | 5.25259900  | -0.32567800 | H | -1.74915400 | -5.78266200 | -3.47255100 |
| H  | 3.85154300  | 5.62925200  | -0.66530100 | H | -1.37141500 | -4.50978600 | -4.65048300 |
| H  | 3.10766500  | 4.50221400  | 0.44468000  | H | -3.05283500 | -4.84031500 | -4.22834800 |
| H  | 2.33488700  | 6.08161400  | 0.15017200  | C | -3.09699000 | -4.24632300 | -1.69538400 |
| C  | 2.15155000  | 5.77740100  | -2.60419200 | H | -4.02277300 | -4.42465400 | -2.26090600 |
| H  | 1.57388700  | 6.66708400  | -2.31772300 | H | -3.36707700 | -3.50436300 | -0.93210200 |
| H  | 1.78981200  | 5.42607600  | -3.57850900 | H | -2.83117400 | -5.19489800 | -1.20593600 |
| H  | 3.19543900  | 6.08417700  | -2.74928700 | C | -2.39164800 | -2.38381500 | -3.18707600 |
| C  | -2.61583100 | 6.32477700  | -3.24345300 | H | -1.67897700 | -2.02052100 | -3.94000400 |
| H  | -3.35296200 | 6.58599200  | -4.01595000 | H | -2.43225900 | -1.64325200 | -2.37368200 |
| H  | -1.61988100 | 6.57094800  | -3.63437900 | H | -3.38885800 | -2.41480200 | -3.65110600 |
| H  | -2.80230200 | 6.95929500  | -2.36583200 | C | 0.67819500  | -5.05335400 | 2.01205900  |
| C  | -2.46832800 | 3.99117300  | -4.12751300 | H | 1.18311500  | -5.57091100 | 2.83976700  |
| H  | -2.54676300 | 2.91611800  | -3.91086500 | H | -0.09645100 | -5.73728800 | 1.63594900  |
| H  | -1.46774000 | 4.17215000  | -4.54077800 | H | 0.19853600  | -4.17353300 | 2.46288100  |
| H  | -3.20001700 | 4.23110400  | -4.91154200 | C | 2.67904600  | -3.67254200 | 1.54465000  |
| C  | -4.17983600 | 4.58868600  | -2.42552500 | H | 2.16122400  | -2.72274200 | 1.74648100  |
| H  | -4.46678600 | 5.24687900  | -1.59373200 | H | 3.52632100  | -3.45711400 | 0.87880400  |
| H  | -4.34348900 | 3.54838400  | -2.10965900 | H | 3.09174200  | -4.04101700 | 2.49598000  |
| H  | -4.86673400 | 4.79469000  | -3.25715500 | C | 2.47053100  | -6.01400200 | 0.66796500  |
| C  | -2.68519100 | 2.79521000  | 2.19795100  | H | 2.87765100  | -6.40906600 | 1.60878900  |
| H  | -2.20806200 | 1.80705600  | 2.11524200  | H | 3.31072000  | -5.88975900 | -0.02386800 |
| H  | -3.52664500 | 2.82637800  | 1.49235100  | H | 1.79410700  | -6.77049200 | 0.24655300  |

8A-H

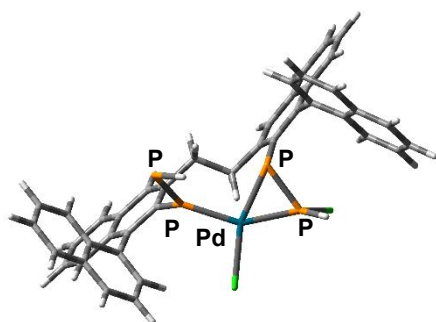

|   |             |             |             |    |             |             |             |
|---|-------------|-------------|-------------|----|-------------|-------------|-------------|
| C | 6.42756400  | 3.42464000  | 1.57567200  | C  | -6.10277900 | 4.34021200  | -1.09314500 |
| C | 6.43525700  | -1.55567300 | -1.49369100 | H  | -4.24042300 | 5.34817100  | -0.75232000 |
| C | 4.47348100  | 2.12669900  | 0.95992100  | C  | -6.77889800 | 3.09993100  | -1.11422500 |
| C | 5.27383900  | -1.13152900 | 0.59559100  | H  | -6.63294600 | 0.98364800  | -0.83198700 |
| C | 4.40245000  | -0.34535900 | 1.40817900  | H  | -6.64412100 | 5.25252400  | -1.33678600 |
| C | 3.76484800  | 0.89289300  | 0.87317000  | H  | -7.83490400 | 3.06675600  | -1.37522400 |
| C | 4.64515800  | -1.95089200 | 3.21673400  | C  | -4.66669600 | -0.55207500 | -0.15966200 |
| C | 5.44521200  | -2.74677000 | 2.43613900  | C  | -5.44292300 | -0.97936400 | 0.95898400  |
| C | 5.78004400  | -2.36061300 | 1.11521900  | C  | -4.44060200 | -1.41578700 | -1.20993700 |
| C | 6.60578800  | -3.16720600 | 0.29335700  | C  | -5.95227300 | -2.31258200 | 0.97153700  |
| C | 6.92213600  | -2.78017000 | -0.98486500 | C  | -5.68956900 | -0.14754400 | 2.08000300  |
| H | 7.55327700  | -3.41127700 | -1.60785200 | C  | -4.94668600 | -2.73442500 | -1.19296400 |
| H | 6.98415100  | -4.10576900 | 0.69896700  | H  | -3.83600300 | -1.08842600 | -2.05610000 |
| H | 5.83982000  | -3.68708500 | 2.82131700  | C  | -6.70463100 | -2.75212500 | 2.08760700  |
| C | 5.81369700  | 4.59586000  | 1.07813500  | C  | -5.68293200 | -3.17321700 | -0.12336900 |
| C | 4.55527000  | 4.53730100  | 0.53359600  | C  | -6.42181200 | -0.60453200 | 3.14915100  |
| C | 3.85728100  | 3.30731900  | 0.46079100  | H  | -5.29401500 | 0.86767500  | 2.08417500  |
| H | 6.34304400  | 5.54553000  | 1.12957600  | H  | -4.73758900 | -3.39496600 | -2.03269900 |
| H | 4.07156700  | 5.43542800  | 0.14964900  | C  | -6.93822900 | -1.91844800 | 3.15302000  |
| C | 2.55527400  | 3.22070900  | -0.07906900 | H  | -7.09168700 | -3.77121400 | 2.08416100  |
| H | 2.08156900  | 4.13886800  | -0.43301800 | H  | -6.07375900 | -4.19040000 | -0.09449500 |
| C | 5.63732000  | -0.74911800 | -0.71927600 | H  | -6.60558200 | 0.04931500  | 3.99970500  |
| H | 5.27389400  | 0.19979400  | -1.11321700 | H  | -7.51745100 | -2.26805900 | 4.00564600  |
| C | 5.77382000  | 2.21877800  | 1.51905900  | P  | -1.71067300 | -0.67592900 | 0.43618600  |
| H | 6.24849000  | 1.31818700  | 1.90538200  | P  | -2.06985900 | -1.37064700 | 2.31547700  |
| H | 6.69708200  | -1.24763600 | -2.50477000 | C  | -1.97444000 | 2.11634600  | 0.19624900  |
| H | 7.42515200  | 3.48188100  | 2.00705100  | C  | -0.52123800 | 2.21008700  | 0.56836700  |
| C | 2.49225700  | 0.84041100  | 0.30800900  | H  | -0.26419200 | 1.44137600  | 1.31433000  |
| C | 4.12224500  | -0.74836500 | 2.69746800  | H  | -0.33038800 | 3.17589100  | 1.05930100  |
| C | 1.85932400  | 2.03667100  | -0.16067100 | C  | 0.43371000  | 2.09151800  | -0.63158400 |
| H | 4.39902400  | -2.24676100 | 4.23460100  | H  | 0.28911300  | 2.96549100  | -1.28270500 |
| H | 3.46240700  | -0.13511000 | 3.31185600  | H  | 0.17056900  | 1.20970700  | -1.23812500 |
| C | -2.68235700 | 3.25362700  | -0.10685500 | P  | 1.81428000  | -0.89615200 | 0.26333200  |
| C | -2.65930600 | 0.86199700  | 0.15867800  | Pd | -0.10333900 | -1.21196500 | -1.16726000 |
| C | -4.05350800 | 3.21641200  | -0.45263300 | Cl | -1.44877000 | -1.98501100 | -3.02638100 |
| H | -2.18100000 | 4.22305200  | -0.06594000 | P  | 2.10632900  | -1.38047800 | -1.81898000 |
| C | -4.00751200 | 0.78061700  | -0.15688900 | Cl | 3.05996800  | 0.00453900  | -2.99784700 |
| C | -4.73508400 | 1.96473500  | -0.47095600 | H  | 2.87300200  | -2.54033100 | -2.03509000 |
| C | -4.76996200 | 4.39570200  | -0.76986700 | H  | -1.12580200 | -2.42608700 | 2.13603600  |
| C | -6.11124500 | 1.93939200  | -0.81094500 |    |             |             |             |

## 8A-Me

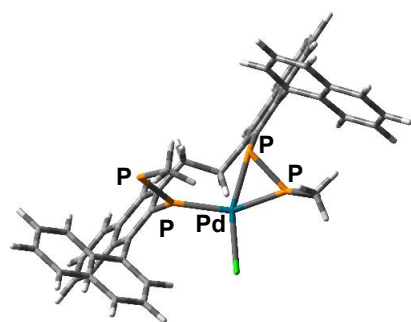

|   |             |             |             |    |             |             |             |
|---|-------------|-------------|-------------|----|-------------|-------------|-------------|
| C | 6.41599700  | 3.74428700  | 1.16397800  | H  | -6.65006800 | 1.19949900  | -0.99058800 |
| C | 6.45724000  | -1.42008700 | -1.46274400 | H  | -6.60175700 | 5.48747200  | -1.28288100 |
| C | 4.46141700  | 2.36428000  | 0.76279300  | H  | -7.80684400 | 3.31729500  | -1.48501200 |
| C | 5.33212600  | -0.88765700 | 0.62285500  | C  | -4.73530200 | -0.38640100 | -0.31882000 |
| C | 4.46772500  | -0.06554400 | 1.40700500  | C  | -5.60045300 | -0.86853900 | 0.70828100  |
| C | 3.77654500  | 1.11493600  | 0.81078300  | C  | -4.45712200 | -1.18185200 | -1.41023700 |
| C | 4.80678500  | -1.53632400 | 3.31330400  | C  | -6.15147400 | -2.17905800 | 0.58348200  |
| C | 5.59653700  | -2.36983700 | 2.56269500  | C  | -5.90004100 | -0.11531300 | 1.87125100  |
| C | 5.88120500  | -2.06757200 | 1.20838700  | C  | -5.00653200 | -2.47692500 | -1.53060600 |
| C | 6.70439200  | -2.90884500 | 0.41971100  | H  | -3.77759400 | -0.81823900 | -2.18183500 |
| C | 6.98493400  | -2.59773600 | -0.88806400 | C  | -6.99465600 | -2.67322000 | 1.60792300  |
| H | 7.61873800  | -3.25267100 | -1.48300200 | C  | -5.83503800 | -2.96451600 | -0.55366100 |
| H | 7.11437900  | -3.81003700 | 0.87603100  | C  | -6.71796800 | -0.62514700 | 2.85086000  |
| H | 6.02435700  | -3.27320400 | 2.99746900  | H  | -5.47021200 | 0.87970800  | 1.98337700  |
| C | 5.74988100  | 4.86110000  | 0.61183400  | H  | -4.75827900 | -3.08127300 | -2.40113800 |
| C | 4.46488300  | 4.73597900  | 0.14661400  | C  | -7.27556400 | -1.91493400 | 2.71744800  |
| C | 3.79261900  | 3.49153900  | 0.21041900  | H  | -7.41317800 | -3.67393300 | 1.49833000  |
| H | 6.25984600  | 5.82123000  | 0.55859600  | H  | -6.26276300 | -3.96415700 | -0.63215000 |
| H | 3.93948300  | 5.59127300  | -0.27823900 | H  | -6.93738800 | -0.03175300 | 3.73668500  |
| C | 2.46538400  | 3.34070900  | -0.24501500 | H  | -7.92360000 | -2.30721100 | 3.49912600  |
| H | 1.95219200  | 4.21973500  | -0.64073500 | P  | -1.82554000 | -0.58126800 | 0.50025200  |
| C | 5.65287700  | -0.58581600 | -0.72388400 | P  | -2.29350800 | -1.19201800 | 2.38396000  |
| H | 5.25286800  | 0.32378100  | -1.17052300 | C  | -2.02637000 | 2.22724900  | 0.27393500  |
| C | 5.78787200  | 2.52566500  | 1.23938300  | C  | -0.56771600 | 2.29114800  | 0.62887800  |
| H | 6.30564300  | 1.66911200  | 1.66830300  | H  | -0.31178600 | 1.52680000  | 1.37949300  |
| H | 6.68878600  | -1.17192600 | -2.49740400 | H  | -0.34424600 | 3.26138600  | 1.09676700  |
| H | 7.43433100  | 3.85284600  | 1.53262800  | C  | 0.34621300  | 2.13417500  | -0.59836000 |
| C | 2.47588100  | 0.99563500  | 0.32364900  | H  | 0.15096100  | 2.97149400  | -1.28405600 |
| C | 4.24118700  | -0.38345900 | 2.72977800  | H  | 0.08481600  | 1.21619500  | -1.15023000 |
| C | 1.79277000  | 2.14140500  | -0.19494600 | P  | 1.80225200  | -0.73927300 | 0.46768400  |
| H | 4.60110900  | -1.76488500 | 4.35717500  | Pd | -0.09502400 | -1.23067000 | -0.96768400 |
| H | 3.58687200  | 0.25678300  | 3.32213400  | Cl | -1.32576500 | -2.23049900 | -2.80725700 |
| C | -2.71086100 | 3.38530800  | -0.00425900 | P  | 2.10876100  | -1.47258400 | -1.52949700 |
| C | -2.72498200 | 0.98364400  | 0.18177800  | Cl | 2.97124100  | -0.20501100 | -2.90371100 |
| C | -4.07118600 | 3.38081800  | -0.38897100 | C  | 2.99875500  | -3.04916000 | -1.71079500 |
| H | -2.19448100 | 4.34453700  | 0.07424400  | H  | 4.07845300  | -2.89054500 | -1.59730700 |
| C | -4.05935400 | 0.93352300  | -0.19702200 | H  | 2.63189700  | -3.71452500 | -0.91965700 |
| C | -4.76147800 | 2.13876400  | -0.49331400 | H  | 2.77534900  | -3.48648400 | -2.68962000 |
| C | -4.76232100 | 4.58223400  | -0.67833500 | C  | -1.21492900 | -2.70874600 | 2.47685400  |
| C | -6.12035500 | 2.14641900  | -0.89839200 | H  | -0.68358500 | -2.92373100 | 1.54077700  |
| C | -6.07994000 | 4.55822000  | -1.06168000 | H  | -0.47945700 | -2.56516500 | 3.27834300  |
| H | -4.22425900 | 5.52631500  | -0.59268000 | H  | -1.83762100 | -3.57137300 | 2.74145900  |
| C | -6.76366000 | 3.32753200  | -1.17476400 |    |             |             |             |

## 8A-Ph

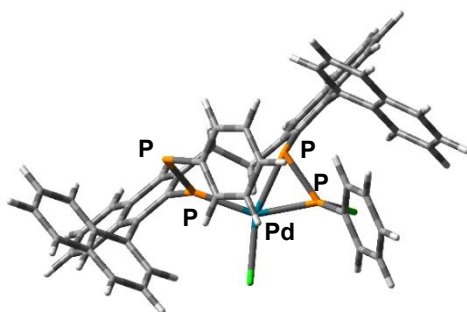

|   |             |             |             |    |             |             |             |
|---|-------------|-------------|-------------|----|-------------|-------------|-------------|
| C | -5.58837700 | 4.92005800  | -1.38646400 | C  | 5.63403800  | 4.48552400  | 0.92767300  |
| C | -6.35093800 | -0.08946100 | 1.26125300  | C  | 6.65015300  | 1.88399300  | 1.09601500  |
| C | -3.80370000 | 3.35471500  | -0.88485800 | C  | 6.92974600  | 4.27361800  | 1.32844800  |
| C | -5.04346600 | 0.24436600  | -0.75752800 | H  | 5.22950100  | 5.49548400  | 0.86188200  |
| C | -4.02982300 | 0.92527300  | -1.49869100 | C  | 7.44077400  | 2.95964100  | 1.41591900  |
| C | -3.24795200 | 2.04181100  | -0.88960100 | H  | 7.04476100  | 0.87142200  | 1.16839800  |
| C | -4.40338800 | -0.57525000 | -3.37717100 | H  | 7.56652400  | 5.11833300  | 1.58462000  |
| C | -5.35685600 | -1.26494300 | -2.67104700 | H  | 8.46705000  | 2.80127100  | 1.74180400  |
| C | -5.70195000 | -0.87413100 | -1.35395400 | C  | 4.92900800  | -0.42861600 | 0.39281100  |
| C | -6.67754500 | -1.57928100 | -0.60658600 | C  | 5.73405600  | -0.97821200 | -0.64931100 |
| C | -6.99368400 | -1.20135400 | 0.67443000  | C  | 4.46158600  | -1.24553200 | 1.40222500  |
| H | -7.74227500 | -1.75355300 | 1.23961400  | C  | 6.02557800  | -2.37550000 | -0.62855500 |
| H | -7.16922100 | -2.43403800 | -1.07218100 | C  | 6.21452600  | -0.20179700 | -1.73482100 |
| H | -5.86642800 | -2.12164500 | -3.11257000 | C  | 4.75619600  | -2.62653600 | 1.42020200  |
| C | -4.83765300 | 5.97134900  | -0.81416500 | H  | 3.82204600  | -0.83083000 | 2.18319700  |
| C | -3.59271500 | 5.72386700  | -0.29249600 | C  | 6.80600600  | -2.93355800 | -1.67003500 |
| C | -3.04720400 | 4.41717300  | -0.31618400 | C  | 5.51755000  | -3.17952500 | 0.42378600  |
| H | -5.25022700 | 6.97829300  | -0.79110500 | C  | 6.96562000  | -0.77395000 | -2.73268900 |
| H | -3.00238300 | 6.52751700  | 0.14752800  | H  | 5.97995900  | 0.86150000  | -1.77064900 |
| C | -1.76069800 | 4.14145900  | 0.19575200  | H  | 4.36654400  | -3.24319700 | 2.22816600  |
| H | -1.17993300 | 4.97116900  | 0.60425000  | C  | 7.27014900  | -2.15209400 | -2.69887400 |
| C | -5.40541400 | 0.61906100  | 0.56043100  | H  | 7.02719600  | -4.00055200 | -1.63888300 |
| H | -4.92066800 | 1.48031900  | 1.01911900  | H  | 5.74718200  | -4.24514900 | 0.42254200  |
| C | -5.08465500 | 3.64353200  | -1.42282200 | H  | 7.32689300  | -0.16216200 | -3.55732300 |
| H | -5.66737500 | 2.83923400  | -1.86907200 | H  | 7.86742800  | -2.59315900 | -3.49477200 |
| H | -6.60852500 | 0.20940300  | 2.27612800  | P  | 2.04508800  | -0.19671800 | -0.37512600 |
| H | -6.57300700 | 5.12548600  | -1.80241800 | P  | 2.37827400  | -0.97241300 | -2.23460700 |
| C | -1.98610200 | 1.80134200  | -0.34746300 | C  | 1.03976800  | -2.23066800 | -2.13804900 |
| C | -3.74279000 | 0.52265100  | -2.78702700 | C  | 0.91575900  | -3.14408100 | -1.08141800 |
| C | -2.90815100 | -2.23344400 | 1.61008100  | C  | 0.07547600  | -2.22943400 | -3.15417800 |
| C | -3.46924100 | -2.80047700 | 0.46164600  | C  | -0.17495300 | -4.00796300 | -1.02481900 |
| C | -2.99184800 | -2.89165300 | 2.84370600  | C  | -1.01082500 | -3.09698800 | -3.09673500 |
| C | -4.12171900 | -4.02502400 | 0.55361900  | C  | -1.14140400 | -3.98116500 | -2.02791500 |
| C | -3.65545900 | -4.10856700 | 2.92403300  | H  | -0.26757100 | -4.70571100 | -0.19298800 |
| C | -4.21959600 | -4.67424800 | 1.78063400  | H  | -1.76034300 | -3.07873400 | -3.88631100 |
| H | -3.72988400 | -4.62002300 | 3.88132600  | C  | 2.62263900  | 2.54735200  | -0.13528200 |
| C | -1.20921800 | 2.88097100  | 0.18547500  | C  | 1.19459300  | 2.80373700  | -0.53221900 |
| H | -4.14652600 | -0.87185600 | -4.39231800 | H  | 0.87637600  | 2.09380900  | -1.31262400 |
| H | -2.96651400 | 1.04835000  | -3.34405600 | H  | 1.11142900  | 3.80300600  | -0.98470000 |
| C | 3.45107800  | 3.59510500  | 0.18625500  | C  | 0.21299200  | 2.73754200  | 0.65267100  |
| C | 3.15258000  | 1.22140900  | -0.06625400 | H  | 0.45633100  | 3.55445900  | 1.34722700  |
| C | 4.79242300  | 3.39701300  | 0.59304400  | H  | 0.35956700  | 1.80163800  | 1.21622500  |
| H | 3.07097000  | 4.61707700  | 0.12339800  | P  | -1.47597600 | 0.01248300  | -0.47172000 |
| C | 4.46063500  | 0.98116700  | 0.32757500  | Pd | 0.25778800  | -0.63373900 | 1.08459700  |
| C | 5.31063100  | 2.07129600  | 0.67035100  | Cl | 1.28102500  | -1.68433100 | 3.02824000  |

|    |             |             |             |
|----|-------------|-------------|-------------|
| P  | -1.98705900 | -0.68785300 | 1.49578600  |
| Cl | -2.83174100 | 0.61999200  | 2.84987200  |
| H  | -2.54256600 | -2.45046000 | 3.73355600  |
| H  | -4.73955600 | -5.62769300 | 1.84999500  |
| H  | -4.57122200 | -4.45878000 | -0.33847500 |

|   |             |             |             |
|---|-------------|-------------|-------------|
| H | -3.40626600 | -2.28329700 | -0.49548800 |
| H | -1.99004900 | -4.66213600 | -1.98573300 |
| H | 0.16455800  | -1.52839500 | -3.98523700 |
| H | 1.67781900  | -3.18255000 | -0.30138700 |

### 8A-Mes

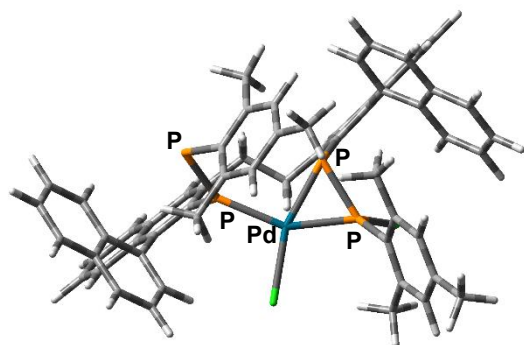

|   |             |             |             |
|---|-------------|-------------|-------------|
| C | -5.14414800 | 5.44976800  | -1.33270200 |
| C | -6.25115000 | 0.26172800  | 0.90584300  |
| C | -3.45292400 | 3.77839500  | -0.84621100 |
| C | -4.86081000 | 0.74775600  | -1.02443600 |
| C | -3.76582900 | 1.42690800  | -1.63948500 |
| C | -2.95752100 | 2.44111400  | -0.89889700 |
| C | -4.17365000 | 0.20075900  | -3.70135300 |
| C | -5.21234300 | -0.48365000 | -3.12134100 |
| C | -5.58282900 | -0.22645200 | -1.77860000 |
| C | -6.63212000 | -0.94241900 | -1.15036100 |
| C | -6.95562100 | -0.71228700 | 0.16364900  |
| H | -7.75796900 | -1.27531900 | 0.63693200  |
| H | -7.17203600 | -1.68952700 | -1.73255600 |
| H | -5.76762100 | -1.23537300 | -3.68259700 |
| C | -4.37721700 | 6.43078500  | -0.66549800 |
| C | -3.16948200 | 6.09723300  | -0.10556700 |
| C | -2.68040800 | 4.77066700  | -0.18292700 |
| H | -4.74718600 | 7.45232500  | -0.60004800 |
| H | -2.56611800 | 6.84652500  | 0.40675800  |
| C | -1.43133800 | 4.40650700  | 0.36458900  |
| H | -0.83081900 | 5.18573100  | 0.83886100  |
| C | -5.23547100 | 0.97870700  | 0.32258500  |
| H | -4.69932200 | 1.73337300  | 0.89636200  |
| C | -4.69305100 | 4.15618600  | -1.42363300 |
| H | -5.28854600 | 3.40587500  | -1.94089900 |
| H | -6.51515400 | 0.44655800  | 1.94597100  |
| H | -6.09899200 | 5.72340800  | -1.77764600 |
| C | -1.74172400 | 2.10443700  | -0.30242800 |
| C | -3.45627000 | 1.16085600  | -2.95726400 |
| C | -2.80821600 | -1.85705800 | 2.01686500  |
| C | -3.44074900 | -2.66718700 | 1.04592900  |
| C | -2.81986700 | -2.23033100 | 3.38573400  |
| C | -4.15715700 | -3.78047100 | 1.48528600  |
| C | -3.54454100 | -3.35885200 | 3.75516400  |
| C | -4.23898100 | -4.13436600 | 2.82807500  |
| H | -4.65509400 | -4.40295300 | 0.74046500  |
| H | -3.55858400 | -3.64707100 | 4.80772100  |

|   |             |             |             |
|---|-------------|-------------|-------------|
| C | -2.08368100 | -1.48641000 | 4.46172700  |
| C | -3.31683700 | -2.45936300 | -0.43046500 |
| C | -0.94013100 | 3.12272700  | 0.31581500  |
| H | -3.89768300 | 0.00972500  | -4.73749700 |
| C | -5.03069400 | -5.32475200 | 3.27144900  |
| H | -2.63179500 | 1.70009200  | -3.42499500 |
| C | 3.75348700  | 3.60068500  | 0.57863700  |
| C | 3.33696000  | 1.27464000  | 0.11557200  |
| C | 5.06738500  | 3.29463300  | 1.00438200  |
| H | 3.43090800  | 4.64403900  | 0.59267500  |
| C | 4.61651500  | 0.93022600  | 0.52305700  |
| C | 5.51362200  | 1.94094200  | 0.97682100  |
| C | 5.95307400  | 4.30314700  | 1.45551500  |
| C | 6.83077200  | 1.64629900  | 1.41100700  |
| C | 7.22406200  | 3.98777700  | 1.86639700  |
| H | 5.60306800  | 5.33526200  | 1.47097800  |
| C | 7.66585200  | 2.64618200  | 1.84474900  |
| H | 7.17145700  | 0.61199300  | 1.39920000  |
| H | 7.89644200  | 4.77061100  | 2.21265100  |
| H | 8.67457800  | 2.40574100  | 2.17533500  |
| C | 5.02673300  | -0.50068600 | 0.50333500  |
| C | 5.78802900  | -1.03237200 | -0.58018900 |
| C | 4.59844300  | -1.33562600 | 1.51326000  |
| C | 6.07689800  | -2.43042900 | -0.59766200 |
| C | 6.23217700  | -0.23331400 | -1.66391700 |
| C | 4.89483900  | -2.71657600 | 1.49696300  |
| H | 3.99206600  | -0.93114400 | 2.32382500  |
| C | 6.80040000  | -2.97043000 | -1.68876900 |
| C | 5.61912700  | -3.25201200 | 0.46430100  |
| C | 6.93098500  | -0.78804200 | -2.70899100 |
| H | 6.00538800  | 0.83267900  | -1.66253600 |
| H | 4.53247900  | -3.34650800 | 2.30782900  |
| C | 7.21944800  | -2.16975200 | -2.72265000 |
| H | 7.01536400  | -4.03924300 | -1.69158600 |
| H | 5.84828200  | -4.31748400 | 0.43531000  |
| H | 7.26209600  | -0.16017500 | -3.53427100 |
| H | 7.77155500  | -2.59838300 | -3.55707300 |

|    |             |             |             |    |             |             |             |
|----|-------------|-------------|-------------|----|-------------|-------------|-------------|
| P  | 2.16732600  | -0.04458300 | -0.37867200 | Cl | 1.39474100  | -1.53159600 | 2.99782200  |
| P  | 2.54485300  | -0.50614800 | -2.32772500 | P  | -1.88545400 | -0.35564800 | 1.57872300  |
| C  | 1.14472300  | -1.68235600 | -2.58433200 | Cl | -2.67976500 | 1.18677900  | 2.72035200  |
| C  | 1.17585000  | -2.99774200 | -2.07732700 | H  | -1.09861600 | -1.13245200 | 4.12499400  |
| C  | 0.05091400  | -1.24820700 | -3.35884000 | H  | -1.92075200 | -2.14401400 | 5.32299000  |
| C  | 0.09397100  | -3.84058000 | -2.33395300 | H  | -2.64825200 | -0.61426700 | 4.81606000  |
| C  | -1.00613300 | -2.12722200 | -3.59164400 | H  | -4.44052400 | -5.96848100 | 3.93632300  |
| C  | -1.00598300 | -3.42519300 | -3.08599400 | H  | -5.92105700 | -5.01616700 | 3.83623400  |
| H  | 0.11687700  | -4.85997200 | -1.94253500 | H  | -5.36684500 | -5.92668600 | 2.41959600  |
| H  | -1.86098100 | -1.78456800 | -4.17998700 | H  | -4.04954300 | -3.07205900 | -0.96933700 |
| C  | 2.33646800  | -3.51578500 | -1.27712500 | H  | -2.31324900 | -2.74611300 | -0.78526300 |
| C  | -2.14522400 | -4.35704900 | -3.36992000 | H  | -3.46420100 | -1.41821600 | -0.73061300 |
| C  | -0.02647700 | 0.14671200  | -3.90625500 | H  | -2.37136900 | -4.99427500 | -2.50506200 |
| C  | 2.88413300  | 2.63163100  | 0.14077700  | H  | -1.91236000 | -5.02579500 | -4.21057200 |
| C  | 1.49187600  | 3.00616800  | -0.28772200 | H  | -3.05505100 | -3.80253300 | -3.63455800 |
| H  | 1.17198900  | 2.38363500  | -1.13776100 | H  | -0.82033100 | 0.23142900  | -4.65866700 |
| H  | 1.48677500  | 4.04282600  | -0.65572900 | H  | 0.91375200  | 0.46867400  | -4.37592900 |
| C  | 0.45113700  | 2.89878200  | 0.84172600  | H  | -0.24884800 | 0.87579800  | -3.10927700 |
| H  | 0.68370300  | 3.65911600  | 1.60134800  | H  | 3.30307500  | -3.25879000 | -1.73602000 |
| H  | 0.54047800  | 1.92497900  | 1.34949000  | H  | 2.35787700  | -3.09271600 | -0.26163700 |
| P  | -1.35674900 | 0.28146200  | -0.43046000 | H  | 2.28675700  | -4.60675200 | -1.17882800 |
| Pd | 0.36465000  | -0.42782700 | 1.08700200  |    |             |             |             |

### $\delta_{E-H}$

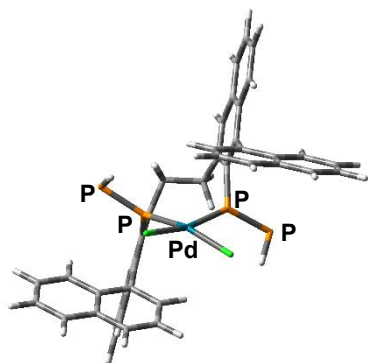

|   |             |             |             |   |             |             |             |
|---|-------------|-------------|-------------|---|-------------|-------------|-------------|
| C | -6.29988100 | -2.32624400 | 2.22942300  | C | -2.72988900 | -3.69383700 | 0.44342800  |
| C | -5.78047100 | 0.99986900  | -2.59245500 | H | -2.48526300 | -4.75695800 | 0.49049100  |
| C | -4.24351300 | -1.85957800 | 1.03264200  | C | -5.00002100 | 0.37763700  | -1.64783600 |
| C | -4.45542900 | 1.10858200  | -0.56311200 | H | -4.79600200 | -0.69053100 | -1.72492600 |
| C | -3.62306000 | 0.50490600  | 0.42568800  | C | -5.44414200 | -1.42330600 | 1.64885200  |
| C | -3.33793300 | -0.95609200 | 0.40378100  | H | -5.68224300 | -0.36083900 | 1.65457400  |
| C | -3.41614600 | 2.64357300  | 1.56543500  | H | -6.18925300 | 0.42536300  | -3.42158200 |
| C | -4.21765600 | 3.24407800  | 0.62669000  | H | -7.21938100 | -1.97882000 | 2.69631100  |
| C | -4.74523900 | 2.50182500  | -0.45824600 | C | -2.19177600 | -1.44234000 | -0.20779700 |
| C | -5.55713400 | 3.11142500  | -1.44634900 | C | -3.11788700 | 1.26950000  | 1.46066300  |
| C | -6.06170800 | 2.38025200  | -2.49270600 | P | -1.54207100 | -0.44627300 | -3.10996200 |
| H | -6.68118800 | 2.86054000  | -3.24762800 | C | -1.84832300 | -2.82930100 | -0.15765700 |
| H | -5.77074100 | 4.17664700  | -1.35848400 | H | -3.00159200 | 3.22007600  | 2.39017900  |
| H | -4.45500600 | 4.30552300  | 0.69619900  | H | -2.48667000 | 0.79382800  | 2.21406700  |
| C | -5.99620700 | -3.70579600 | 2.22385600  | C | 1.84863400  | -2.82937200 | 0.15771300  |
| C | -4.84034000 | -4.15734900 | 1.63780000  | C | 2.73029800  | -3.69386800 | -0.44329200 |
| C | -3.93805200 | -3.25171500 | 1.02965900  | C | 2.19201300  | -1.44239500 | 0.20782700  |
| H | -6.68462700 | -4.41050000 | 2.68643200  | C | 3.93847400  | -3.25167600 | -1.02944400 |
| H | -4.59611300 | -5.21937100 | 1.63210800  | H | 2.48574700  | -4.75700500 | -0.49035000 |



|   |            |             |             |    |             |             |             |
|---|------------|-------------|-------------|----|-------------|-------------|-------------|
| C | 3.33813700 | -0.95607000 | -0.40373700 | H  | 4.79606400  | -0.69002000 | 1.72503100  |
| C | 4.24383600 | -1.85951100 | -1.03248600 | H  | 3.00117400  | 3.21981300  | -2.39060500 |
| C | 4.84087200 | -4.15727300 | -1.63748100 | H  | 4.45426000  | 4.30571300  | -0.69664700 |
| C | 3.62303000 | 0.50496700  | -0.42578600 | C  | 6.06099400  | 2.38112100  | 2.49265900  |
| P | 1.54216700 | -0.44600500 | 3.10985800  | H  | 5.76974000  | 4.17734300  | 1.35823600  |
| C | 5.44447000 | -1.42318500 | -1.64865500 | H  | 6.18886500  | 0.42634700  | 3.42173900  |
| C | 5.99673900 | -3.70566700 | -2.22349100 | H  | 6.68027700  | 2.86162200  | 3.24760600  |
| H | 4.59673200 | -5.21931500 | -1.63174300 | C  | 0.50138300  | -3.32183000 | 0.59492400  |
| C | 4.45520600 | 1.10890900  | 0.56301500  | H  | 0.57974700  | -4.33737100 | 1.00448100  |
| C | 3.11774100 | 1.26936000  | -1.46084900 | H  | 0.10517100  | -2.69947200 | 1.40892900  |
| C | 6.30031000 | -2.32609100 | -2.22912100 | P  | 1.19764500  | -0.21695100 | 1.12687400  |
| H | 5.68249000 | -0.36070100 | -1.65442800 | P  | -1.19750900 | -0.21692100 | -1.12702900 |
| H | 6.68524100 | -4.41035000 | -2.68597800 | Pd | 0.00005600  | 1.36954700  | -0.00005400 |
| C | 4.74471700 | 2.50220600  | 0.45804600  | Cl | -0.79651200 | 3.02518500  | -1.53311400 |
| C | 4.99985000 | 0.37818800  | 1.64786100  | Cl | 0.79616300  | 3.02507700  | 1.53334800  |
| C | 3.41575700 | 2.64347700  | -1.56576000 | C  | -0.50108900 | -3.32172800 | -0.59496500 |
| H | 2.48656900 | 0.79351500  | -2.21418300 | H  | -0.10486800 | -2.69927000 | -1.40889100 |
| H | 7.21981200 | -1.97862700 | -2.69597400 | H  | -0.57949400 | -4.33721400 | -1.00465100 |
| C | 4.21708700 | 3.24423700  | -0.62702400 | H  | 0.66501500  | 0.63148900  | 3.42896100  |
| C | 5.55637000 | 3.11208100  | 1.44617500  | H  | -0.66505300 | 0.63128300  | -3.42923800 |
| C | 5.78006200 | 1.00068300  | 2.59250400  |    |             |             |             |

### 8E-Me

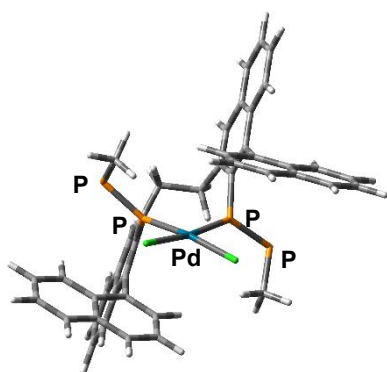

|   |             |             |             |   |             |             |             |
|---|-------------|-------------|-------------|---|-------------|-------------|-------------|
| C | -6.38758200 | -2.36424500 | 2.14302100  | H | -2.56512000 | -4.81865100 | 0.45879500  |
| C | -5.44715700 | 1.25755800  | -2.66499800 | C | -4.81242900 | 0.53080100  | -1.68746400 |
| C | -4.29643000 | -1.90852500 | 1.00232100  | H | -4.68199400 | -0.54557500 | -1.80335000 |
| C | -4.31879700 | 1.16450700  | -0.51965300 | C | -5.50467300 | -1.46478200 | 1.59829100  |
| C | -3.61178600 | 0.45674500  | 0.49459300  | H | -5.72806000 | -0.39930000 | 1.61427500  |
| C | -3.36581900 | -1.00840300 | 0.40543700  | H | -5.81488600 | 0.75866100  | -3.55989800 |
| C | -3.39209700 | 2.50673800  | 1.78441300  | H | -7.31377000 | -2.01076200 | 2.59191600  |
| C | -4.05089700 | 3.21304100  | 0.80888900  | C | -2.22139400 | -1.49911100 | -0.20947200 |
| C | -4.52431500 | 2.56773800  | -0.35839200 | C | -3.17076900 | 1.12419700  | 1.62088600  |
| C | -5.18937100 | 3.28613500  | -1.38244300 | P | -1.40412000 | -0.72513200 | -3.09803400 |
| C | -5.63356000 | 2.65035200  | -2.51448500 | C | -1.89645700 | -2.89436700 | -0.16516700 |
| H | -6.13709600 | 3.21386400  | -3.29778000 | H | -3.02823500 | 3.00629400  | 2.68071800  |
| H | -5.33536600 | 4.35870500  | -1.25369500 | H | -2.64344800 | 0.56351300  | 2.39485300  |
| H | -4.22034200 | 4.28436000  | 0.91748600  | C | 1.79808400  | -2.84018900 | 0.18913100  |
| C | -6.10328000 | -3.74762200 | 2.12269100  | C | 2.68156700  | -3.72249800 | -0.38485800 |
| C | -4.94101900 | -4.20650400 | 1.55465400  | C | 2.15413700  | -1.45402400 | 0.22215400  |
| C | -4.01355900 | -3.30463900 | 0.98047000  | C | 3.90319900  | -3.30457000 | -0.95933100 |
| H | -6.81166000 | -4.44971800 | 2.55850900  | H | 2.42820500  | -4.78435700 | -0.41503100 |
| H | -4.71201600 | -5.27182800 | 1.53678900  | C | 3.31919100  | -0.99477300 | -0.37658900 |
| C | -2.79874100 | -3.75303300 | 0.41352500  | C | 4.22411600  | -1.91636300 | -0.97815600 |

|   |            |             |             |    |             |             |             |
|---|------------|-------------|-------------|----|-------------|-------------|-------------|
| C | 4.80674000 | -4.22973800 | -1.53584000 | H  | 5.73599600  | 4.14796900  | 1.37534400  |
| C | 3.61784600 | 0.46222500  | -0.41157000 | H  | 6.19126700  | 0.39665300  | 3.43105000  |
| P | 1.42325600 | -0.51850900 | 3.08866800  | H  | 6.67080000  | 2.83407700  | 3.25378200  |
| C | 5.43989100 | -1.50279100 | -1.58058400 | C  | 0.45109600  | -3.33662400 | 0.62908200  |
| C | 5.97812200 | -3.80017900 | -2.10725200 | H  | 0.54818800  | -4.33295500 | 1.08022400  |
| H | 4.55118200 | -5.28900700 | -1.51719300 | H  | 0.03529200  | -2.69190300 | 1.41328500  |
| C | 4.44727200 | 1.06998600  | 0.57619300  | P  | 1.14960500  | -0.20348500 | 1.10252400  |
| C | 3.10318000 | 1.22313700  | -1.44235400 | P  | -1.19774800 | -0.29075300 | -1.12535000 |
| C | 6.29647400 | -2.42385700 | -2.13029800 | Pd | -0.04365400 | 1.37615600  | -0.05850300 |
| H | 5.68828000 | -0.44277300 | -1.59901200 | Cl | -1.06410800 | 2.99617300  | -1.50513400 |
| H | 6.66766900 | -4.51950900 | -2.54515000 | Cl | 0.93034100  | 3.12043500  | 1.26003600  |
| C | 4.72014700 | 2.46692900  | 0.47542400  | C  | -0.54488300 | -3.41135600 | -0.56482800 |
| C | 4.99684000 | 0.34225800  | 1.66058000  | H  | -0.14188400 | -2.84641500 | -1.41382300 |
| C | 3.37407600 | 2.60313700  | -1.53652200 | H  | -0.62724000 | -4.45184700 | -0.90475100 |
| H | 2.47866800 | 0.73895200  | -2.19493000 | C  | 0.27506800  | 0.71913800  | 3.84950900  |
| H | 7.22786100 | -2.09381800 | -2.58622700 | H  | -0.17543000 | 1.40298100  | 3.12143100  |
| C | 4.16820900 | 3.20958500  | -0.59680500 | H  | -0.51003100 | 0.16937500  | 4.38407400  |
| C | 5.53278700 | 3.08036800  | 1.46051700  | H  | 0.83896000  | 1.30433900  | 4.58560000  |
| C | 5.77740200 | 0.96834300  | 2.60239600  | C  | -0.22885200 | 0.46169200  | -3.89677100 |
| H | 4.79055500 | -0.72521300 | 1.74182500  | H  | 0.02790100  | 1.31478100  | -3.25699200 |
| H | 2.94368900 | 3.17907700  | -2.35420600 | H  | 0.68010600  | -0.08691600 | -4.17558700 |
| H | 4.38343300 | 4.27645900  | -0.65658100 | H  | -0.69510000 | 0.83157500  | -4.81729700 |
| C | 6.05023500 | 2.35051800  | 2.50169800  |    |             |             |             |

### 8E-Ph

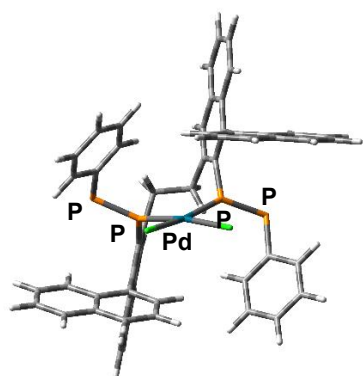

|   |             |             |             |   |             |             |             |
|---|-------------|-------------|-------------|---|-------------|-------------|-------------|
| C | -6.29473800 | 2.42593100  | 2.70076900  | C | -3.89633000 | 1.21124300  | 3.50882800  |
| C | -6.10283100 | -2.53749100 | -0.44454300 | H | -6.52157300 | 2.97559400  | 4.78590900  |
| C | -4.29847200 | 1.16874800  | 2.14164000  | H | -4.40586200 | 1.90232900  | 5.49183400  |
| C | -4.72945000 | -0.55812200 | -0.73877500 | C | -2.68087000 | 0.59983800  | 3.89294800  |
| C | -3.85080000 | 0.44668400  | -0.23647200 | H | -2.37985500 | 0.65139100  | 4.94148400  |
| C | -3.46615800 | 0.49561000  | 1.20161600  | C | -5.28224500 | -1.57006700 | 0.08499800  |
| C | -3.67367100 | 1.41150200  | -2.46446200 | H | -5.04866400 | -1.57644900 | 1.14985600  |
| C | -4.50887000 | 0.44950100  | -2.97118600 | C | -5.51623800 | 1.79101600  | 1.76562100  |
| C | -5.05166700 | -0.55312700 | -2.12969400 | H | -5.82521500 | 1.76053300  | 0.72192400  |
| C | -5.90398600 | -1.56182300 | -2.64185900 | H | -6.51698400 | -3.30895600 | 0.20210900  |
| C | -6.41703700 | -2.53537400 | -1.82078900 | H | -7.22663700 | 2.90036600  | 2.39946800  |
| H | -7.06916800 | -3.30639700 | -2.22677900 | C | -2.28858500 | -0.10396300 | 1.62584300  |
| H | -6.14204300 | -1.54972400 | -3.70551800 | C | -3.35034400 | 1.40507200  | -1.09361000 |
| H | -4.76452300 | 0.43516500  | -4.03064100 | P | -1.91506900 | -2.98635600 | 0.68254400  |
| C | -5.89435000 | 2.46848400  | 4.05517100  | C | -0.82146100 | -3.88245300 | -0.46815700 |
| C | -4.72205100 | 1.87404300  | 4.44931000  | C | -1.41326900 | -4.70344500 | -1.43580800 |

|   |             |             |             |    |             |             |             |
|---|-------------|-------------|-------------|----|-------------|-------------|-------------|
| C | 0.57450500  | -3.81659900 | -0.37861100 | H  | 7.24599000  | -2.88828600 | 2.37661000  |
| C | -0.62030000 | -5.40679700 | -2.33454700 | C  | 4.43885600  | -0.47604700 | -2.98792100 |
| C | 1.36410100  | -4.53208100 | -1.27345500 | C  | 5.85269200  | 1.52603100  | -2.68264400 |
| C | 0.76804000  | -5.31542000 | -2.25907500 | C  | 6.09088800  | 2.50374100  | -0.48993500 |
| H | -1.08614400 | -6.02825800 | -3.09676000 | H  | 5.05701000  | 1.54955600  | 1.12208200  |
| H | 2.45014200  | -4.48293600 | -1.19950700 | H  | 3.15932100  | -2.19350300 | -3.10604200 |
| C | -1.86957000 | -0.04708800 | 2.99214800  | C  | 0.69225200  | 5.50304800  | -2.23481300 |
| H | -3.24437100 | 2.17536200  | -3.11178700 | C  | -1.31009200 | 4.50018000  | -1.33152400 |
| H | -2.68165700 | 2.16607500  | -0.69494900 | H  | 4.67638600  | -0.46325000 | -4.05162400 |
| C | 1.87496100  | 0.02772200  | 3.00119600  | C  | 6.38341300  | 2.49810800  | -1.87103900 |
| C | 2.69621400  | -0.61220000 | 3.89778000  | H  | 6.07339800  | 1.51202300  | -3.75003400 |
| C | 2.28538800  | 0.08525700  | 1.63246300  | H  | 6.51828500  | 3.27466500  | 0.14865300  |
| C | 3.91338200  | -1.21659200 | 3.50651000  | C  | -0.69361300 | 5.35890500  | -2.23913400 |
| H | 2.40283700  | -0.66300500 | 4.94848000  | H  | -2.39591600 | 4.40879800  | -1.32007500 |
| C | 3.46052200  | -0.51309200 | 1.20020400  | H  | 7.03262600  | 3.26547200  | -2.28847300 |
| C | 4.30333200  | -1.17905400 | 2.13569400  | C  | 0.53835600  | 0.54610300  | 3.44765000  |
| C | 4.75279300  | -1.86735200 | 4.44313100  | H  | 0.61283200  | 0.96765200  | 4.45915700  |
| C | 3.82805800  | -0.46891300 | -0.24240600 | H  | 0.20495300  | 1.37143000  | 2.80363200  |
| P | 1.92651300  | 2.97182300  | 0.70866800  | P  | 1.35358200  | 1.04322600  | 0.38298000  |
| C | 5.52129000  | -1.79586300 | 1.75164600  | P  | -1.35284900 | -1.05220400 | 0.37104500  |
| C | 5.92622200  | -2.45493600 | 4.04175400  | Pd | -0.00669000 | 0.01371300  | -1.16639100 |
| H | 4.44680900  | -1.89156200 | 5.48881000  | Cl | -1.10668600 | -1.24395400 | -2.87283900 |
| C | 4.70484800  | 0.52974900  | -0.75961000 | Cl | 1.08680000  | 1.31641000  | -2.84232800 |
| C | 3.30598500  | -1.42395200 | -1.09060600 | C  | -0.53438000 | -0.57317600 | 3.43464900  |
| C | 0.85384600  | 3.88499300  | -0.44486500 | H  | -0.19905600 | -1.38752100 | 2.77779800  |
| C | 6.31345100  | -2.41867100 | 2.68343300  | H  | -0.61312900 | -1.01322400 | 4.43797100  |
| H | 5.81981100  | -1.76922000 | 0.70473700  | H  | -1.29750600 | 5.93068800  | -2.94106800 |
| H | 6.56445100  | -2.95174800 | 4.77003300  | H  | 1.17243600  | 6.18238900  | -2.93633300 |
| C | 5.00363200  | 0.52232700  | -2.15578500 | H  | 2.54856200  | 4.89112900  | -1.33374400 |
| C | 5.27477900  | 1.54037000  | 0.05386000  | H  | -1.01989000 | 3.09810300  | 0.28441200  |
| C | 3.60528500  | -1.43200500 | -2.46702900 | H  | 1.03971700  | -3.21167100 | 0.40268000  |
| H | 2.63683400  | -2.17936300 | -0.68167700 | H  | 1.38855900  | -5.87095300 | -2.95956800 |
| C | 1.46377000  | 4.77994100  | -1.33292900 | H  | -2.49962800 | -4.77244500 | -1.49996900 |
| C | -0.54114700 | 3.76486400  | -0.43588700 |    |             |             |             |

### 8E-Mes

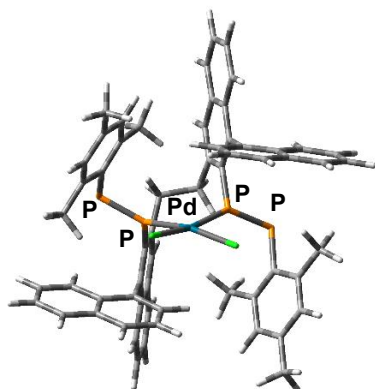

|   |             |             |             |   |             |             |             |
|---|-------------|-------------|-------------|---|-------------|-------------|-------------|
| C | -6.38206700 | 1.95073900  | 2.32914500  | C | -3.37247400 | 0.04840600  | 1.19292800  |
| C | -5.30218600 | -3.55367900 | -0.20306000 | C | -3.69932900 | 0.63845800  | -2.53314100 |
| C | -4.29825100 | 0.75181700  | 2.01427700  | C | -4.30871300 | -0.51312400 | -2.96308900 |
| C | -4.34955000 | -1.36924100 | -0.66223300 | C | -4.64536100 | -1.54041100 | -2.04773400 |
| C | -3.69445600 | -0.17328000 | -0.24278800 | C | -5.26414200 | -2.74138600 | -2.47520300 |

|   |             |             |             |    |             |             |             |
|---|-------------|-------------|-------------|----|-------------|-------------|-------------|
| C | -5.58128200 | -3.72990000 | -1.57653200 | C  | 4.70754900  | 2.39213100  | 0.24786600  |
| H | -6.05207600 | -4.64980600 | -1.91843300 | C  | 3.69639100  | -0.64696500 | -2.52588200 |
| H | -5.48056200 | -2.86488300 | -3.53651100 | H  | 2.90932600  | -1.73503100 | -0.82702500 |
| H | -4.53989400 | -0.65901200 | -4.01838200 | C  | 0.50990000  | 4.70078100  | -1.27457900 |
| C | -6.04502600 | 2.19200400  | 3.68004600  | C  | -1.38307100 | 3.99251300  | 0.10745700  |
| C | -4.86525900 | 1.71536500  | 4.19445600  | H  | 7.31455300  | -2.33629600 | 1.94553500  |
| C | -3.96569800 | 0.98541000  | 3.37989600  | C  | 4.30890200  | 0.50259100  | -2.95690400 |
| H | -6.72682700 | 2.75756900  | 4.31240600  | C  | 5.26894300  | 2.72944400  | -2.47116200 |
| H | -4.59876500 | 1.89478800  | 5.23585800  | C  | 5.30753900  | 3.54456000  | -0.19998300 |
| C | -2.73882800 | 0.49763100  | 3.88297700  | H  | 4.49850000  | 2.26147100  | 1.30991400  |
| H | -2.49599500 | 0.68524900  | 4.93123400  | H  | 3.43056900  | -1.43406000 | -3.23027600 |
| C | -4.70542600 | -2.39915600 | 0.24372700  | C  | -0.39011400 | 5.30672200  | -2.15061000 |
| H | -4.49749200 | -2.26673300 | 1.30576800  | C  | 1.97729800  | 4.74743200  | -1.57618000 |
| C | -5.53153800 | 1.24480600  | 1.51552000  | C  | -2.24172200 | 4.60138900  | -0.80503200 |
| H | -5.79490100 | 1.06039700  | 0.47539100  | C  | -1.95497900 | 3.34595100  | 1.33532400  |
| H | -5.56555500 | -4.33713900 | 0.50545500  | H  | 4.54164900  | 0.64642900  | -4.01213600 |
| H | -7.32345500 | 2.32765800  | 1.93396000  | C  | 5.58785400  | 3.71833600  | -1.57351900 |
| C | -2.17634300 | -0.41464600 | 1.72779800  | H  | 5.48640400  | 2.85111200  | -3.53246700 |
| C | -3.39590700 | 0.80828200  | -1.16746300 | H  | 5.57243900  | 4.32828200  | 0.50767300  |
| P | -1.19592300 | -3.26560600 | 1.00904600  | C  | -1.76607100 | 5.25493300  | -1.94409400 |
| C | 0.00110100  | -4.01656500 | -0.15412400 | H  | -0.00140300 | 5.82552500  | -3.02892600 |
| C | -0.50059700 | -4.69582600 | -1.28078200 | H  | -3.31719300 | 4.57706300  | -0.61413900 |
| C | 1.38641000  | -3.98813500 | 0.10913500  | H  | 6.06113100  | 4.63664900  | -1.91627200 |
| C | 0.40277500  | -5.29744000 | -2.15558800 | C  | -2.71793500 | 5.91493400  | -2.89466900 |
| C | 2.24929800  | -4.59202000 | -0.80350900 | C  | 0.50796700  | 0.58478200  | 3.69234600  |
| C | 1.77897700  | -5.23677800 | -1.94912600 | H  | 0.66233000  | 0.92508300  | 4.72457900  |
| H | 0.01724300  | -5.82089200 | -3.03261400 | H  | 0.08573500  | 1.44391700  | 3.15646200  |
| H | 3.32348000  | -4.57142500 | -0.60567300 | P  | 1.05648300  | 1.28170700  | 0.56719600  |
| C | 1.95339300  | -3.35137700 | 1.34446000  | P  | -1.05920100 | -1.28325000 | 0.56474300  |
| C | -1.96770400 | -4.74995200 | -1.58272900 | Pd | -0.00043500 | 0.00019200  | -1.03365600 |
| C | -1.84088200 | -0.18990900 | 3.10001200  | Cl | -0.67646500 | -1.53720800 | -2.73245900 |
| H | -3.43455900 | 1.42428600  | -3.23920200 | Cl | 0.67880200  | 1.53990500  | -2.72911400 |
| C | 2.73451600  | -5.84847900 | -2.92777400 | C  | -0.51663700 | -0.58692400 | 3.69118700  |
| H | -2.91690900 | 1.73171300  | -0.83518200 | H  | -0.09315500 | -1.44589800 | 3.15601200  |
| C | 1.83322500  | 0.18756100  | 3.10363300  | H  | -0.67300000 | -0.92744800 | 4.72304800  |
| C | 2.72948600  | -0.50053100 | 3.88803200  | H  | -3.03620600 | 3.52337000  | 1.40635300  |
| C | 2.17101400  | 0.41206400  | 1.73195600  | H  | -1.49188100 | 3.72986900  | 2.25688900  |
| C | 3.95673200  | -0.98927900 | 3.38682900  | H  | -1.80373500 | 2.25634500  | 1.33837200  |
| H | 2.48479100  | -0.68821100 | 4.93584200  | H  | 2.19404600  | 5.48303300  | -2.35998200 |
| C | 3.36771800  | -0.05167800 | 1.19899400  | H  | 2.58117600  | 5.01069300  | -0.69521200 |
| C | 4.29166700  | -0.75585000 | 2.02176200  | H  | 2.33279100  | 3.76710900  | -1.92957800 |
| C | 4.85395800  | -1.72079200 | 4.20256100  | H  | -2.22504700 | 6.18194000  | -3.83668000 |
| C | 3.69140000  | 0.16830900  | -0.23660200 | H  | -3.13221800 | 6.83751500  | -2.46442300 |
| P | 1.19655200  | 3.26358100  | 1.01236100  | H  | -3.56921100 | 5.26190600  | -3.12636900 |
| C | 5.52499000  | -1.25049000 | 1.52475600  | H  | 1.80564800  | -2.26134700 | 1.35326400  |
| C | 6.03371400  | -2.19919900 | 3.68977400  | H  | 1.48428100  | -3.73944300 | 2.26119500  |
| H | 4.58556400  | -1.90016500 | 5.24348100  | H  | 3.03376900  | -3.53216600 | 1.41996400  |
| C | 4.34980900  | 1.36198700  | -0.65706000 | H  | 3.59182100  | -6.30898800 | -2.42094700 |
| C | 3.39114100  | -0.81357000 | -1.16025800 | H  | 3.13710700  | -5.08780900 | -3.61167600 |
| C | 0.00377900  | 4.02080500  | -0.15086900 | H  | 2.24585200  | -6.61345500 | -3.54278100 |
| C | 6.37317700  | -1.95802200 | 2.33945600  | H  | -2.57119800 | -5.01553100 | -0.70217200 |
| H | 5.79020100  | -1.06625400 | 0.48506800  | H  | -2.32738700 | -3.77134500 | -1.93664900 |
| H | 6.71361700  | -2.76614900 | 4.32293900  | H  | -2.18051000 | -5.48658900 | -2.36665100 |
| C | 4.64704200  | 1.53045500  | -2.04262600 |    |             |             |             |

## 10A-H

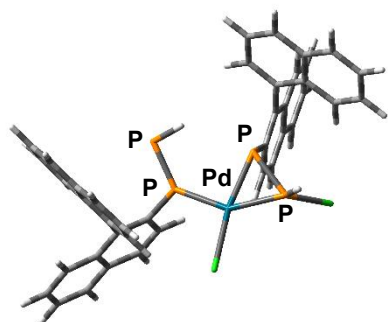

|   |             |             |             |    |             |             |             |
|---|-------------|-------------|-------------|----|-------------|-------------|-------------|
| C | 5.70098600  | 2.43219500  | 3.50859900  | C  | -6.55710900 | 0.95215200  | 0.15846700  |
| C | 6.48753800  | -1.18696600 | -1.56929400 | C  | -7.36883700 | 3.19241800  | 0.56799600  |
| C | 4.10915600  | 1.59133700  | 1.88143400  | H  | -5.88892200 | 4.71060200  | 0.89318400  |
| C | 5.03996400  | -1.39091600 | 0.36885200  | C  | -7.60608000 | 1.82713700  | 0.29656900  |
| C | 4.07517500  | -0.85754600 | 1.27514900  | H  | -6.74517500 | -0.09892100 | -0.05516200 |
| C | 3.55485200  | 0.52706200  | 1.10764100  | H  | -8.20923000 | 3.87557500  | 0.67497700  |
| C | 4.01980800  | -2.97539500 | 2.46514800  | H  | -8.62821300 | 1.46758100  | 0.19410900  |
| C | 4.92854400  | -3.51741100 | 1.59131400  | C  | -4.29321400 | -0.92062900 | -0.18542900 |
| C | 5.45800400  | -2.74625800 | 0.52788000  | C  | -4.67197400 | -1.87371500 | 0.80590700  |
| C | 6.39295400  | -3.28937800 | -0.38787700 | C  | -4.03378800 | -1.33653200 | -1.47636600 |
| C | 6.89294500  | -2.53212000 | -1.41745500 | C  | -4.79437300 | -3.24518700 | 0.42956100  |
| H | 7.60667500  | -2.96248700 | -2.11753100 | C  | -4.89179600 | -1.52015700 | 2.16120800  |
| H | 6.70502300  | -4.32580500 | -0.25828100 | C  | -4.14990400 | -2.69578300 | -1.84099700 |
| H | 5.25876800  | -4.55035900 | 1.70113400  | H  | -3.72558700 | -0.60010900 | -2.22101000 |
| C | 5.15941500  | 3.72981500  | 3.38072000  | C  | -5.16719700 | -4.19858300 | 1.40813800  |
| C | 4.11815600  | 3.95953700  | 2.51621500  | C  | -4.52774400 | -3.62791000 | -0.90936200 |
| C | 3.57295200  | 2.90570600  | 1.74469300  | C  | -5.24383700 | -2.47068000 | 3.08911100  |
| H | 5.57360400  | 4.54765100  | 3.96733400  | H  | -4.77397700 | -0.47984300 | 2.46378500  |
| H | 3.69518000  | 4.95796200  | 2.40541200  | H  | -3.94224200 | -2.99307600 | -2.86715200 |
| C | 2.50890400  | 3.12643100  | 0.83636500  | C  | -5.39158900 | -3.82219800 | 2.70922500  |
| H | 2.09956800  | 4.13199000  | 0.74005500  | H  | -5.26447200 | -5.24152900 | 1.10628900  |
| C | 5.58909400  | -0.62892400 | -0.69335900 | H  | -4.62393700 | -4.67947600 | -1.17985900 |
| H | 5.29259500  | 0.41387800  | -0.80528700 | H  | -5.40981200 | -2.18125400 | 4.12518200  |
| C | 5.18833100  | 1.38801400  | 2.77861000  | H  | -5.67556600 | -4.56441900 | 3.45289400  |
| H | 5.60927800  | 0.38909600  | 2.88097300  | P  | -1.38689200 | -0.07780400 | 0.07474500  |
| H | 6.89300300  | -0.58787000 | -2.38298100 | P  | -1.13944500 | -1.10383500 | 1.81440600  |
| H | 6.53067800  | 2.26016300  | 4.19160800  | P  | 1.88076000  | -0.66859700 | -0.72214400 |
| C | 2.52740100  | 0.78432800  | 0.20969800  | Pd | -0.07828800 | 0.16955700  | -1.81840100 |
| C | 3.59349000  | -1.64033200 | 2.30320500  | Cl | -1.76772300 | 1.03813700  | -3.32231200 |
| H | 3.61777700  | -3.57178900 | 3.28173100  | P  | 2.04730500  | 0.00031100  | -2.77530700 |
| H | 2.85940200  | -1.21853500 | 2.99096700  | Cl | 3.43788800  | 1.45222300  | -3.21942300 |
| C | -3.64719400 | 3.25333800  | 0.65783100  | C  | -2.58845600 | 2.39709900  | 0.51610500  |
| C | -2.82311400 | 1.01790100  | 0.28219000  | H  | -1.56477200 | 2.76646500  | 0.58903600  |
| C | -4.97959000 | 2.78126000  | 0.55346300  | C  | 2.00222300  | 2.10015200  | 0.08602000  |
| H | -3.47952400 | 4.31281600  | 0.84994000  | H  | 1.18256000  | 2.29143700  | -0.60822000 |
| C | -4.10611900 | 0.51557900  | 0.15244600  | H  | 0.03146900  | -1.75981300 | 1.32083200  |
| C | -5.21800800 | 1.39939300  | 0.28967700  | H  | 2.49772100  | -1.06703000 | -3.57290700 |
| C | -6.08319700 | 3.65746900  | 0.69059600  |    |             |             |             |

## 10A-Me

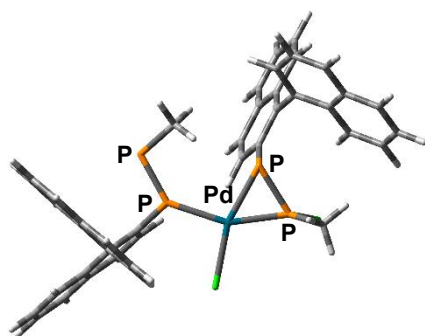

|   |             |             |             |    |             |             |             |
|---|-------------|-------------|-------------|----|-------------|-------------|-------------|
| C | 5.89372300  | 3.46662100  | 2.63701200  | C  | -7.80894400 | 1.60215000  | -0.95007500 |
| C | 6.27654900  | -1.07072700 | -1.82221500 | H  | -6.92097100 | -0.25323700 | -0.36250500 |
| C | 4.21622000  | 2.12682000  | 1.50435600  | H  | -8.44330600 | 3.58843000  | -1.54558300 |
| C | 5.27719500  | -1.00595400 | 0.39026600  | H  | -8.81772000 | 1.19409300  | -0.97359900 |
| C | 4.44658200  | -0.38729600 | 1.37335100  | C  | -4.47838400 | -0.95181000 | 0.09331900  |
| C | 3.71125200  | 0.86834600  | 1.05932100  | C  | -4.92108000 | -1.39238900 | 1.37547500  |
| C | 4.89828500  | -2.21943500 | 2.90424100  | C  | -4.15712300 | -1.87825600 | -0.87819800 |
| C | 5.66605200  | -2.85278600 | 1.96002300  | C  | -5.02940100 | -2.79399000 | 1.62170800  |
| C | 5.87361900  | -2.26827200 | 0.68654700  | C  | -5.23142800 | -0.49224700 | 2.42596200  |
| C | 6.65676200  | -2.90915900 | -0.30583700 | C  | -4.26559000 | -3.26392500 | -0.62936100 |
| C | 6.84822100  | -2.33130700 | -1.53614800 | H  | -3.80033300 | -1.52501000 | -1.84723300 |
| H | 7.44685500  | -2.83684300 | -2.29153300 | C  | -5.46194900 | -3.23836500 | 2.89486800  |
| H | 7.10330900  | -3.87558900 | -0.07129200 | C  | -4.69566100 | -3.71107400 | 0.59368400  |
| H | 6.13009000  | -3.81559900 | 2.17441300  | C  | -5.64173200 | -0.95543700 | 3.65324200  |
| C | 5.16043700  | 4.64007800  | 2.35455700  | H  | -5.14017400 | 0.57918200  | 2.24889000  |
| C | 3.98228800  | 4.56365000  | 1.65461400  | H  | -4.00892700 | -3.97066400 | -1.41627000 |
| C | 3.48514600  | 3.31570900  | 1.20824300  | C  | -5.76374100 | -2.34183800 | 3.88999000  |
| H | 5.53525200  | 5.60458600  | 2.69208700  | H  | -5.54579600 | -4.31126200 | 3.06936100  |
| H | 3.41096900  | 5.46302900  | 1.42487700  | H  | -4.78547600 | -4.77826000 | 0.79741800  |
| C | 2.28317100  | 3.22208100  | 0.46604300  | H  | -5.87532800 | -0.24970700 | 4.44836000  |
| H | 1.73342800  | 4.13525900  | 0.23789000  | H  | -6.09450100 | -2.69679500 | 4.86439200  |
| C | 5.51575900  | -0.42266400 | -0.87967200 | P  | -1.60055400 | 0.03920300  | 0.28343700  |
| H | 5.08650800  | 0.55448200  | -1.10137400 | P  | -1.53927500 | 0.23378200  | 2.31094000  |
| C | 5.43410000  | 2.24061300  | 2.22297600  | P  | 1.94113800  | -0.86220000 | -0.16689800 |
| H | 6.00396500  | 1.33955100  | 2.44376200  | Pd | -0.08239900 | -0.51898400 | -1.43551300 |
| H | 6.44132500  | -0.60865500 | -2.79488600 | Cl | -1.65554400 | -0.36822800 | -3.28073100 |
| H | 6.83099800  | 3.53652000  | 3.18598200  | P  | 2.02848400  | -0.79426200 | -2.31092200 |
| C | 2.53251800  | 0.81578600  | 0.32471600  | Cl | 3.01447400  | 0.76714800  | -3.22096900 |
| C | 4.28438100  | -0.98447800 | 2.60554500  | C  | -2.84019100 | 2.41488200  | -0.53058000 |
| H | 4.74711700  | -2.67069700 | 3.88299200  | H  | -1.83081900 | 2.82743700  | -0.51431300 |
| H | 3.65395400  | -0.49884900 | 3.35125600  | C  | 1.82050700  | 2.00880500  | 0.03150200  |
| C | -3.90271100 | 3.20361500  | -0.88133400 | H  | 0.90048900  | 1.94884000  | -0.55062600 |
| C | -3.04718700 | 1.05609800  | -0.17908300 | C  | 0.00544700  | -0.70331700 | 2.74523900  |
| C | -5.21786300 | 2.67697500  | -0.90316800 | H  | 0.26170300  | -1.48277200 | 2.01824600  |
| H | -3.75164500 | 4.25050500  | -1.14399700 | H  | 0.84211900  | 0.00560400  | 2.82075500  |
| C | -4.31143900 | 0.49519500  | -0.21016800 | H  | -0.13358700 | -1.16690600 | 3.72834700  |
| C | -5.43045000 | 1.30581300  | -0.56883700 | C  | 2.74502700  | -2.28652200 | -3.06907000 |
| C | -6.32776600 | 3.48235400  | -1.25466400 | H  | 2.28531400  | -3.14967700 | -2.57248900 |
| C | -6.75245100 | 0.79430700  | -0.60821300 | H  | 2.50941800  | -2.31245100 | -4.13770600 |
| C | -7.59671100 | 2.95998700  | -1.27542900 | H  | 3.83042800  | -2.30041000 | -2.91223200 |
| H | -6.15164000 | 4.52785500  | -1.50775400 |    |             |             |             |

## 10A-Ph

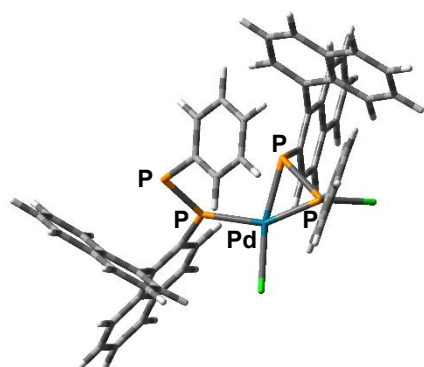

|   |             |             |             |    |             |             |             |
|---|-------------|-------------|-------------|----|-------------|-------------|-------------|
| C | 5.27430100  | 5.10205200  | 1.80466800  | C  | -4.53592600 | 0.87466300  | -0.19968700 |
| C | 6.34798000  | -0.56099800 | -0.69929600 | C  | -5.55160900 | 1.80257600  | -0.57955400 |
| C | 3.76448200  | 3.41659200  | 0.92773500  | C  | -6.21578000 | 4.07699500  | -1.21162000 |
| C | 4.90808400  | 0.13365000  | 1.12884100  | C  | -6.90591200 | 1.40914500  | -0.73440600 |
| C | 3.93066500  | 1.00961900  | 1.69156400  | C  | -7.51802600 | 3.66563500  | -1.34918000 |
| C | 3.29986000  | 2.07023000  | 0.85679700  | H  | -5.93695500 | 5.11363000  | -1.39992000 |
| C | 4.01318200  | -0.24396100 | 3.77104900  | C  | -7.86427900 | 2.31770800  | -1.10908800 |
| C | 4.90279400  | -1.13710000 | 3.22871700  | H  | -7.17639600 | 0.37010400  | -0.55350700 |
| C | 5.37094700  | -0.97348000 | 1.90175200  | H  | -8.28720600 | 4.37576500  | -1.64678400 |
| C | 6.30351100  | -1.87264200 | 1.32627900  | H  | -8.89843500 | 1.99847300  | -1.22341800 |
| C | 6.78219100  | -1.67488200 | 0.05442300  | C  | -4.86885400 | -0.55746900 | 0.02428800  |
| H | 7.50137800  | -2.37084300 | -0.37384400 | C  | -5.39091700 | -0.99090400 | 1.27783800  |
| H | 6.64225700  | -2.72090400 | 1.92149400  | C  | -4.59055300 | -1.47872600 | -0.96302600 |
| H | 5.26843300  | -1.98234200 | 3.81236000  | C  | -5.57930200 | -2.38815900 | 1.49830100  |
| C | 4.63623600  | 6.09136000  | 1.02444400  | C  | -5.67994500 | -0.09060300 | 2.33531400  |
| C | 3.58807900  | 5.75272500  | 0.20516400  | C  | -4.79568300 | -2.85891100 | -0.74603500 |
| C | 3.13001300  | 4.41541900  | 0.13055700  | H  | -4.16671600 | -1.13622500 | -1.90917200 |
| H | 4.98189200  | 7.12229500  | 1.07215300  | C  | -6.05108600 | -2.82880400 | 2.75941900  |
| H | 3.09193000  | 6.50754500  | -0.40484300 | C  | -5.27087300 | -3.30383600 | 0.46144700  |
| C | 2.05896300  | 4.04444900  | -0.71901200 | C  | -6.13275800 | -0.54942800 | 3.54765500  |
| H | 1.57742200  | 4.81383000  | -1.32265200 | H  | -5.52763900 | 0.97674800  | 2.17666800  |
| C | 5.43082800  | 0.31827500  | -0.17617600 | H  | -4.56487500 | -3.56568500 | -1.54104400 |
| H | 5.10413400  | 1.17798100  | -0.76068500 | C  | -6.32090300 | -1.93302000 | 3.76358400  |
| C | 4.84946600  | 3.79714700  | 1.75820800  | H  | -6.19008200 | -3.89860100 | 2.91697900  |
| H | 5.34461300  | 3.03666200  | 2.36020400  | H  | -5.42049200 | -4.36819500 | 0.64391100  |
| H | 6.73964600  | -0.40244600 | -1.70292100 | H  | -6.34597000 | 0.15547900  | 4.34920800  |
| H | 6.11043800  | 5.37782400  | 2.44465200  | H  | -6.67907000 | -2.28545900 | 4.72920100  |
| C | 2.25467200  | 1.73838800  | 0.00246300  | P  | -1.82437900 | 0.20136000  | 0.25447000  |
| C | 3.51827800  | 0.82473500  | 2.99397600  | P  | -2.05145500 | -0.76316000 | 2.04451900  |
| C | 2.42708800  | -2.34080300 | -2.14929600 | C  | -0.57932200 | -1.84554500 | 1.91874000  |
| C | 3.57569400  | -2.81848500 | -1.50788500 | C  | -0.34738300 | -2.70183100 | 0.83069100  |
| C | 1.56780400  | -3.21720100 | -2.81998100 | C  | 0.34563100  | -1.81748100 | 2.97165600  |
| C | 3.86233200  | -4.17668900 | -1.54141600 | C  | 0.81343000  | -3.46810200 | 0.77496200  |
| C | 1.86275100  | -4.57744900 | -2.84561400 | C  | 1.50707200  | -2.57819800 | 2.90681700  |
| C | 3.00553100  | -5.05382300 | -2.20732700 | C  | 1.75373400  | -3.38716100 | 1.79935200  |
| H | 4.75244100  | -4.55268400 | -1.03961700 | H  | 0.99017500  | -4.11966500 | -0.08093400 |
| H | 1.19753700  | -5.26575300 | -3.36261000 | H  | 2.23164800  | -2.52828300 | 3.71722900  |
| H | 3.66376400  | -0.36804700 | 4.79479200  | P  | 1.71678100  | -0.02613300 | 0.04114900  |
| H | 2.77652400  | 1.50387700  | 3.41564000  | Pd | -0.22403900 | -0.12934000 | -1.41099900 |
| C | -3.85242300 | 3.56880800  | -0.70452400 | Cl | -1.79510700 | -0.44406300 | -3.24355600 |
| C | -3.22403700 | 1.31434300  | -0.07826800 | P  | 1.95118400  | -0.60380700 | -2.02414500 |
| C | -5.20426200 | 3.16396000  | -0.82809300 | Cl | 3.28056100  | 0.46847200  | -3.20056900 |
| H | -3.59451300 | 4.60855600  | -0.90434700 | C  | -2.88507400 | 2.66782500  | -0.35227700 |

|   |             |             |             |
|---|-------------|-------------|-------------|
| H | -1.84438600 | 2.98491100  | -0.27547100 |
| C | 1.63312000  | 2.74436400  | -0.78462400 |
| H | 0.80475200  | 2.47323800  | -1.44148900 |
| H | 2.67523000  | -3.96575900 | 1.73922700  |
| H | -1.07799000 | -2.77257400 | 0.02264900  |

|   |            |             |             |
|---|------------|-------------|-------------|
| H | 0.16974500 | -1.17113900 | 3.83262800  |
| H | 0.66823100 | -2.83473200 | -3.30327300 |
| H | 3.23066700 | -6.11845600 | -2.22619900 |
| H | 4.23611300 | -2.12821000 | -0.98198900 |

### 10<sub>A</sub>-Mes

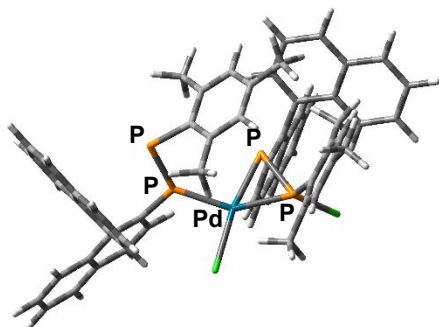

|   |            |             |             |
|---|------------|-------------|-------------|
| C | 4.56619700 | 5.84826800  | 1.22302500  |
| C | 6.82378200 | 1.08491100  | -0.70685500 |
| C | 3.26518300 | 3.91203000  | 0.54758600  |
| C | 5.09689400 | 1.19213000  | 0.99703900  |
| C | 3.82352900 | 1.63775500  | 1.46648500  |
| C | 2.97681200 | 2.51267800  | 0.60942700  |
| C | 4.18449400 | 0.44793700  | 3.55610400  |
| C | 5.40980100 | 0.00591700  | 3.12480000  |
| C | 5.89667900 | 0.36759600  | 1.84434200  |
| C | 7.16075200 | -0.07597000 | 1.38146300  |
| C | 7.61611300 | 0.27284600  | 0.13465700  |
| H | 8.58752700 | -0.07616000 | -0.21094500 |
| H | 7.76409800 | -0.70359800 | 2.03784100  |
| H | 6.03092300 | -0.62461900 | 3.76124300  |
| C | 3.78191700 | 6.67789700  | 0.39222800  |
| C | 2.75788100 | 6.13971900  | -0.34603400 |
| C | 2.47557300 | 4.75365000  | -0.28942100 |
| H | 3.99234200 | 7.74453700  | 0.34112000  |
| H | 2.14358800 | 6.76941800  | -0.98967500 |
| C | 1.42612600 | 4.18124900  | -1.04773000 |
| H | 0.82903400 | 4.82587000  | -1.69291100 |
| C | 5.59651200 | 1.53536700  | -0.28541600 |
| H | 4.98848200 | 2.15888000  | -0.94076300 |
| C | 4.31481400 | 4.50048000  | 1.29950900  |
| H | 4.92226500 | 3.86728400  | 1.94432500  |
| H | 7.18989100 | 1.35573400  | -1.69562800 |
| H | 5.37527300 | 6.28253400  | 1.80744700  |
| C | 1.93008200 | 1.98480700  | -0.13608500 |
| C | 3.39462300 | 1.27027700  | 2.72452100  |
| C | 2.32229500 | -2.34879300 | -1.86994100 |
| C | 3.39597800 | -2.79702100 | -1.06834500 |
| C | 1.58127500 | -3.25919700 | -2.66171600 |
| C | 3.67151600 | -4.16300400 | -1.03957100 |
| C | 1.88625200 | -4.61412200 | -2.57058500 |
| C | 2.91844500 | -5.08725000 | -1.75931700 |
| H | 4.50610600 | -4.51558700 | -0.43103300 |

|   |             |             |             |
|---|-------------|-------------|-------------|
| H | 1.31324800  | -5.32336800 | -3.17054500 |
| H | 3.81952300  | 0.17909300  | 4.54641900  |
| H | 2.42364500  | 1.62011000  | 3.07956500  |
| C | -3.98336600 | 3.68614600  | -0.72360600 |
| C | -3.40832800 | 1.41655500  | -0.09403800 |
| C | -5.34031600 | 3.30840700  | -0.86864400 |
| H | -3.70134500 | 4.72073100  | -0.91763400 |
| C | -4.72658200 | 1.00365000  | -0.23423700 |
| C | -5.71804300 | 1.95371200  | -0.62707900 |
| C | -6.32643900 | 4.24312100  | -1.26587000 |
| C | -7.07861200 | 1.59016200  | -0.80105200 |
| C | -7.63482100 | 3.85990000  | -1.42319900 |
| H | -6.02229700 | 5.27365100  | -1.44852500 |
| C | -8.01206700 | 2.51936400  | -1.18873300 |
| H | -7.37573100 | 0.55748600  | -0.62559300 |
| H | -8.38448900 | 4.58595900  | -1.73194100 |
| H | -9.05099100 | 2.22190700  | -1.31796900 |
| C | -5.10228000 | -0.41923400 | -0.01822600 |
| C | -5.64143600 | -0.84475300 | 1.23119000  |
| C | -4.87238100 | -1.33896700 | -1.01882600 |
| C | -5.88841400 | -2.23505600 | 1.43618700  |
| C | -5.89728100 | 0.05628100  | 2.29624200  |
| C | -5.14234400 | -2.71065300 | -0.81981700 |
| H | -4.44091100 | -1.00004100 | -1.96237000 |
| C | -6.37157100 | -2.66976000 | 2.69520400  |
| C | -5.63098600 | -3.14983800 | 0.38472200  |
| C | -6.36511300 | -0.39642100 | 3.50510100  |
| H | -5.70660300 | 1.11877500  | 2.14587900  |
| H | -4.94770000 | -3.41707400 | -1.62502500 |
| C | -6.60241800 | -1.77432200 | 3.70935900  |
| H | -6.55293500 | -3.73471600 | 2.84242500  |
| H | -5.82935200 | -4.20847300 | 0.55382500  |
| H | -6.55215400 | 0.30883100  | 4.31289300  |
| H | -6.96988600 | -2.12247800 | 4.67305300  |
| P | -2.00969200 | 0.31145100  | 0.27419900  |
| P | -2.30707800 | -0.76566700 | 1.98202000  |



|    |             |             |             |
|----|-------------|-------------|-------------|
| C  | -0.71539800 | -1.69740500 | 2.00125400  |
| C  | -0.47053900 | -2.78789900 | 1.14349200  |
| C  | 0.23538500  | -1.34302800 | 2.98313800  |
| C  | 0.72841500  | -3.49282900 | 1.27727800  |
| C  | 1.40681400  | -2.08552500 | 3.08972500  |
| C  | 1.67224400  | -3.16659500 | 2.24864600  |
| H  | 0.92193100  | -4.33447500 | 0.60763600  |
| H  | 2.14300300  | -1.81039900 | 3.84851800  |
| P  | 1.52482600  | 0.19350900  | 0.10934700  |
| Pd | -0.38028900 | -0.03140800 | -1.35529000 |
| Cl | -1.99964000 | -0.18482100 | -3.17857100 |
| P  | 1.81506700  | -0.61115800 | -1.87826600 |
| Cl | 3.15745200  | 0.42303000  | -3.09706200 |
| C  | -3.04033700 | 2.76496700  | -0.35883600 |
| H  | -1.99439200 | 3.06176300  | -0.26835400 |
| C  | 1.16057600  | 2.84081900  | -0.97280700 |
| H  | 0.34932800  | 2.41754400  | -1.56755600 |
| C  | -1.44633000 | -3.21767500 | 0.08542500  |
| H  | -2.48332900 | -3.23068300 | 0.45173500  |
| H  | -1.42742900 | -2.52889200 | -0.77550300 |
| H  | -1.19867200 | -4.21827100 | -0.29016200 |

|   |             |             |             |
|---|-------------|-------------|-------------|
| C | 0.03483100  | -0.15038000 | 3.87074500  |
| H | -0.92474500 | -0.18359900 | 4.40751100  |
| H | 0.83362300  | -0.07552600 | 4.61889600  |
| H | 0.03425000  | 0.78276900  | 3.28526300  |
| C | 2.92740600  | -3.96684400 | 2.41887300  |
| H | 2.94105600  | -4.47816600 | 3.39139700  |
| H | 3.02823500  | -4.72834600 | 1.63611200  |
| H | 3.82077200  | -3.32566800 | 2.38776700  |
| C | 4.25402100  | -1.87811500 | -0.25643500 |
| H | 4.59143200  | -1.00522400 | -0.83218400 |
| H | 3.71428900  | -1.49085100 | 0.62238900  |
| H | 5.14393100  | -2.40612300 | 0.10611700  |
| C | 0.50837300  | -2.82659800 | -3.61625500 |
| H | -0.39103200 | -2.45493000 | -3.10681100 |
| H | 0.84518500  | -2.01202100 | -4.27321600 |
| H | 0.20899000  | -3.66483500 | -4.25569900 |
| C | 3.22320300  | -6.55136700 | -1.69390600 |
| H | 2.32432800  | -7.13204700 | -1.44908100 |
| H | 3.58686100  | -6.92291500 | -2.66157900 |
| H | 3.98810400  | -6.77048000 | -0.94016800 |

### 10A-Mes\*

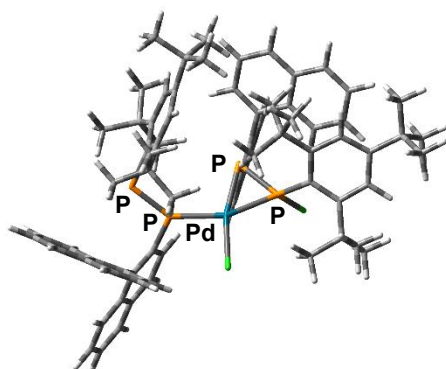

|   |             |             |            |
|---|-------------|-------------|------------|
| C | -2.56692000 | 0.39758500  | 6.98528600 |
| C | -5.67661900 | -0.44046200 | 1.47602500 |
| C | -1.78234000 | 0.04330100  | 4.71361600 |
| C | -3.99334900 | 1.13055200  | 2.24522500 |
| C | -2.72497500 | 1.41713000  | 2.83081600 |
| C | -1.82373200 | 0.33234600  | 3.31369600 |
| C | -3.13310300 | 3.79682400  | 2.53435200 |
| C | -4.34791600 | 3.54223600  | 1.94699800 |
| C | -4.80815800 | 2.21272600  | 1.79461200 |
| C | -6.05838300 | 1.92670600  | 1.19116700 |
| C | -6.48037900 | 0.63120800  | 1.02718100 |
| H | -7.44650000 | 0.42679100  | 0.56591300 |
| H | -6.67637300 | 2.75998100  | 0.85556400 |
| H | -4.97595900 | 4.35929100  | 1.59020200 |
| C | -1.64438600 | -0.55704200 | 7.46472300 |
| C | -0.81202000 | -1.20771200 | 6.58834500 |
| C | -0.86337700 | -0.93279900 | 5.20134600 |
| H | -1.59913400 | -0.77798200 | 8.52950800 |

|   |             |             |             |
|---|-------------|-------------|-------------|
| H | -0.10015100 | -1.95225100 | 6.94462700  |
| C | -0.02885900 | -1.61381300 | 4.28264500  |
| H | 0.66739300  | -2.36494300 | 4.65771700  |
| C | -4.47151600 | -0.19378200 | 2.08474400  |
| H | -3.86560400 | -1.02091000 | 2.45066000  |
| C | -2.63403700 | 0.69124400  | 5.64524300  |
| H | -3.35003300 | 1.42792200  | 5.28535100  |
| H | -6.01561200 | -1.46839500 | 1.34395900  |
| H | -3.23098400 | 0.90327200  | 7.68388400  |
| C | -0.99753500 | -0.36345200 | 2.43843700  |
| C | -2.32892500 | 2.72997800  | 2.98229300  |
| C | -3.23828000 | -1.66674400 | -1.48626500 |
| C | -3.86342900 | -0.47452300 | -1.94354200 |
| C | -3.91889000 | -2.91319300 | -1.64140300 |
| C | -5.24369400 | -0.51350200 | -2.15453200 |
| C | -5.29589000 | -2.85852700 | -1.84255900 |
| C | -6.00153600 | -1.67197300 | -2.02973700 |
| H | -5.74025700 | 0.41020200  | -2.43669300 |

|    |             |             |             |   |             |             |             |
|----|-------------|-------------|-------------|---|-------------|-------------|-------------|
| H  | -5.83793600 | -3.80064600 | -1.90825300 | H | 4.51729600  | 2.09526700  | -3.78990700 |
| C  | -3.28051700 | -4.30712100 | -1.85066700 | H | 4.24477700  | 3.47578100  | -2.69692600 |
| C  | -3.14304400 | 0.82341200  | -2.35193600 | C | 2.16950700  | 0.73596000  | -3.26718300 |
| H  | -2.78528700 | 4.82136000  | 2.66150700  | H | 2.55869700  | 0.08266000  | -2.48036200 |
| C  | -7.51357300 | -1.70575800 | -2.22205300 | H | 1.08290500  | 0.57520100  | -3.33702000 |
| H  | -1.37479400 | 2.93674200  | 3.46930700  | H | 2.62274600  | 0.40597900  | -4.21397400 |
| C  | 4.49866700  | -2.60564500 | 2.87692500  | C | 2.13235200  | 2.93526000  | -4.34644500 |
| C  | 3.89768200  | -1.37005100 | 0.87774000  | H | 2.27417800  | 4.02273900  | -4.28154100 |
| C  | 5.71704400  | -2.99910100 | 2.27445400  | H | 2.79175600  | 2.55946500  | -5.13933900 |
| H  | 4.27989400  | -2.93688400 | 3.89202900  | H | 1.10267400  | 2.73453900  | -4.67221300 |
| C  | 5.08189600  | -1.72997400 | 0.25100200  | C | -2.22274700 | 5.54062200  | -0.54278800 |
| C  | 6.01454500  | -2.56198200 | 0.94917900  | H | -1.87283700 | 5.91476500  | 0.42854000  |
| C  | 6.64240900  | -3.82191400 | 2.96035200  | H | -2.98851800 | 6.24374100  | -0.89866500 |
| C  | 7.23396200  | -2.98542400 | 0.36012900  | H | -2.70523000 | 4.56838800  | -0.36975900 |
| C  | 7.81674500  | -4.20733100 | 2.36432000  | C | -1.70057500 | 5.19494200  | -2.94929500 |
| H  | 6.39942800  | -4.14449000 | 3.97277000  | H | -0.95694200 | 5.26851300  | -3.75376100 |
| C  | 8.11146100  | -3.78557900 | 1.04976400  | H | -2.17852400 | 4.20730300  | -3.01847500 |
| H  | 7.46835700  | -2.67046000 | -0.65513100 | H | -2.46998400 | 5.95165100  | -3.15321900 |
| H  | 8.52139500  | -4.84061000 | 2.90007900  | C | -0.36536700 | 6.80275700  | -1.61765300 |
| H  | 9.04129200  | -4.09948500 | 0.57897300  | H | -1.06904100 | 7.60189800  | -1.89330700 |
| C  | 5.39039100  | -1.30750400 | -1.14369300 | H | 0.07243500  | 7.05532100  | -0.64203400 |
| C  | 6.30210100  | -0.24100200 | -1.41007600 | H | 0.44488100  | 6.78855100  | -2.36024500 |
| C  | 4.80788500  | -1.98463000 | -2.19293100 | C | 3.31527400  | 3.94937300  | 2.15797500  |
| C  | 6.58913100  | 0.09694600  | -2.76679700 | H | 4.01723500  | 3.20774100  | 1.75921600  |
| C  | 6.91505000  | 0.51644000  | -0.37986400 | H | 3.49401700  | 4.89863300  | 1.63406400  |
| C  | 5.08796800  | -1.63996400 | -3.53303600 | H | 3.57235900  | 4.09116500  | 3.21705100  |
| H  | 4.10346300  | -2.78831800 | -1.97982400 | C | 1.57548800  | 2.23384100  | 2.80733600  |
| C  | 7.47168300  | 1.17068700  | -3.03875800 | H | 0.54249800  | 1.89075600  | 2.64759600  |
| C  | 5.96613500  | -0.62564300 | -3.81426900 | H | 2.24326600  | 1.41411000  | 2.52164100  |
| C  | 7.75984600  | 1.55864500  | -0.67615800 | H | 1.71060600  | 2.40405300  | 3.88545800  |
| H  | 6.69904600  | 0.26778100  | 0.65896600  | C | 1.06753600  | 4.63199800  | 2.78815300  |
| H  | 4.60204700  | -2.19000700 | -4.33745700 | H | 1.43915400  | 4.67714500  | 3.81988400  |
| C  | 8.04250800  | 1.89090800  | -2.01901700 | H | 1.21290600  | 5.62504100  | 2.34188100  |
| H  | 7.67863500  | 1.42069500  | -4.07990000 | H | -0.01111000 | 4.43166400  | 2.84113600  |
| H  | 6.19305600  | -0.35062000 | -4.84488400 | C | -1.66018400 | 0.59936600  | -2.66369500 |
| H  | 8.21558500  | 2.13270300  | 0.12870800  | H | -1.22848400 | 1.52107900  | -3.08260000 |
| H  | 8.71348900  | 2.71873600  | -2.24140500 | H | -1.03614700 | 0.36523800  | -1.79440900 |
| P  | 2.59247000  | -0.33505500 | 0.11217000  | H | -1.52410500 | -0.20749500 | -3.40015600 |
| P  | 3.42829900  | 1.52278800  | 0.09259300  | C | -3.33624500 | 1.92262000  | -1.30511300 |
| C  | 2.06171100  | 2.65248400  | -0.45537000 | H | -2.76936300 | 2.81673200  | -1.60030400 |
| C  | 1.71502100  | 2.81408800  | -1.82833600 | H | -4.39632700 | 2.20194800  | -1.21792100 |
| C  | 1.41369300  | 3.44485000  | 0.54629400  | H | -2.98928800 | 1.62653900  | -0.30768100 |
| C  | 0.63943100  | 3.65769800  | -2.13317100 | C | -3.73909500 | 1.32888500  | -3.68103500 |
| C  | 0.36179700  | 4.26788300  | 0.14092800  | H | -4.77285200 | 1.68009600  | -3.58922500 |
| C  | -0.05370500 | 4.39363000  | -1.18168400 | H | -3.14517700 | 2.18257600  | -4.03608100 |
| H  | 0.35611300  | 3.78153300  | -3.17150100 | H | -3.70644600 | 0.55030500  | -4.45541100 |
| H  | -0.13911100 | 4.88089800  | 0.88084700  | C | -8.10272100 | -0.31658900 | -2.45885900 |
| C  | 2.49068900  | 2.21869300  | -3.03326900 | H | -7.87976300 | 0.37373100  | -1.63323500 |
| C  | -1.08940000 | 5.44836200  | -1.56976900 | H | -7.72938900 | 0.13282500  | -3.38961100 |
| C  | 1.84015200  | 3.53652400  | 2.03713800  | H | -9.19502600 | -0.39182300 | -2.54441500 |
| P  | -0.97855100 | 0.16494700  | 0.67189700  | C | -7.84848300 | -2.57307100 | -3.44337700 |
| Pd | 0.53112100  | -1.35869600 | -0.41900300 | H | -7.36741000 | -2.17592500 | -4.34803400 |
| Cl | 1.49905800  | -3.16931700 | -1.72257700 | H | -7.52444400 | -3.61452800 | -3.31700000 |
| P  | -1.78817300 | -1.62959300 | -0.32802900 | H | -8.93489200 | -2.58158000 | -3.61072800 |
| Cl | -2.44489900 | -2.92142400 | 1.16974000  | C | -8.17385200 | -2.30883700 | -0.97666900 |
| C  | 4.00363600  | 2.41753400  | -2.87270200 | H | -9.26031000 | -2.38382700 | -1.12551900 |
| H  | 4.45171800  | 1.82784800  | -2.06148400 | H | -7.79564000 | -3.31577500 | -0.75643400 |

|   |             |             |             |   |             |             |             |
|---|-------------|-------------|-------------|---|-------------|-------------|-------------|
| H | -7.99981500 | -1.68237600 | -0.08954800 | C | -1.75488200 | -4.34934000 | -1.81037200 |
| C | -3.83781400 | -5.36770200 | -0.89665000 | H | -1.29701800 | -3.58659400 | -2.45484800 |
| H | -3.41712900 | -6.34866600 | -1.15862600 | H | -1.32881300 | -4.25076300 | -0.80678000 |
| H | -3.57200100 | -5.15584300 | 0.14563100  | H | -1.42180600 | -5.32682700 | -2.18628500 |
| H | -4.93007800 | -5.45434400 | -0.95852100 | C | 3.61078200  | -1.81892600 | 2.19583100  |
| C | -3.65176700 | -4.70517200 | -3.29702100 | H | 2.67991600  | -1.51225800 | 2.67485600  |
| H | -3.20211600 | -5.67951300 | -3.53382000 | C | -0.10394900 | -1.34611300 | 2.94344500  |
| H | -4.73401800 | -4.79089400 | -3.45233600 | H | 0.52295200  | -1.89754600 | 2.24122600  |
| H | -3.26375500 | -3.96833100 | -4.01427700 |   |             |             |             |

### 10E-H

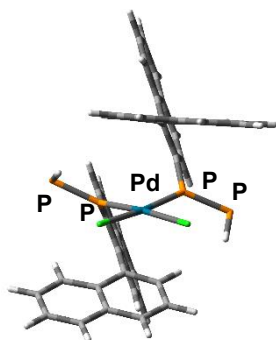

|   |             |             |             |   |            |             |             |
|---|-------------|-------------|-------------|---|------------|-------------|-------------|
| C | -4.94197800 | 3.60876100  | -1.91034300 | C | 1.72899100 | 3.79404500  | -0.81955100 |
| C | -4.68480600 | -1.55816000 | 2.54485500  | C | 1.61300500 | 1.38018400  | -0.84034100 |
| C | -3.27941200 | 2.47001400  | -0.55476300 | C | 2.79579100 | 3.73914000  | 0.10914500  |
| C | -3.76941200 | -0.97084200 | 0.37188700  | H | 1.36321300 | 4.76732500  | -1.14574000 |
| C | -3.13563900 | -0.05588600 | -0.52777200 | C | 2.66356300 | 1.27658000  | 0.06995700  |
| C | -2.66416500 | 1.27627700  | -0.06980100 | C | 3.27883300 | 2.47027500  | 0.55497600  |
| C | -3.28271700 | -1.70839700 | -2.30987000 | C | 3.39810500 | 4.92175700  | 0.60117800  |
| C | -3.83658300 | -2.62249200 | -1.44878100 | C | 3.13527200 | -0.05559300 | 0.52771200  |
| C | -4.10077100 | -2.27859900 | -0.10184700 | P | 0.61475300 | 0.02011100  | -3.46206300 |
| C | -4.69246100 | -3.20878600 | 0.78846200  | C | 4.37743700 | 2.44449200  | 1.45346500  |
| C | -4.96993900 | -2.86359400 | 2.08661600  | C | 4.44450200 | 4.86092200  | 1.48663600  |
| H | -5.42109300 | -3.58708000 | 2.76279800  | H | 3.01460400 | 5.88171500  | 0.25644800  |
| H | -4.92469000 | -4.20627700 | 0.41556300  | C | 3.76958300 | -0.97007100 | -0.37202300 |
| H | -4.09316500 | -3.62465900 | -1.79185500 | C | 2.93454100 | -0.42524500 | 1.84380600  |
| C | -4.44515700 | 4.86067400  | -1.48628300 | C | 4.94140000 | 3.60899500  | 1.91057100  |
| C | -3.39882200 | 4.92149100  | -0.60075200 | H | 4.77164600 | 1.48428500  | 1.77922700  |
| C | -2.79648400 | 3.73886400  | -0.10877000 | H | 4.89989700 | 5.77682600  | 1.85823500  |
| H | -4.90057100 | 5.77658800  | -1.85784000 | C | 4.10150800 | -2.27773000 | 0.10157600  |
| H | -3.01540100 | 5.88144000  | -0.25590800 | C | 4.10570600 | -0.63427500 | -1.70945500 |
| C | -1.72978700 | 3.79375100  | 0.82004700  | C | 3.28281000 | -1.70831000 | 2.30956800  |
| H | -1.36409400 | 4.76702500  | 1.14635600  | H | 2.47899800 | 0.29128100  | 2.52848600  |
| C | -4.10579000 | -0.63533700 | 1.70933300  | H | 5.78225000 | 3.56868600  | 2.60009000  |
| H | -3.90373000 | 0.37140800  | 2.07402600  | C | 3.83742000 | -2.62193100 | 1.44845600  |
| C | -4.37797900 | 2.44425300  | -1.45329800 | C | 4.69366500 | -3.20752500 | -0.78884300 |
| H | -4.77212800 | 1.48404300  | -1.77912200 | C | 4.68514100 | -1.55672800 | -2.54508800 |
| H | -4.93245100 | -1.28009500 | 3.56770600  | H | 3.90291000 | 0.37238600  | -2.07400400 |
| H | -5.78282800 | 3.56848300  | -2.59986200 | H | 3.09346800 | -1.97158000 | 3.34871700  |
| C | -1.61370000 | 1.37988000  | 0.84063000  | H | 4.09465100 | -3.62395800 | 1.79145200  |
| C | -2.93508700 | -0.42519600 | -1.84400500 | C | 4.97095900 | -2.86206100 | -2.08696100 |
| P | -0.61513500 | 0.01915200  | 3.46210300  | H | 4.92636000 | -4.20495900 | -0.41608100 |
| H | -3.09338900 | -1.97141700 | -3.34908400 | H | 4.93255200 | -1.27848100 | -3.56794600 |
| H | -2.48017800 | 0.29166000  | -2.52876300 | H | 5.42247600 | -3.58525500 | -2.76321000 |

|    |             |             |             |
|----|-------------|-------------|-------------|
| P  | 0.77973000  | -0.10801800 | -1.44462700 |
| P  | -0.77988800 | -0.10812000 | 1.44457700  |
| Pd | 0.00032500  | -1.70897200 | 0.00003500  |
| Cl | -0.60167800 | -3.36809400 | 1.59529600  |
| Cl | 0.60250600  | -3.36769400 | -1.59563600 |
| C  | -1.15210000 | 2.64664200  | 1.29007100  |

|   |             |             |             |
|---|-------------|-------------|-------------|
| H | -0.31110500 | 2.69813500  | 1.98122900  |
| C | 1.15131000  | 2.64695100  | -1.28963200 |
| H | 0.31022300  | 2.69848300  | -1.98067400 |
| H | -0.12300900 | -1.19713200 | -3.51905900 |
| H | 0.12315300  | -1.19778600 | 3.51849800  |

### 10E-Me

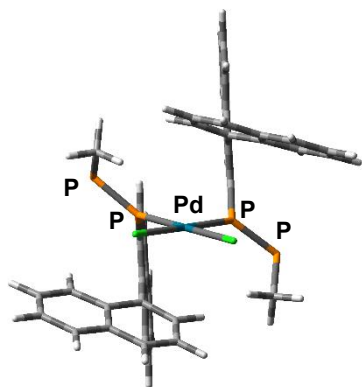

|   |             |             |             |
|---|-------------|-------------|-------------|
| C | 5.24679600  | 3.33916500  | 2.11588400  |
| C | 4.94244500  | -1.23343100 | -2.68883200 |
| C | 3.49479700  | 2.37664400  | 0.73746100  |
| C | 3.95991800  | -0.92190300 | -0.49027400 |
| C | 3.28069900  | -0.12932400 | 0.48603100  |
| C | 2.82643400  | 1.25053600  | 0.17127100  |
| C | 3.38977900  | -1.97918800 | 2.06420000  |
| C | 3.99636700  | -2.77463100 | 1.12457400  |
| C | 4.29629900  | -2.27096200 | -0.16348400 |
| C | 4.93714400  | -3.07821600 | -1.13608800 |
| C | 5.24437400  | -2.57757100 | -2.37531700 |
| H | 5.73257800  | -3.20842100 | -3.11564600 |
| H | 5.17959200  | -4.10881100 | -0.87652000 |
| H | 4.26418200  | -3.80519000 | 1.35760900  |
| C | 4.76846000  | 4.63783300  | 1.83320100  |
| C | 3.68582000  | 4.80852000  | 1.00784600  |
| C | 3.02907600  | 3.69297700  | 0.43450300  |
| H | 5.26680800  | 5.50250200  | 2.26731400  |
| H | 3.31481100  | 5.80629800  | 0.77468800  |
| C | 1.92595100  | 3.85875200  | -0.43657900 |
| H | 1.57350300  | 4.86688200  | -0.65461300 |
| C | 4.32215100  | -0.42526600 | -1.76856500 |
| H | 4.10749300  | 0.61412900  | -2.01580700 |
| C | 4.62833500  | 2.23720800  | 1.58086600  |
| H | 5.00592400  | 1.24000800  | 1.79828700  |
| H | 5.21210700  | -0.83416200 | -3.66489300 |
| H | 6.11445800  | 3.21376900  | 2.76053400  |
| C | 1.74721700  | 1.45980800  | -0.68235300 |
| C | 3.03488500  | -0.65421500 | 1.73916000  |
| P | 0.72555500  | 0.36986200  | -3.37665200 |
| H | 3.17080100  | -2.36631400 | 3.05808900  |
| H | 2.54029400  | -0.02698500 | 2.48236600  |
| C | -1.92611400 | 3.85874500  | 0.43753500  |
| C | -1.74749900 | 1.45973100  | 0.68281100  |
| C | -3.02886700 | 3.69319200  | -0.43405700 |

|    |             |             |             |
|----|-------------|-------------|-------------|
| H  | -1.57375100 | 4.86681500  | 0.65598100  |
| C  | -2.82642900 | 1.25067600  | -0.17124200 |
| C  | -3.49451200 | 2.37693800  | -0.73748500 |
| C  | -3.68533300 | 4.80889500  | -1.00740600 |
| C  | -3.28073300 | -0.12910400 | -0.48626600 |
| P  | -0.72574600 | 0.36940800  | 3.37698000  |
| C  | -4.62774300 | 2.23775800  | -1.58135300 |
| C  | -4.76765400 | 4.63844800  | -1.83322500 |
| H  | -3.31438000 | 5.80660100  | -0.77385200 |
| C  | -3.95983900 | -0.92185800 | 0.49000200  |
| C  | -3.03505100 | -0.65381100 | -1.73949200 |
| C  | -5.24593600 | 3.33986300  | -2.11637400 |
| H  | -5.00531100 | 1.24063000  | -1.79913300 |
| H  | -5.26579900 | 5.50323600  | -2.26733200 |
| C  | -4.29618100 | -2.27089100 | 0.16306500  |
| C  | -4.32210200 | -0.42540300 | 1.76835300  |
| C  | -3.38992000 | -1.97876100 | -2.06467900 |
| H  | -2.54057100 | -0.02647000 | -2.48267700 |
| H  | -6.11334500 | 3.21464500  | -2.76139900 |
| C  | -3.99633000 | -2.77437500 | -1.12509000 |
| C  | -4.93688900 | -3.07832300 | 1.13560200  |
| C  | -4.94228700 | -1.23373100 | 2.68855600  |
| H  | -4.10763400 | 0.61400400  | 2.01569900  |
| H  | -3.17104900 | -2.36572500 | -3.05865400 |
| H  | -4.26410700 | -3.80492300 | -1.35822000 |
| C  | -5.24408100 | -2.57786700 | 2.37492000  |
| H  | -5.17929000 | -4.10889800 | 0.87591100  |
| H  | -5.21198300 | -0.83457100 | 3.66465100  |
| H  | -5.73216500 | -3.20886200 | 3.11520600  |
| P  | -0.85796200 | 0.03845500  | 1.37689900  |
| P  | 0.85761700  | 0.03864800  | -1.37660000 |
| Pd | -0.00015500 | -1.59027500 | 0.00005200  |
| Cl | 0.88408000  | -3.26624400 | -1.45465500 |
| Cl | -0.88439300 | -3.26643100 | 1.45454800  |
| C  | 1.30066400  | 2.77389500  | -0.98844600 |

|   |             |             |             |
|---|-------------|-------------|-------------|
| H | 0.43722300  | 2.90966500  | -1.63842200 |
| C | -1.30106500 | 2.77374800  | 0.98938400  |
| H | -0.43789900 | 2.90936000  | 1.63975100  |
| C | 0.31865500  | -1.03859600 | 3.96848300  |
| H | -0.25595300 | -1.59423800 | 4.71954400  |
| H | 0.61686700  | -1.72861300 | 3.17207800  |
| H | 1.20613300  | -0.62468900 | 4.46491900  |

|   |             |             |             |
|---|-------------|-------------|-------------|
| C | -0.31869600 | -1.03809900 | -3.96852300 |
| H | 0.25606000  | -1.59357700 | -4.71959000 |
| H | -0.61700300 | -1.72827700 | -3.17229100 |
| H | -1.20611800 | -0.62414700 | -4.46501700 |

### 10E-Ph

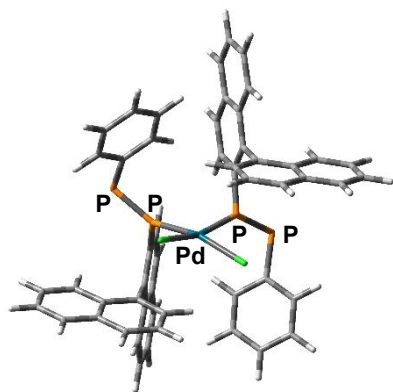

|   |             |             |             |
|---|-------------|-------------|-------------|
| C | 6.53854700  | -1.87245800 | 1.65985600  |
| C | 5.35385300  | 3.72144000  | -0.36931300 |
| C | 4.42256700  | -0.68781300 | 1.56835600  |
| C | 4.31658400  | 1.60230200  | -0.94154700 |
| C | 3.66654500  | 0.38242700  | -0.58228400 |
| C | 3.43843400  | 0.05477000  | 0.85071200  |
| C | 3.55666300  | -0.25351800 | -2.92522500 |
| C | 4.18069900  | 0.90968700  | -3.29495600 |
| C | 4.56786000  | 1.86407300  | -2.32212900 |
| C | 5.20895900  | 3.07314300  | -2.68818200 |
| C | 5.59220600  | 3.98456200  | -1.73608700 |
| H | 6.08402000  | 4.90990100  | -2.03023300 |
| H | 5.39296700  | 3.26368300  | -3.74567900 |
| H | 4.38532500  | 1.12280200  | -4.34426700 |
| C | 6.29233600  | -2.22199800 | 3.00628800  |
| C | 5.14447200  | -1.80221800 | 3.63007900  |
| C | 4.18761800  | -1.02296800 | 2.93637400  |
| H | 7.02073300  | -2.82117600 | 3.54899600  |
| H | 4.95016200  | -2.05948500 | 4.67096800  |
| C | 3.00470400  | -0.57061700 | 3.57036500  |
| H | 2.84188100  | -0.81687000 | 4.61914500  |
| C | 4.73492600  | 2.55792000  | 0.01891000  |
| H | 4.56212400  | 2.36007200  | 1.07690500  |
| C | 5.62826500  | -1.12200900 | 0.95764100  |
| H | 5.81876500  | -0.85869900 | -0.08160300 |
| H | 5.66821200  | 4.44447500  | 0.38120600  |
| H | 7.45702900  | -2.20140600 | 1.17789900  |
| C | 2.29009700  | 0.47021900  | 1.50827400  |
| C | 3.30107500  | -0.51655000 | -1.56359600 |
| P | 0.83089700  | 3.18593300  | 1.36622200  |
| C | -0.68452100 | 3.81405500  | 0.56615400  |
| C | -0.59419900 | 4.98509000  | -0.19782400 |
| C | -1.93621600 | 3.22213300  | 0.77877200  |
| C | -1.73622000 | 5.53319100  | -0.77035700 |

|   |             |             |             |
|---|-------------|-------------|-------------|
| C | -3.07839600 | 3.78822300  | 0.22126100  |
| C | -2.97789000 | 4.93653000  | -0.56049400 |
| H | -1.65895800 | 6.43342200  | -1.37678400 |
| H | -4.05037800 | 3.32502900  | 0.39793500  |
| H | 3.24702400  | -0.97870600 | -3.67568100 |
| H | 2.81004000  | -1.44914000 | -1.27957600 |
| C | -3.00421800 | 0.57074400  | 3.57073300  |
| C | -2.28989700 | -0.47021200 | 1.50860300  |
| C | -4.18718500 | 1.02312400  | 2.93685900  |
| H | -2.84126200 | 0.81702300  | 4.61948700  |
| C | -3.43828100 | -0.05472600 | 0.85115300  |
| C | -4.42230100 | 0.68793000  | 1.56888000  |
| C | -5.14393100 | 1.80243500  | 3.63064600  |
| C | -3.66659100 | -0.38244900 | -0.58179800 |
| P | -0.83069300 | -3.18598400 | 1.36646800  |
| C | -5.62805500 | 1.12214900  | 0.95828700  |
| C | -6.29185300 | 2.22223100  | 3.00697200  |
| H | -4.94949300 | 2.05973200  | 4.67150400  |
| C | -4.31680200 | -1.60227900 | -0.94089800 |
| C | -3.30116000 | 0.51643400  | -1.56321000 |
| C | 0.68470300  | -3.81401600 | 0.56627600  |
| C | -6.53823100 | 1.87265200  | 1.66058000  |
| H | -5.81867700 | 0.85881100  | -0.08092800 |
| H | -7.02016500 | 2.82145200  | 3.54974600  |
| C | -4.56831200 | -1.86409200 | -2.32143000 |
| C | -4.73508100 | -2.55781400 | 0.01966800  |
| C | -3.55697800 | 0.25335900  | -2.92478800 |
| H | -2.80997600 | 1.44898000  | -1.27930500 |
| C | 0.59438200  | -4.98500600 | -0.19776800 |
| C | 1.93638700  | -3.22207300 | 0.77889600  |
| H | -7.45675800 | 2.20161600  | 1.17872100  |
| C | -4.18120200 | -0.90979400 | -3.29436500 |
| C | -5.20961100 | -3.07310300 | -2.68732700 |
| C | -5.35421100 | -3.72127600 | -0.36840500 |

|   |             |             |             |    |             |             |             |
|---|-------------|-------------|-------------|----|-------------|-------------|-------------|
| H | -4.56207200 | -2.35994400 | 1.07762400  | Pd | -0.00010200 | -0.00008300 | -1.02921500 |
| H | -3.24739400 | 0.97848200  | -3.67533000 | Cl | 0.43563100  | 1.68528200  | -2.67368400 |
| C | 1.73639600  | -5.53303900 | -0.77037700 | Cl | -0.43600800 | -1.68573300 | -2.67338400 |
| C | 3.07856200  | -3.78809900 | 0.22130200  | C  | 2.07985100  | 0.16727800  | 2.88080400  |
| H | -4.38601700 | -1.12293800 | -4.34363300 | H  | 1.17490900  | 0.51579700  | 3.37722800  |
| C | -5.59281900 | -3.98443000 | -1.73512700 | C  | -2.07947900 | -0.16722300 | 2.88109700  |
| H | -5.39380300 | -3.26367300 | -3.74478600 | H  | -1.17450200 | -0.51577500 | 3.37743600  |
| H | -5.66852300 | -4.44424700 | 0.38219500  | H  | -3.87233200 | 5.37463900  | -0.99916000 |
| C | 2.97805800  | -4.93635900 | -0.56052000 | H  | -2.01922400 | 2.32451300  | 1.39358500  |
| H | 1.65913600  | -6.43323000 | -1.37686500 | H  | 0.37425400  | 5.46050300  | -0.35382100 |
| H | 4.05053800  | -3.32488600 | 0.39795800  | H  | 3.87249600  | -5.37441900 | -0.99924200 |
| H | -6.08480100 | -4.90972000 | -2.02914900 | H  | -0.37406800 | -5.46042100 | -0.35377800 |
| P | -0.98143700 | -1.31853100 | 0.57466100  | H  | 2.01939500  | -2.32447500 | 1.39374200  |
| P | 0.98148700  | 1.31844600  | 0.57443700  |    |             |             |             |

### 10E-Mes

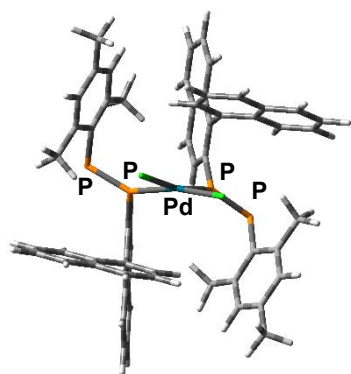

|   |             |             |             |   |             |             |             |
|---|-------------|-------------|-------------|---|-------------|-------------|-------------|
| C | -6.39994700 | 0.21774200  | 2.67517900  | H | -7.41993300 | 0.39878700  | 2.34177600  |
| C | -3.94314000 | -4.68581600 | -0.53381100 | C | -1.81658300 | -1.08444900 | 1.74218600  |
| C | -4.11743000 | -0.44989300 | 2.19198100  | C | -3.48105600 | 0.12973400  | -0.97291600 |
| C | -3.70827600 | -2.27740800 | -0.72691400 | P | 0.02494700  | -3.43923700 | 1.15178500  |
| C | -3.42475400 | -0.99318100 | -0.17110900 | C | 1.42562000  | -3.83617300 | 0.04468300  |
| C | -3.10069600 | -0.84539400 | 1.27324100  | C | 1.18329400  | -4.59232400 | -1.11991100 |
| C | -3.80901700 | 0.03599700  | -2.34099800 | C | 2.73649100  | -3.48717600 | 0.41837200  |
| C | -4.07261900 | -1.18907200 | -2.90080100 | C | 2.26431600  | -4.92260200 | -1.93221600 |
| C | -4.01997000 | -2.36850800 | -2.11804500 | C | 3.78589300  | -3.83371800 | -0.43381000 |
| C | -4.26823500 | -3.64320500 | -2.68539500 | C | 3.56858600  | -4.53541700 | -1.61814200 |
| C | -4.22408800 | -4.77855800 | -1.91544800 | H | 2.08335100  | -5.49833200 | -2.84231500 |
| H | -4.41180900 | -5.75229400 | -2.36419700 | H | 4.80408800  | -3.54981100 | -0.15889700 |
| H | -4.49592800 | -3.70162600 | -3.74981300 | C | 3.02775400  | -2.77560600 | 1.70738300  |
| H | -4.32091200 | -1.27555900 | -3.95861400 | C | -0.20149000 | -5.02509800 | -1.49672400 |
| C | -6.05997600 | 0.42790000  | 4.03005000  | H | -3.83693700 | 0.94181300  | -2.94571800 |
| C | -4.78093000 | 0.18606200  | 4.46558600  | C | 4.70469900  | -4.88925200 | -2.52893100 |
| C | -3.78327900 | -0.26284900 | 3.56739600  | H | -3.27178700 | 1.10957800  | -0.53990200 |
| H | -6.81792500 | 0.77682600  | 4.72872200  | C | 2.46060500  | 0.52044200  | 4.00338500  |
| H | -4.51142100 | 0.33572300  | 5.51083400  | C | 1.81658500  | 1.08451200  | 1.74221100  |
| C | -2.46059800 | -0.52033700 | 4.00335400  | C | 3.78327500  | 0.26290200  | 3.56742200  |
| H | -2.21898400 | -0.38729000 | 5.05760400  | H | 2.21899800  | 0.38742100  | 5.05763900  |
| C | -3.69627100 | -3.46555000 | 0.04666400  | C | 3.10069300  | 0.84543000  | 1.27326500  |
| H | -3.49081200 | -3.40135000 | 1.11515000  | C | 4.11742100  | 0.44990700  | 2.19200100  |
| C | -5.45371500 | -0.21287400 | 1.77828800  | C | 4.78091200  | -0.18604800 | 4.46560900  |
| H | -5.72034900 | -0.37073300 | 0.73466900  | C | 3.42475000  | 0.99320100  | -0.17108700 |
| H | -3.92546600 | -5.58854800 | 0.07450300  | P | -0.02503000 | 3.43920900  | 1.15175500  |

|   |             |             |             |    |             |             |             |
|---|-------------|-------------|-------------|----|-------------|-------------|-------------|
| C | 5.45368100  | 0.21278600  | 1.77829100  | H  | -4.80417900 | 3.55006200  | -0.15884000 |
| C | 6.05993600  | -0.42797400 | 4.03005900  | H  | 4.41183500  | 5.75233200  | -2.36413100 |
| H | 4.51140700  | -0.33567300 | 5.51086300  | C  | -4.70474600 | 4.88938200  | -2.52894000 |
| C | 3.70827600  | 2.27743400  | -0.72687900 | P  | 0.51154700  | 1.56411500  | 0.56839400  |
| C | 3.48106200  | -0.12970300 | -0.97290300 | P  | -0.51150700 | -1.56410900 | 0.56842700  |
| C | -1.42567700 | 3.83614400  | 0.04463100  | Pd | 0.00004100  | -0.00001900 | -1.05169200 |
| C | 6.39989800  | -0.21787300 | 2.67517700  | Cl | -0.07454600 | -1.68602300 | -2.73729900 |
| H | 5.72030900  | 0.37059700  | 0.73466300  | Cl | 0.07466100  | 1.68583200  | -2.73746000 |
| H | 6.81787400  | -0.77693100 | 4.72872700  | C  | -1.50014800 | -0.93512400 | 3.11938000  |
| C | 4.02000000  | 2.36854500  | -2.11800200 | H  | -0.48485200 | -1.13574200 | 3.46217800  |
| C | 3.69625600  | 3.46557000  | 0.04670400  | C  | 1.50015400  | 0.93522300  | 3.11940900  |
| C | 3.80906800  | -0.03595800 | -2.34097500 | H  | 0.48486100  | 1.13585100  | 3.46220700  |
| H | 3.27177400  | -1.10954800 | -0.53990500 | H  | 0.82347100  | 4.15652800  | -1.75984300 |
| C | -1.18332500 | 4.59221600  | -1.12001400 | H  | 0.70769400  | 5.55095600  | -0.67346900 |
| C | -2.73656900 | 3.48727600  | 0.41836800  | H  | 0.18240900  | 5.69836300  | -2.36173700 |
| H | 7.41986600  | -0.39900000 | 2.34176200  | H  | -4.57061300 | 4.43999000  | -3.52229900 |
| C | 4.07267700  | 1.18911300  | -2.90076500 | H  | -4.77183500 | 5.97516900  | -2.67969500 |
| C | 4.26827200  | 3.64324400  | -2.68534300 | H  | -5.66521900 | 4.54289300  | -2.13014200 |
| C | 3.94313800  | 4.68583900  | -0.53375900 | H  | -4.10511700 | 2.60589500  | 1.83208700  |
| H | 3.49077900  | 3.40136900  | 1.11518700  | H  | -2.67936900 | 3.35392200  | 2.57619700  |
| H | 3.83701200  | -0.94177900 | -2.94568900 | H  | -2.53244800 | 1.79549000  | 1.76233600  |
| C | -2.26434000 | 4.92252500  | -1.93231300 | H  | 4.10501600  | -2.60572400 | 1.83207400  |
| C | 0.20147700  | 5.02489400  | -1.49686900 | H  | 2.67919200  | -3.35361200 | 2.57619000  |
| C | -3.78596800 | 3.83386700  | -0.43379700 | H  | 2.53239300  | -1.79525700 | 1.76217200  |
| C | -3.02785700 | 2.77581000  | 1.70743000  | H  | 4.77169200  | -5.97501400 | -2.67989800 |
| H | 4.32100300  | 1.27560900  | -3.95857000 | H  | 4.57064700  | -4.43965200 | -3.52220700 |
| C | 4.22410800  | 4.77859300  | -1.91539100 | H  | 5.66518800  | -4.54292300 | -2.13003300 |
| H | 4.49598300  | 3.70166900  | -3.74975700 | H  | -0.82351000 | -4.15677400 | -1.75979000 |
| H | 3.92545800  | 5.58856600  | 0.07456300  | H  | -0.70770500 | -5.55108900 | -0.67327700 |
| C | -3.56863600 | 4.53547600  | -1.61817500 | H  | -0.18239900 | -5.69864800 | -2.36152800 |
| H | -2.08335300 | 5.49818100  | -2.84245500 |    |             |             |             |

### 10<sub>E</sub>-Mes\*

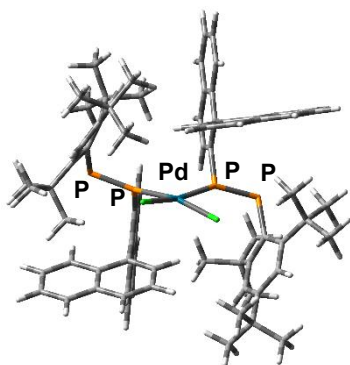

|   |             |            |             |   |             |            |             |
|---|-------------|------------|-------------|---|-------------|------------|-------------|
| C | -6.25850900 | 0.66618400 | -3.39637100 | C | -4.90756600 | 4.00432100 | 2.02165800  |
| C | -4.55259600 | 4.99009500 | -0.15118100 | C | -5.00269500 | 5.08748900 | 1.18344000  |
| C | -3.96442000 | 1.02904900 | -2.69032200 | H | -5.41874800 | 6.02562100 | 1.54634400  |
| C | -3.93801200 | 2.66821800 | 0.20900300  | H | -5.24246700 | 4.07181000 | 3.05693000  |
| C | -3.42159800 | 1.41953600 | -0.25331300 | H | -4.58248200 | 1.75569900 | 3.46087000  |
| C | -2.99263500 | 1.26480200 | -1.67104600 | C | -5.83162000 | 0.50506800 | -4.73299900 |
| C | -3.74768800 | 0.46949400 | 1.96213100  | C | -4.49977700 | 0.60856200 | -5.04725000 |
| C | -4.25609600 | 1.65571800 | 2.42570800  | C | -3.53697300 | 0.87126100 | -4.04293600 |
| C | -4.37112500 | 2.77544600 | 1.56522700  | H | -6.56323800 | 0.29999000 | -5.51221700 |

|   |             |             |             |    |             |             |             |
|---|-------------|-------------|-------------|----|-------------|-------------|-------------|
| H | -4.15914800 | 0.48759100  | -6.07545900 | C  | -3.56932800 | -3.69134700 | 0.68439800  |
| C | -2.15986500 | 0.96963700  | -4.35386300 | C  | -3.19180100 | -3.57414100 | -1.79430300 |
| H | -1.84409100 | 0.85759300  | -5.39101300 | H  | 4.58245300  | -1.75547400 | 3.46091800  |
| C | -4.03443500 | 3.80966500  | -0.62724400 | C  | 5.00271600  | -5.08733800 | 1.18360200  |
| H | -3.69189800 | 3.74139600  | -1.65977600 | H  | 5.24243300  | -4.07160500 | 3.05706900  |
| C | -5.34925300 | 0.92436400  | -2.40094900 | H  | 4.62019500  | -5.85579800 | -0.80755500 |
| H | -5.68452300 | 1.03934600  | -1.37120500 | C  | -3.28234000 | -4.10614900 | 1.97852900  |
| H | -4.62011100 | 5.85589200  | -0.80772800 | H  | -1.87127100 | -5.19035200 | 3.15938100  |
| H | -7.31663000 | 0.58332800  | -3.15550400 | H  | -4.55932700 | -3.30010100 | 0.46408100  |
| C | -1.65391400 | 1.35683700  | -2.01914000 | H  | 5.41878100  | -6.02545100 | 1.54653800  |
| C | -3.34039000 | 0.34994500  | 0.61649800  | C  | -4.27394200 | -3.97710000 | 3.12970400  |
| P | -0.06725900 | 3.69807500  | -1.13192500 | P  | 0.37882100  | -1.70862400 | -0.75376500 |
| C | 1.32659300  | 4.18713100  | -0.03457900 | P  | -0.37881800 | 1.70855800  | -0.75376200 |
| C | 1.06260300  | 4.81753000  | 1.21603600  | Pd | 0.00002000  | -0.00003500 | 0.79119500  |
| C | 2.64532700  | 3.78754100  | -0.36371400 | Cl | 0.12432200  | 1.66101800  | 2.48886300  |
| C | 2.05770400  | 4.74709100  | 2.18473800  | Cl | -0.12420200 | -1.66109400 | 2.48887400  |
| C | 3.56934600  | 3.69136400  | 0.68436600  | C  | -1.39542300 | 4.72884800  | 1.91197100  |
| C | 3.28236100  | 4.10613900  | 1.97850600  | H  | -1.14687400 | 4.11222700  | 2.78556500  |
| H | 1.87127300  | 5.19028300  | 3.15938800  | H  | -1.69940600 | 4.04816300  | 1.10550800  |
| H | 4.55935300  | 3.30014700  | 0.46403400  | H  | -2.26737700 | 5.35272000  | 2.15758900  |
| C | 3.19179300  | 3.57416100  | -1.79433300 | C  | -0.60711600 | 6.49749800  | 0.32037100  |
| C | -0.21737400 | 5.62408900  | 1.52091900  | H  | -1.45185100 | 7.14520300  | 0.59427600  |
| H | -3.64822800 | -0.38997200 | 2.62506800  | H  | -0.93755700 | 5.91657000  | -0.55186400 |
| C | 4.27397300  | 3.97708800  | 3.12967300  | H  | 0.22876300  | 7.13747800  | 0.00485400  |
| H | -2.95579700 | -0.60776000 | 0.26157800  | C  | 0.00847300  | 6.59487800  | 2.68830200  |
| C | 2.15988500  | -0.96972600 | -4.35386100 | H  | 0.88094800  | 7.24239000  | 2.52367600  |
| C | 1.65391900  | -1.35688900 | -2.01913600 | H  | 0.13539600  | 6.07675500  | 3.64759200  |
| C | 3.53698500  | -0.87128500 | -4.04291700 | H  | -0.87502900 | 7.23886000  | 2.78993600  |
| H | 1.84412100  | -0.85771900 | -5.39101800 | C  | 4.70495100  | 5.37610500  | 3.58758300  |
| C | 2.99263000  | -1.26478100 | -1.67102400 | H  | 5.42575000  | 5.29796100  | 4.41417400  |
| C | 3.96442000  | -1.02902000 | -2.69029400 | H  | 3.85456700  | 5.97395600  | 3.94108000  |
| C | 4.49979300  | -0.60857700 | -5.04722500 | H  | 5.18660600  | 5.92484800  | 2.76611400  |
| C | 3.42158400  | -1.41945500 | -0.25328100 | C  | 3.60617500  | 3.24329500  | 4.29870400  |
| P | 0.06726400  | -3.69814200 | -1.13192500 | H  | 3.29578900  | 2.23035000  | 4.00411300  |
| C | 5.34924600  | -0.92428300 | -2.40090600 | H  | 2.71391300  | 3.76856000  | 4.66349700  |
| C | 5.83162800  | -0.50502900 | -4.73296100 | H  | 4.30911800  | 3.15306100  | 5.13905200  |
| H | 4.15917200  | -0.48764600 | -6.07544200 | C  | 5.52777700  | 3.19981700  | 2.73300900  |
| C | 3.93800400  | -2.66811600 | 0.20908200  | H  | 6.10451200  | 3.71860300  | 1.95457900  |
| C | 3.34037600  | -0.34983000 | 0.61648800  | H  | 5.28785800  | 2.19092500  | 2.36601800  |
| C | -1.32659600 | -4.18717700 | -0.03458000 | H  | 6.18265200  | 3.08887900  | 3.60778200  |
| C | 6.25850700  | -0.66609800 | -3.39632300 | C  | 3.44279700  | 2.09638400  | -2.08760900 |
| H | 5.68450800  | -1.03923000 | -1.37115500 | H  | 2.51005500  | 1.51219400  | -2.05707500 |
| H | 6.56324900  | -0.29994600 | -5.51217400 | H  | 4.14476900  | 1.65638900  | -1.36530800 |
| C | 4.37110100  | -2.77529600 | 1.56531400  | H  | 3.88120300  | 1.97465300  | -3.09021100 |
| C | 4.03446500  | -3.80958200 | -0.62713300 | C  | 2.30856300  | 4.15473500  | -2.90352000 |
| C | 3.74768000  | -0.46932200 | 1.96212400  | H  | 2.87848900  | 4.16907900  | -3.84279500 |
| H | 2.95577800  | 0.60786100  | 0.26153300  | H  | 2.00117900  | 5.18786400  | -2.68616800 |
| C | -1.06261300 | -4.81760200 | 1.21602300  | H  | 1.41011300  | 3.55861400  | -3.10823600 |
| C | -2.64532100 | -3.78753800 | -0.36369300 | C  | 4.53028600  | 4.32867400  | -1.91608100 |
| H | 7.31662300  | -0.58320300 | -3.15544500 | H  | 4.89864900  | 4.24876500  | -2.94783900 |
| C | 4.25607100  | -1.65553300 | 2.42575000  | H  | 5.31466900  | 3.92665600  | -1.26527500 |
| C | 4.90754900  | -4.00415000 | 2.02178900  | H  | 4.40523200  | 5.39472200  | -1.68103500 |
| C | 4.55264500  | -4.98998700 | -0.15103100 | C  | -5.52771800 | -3.19976500 | 2.73307600  |
| H | 3.69194900  | -3.74134600 | -1.65967300 | H  | -6.10448300 | -3.71850600 | 1.95463800  |
| H | 3.64824100  | 0.39018000  | 2.62502000  | H  | -5.28776500 | -2.19087400 | 2.36611000  |
| C | -2.05769900 | -4.74713900 | 2.18473900  | H  | -6.18258000 | -3.08882600 | 3.60785900  |
| C | 0.21733700  | -5.62421500 | 1.52087700  | C  | -4.70497700 | -5.37611800 | 3.58755600  |



|   |             |             |             |   |             |             |             |
|---|-------------|-------------|-------------|---|-------------|-------------|-------------|
| H | -3.85461500 | -5.97401900 | 3.94102400  | C | -2.30858000 | -4.15466200 | -2.90351500 |
| H | -5.18665800 | -5.92480700 | 2.76606600  | H | -2.87852200 | -4.16899900 | -3.84278100 |
| H | -5.42577000 | -5.29798000 | 4.41415400  | H | -2.00116900 | -5.18778400 | -2.68619500 |
| C | -3.60611100 | -3.24338500 | 4.29876600  | H | -1.41015400 | -3.55851700 | -3.10823100 |
| H | -3.29566600 | -2.23044700 | 4.00421200  | C | -3.44285100 | -2.09637300 | -2.08755100 |
| H | -2.71388200 | -3.76871400 | 4.66354500  | H | -2.51012500 | -1.51216100 | -2.05702700 |
| H | -4.30905300 | -3.15314400 | 5.13911200  | H | -4.14481800 | -1.65640500 | -1.36523300 |
| C | -0.00854700 | -6.59504300 | 2.68822200  | H | -3.88127600 | -1.97464000 | -3.09014400 |
| H | -0.88104800 | -7.24251900 | 2.52356400  | C | -4.53026100 | -4.32869500 | -1.91604100 |
| H | -0.13545500 | -6.07695300 | 3.64753300  | H | -4.89865900 | -4.24877200 | -2.94778600 |
| H | 0.87493400  | -7.23906200 | 2.78983700  | H | -5.31463200 | -3.92673300 | -1.26519900 |
| C | 0.60705800  | -6.49758900 | 0.32029400  | H | -4.40515500 | -5.39473600 | -1.68103100 |
| H | 1.45170100  | -7.14540400 | 0.59420400  | C | -1.23942100 | 1.21421200  | -3.36983000 |
| H | 0.93761400  | -5.91664000 | -0.55187900 | H | -0.18080500 | 1.29902400  | -3.61823900 |
| H | -0.22886700 | -7.13745700 | 0.00468400  | C | 1.23943800  | -1.21431800 | -3.36983500 |
| C | 1.39541200  | -4.72902200 | 1.91196700  | H | 0.18082700  | -1.29917600 | -3.61825500 |
| H | 1.14688400  | -4.11244000 | 2.78559400  |   |             |             |             |
| H | 1.69940400  | -4.04830200 | 1.10553400  |   |             |             |             |
| H | 2.26735300  | -5.35292900 | 2.15755000  |   |             |             |             |

### 11A-H

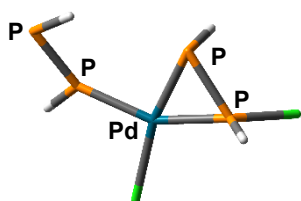

|    |             |             |             |    |             |             |             |
|----|-------------|-------------|-------------|----|-------------|-------------|-------------|
| P  | 2.33215100  | 0.15264300  | -0.38387500 | Cl | -3.62346700 | -0.44991000 | -0.69829800 |
| P  | 3.75311200  | -1.26322800 | -0.09626700 | H  | 2.80217600  | -2.19960300 | 0.40639200  |
| P  | -0.50911600 | -1.96677000 | 0.27486200  | H  | -2.63354300 | -0.55216300 | 1.82700800  |
| Pd | 0.07414000  | 0.37326700  | 0.09663600  | H  | -0.85924900 | -2.12850800 | -1.09904900 |
| Cl | 0.14140600  | 2.78115000  | 0.10202900  | H  | 3.06682200  | 1.24993700  | -0.88975700 |
| P  | -2.01558800 | -0.46738000 | 0.56839600  |    |             |             |             |

### 11A-Me

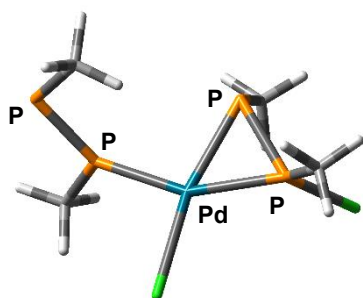

|    |             |             |             |   |             |             |             |
|----|-------------|-------------|-------------|---|-------------|-------------|-------------|
| P  | -2.22178400 | 0.17503500  | 0.44477300  | C | -2.86475000 | -1.97596600 | -1.52844100 |
| P  | -3.74363500 | -0.98990300 | -0.22089200 | H | -1.81092500 | -1.69632300 | -1.64972900 |
| P  | 0.78370100  | -1.79745300 | 0.21522200  | H | -2.92931100 | -3.04042200 | -1.27289800 |
| Pd | 0.00591700  | 0.45631700  | -0.16835300 | H | -3.38433300 | -1.82861900 | -2.48282400 |
| Cl | -0.21662400 | 2.83686400  | -0.60441700 | C | 3.03546000  | -0.68555200 | -1.98841800 |
| P  | 2.17702900  | -0.29468400 | -0.43061500 | H | 2.27746500  | -1.06074800 | -2.68701000 |
| Cl | 3.69832800  | 0.17410500  | 0.88454300  | H | 3.48461000  | 0.22444500  | -2.39891400 |

|   |            |             |             |
|---|------------|-------------|-------------|
| H | 3.80329700 | -1.44899800 | -1.82784300 |
| C | 1.04170600 | -1.76381000 | 2.06368500  |
| H | 0.10812000 | -2.10305400 | 2.52821200  |
| H | 1.84083600 | -2.46630900 | 2.33006400  |
| H | 1.28628900 | -0.77152300 | 2.45757000  |

|   |             |            |            |
|---|-------------|------------|------------|
| C | -2.88846300 | 1.27489300 | 1.75341500 |
| H | -3.96201200 | 1.12451500 | 1.91071600 |
| H | -2.35033400 | 1.08427200 | 2.68944100 |
| H | -2.69826500 | 2.31341400 | 1.45655400 |

### 11A-Ph

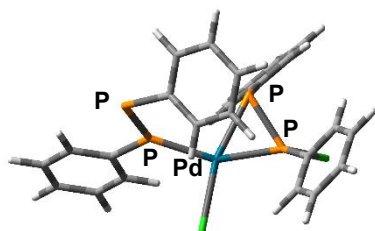

|   |             |             |             |
|---|-------------|-------------|-------------|
| C | 0.90459200  | 4.77024000  | 2.26700800  |
| C | 1.22391800  | 3.43106800  | 2.07336800  |
| C | -0.29614800 | 5.27774000  | 1.77613700  |
| C | -1.17561200 | 4.44291500  | 1.09247800  |
| H | -2.11534100 | 4.83614700  | 0.70830700  |
| C | 0.34902900  | 2.58638500  | 1.37835200  |
| C | 3.19887100  | -0.12349000 | -0.99091700 |
| C | 4.32790600  | -0.03903600 | -0.16843900 |
| C | 3.11120800  | -1.09767800 | -1.99127800 |
| C | 5.36867200  | -0.94085100 | -0.34689500 |
| C | 4.16212000  | -1.99378100 | -2.16358900 |
| C | 5.28370300  | -1.91569100 | -1.34137500 |
| H | 6.24711800  | -0.88946700 | 0.29282700  |
| H | 4.10142300  | -2.75610900 | -2.93732700 |
| C | -5.30690200 | 0.79422900  | -1.43490200 |
| C | -3.83107300 | -0.67472800 | -0.19644300 |
| C | -6.40173800 | 0.04922500  | -1.00878800 |
| C | -4.94109800 | -1.42165000 | 0.22574700  |
| C | -6.21650400 | -1.05799700 | -0.17940800 |
| P | -2.12677100 | -1.02829800 | 0.28937300  |
| P | -2.07409800 | -2.61351900 | 1.58056100  |
| C | -0.25670100 | -2.74099300 | 1.76698800  |
| C | 0.63972100  | -2.84478200 | 0.69216500  |
| C | 0.24367000  | -2.77894600 | 3.07607200  |
| C | 2.00870100  | -2.94047300 | 0.92851900  |
| C | 1.61219100  | -2.86402400 | 3.30651500  |

|    |             |             |             |
|----|-------------|-------------|-------------|
| C  | 2.49696200  | -2.93693100 | 2.23238000  |
| H  | 2.69691700  | -3.01362500 | 0.08627200  |
| H  | 1.98892100  | -2.87460300 | 4.32762100  |
| P  | 0.86050100  | 0.82479500  | 1.20780800  |
| Pd | -0.31545900 | 0.02005400  | -0.75868300 |
| Cl | -0.85039600 | -0.73156800 | -3.00742300 |
| P  | 1.77958400  | 0.95626400  | -0.73842000 |
| Cl | 2.34473600  | 2.84537800  | -1.35015800 |
| C  | -4.02534600 | 0.43470500  | -1.03226100 |
| C  | -0.85740800 | 3.10223200  | 0.89276300  |
| H  | -1.54740700 | 2.45510600  | 0.35034900  |
| H  | 3.56849500  | -3.00889600 | 2.41151500  |
| H  | 0.26814300  | -2.86260800 | -0.33354400 |
| H  | -0.44385800 | -2.72270900 | 3.92051500  |
| H  | 2.21892700  | -1.15562000 | -2.61668800 |
| H  | 6.10007300  | -2.62284300 | -1.47458900 |
| H  | 4.38304100  | 0.72239500  | 0.60946900  |
| H  | 2.16779000  | 3.03846600  | 2.45542700  |
| H  | 1.59514300  | 5.41931500  | 2.80242300  |
| H  | -0.54695300 | 6.32592100  | 1.92821800  |
| H  | -3.16290300 | 1.00821400  | -1.37574300 |
| H  | -5.44815600 | 1.65472300  | -2.08546300 |
| H  | -7.40539200 | 0.32763200  | -1.32420700 |
| H  | -7.07377800 | -1.64261100 | 0.14844000  |
| H  | -4.80953000 | -2.29082600 | 0.86942400  |

## 11A-Mes

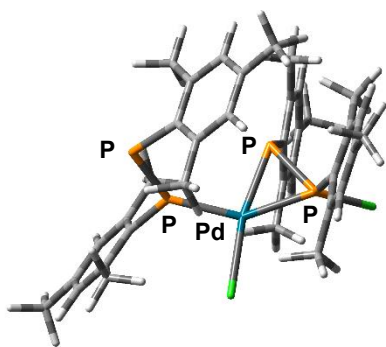

|    |             |             |             |   |             |             |             |
|----|-------------|-------------|-------------|---|-------------|-------------|-------------|
| C  | -0.58165000 | 5.01024700  | 1.20738300  | H | -0.72369100 | 0.78360500  | 3.31210200  |
| C  | 0.06132900  | 3.77237000  | 1.18976400  | C | 4.60577600  | -0.95291000 | 3.00412300  |
| C  | -1.54522600 | 5.35452500  | 0.26680000  | H | 4.87495100  | -1.10168900 | 4.05892800  |
| C  | -1.86349000 | 4.41440100  | -0.71039700 | H | 5.23788300  | -1.61345000 | 2.39785200  |
| H  | -2.62588200 | 4.66391700  | -1.45069100 | H | 4.86621300  | 0.08632200  | 2.75529800  |
| C  | -0.26405600 | 2.83003200  | 0.18156800  | C | 3.99780400  | 1.76950600  | 0.40200800  |
| C  | 3.21347900  | 0.00368600  | -1.28536000 | H | 3.48573300  | 2.56056300  | -0.16106000 |
| C  | 4.18078500  | 0.51110700  | -0.39055900 | H | 3.40014900  | 1.56786100  | 1.30575100  |
| C  | 3.46434900  | -1.17413900 | -2.02954400 | H | 4.96785100  | 2.16175500  | 0.72930800  |
| C  | 5.35979700  | -0.21037200 | -0.21515200 | C | 2.52110900  | -1.69616700 | -3.07125200 |
| C  | 4.64994300  | -1.86400000 | -1.79517900 | H | 1.60231000  | -2.11231300 | -2.63583900 |
| C  | 5.59897800  | -1.41120800 | -0.87898300 | H | 2.19970400  | -0.91014700 | -3.76917200 |
| H  | 6.11482500  | 0.17743800  | 0.47077900  | H | 3.00292800  | -2.48608400 | -3.65854200 |
| H  | 4.84754100  | -2.77761000 | -2.35854400 | C | 6.83989700  | -2.20312600 | -0.61041000 |
| C  | -5.81841700 | -0.41258700 | 0.32576700  | H | 6.61742900  | -3.05362500 | 0.05036600  |
| C  | -3.62899200 | -1.41593700 | 0.29998300  | H | 7.26162500  | -2.61917500 | -1.53380100 |
| C  | -6.37992900 | -1.57209300 | -0.20432500 | H | 7.60886900  | -1.59654700 | -0.11815500 |
| H  | -6.46299000 | 0.43982600  | 0.54753700  | C | -3.31760500 | -3.80510900 | -0.52129000 |
| C  | -4.17124200 | -2.60599300 | -0.22877700 | H | -2.92618600 | -4.25706800 | 0.40137400  |
| C  | -5.54149000 | -2.65602800 | -0.47029200 | H | -3.89391900 | -4.57465300 | -1.04779400 |
| P  | -1.83597600 | -1.24928400 | 0.56354000  | H | -2.45253200 | -3.54161900 | -1.14864000 |
| P  | -1.39398900 | -2.12371500 | 2.34597300  | C | -3.90316900 | 0.95786200  | 1.17618400  |
| C  | 0.40999600  | -1.75962800 | 2.43813900  | H | -3.44231900 | 0.78146900  | 2.15905300  |
| C  | 1.36429300  | -2.51771000 | 1.73345600  | H | -3.12866900 | 1.41672700  | 0.54229100  |
| C  | 0.82288700  | -0.72354300 | 3.30230300  | H | -4.69607800 | 1.70266200  | 1.30997400  |
| C  | 2.71947000  | -2.22981700 | 1.91901900  | C | -7.84835500 | -1.66349700 | -0.48786800 |
| C  | 2.18341700  | -0.47370400 | 3.45502000  | H | -8.03562500 | -1.83025200 | -1.55728400 |
| C  | 3.14880900  | -1.22067900 | 2.77809200  | H | -8.30610500 | -2.50581000 | 0.04792800  |
| H  | 3.46586800  | -2.81922400 | 1.37990700  | H | -8.37477300 | -0.74840700 | -0.19310600 |
| H  | 2.50319900  | 0.32897100  | 4.12429300  | C | -1.70495200 | 2.26050700  | -1.89349500 |
| P  | 0.62531400  | 1.21727600  | 0.39915300  | H | -0.90214200 | 2.03454500  | -2.60867700 |
| Pd | -0.37183500 | -0.41280200 | -1.03525600 | H | -2.08953900 | 1.29647600  | -1.52368300 |
| Cl | -1.11616900 | -1.85235800 | -2.87450000 | H | -2.51631700 | 2.73309200  | -2.45951200 |
| P  | 1.59561500  | 0.78777200  | -1.48332000 | C | 1.08888200  | 3.51505800  | 2.26047000  |
| Cl | 1.86909700  | 2.41389500  | -2.76572600 | H | 0.87635400  | 2.60753300  | 2.84289300  |
| C  | -4.45181300 | -0.30889900 | 0.58457900  | H | 2.09902200  | 3.39916800  | 1.84483000  |
| C  | -1.24933800 | 3.16400800  | -0.78238200 | H | 1.12234700  | 4.35546000  | 2.96314000  |
| C  | 0.97510400  | -3.61397700 | 0.78372300  | C | -2.21376700 | 6.69438000  | 0.29037200  |
| H  | 0.18507600  | -4.26044400 | 1.19230800  | H | -3.28415300 | 6.61305300  | 0.06306600  |
| H  | 0.58903200  | -3.20496700 | -0.16346500 | H | -2.10468100 | 7.18145000  | 1.26664000  |
| H  | 1.83850900  | -4.24474800 | 0.53977900  | H | -1.77772800 | 7.36609400  | -0.46235500 |
| C  | -0.17123500 | 0.14246100  | 4.01924500  | H | -0.32118800 | 5.72690600  | 1.98823200  |
| H  | -0.92632600 | -0.44467600 | 4.56223000  | H | -5.97036400 | -3.57221400 | -0.88143000 |
| H  | 0.32572900  | 0.79772300  | 4.74490700  |   |             |             |             |

### 11E-H

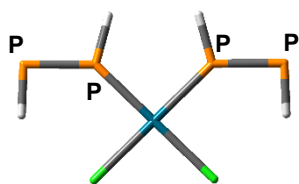

|    |             |             |             |
|----|-------------|-------------|-------------|
| P  | -3.65884200 | -1.28407800 | -0.04687200 |
| P  | 3.65874400  | -1.28412400 | 0.04786000  |
| P  | 1.64120800  | -1.27518800 | -0.03310400 |
| P  | -1.64126300 | -1.27506500 | 0.03240900  |
| Pd | 0.00002200  | 0.32262900  | -0.00013600 |
| Cl | -1.69168300 | 1.96868800  | 0.07008300  |

|    |             |             |             |
|----|-------------|-------------|-------------|
| Cl | 1.69177100  | 1.96867600  | -0.06996600 |
| H  | 3.71402900  | 0.13885100  | 0.08752000  |
| H  | -3.71420100 | 0.13890400  | -0.08629600 |
| H  | 1.27392600  | -2.63857600 | -0.08079700 |
| H  | -1.27393400 | -2.63846300 | 0.07943700  |

### 11E-Me

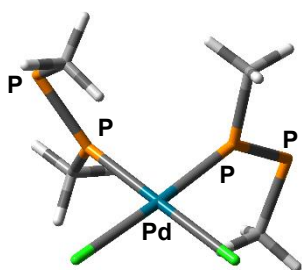

|    |             |             |             |
|----|-------------|-------------|-------------|
| P  | 3.02690200  | -1.70004300 | 0.24099000  |
| P  | -3.07448900 | -1.64371700 | -0.12303800 |
| P  | -1.45972500 | -0.78484800 | 0.73511200  |
| P  | 1.42209500  | -0.89823100 | -0.68892200 |
| Pd | 0.01346400  | 0.76465000  | -0.03692200 |
| Cl | 1.63927800  | 2.34653500  | -0.79286800 |
| Cl | -1.55514200 | 2.42992900  | 0.66484900  |
| C  | -3.03507000 | -0.82651700 | -1.78975700 |
| H  | -3.99581800 | -0.32049100 | -1.94160500 |
| H  | -2.22600500 | -0.09533300 | -1.90937000 |
| H  | -2.93802600 | -1.60308500 | -2.55773400 |
| C  | 3.04201400  | -0.69238800 | 1.80104600  |

|   |             |             |             |
|---|-------------|-------------|-------------|
| H | 3.98711400  | -0.13791500 | 1.84142300  |
| H | 2.20969100  | 0.01767000  | 1.88035900  |
| H | 3.01548000  | -1.37843200 | 2.65583600  |
| C | -1.19213600 | -1.36441400 | 2.44367800  |
| H | -1.97262300 | -2.06899500 | 2.75008100  |
| H | -0.20840800 | -1.84614700 | 2.50674300  |
| H | -1.19699300 | -0.49282000 | 3.10943700  |
| C | 1.09938500  | -1.69843300 | -2.29733100 |
| H | 1.88639200  | -2.42025500 | -2.54085100 |
| H | 0.12996900  | -2.21002200 | -2.25475200 |
| H | 1.05267700  | -0.92488500 | -3.07277000 |

### 11E-Ph

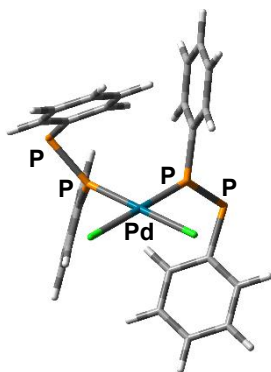

|   |             |             |             |
|---|-------------|-------------|-------------|
| C | -3.09204900 | -3.36951500 | 1.38914200  |
| C | -1.98229800 | -2.90288700 | 0.69483700  |
| C | -3.19424100 | -3.15803300 | 2.76338000  |
| C | -2.18239000 | -2.49208200 | 3.45025900  |
| H | -2.26627900 | -2.32809400 | 4.52253200  |
| C | -0.96022900 | -2.23893100 | 1.38664200  |
| P | 2.15537900  | -2.45655900 | 1.08447200  |
| C | 3.33890600  | -1.54983700 | 0.02775800  |
| C | 4.13994700  | -2.30067100 | -0.84204400 |
| C | 3.46783900  | -0.15596900 | 0.05658900  |
| C | 5.02545100  | -1.65918700 | -1.70126900 |
| C | 4.35886500  | 0.47931100  | -0.80151800 |
| C | 5.13080600  | -0.27014700 | -1.68656100 |
| H | 5.63497900  | -2.24667400 | -2.38499900 |
| H | 4.45166900  | 1.56418000  | -0.77465800 |
| C | 2.18246500  | 2.49077500  | 3.45092500  |
| C | 0.96022500  | 2.23847200  | 1.38725000  |
| C | 3.19429700  | 3.15699400  | 2.76427700  |
| H | 2.26638800  | 2.32634400  | 4.52312700  |
| C | 1.98227300  | 2.90270300  | 0.69567500  |
| C | 3.09205700  | 3.36902600  | 1.39012700  |
| P | -2.15540300 | 2.45632000  | 1.08517000  |
| C | -3.33893000 | 1.54991600  | 0.02816400  |
| C | -4.13996700 | 2.30095000  | -0.84146600 |
| C | -3.46786900 | 0.15604000  | 0.05667600  |
| C | -5.02548100 | 1.65966600  | -1.70082800 |

|    |             |             |             |
|----|-------------|-------------|-------------|
| C  | -4.35891100 | -0.47903600 | -0.80157200 |
| C  | -5.13085600 | 0.27062700  | -1.68643400 |
| H  | -5.63500800 | 2.24731400  | -2.38442000 |
| H  | -4.45171900 | -1.56391000 | -0.77495100 |
| P  | -0.43423800 | 1.58781200  | 0.44147900  |
| P  | 0.43419000  | -1.58788500 | 0.44106600  |
| Pd | 0.00000900  | 0.00019900  | -1.14927300 |
| Cl | 0.45856500  | -1.66867400 | -2.79342200 |
| Cl | -0.45851200 | 1.66956700  | -2.79291100 |
| C  | -1.06052200 | -2.03252600 | 2.76780200  |
| H  | -0.26963000 | -1.50580000 | 3.30132400  |
| C  | 1.06056800  | 2.03150600  | 2.76831800  |
| H  | 0.26968900  | 1.50457200  | 3.30165200  |
| H  | 5.82547600  | 0.22878100  | -2.35935300 |
| H  | 2.87712300  | 0.43465600  | 0.75706200  |
| H  | 4.05700500  | -3.38735100 | -0.86110400 |
| H  | -5.82554400 | -0.22813300 | -2.35933100 |
| H  | -4.05701000 | 3.38763200  | -0.86028200 |
| H  | -2.87714500 | -0.43476600 | 0.75699300  |
| H  | 4.07070100  | 3.51172600  | 3.30280200  |
| H  | 3.88295500  | 3.89360100  | 0.85736200  |
| H  | 1.90622600  | 3.04787300  | -0.38310000 |
| H  | -4.07061800 | -3.51300200 | 3.30179300  |
| H  | -3.88294400 | -3.89391600 | 0.85620300  |
| H  | -1.90627200 | -3.04765100 | -0.38399400 |

### 11E-Mes

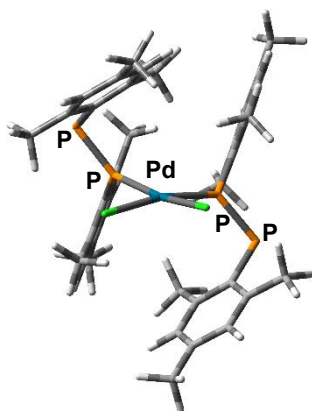

|   |             |             |             |
|---|-------------|-------------|-------------|
| C | -2.48377300 | 2.31725200  | 3.45068700  |
| C | -1.62281200 | 1.32707200  | 2.98545700  |
| C | -2.23326700 | 3.67088300  | 3.23167400  |
| C | -1.08049400 | 4.02764300  | 2.53234500  |
| H | -0.87748400 | 5.08423000  | 2.34783900  |
| C | -0.46399800 | 1.71505400  | 2.27751200  |
| P | 2.40820000  | 0.49726300  | 2.55921100  |
| C | 3.33536200  | -0.79617200 | 1.65078000  |
| C | 3.56912500  | -2.02952800 | 2.28694900  |
| C | 3.84576100  | -0.54546700 | 0.36016300  |
| C | 4.25293100  | -3.02323300 | 1.58721500  |
| C | 4.51306800  | -1.57331400 | -0.30176100 |
| C | 4.71511300  | -2.82280100 | 0.28849100  |

|   |             |             |             |
|---|-------------|-------------|-------------|
| H | 4.42501900  | -3.98567600 | 2.07287400  |
| H | 4.90309800  | -1.38785200 | -1.30527100 |
| C | 3.71963000  | 0.79656100  | -0.30166500 |
| C | 3.07692300  | -2.30553100 | 3.67613800  |
| C | 5.45935600  | -3.89821100 | -0.44331200 |
| C | 1.03145000  | 4.08003600  | -2.48102900 |
| C | 0.44194500  | 1.75706500  | -2.25739800 |
| C | 2.19222900  | 3.74611100  | -3.17810800 |
| H | 0.81451400  | 5.13170100  | -2.28467400 |
| C | 1.60938300  | 1.39214200  | -2.96386700 |
| C | 2.46073500  | 2.39832600  | -3.41184600 |
| P | -2.42057400 | 0.51452100  | -2.55264700 |
| C | -3.32819000 | -0.80209500 | -1.65776400 |

|    |             |             |             |   |             |             |             |
|----|-------------|-------------|-------------|---|-------------|-------------|-------------|
| C  | -3.55495900 | -2.02814300 | -2.31118900 | H | 5.17682700  | -3.93065400 | -1.50305600 |
| C  | -3.83477400 | -0.57497400 | -0.36179400 | H | 1.98268500  | -2.41709000 | 3.68416900  |
| C  | -4.22467900 | -3.03828600 | -1.62234600 | H | 3.33274900  | -1.49493100 | 4.37416800  |
| C  | -3.07326300 | -2.27720100 | -3.70910000 | H | 3.51104100  | -3.23195200 | 4.06990800  |
| C  | -4.48838000 | -1.61918200 | 0.28907700  | C | 1.94722800  | -0.04150100 | -3.24334800 |
| C  | -3.72432200 | 0.76030000  | 0.31638600  | H | 2.01283900  | -0.63959300 | -2.32136100 |
| C  | -4.67395300 | -2.86418000 | -0.31482800 | H | 1.18463100  | -0.52440700 | -3.87125600 |
| H  | -4.39612400 | -3.99295000 | -2.12341600 | H | 2.91041000  | -0.12178000 | -3.76097700 |
| H  | -4.88058000 | -1.44962000 | 1.29440200  | C | -1.09644800 | 3.57424200  | -1.29410300 |
| C  | -5.34685100 | -3.98006200 | 0.42500600  | H | -1.29720200 | 2.99223400  | -0.38351400 |
| P  | -0.61546600 | 0.42659200  | -1.61686900 | H | -0.99758200 | 4.62558600  | -0.99772900 |
| P  | 0.60737000  | 0.40618500  | 1.61569000  | H | -1.99110400 | 3.49392200  | -1.92660700 |
| Pd | 0.00327100  | -1.11797200 | -0.01305000 | C | 3.11578300  | 4.81092300  | -3.68351400 |
| Cl | 0.18662400  | -2.83196300 | 1.64767400  | H | 2.84070500  | 5.11303100  | -4.70386700 |
| Cl | -0.16846600 | -2.80599800 | -1.70145200 | H | 3.07493000  | 5.71030800  | -3.05766300 |
| C  | -0.17693400 | 3.08049000  | 2.05471500  | H | 4.15389000  | 4.45958000  | -3.71985300 |
| C  | 0.13722300  | 3.11612500  | -2.01933100 | C | -1.94205700 | -0.11404000 | 3.24758900  |
| H  | -1.97854900 | -2.38324400 | -3.72730000 | H | -2.00526000 | -0.70048800 | 2.31799800  |
| H  | -3.33837600 | -1.45620000 | -4.39127800 | H | -1.17046100 | -0.59610000 | 3.86511100  |
| H  | -3.50571400 | -3.19911600 | -4.11512100 | H | -2.90150800 | -0.21277800 | 3.76894900  |
| H  | -4.62295200 | -4.53555000 | 1.03784600  | C | 1.04870300  | 3.56156600  | 1.33079900  |
| H  | -5.80926100 | -4.69881900 | -0.26208100 | H | 1.94704800  | 3.48019200  | 1.95795800  |
| H  | -6.12135700 | -3.60379400 | 1.10472800  | H | 1.25076200  | 2.99545300  | 0.41045700  |
| H  | -4.34091900 | 0.78856700  | 1.22341600  | H | 0.93845400  | 4.61627400  | 1.05084200  |
| H  | -4.05362000 | 1.58040700  | -0.33873200 | C | -3.16659700 | 4.71845800  | 3.75490200  |
| H  | -2.69304200 | 0.99491700  | 0.61877400  | H | -2.87728800 | 5.02623300  | 4.76961200  |
| H  | 4.33933000  | 0.84471600  | -1.20572300 | H | -3.15429300 | 5.61835600  | 3.12848400  |
| H  | 4.03583600  | 1.61218100  | 0.36540300  | H | -4.19714800 | 4.34815200  | 3.81108700  |
| H  | 2.68655000  | 1.02185000  | -0.60469500 | H | -3.38278800 | 2.02029800  | 3.99387100  |
| H  | 6.54378600  | -3.72261700 | -0.40651300 | H | 3.36631600  | 2.11913700  | -3.95356200 |
| H  | 5.27187700  | -4.88645500 | -0.00741300 |   |             |             |             |

## 6. References

- S1. A. Tsurusaki, R. Ura and K. Kamikawa, *Dalton Trans.*, 2018, **47**, 4437-4441.
- S2. (a) J. A. Osborn, F. H. Jardine, J. F. Young and G. Wilkinson, *J. Chem. Soc. A*, 1966, 1711-1732. (b) J. A. Osborn, G. Wilkinson and J. J. Mrowca, *Inorg. Synth.*, 1967, **10**, 67-71.
- S3. (a) M. Yoshifuji, I. Shima, N. Inamoto, K. Hirotsu and T. Higuchi, *J. Am. Chem. Soc.*, 1981, **103**, 4587-4589. (b) E. Öberg, B. Schäfer, X.-L. Geng, J. Pettersson, Q. Hu, M. Kritikos, T. Rasmussen and S. Ott, *J. Org. Chem.*, 2009, **74**, 9265-9273.
- S4. D. A. White, J. R. Doyle and H. Lewis, *Inorg. Synth.*, 1972, **13**, 55-65.
- S5. J. Wiedermann, K. Mereiter and K. Kirchner, *J. Mol. Catal. A: Chem.*, 2006, **257**, 67-72.
- S6. K. Sato, Y. Inoue, T. Mori, A. Sakaue, A. Tarui, M. Omote, I. Kumadaki and A. Ando, *Org. Lett.*, 2014, **16**, 3756-3759.
- S7. M. C. Burla, R. Caliendo, B. Carrozzini, G. L. Casciaro, C. Cuocci, C. Giacovazzo, M. Mallamo, A. Mazzone and G. Polidori, *J. Appl. Cryst.*, 2015, **48**, 306-309.
- S8. C. Kabuto, S. Akine, T. Nemoto and E. Kwon, *J. Cryst. Soc. Jpn.*, 2009, **51**, 218-224.
- S9. G. M. Sheldrick, *Acta Cryst.*, 2015, **C71**, 3-8.
- S10. M. J. Frisch, G. W. Trucks, H. B. Schlegel, G. E. Scuseria, M. A. Robb, J. R. Cheeseman, G. Scalmani, V. Barone, B. Mennucci, G. A. Petersson, H. Nakatsuji, M. Caricato, X. Li, H. P. Hratchian, A. F. Izmaylov, J. Bloino, G. Zheng, J. L. Sonnenberg, M. Hada, M. Ehara, K. Toyota, R. Fukuda, J. Hasegawa, M. Ishida, T. Nakajima, Y. Honda, O. Kitao, H. Nakai, T. Vreven, J. A. Montgomery, Jr., J. E. Peralta, F. Ogliaro, M. Bearpark, J. J. Heyd, E. Brothers, K. N. Kudin, V. N. Staroverov, T. Keith, R. Kobayashi, J. Normand, K. Raghavachari, A. Rendell, J. C. Burant, S. S. Iyengar, J. Tomasi, M. Cossi, N. Rega, J. M. Millam, M. Klene, J. E. Knox, J. B. Cross, V. Bakken, C. Adamo, J. Jaramillo, R. Gomperts, R. E. Stratmann, O. Yazyev, A. J. Austin, R. Cammi, C. Pomelli, J. W. Ochterski, R. L. Martin, K. Morokuma, V. G. Zakrzewski, G. A. Voth, P. Salvador, J. J. Dannenberg, S. Dapprich, A. D. Daniels, O. Farkas, J. B. Foresman, J. V. Ortiz, J. Cioslowski and D. J. Fox, *Gaussian 09, Revision E.01*, Gaussian, Inc., Wallingford CT, 2013.
- S11. GRRM 14, S. Maeda, Y. Harabuchi, Y. Osada, T. Taketsugu, K. Morokuma and K. Ohno; (a) S. Maeda, K. Ohno and K. Morokuma, *J. Chem. Theory Comput.*, 2009, **5**, 2734-2743. (b) S. Maeda, E. Abe, M. Hatanaka, T. Taketsugu and K. Morokuma, *J. Chem. Theory Comput.*, 2012, **8**, 5058-5063. (c) S. Maeda, K. Ohno and K. Morokuma, *Phys. Chem. Chem. Phys.*, 2013, **15**, 3683-3701.
- S12. Y. Zhao and D. G. Truhlar, *Theor. Chem. Acc.*, 2008, **120**, 215-241.
- S13. D. Andrae, U. Häußermann, M. Dolg, H. Stoll and H. Preuß, *Theor. Chim. Acta*, 1990, **77**, 123-141.
- S14. M. Cossi, V. Barone, R. Cammi and J. Tomasi, *Chem. Phys. Lett.*, 1996, **255**, 327-335.
- S15. S. Grimme, J. Antony, S. Ehrlich and H. Krieg, *J. Chem. Phys.*, 2010, **132**, 154104-154119.
- S16. NBO 6.0. E. D. Glendening, J. K. Badenhoop, A. E. Reed, J. E. Carpenter, J. A. Bohmann, C. M. Morales, C. R. Landis and F. Weinhold.
- S17. C. Adamo and V. Barone, *J. Chem. Phys.*, 1999, **110**, 6158-6170.
- S18. (a) C. Lee, W. Yang and R. G. Parr, *Phys. Rev. B*, 1988, **37**, 785-789. (b) A. D. Becke, *Phys. Rev. A*,

- 1988, **38**, 3098-3100. (c) A. D. Becke, *J. Chem. Phys.*, 1993, **98**, 5648-5652.
- S19. (a) P. J. Hay and W. R. Wadt, *J. Chem. Phys.*, 1985, **82**, 270-283. (b) P. J. Hay and W. R. Wadt, *J. Chem. Phys.*, 1985, **82**, 299-310.
- S20. A. Tsurusaki, R. Ura and K. Kamikawa, *Organometallics*, 2020, **39**, 87-92.
- S21. M. Alajarfín, P. Molina, A. Vidal and F. Tovar, *Tetrahedron*, 1997, **53**, 13449-13472.
- S22. (a) J. P. Perdew, *Phys. Rev. B*, 1986, **33**, 8822-8824. (b) J. P. Perdew, *Phys. Rev. B*, 1986, **34**, 7406.
- S23. W.-M. Hoe, A. J. Cohen and N. C. Handy, *Chem. Phys. Lett.*, 2001, **341**, 319-328.
- S24. (a) N. C. Handy and A. J. Cohen, *Mol. Phys.*, 2001, **99**, 403-412. (b) J. P. Perdew, K. Burke and M. Ernzerhof, *Phys. Rev. Lett.*, 1996, **77**, 3865-3868.
- S25. A. D. Boese and J. M. L. Martin, *J. Chem. Phys.*, 2004, **121**, 3405-3416.
- S26. T. Yanai, D. P. Tew and N. C. Handy, *Chem. Phys. Lett.*, 2004, **393**, 51-57.
- S27. J.-D. Chai and M. Head-Gordon, *Phys. Chem. Chem. Phys.*, 2008, **10**, 6615-6620.
- S28. H. Iikura, T. Tsuneda, T. Yanai and K. Hirao, *J. Chem. Phys.*, 2001, **115**, 3540-3544.
